# Supplementary material
Source: PubMed Central journal article supplement (PMC8671150)
Supplement: NIHMS1713558-supplement-1.pdf [file NIHMS1713558-supplement-1.pdf]

434 ***Supplemental Data File.*** Data from PHIS of Krabbe patients, including numbers, procedures, and diagnoses.  
435

| Dx Version | Dx Code (ICD) | Dx Title (ICD)                                                             |
|------------|---------------|----------------------------------------------------------------------------|
| 0          | E7523         | Krabbe disease                                                             |
| 9          | 3300          | Leukodystrophy                                                             |
| 0          | Z931          | Gastrostomy status                                                         |
| 0          | R6250         | Unspecified lack of expected normal physiological development in childhood |
| 0          | R633          | Feeding difficulties                                                       |
| 0          | G40909        | Epilepsy, unspecified, not intractable, without status epilepticus         |
| 0          | K219          | Gastro-esophageal reflux disease without esophagitis                       |
| 9          | V441          | Gastrostomy status                                                         |
| 0          | F88           | Other disorders of psychological development                               |
| 0          | E7529         | Other sphingolipidosis                                                     |
| 0          | R6251         | Failure to thrive (child)                                                  |
| 0          | Z79899        | Other long term (current) drug therapy                                     |
| 0          | Z9481         | Bone marrow transplant status                                              |
| 0          | K5900         | Constipation, unspecified                                                  |
| 0          | R1310         | Dysphagia, unspecified                                                     |
| 0          | Z930          | Tracheostomy status                                                        |
| 0          | J069          | Acute upper respiratory infection, unspecified                             |
| 0          | Z9484         | Stem cells transplant status                                               |
| 0          | Z515          | Encounter for palliative care                                              |
| 0          | R569          | Unspecified convulsions                                                    |
| 0          | D801          | Nonfamilial hypogammaglobulinemia                                          |
| 0          | I10           | Essential (primary) hypertension                                           |
| 0          | Z9911         | Dependence on respirator [ventilator] status                               |
| 0          | E860          | Dehydration                                                                |
| 0          | Z9981         | Dependence on supplemental oxygen                                          |
| 0          | R509          | Fever, unspecified                                                         |
| 9          | 78340         | Unspecified lack of normal physiological development                       |
| 9          | 53081         | Esophageal reflux                                                          |
| 0          | N319          | Neuromuscular dysfunction of bladder, unspecified                          |
| 9          | 7833          | Feeding difficulties and mismanagement                                     |
| 0          | G4733         | Obstructive sleep apnea (adult) (pediatric)                                |
| 0          | R1110         | Vomiting, unspecified                                                      |
| 0          | J984          | Other disorders of lung                                                    |
| 0          | Z87440        | Personal history of urinary (tract) infections                             |
| 0          | B9789         | Other viral agents as the cause of diseases classified elsewhere           |
| 0          | G8250         | Quadriplegia, unspecified                                                  |
| 0          | E872          | Acidosis                                                                   |

|   |         |                                                                                          |
|---|---------|------------------------------------------------------------------------------------------|
| 0 | E8342   | Hypomagnesemia                                                                           |
| 9 | 34590   | Epilepsy, unspecified, without mention of intractable epilepsy                           |
| 0 | G9349   | Other encephalopathy                                                                     |
| 0 | R0902   | Hypoxemia                                                                                |
| 0 | N390    | Urinary tract infection, site not specified                                              |
| 0 | Q743    | Arthrogryposis multiplex congenita                                                       |
| 0 | R197    | Diarrhea, unspecified                                                                    |
| 0 | T865    | Complications of stem cell transplant                                                    |
| 9 | V4611   | Dependence on respirator, status                                                         |
| 0 | Y929    | Unspecified place or not applicable                                                      |
| 0 | J189    | Pneumonia, unspecified organism                                                          |
| 0 | J45909  | Unspecified asthma, uncomplicated                                                        |
| 0 | E871    | Hypo-osmolality and hyponatremia                                                         |
| 0 | J0410   | Acute tracheitis without obstruction                                                     |
| 0 | M2450   | Contracture, unspecified joint                                                           |
| 0 | Z66     | Do not resuscitate                                                                       |
| 0 | B348    | Other viral infections of unspecified site                                               |
| 0 | D649    | Anemia, unspecified                                                                      |
| 9 | 7810    | Abnormal involuntary movements                                                           |
| 0 | Q100    | Congenital ptosis                                                                        |
| 0 | J9811   | Atelectasis                                                                              |
| 0 | M62838  | Other muscle spasm                                                                       |
| 0 | G40209  | Localization-related (focal) (partial) symptomatic epilepsy and epileptic syndromes with |
| 0 | Z993    | Dependence on wheelchair                                                                 |
| 0 | Q688    | Other specified congenital musculoskeletal deformities                                   |
| 0 | T451X5A | Adverse effect of antineoplastic and immunosuppressive drugs, initial encounter          |
| 0 | K117    | Disturbances of salivary secretion                                                       |
| 0 | R1312   | Dysphagia, oropharyngeal phase                                                           |
| 9 | 78039   | Other convulsions                                                                        |
| 0 | Z95828  | Presence of other vascular implants and grafts                                           |
| 9 | 78060   | Fever, unspecified                                                                       |
| 9 | 78341   | Failure to thrive                                                                        |
| 0 | M419    | Scoliosis, unspecified                                                                   |
| 9 | 72885   | Spasm of muscle                                                                          |
| 0 | J690    | Pneumonitis due to inhalation of food and vomit                                          |
| 0 | R252    | Cramp and spasm                                                                          |
| 9 | V5869   | Long-term (current) use of other medications                                             |
| 0 | Z881    | Allergy status to other antibiotic agents status                                         |

|   |        |                                                                                                |
|---|--------|------------------------------------------------------------------------------------------------|
| 9 | 73730  | Scoliosis [and kyphoscoliosis], idiopathic                                                     |
| 9 | V440   | Tracheostomy status                                                                            |
| 0 | K9423  | Gastrostomy malfunction                                                                        |
| 0 | Z431   | Encounter for attention to gastrostomy                                                         |
| 0 | R000   | Tachycardia, unspecified                                                                       |
| 0 | J9601  | Acute respiratory failure with hypoxia                                                         |
| 0 | D89810 | Acute graft-versus-host disease                                                                |
| 0 | Z7722  | Contact with and (suspected) exposure to environmental tobacco smoke (acute) (chronic)         |
| 9 | 486    | Pneumonia, organism unspecified                                                                |
| 0 | Z9089  | Acquired absence of other organs                                                               |
| 0 | I420   | Dilated cardiomyopathy                                                                         |
| 0 | R5382  | Chronic fatigue, unspecified                                                                   |
| 0 | Z452   | Encounter for adjustment and management of vascular access device                              |
| 0 | E876   | Hypokalemia                                                                                    |
| 0 | R001   | Bradycardia, unspecified                                                                       |
| 0 | B349   | Viral infection, unspecified                                                                   |
| 9 | 4659   | Acute upper respiratory infections of unspecified site                                         |
| 9 | 51881  | Acute respiratory failure                                                                      |
| 0 | D709   | Neutropenia, unspecified                                                                       |
| 0 | J988   | Other specified respiratory disorders                                                          |
| 0 | Q02    | Microcephaly                                                                                   |
| 9 | V148   | Personal history of allergy to other specified medicinal agents                                |
| 0 | J9621  | Acute and chronic respiratory failure with hypoxia                                             |
| 0 | Z9351  | Cutaneous-vesicostomy status                                                                   |
| 0 | R21    | Rash and other nonspecific skin eruption                                                       |
| 0 | G9340  | Encephalopathy, unspecified                                                                    |
| 0 | Z7952  | Long term (current) use of systemic steroids                                                   |
| 0 | D696   | Thrombocytopenia, unspecified                                                                  |
| 0 | M6289  | Other specified disorders of muscle                                                            |
| 0 | J9610  | Chronic respiratory failure, unspecified whether with hypoxia or hypercapnia                   |
| 9 | V4281  | #MULTIVALUE                                                                                    |
| 0 | G40919 | Epilepsy, unspecified, intractable, without status epilepticus                                 |
| 0 | R269   | Unspecified abnormalities of gait and mobility                                                 |
| 0 | B965   | Pseudomonas (aeruginosa) (mallei) (pseudomallei) as the cause of diseases classified elsewhere |
| 9 | 36900  | Blindness of both eyes, impairment level not further specified                                 |
| 0 | D582   | Other hemoglobinopathies                                                                       |
| 0 | J0301  | Acute recurrent streptococcal tonsillitis                                                      |
| 9 | 591    | Hydronephrosis                                                                                 |

|   |       |                                                                                          |
|---|-------|------------------------------------------------------------------------------------------|
| 0 | R05   | Cough                                                                                    |
| 0 | Q211  | Atrial septal defect                                                                     |
| 9 | 56400 | Unspecified constipation                                                                 |
| 0 | R620  | Delayed milestone in childhood                                                           |
| 0 | Y848  | Other medical procedures as the cause of abnormal reaction of the patient, or of later c |
| 0 | E559  | Vitamin D deficiency, unspecified                                                        |
| 0 | Z934  | Other artificial openings of gastrointestinal tract status                               |
| 9 | 5990  | Urinary tract infection, site not specified                                              |
| 0 | N1330 | Unspecified hydronephrosis                                                               |
| 0 | N210  | Calculus in bladder                                                                      |
| 9 | 4254  | Other primary cardiomyopathies                                                           |
| 0 | R4182 | Altered mental status, unspecified                                                       |
| 0 | R680  | Hypothermia, not associated with low environmental temperature                           |
| 0 | E2740 | Unspecified adrenocortical insufficiency                                                 |
| 0 | E875  | Hyperkalemia                                                                             |
| 0 | L22   | Diaper dermatitis                                                                        |
| 0 | Z713  | Dietary counseling and surveillance                                                      |
| 9 | 78703 | Vomiting alone                                                                           |
| 9 | 78720 | Dysphagia, unspecified                                                                   |
| 0 | F79   | Unspecified intellectual disabilities                                                    |
| 0 | Z8701 | Personal history of pneumonia (recurrent)                                                |
| 9 | 7850  | Tachycardia, unspecified                                                                 |
| 9 | V551  | Attention to gastrostomy                                                                 |
| 0 | R9401 | Abnormal electroencephalogram [EEG]                                                      |
| 0 | Z981  | Arthrodesis status                                                                       |
| 9 | 5180  | Pulmonary collapse                                                                       |
| 9 | V141  | Personal history of allergy to other antibiotic agent                                    |
| 9 | 49390 | Asthma, unspecified, unspecified                                                         |
| 0 | R454  | Irritability and anger                                                                   |
| 0 | Z792  | Long term (current) use of antibiotics                                                   |
| 0 | R0689 | Other abnormalities of breathing                                                         |
| 0 | R5383 | Other fatigue                                                                            |
| 0 | H547  | Unspecified visual loss                                                                  |
| 9 | 3158  | Other specified delays in development                                                    |
| 9 | V1261 | #MULTIVALUE                                                                              |
| 0 | K429  | Umbilical hernia without obstruction or gangrene                                         |
| 0 | Z6221 | Child in welfare custody                                                                 |
| 0 | M4145 | Neuromuscular scoliosis, thoracolumbar region                                            |

|   |        |                                                                                        |
|---|--------|----------------------------------------------------------------------------------------|
| 0 | Z23    | Encounter for immunization                                                             |
| 9 | 51883  | Chronic respiratory failure                                                            |
| 9 | V667   | Encounter for palliative care                                                          |
| 0 | F72    | Severe intellectual disabilities                                                       |
| 0 | R1319  | Other dysphagia                                                                        |
| 9 | 5070   | Pneumonitis due to inhalation of food or vomitus                                       |
| 9 | 51889  | Other diseases of lung, not elsewhere classified                                       |
| 9 | 3899   | Unspecified hearing loss                                                               |
| 0 | K1230  | Oral mucositis (ulcerative), unspecified                                               |
| 0 | E8770  | Fluid overload, unspecified                                                            |
| 0 | E43    | Unspecified severe protein-calorie malnutrition                                        |
| 0 | F809   | Developmental disorder of speech and language, unspecified                             |
| 9 | 27651  | Dehydration                                                                            |
| 0 | G40901 | Epilepsy, unspecified, not intractable, with status epilepticus                        |
| 9 | 79902  | Hypoxemia                                                                              |
| 0 | D89813 | Graft-versus-host disease, unspecified                                                 |
| 0 | E273   | Drug-induced adrenocortical insufficiency                                              |
| 0 | G809   | Cerebral palsy, unspecified                                                            |
| 0 | R0683  | Snoring                                                                                |
| 0 | Z888   | Allergy status to other drugs, medicaments and biological substances status            |
| 0 | J9620  | Acute and chronic respiratory failure, unspecified whether with hypoxia or hypercapnia |
| 0 | M4140  | Neuromuscular scoliosis, site unspecified                                              |
| 0 | Z008   | Encounter for other general examination                                                |
| 0 | Z9489  | Other transplanted organ and tissue status                                             |
| 9 | 2752   | Disorders of magnesium metabolism                                                      |
| 0 | M6281  | Muscle weakness (generalized)                                                          |
| 9 | 32723  | Obstructive sleep apnea (adult) (pediatric)                                            |
| 9 | 34510  | Generalized convulsive epilepsy, without mention of intractable epilepsy               |
| 9 | V175   | Family history of asthma                                                               |
| 0 | Z936   | Other artificial openings of urinary tract status                                      |
| 9 | 71849  | Contracture of joint of multiple sites                                                 |
| 9 | 78729  | Other dysphagia                                                                        |
| 9 | V4451  | Cutaneous-vesicostomy status                                                           |
| 0 | B9710  | Unspecified enterovirus as the cause of diseases classified elsewhere                  |
| 0 | K1231  | Oral mucositis (ulcerative) due to antineoplastic therapy                              |
| 0 | R6521  | Severe sepsis with septic shock                                                        |
| 0 | Z98890 | Other specified postprocedural states                                                  |
| 0 | D61818 | Other pancytopenia                                                                     |

|   |        |                                                                                          |
|---|--------|------------------------------------------------------------------------------------------|
| 0 | E878   | Other disorders of electrolyte and fluid balance, not elsewhere classified               |
| 0 | I959   | Hypotension, unspecified                                                                 |
| 0 | K921   | Melena                                                                                   |
| 0 | K9429  | Other complications of gastrostomy                                                       |
| 0 | R6812  | Fussy infant (baby)                                                                      |
| 0 | Y92239 | Unspecified place in hospital as the place of occurrence of the external cause           |
| 0 | G40409 | Other generalized epilepsy and epileptic syndromes, not intractable, without status epi  |
| 0 | Y9289  | Other specified places as the place of occurrence of the external cause                  |
| 0 | B9620  | Unspecified Escherichia coli [E. coli] as the cause of diseases classified elsewhere     |
| 0 | E870   | Hyperosmolality and hypernatremia                                                        |
| 0 | I158   | Other secondary hypertension                                                             |
| 0 | K5909  | Other constipation                                                                       |
| 0 | Q6589  | Other specified congenital deformities of hip                                            |
| 0 | R6259  | Other lack of expected normal physiological development in childhood                     |
| 9 | 7813   | Lack of coordination                                                                     |
| 0 | Q673   | Plagiocephaly                                                                            |
| 9 | 3159   | Unspecified delay in development                                                         |
| 0 | G40309 | Generalized idiopathic epilepsy and epileptic syndromes, not intractable, without status |
| 9 | V172   | Family history of other neurological diseases                                            |
| 0 | B9689  | Other specified bacterial agents as the cause of diseases classified elsewhere           |
| 0 | D591   | Other autoimmune hemolytic anemias                                                       |
| 0 | H539   | Unspecified visual disturbance                                                           |
| 0 | R270   | Ataxia, unspecified                                                                      |
| 0 | Z825   | Family history of asthma and other chronic lower respiratory diseases                    |
| 0 | Z9221  | Personal history of antineoplastic chemotherapy                                          |
| 0 | Z982   | Presence of cerebrospinal fluid drainage device                                          |
| 0 | D689   | Coagulation defect, unspecified                                                          |
| 0 | J101   | Influenza due to other identified influenza virus with other respiratory manifestations  |
| 0 | K30    | Functional dyspepsia                                                                     |
| 0 | R634   | Abnormal weight loss                                                                     |
| 0 | Y92230 | Patient room in hospital as the place of occurrence of the external cause                |
| 0 | A419   | Sepsis, unspecified organism                                                             |
| 0 | B370   | Candidal stomatitis                                                                      |
| 0 | R278   | Other lack of coordination                                                               |
| 9 | 78791  | Diarrhea                                                                                 |
| 0 | B372   | Candidiasis of skin and nail                                                             |
| 0 | E441   | Mild protein-calorie malnutrition                                                        |
| 0 | L309   | Dermatitis, unspecified                                                                  |

|   |         |                                                                                          |
|---|---------|------------------------------------------------------------------------------------------|
| 9 | 9-E8798 | Other specified procedures as the cause of abnormal reaction of patient, or of later cor |
| 0 | T380X5A | Adverse effect of glucocorticoids and synthetic analogues, initial encounter             |
| 0 | Y830    | Surgical operation with transplant of whole organ as the cause of abnormal reaction of   |
| 9 | 0793    | Rhinovirus infection in conditions classified elsewhere and of unspecified site          |
| 9 | V1509   | Personal history of other allergy, other than to medicinal agents                        |
| 0 | B9561   | Methicillin susceptible Staphylococcus aureus infection as the cause of diseases class   |
| 9 | V462    | Dependence on supplemental oxygen                                                        |
| 0 | N200    | Calculus of kidney                                                                       |
| 0 | E8809   | Other disorders of plasma-protein metabolism, not elsewhere classified                   |
| 0 | J9600   | Acute respiratory failure, unspecified whether with hypoxia or hypercapnia               |
| 0 | P942    | Congenital hypotonia                                                                     |
| 0 | Q798    | Other congenital malformations of musculoskeletal system                                 |
| 0 | R030    | Elevated blood-pressure reading, without diagnosis of hypertension                       |
| 0 | R112    | Nausea with vomiting, unspecified                                                        |
| 0 | R259    | Unspecified abnormal involuntary movements                                               |
| 0 | R451    | Restlessness and agitation                                                               |
| 0 | R7881   | Bacteremia                                                                               |
| 0 | X58XXXA | Exposure to other specified factors, initial encounter                                   |
| 0 | Y939    | Activity, unspecified                                                                    |
| 0 | E46     | Unspecified protein-calorie malnutrition                                                 |
| 0 | J210    | Acute bronchiolitis due to respiratory syncytial virus                                   |
| 0 | J218    | Acute bronchiolitis due to other specified organisms                                     |
| 0 | J9622   | Acute and chronic respiratory failure with hypercapnia                                   |
| 0 | M8580   | Other specified disorders of bone density and structure, unspecified site                |
| 0 | N179    | Acute kidney failure, unspecified                                                        |
| 0 | Q753    | Macrocephaly                                                                             |
| 0 | R0981   | Nasal congestion                                                                         |
| 0 | R160    | Hepatomegaly, not elsewhere classified                                                   |
| 0 | F419    | Anxiety disorder, unspecified                                                            |
| 0 | J159    | Unspecified bacterial pneumonia                                                          |
| 0 | R29898  | Other symptoms and signs involving the musculoskeletal system                            |
| 0 | T80211A | Bloodstream infection due to central venous catheter, initial encounter                  |
| 9 | 53642   | Mechanical complication of gastrostomy                                                   |
| 9 | V4282   | Peripheral stem cells replaced by transplant                                             |
| 0 | B259    | Cytomegaloviral disease, unspecified                                                     |
| 0 | G40419  | Other generalized epilepsy and epileptic syndromes, intractable, without status epilept  |
| 0 | G40824  | Epileptic spasms, intractable, without status epilepticus                                |
| 0 | I4581   | Long QT syndrome                                                                         |



|   |        |                                                                                            |
|---|--------|--------------------------------------------------------------------------------------------|
| 0 | J9611  | Chronic respiratory failure with hypoxia                                                   |
| 0 | K029   | Dental caries, unspecified                                                                 |
| 0 | R930   | Abnormal findings on diagnostic imaging of skull and head, not elsewhere classified        |
| 9 | 3181   | Severe intellectual disabilities                                                           |
| 9 | 3432   | Quadriplegic infantile cerebral palsy                                                      |
| 9 | 3439   | Infantile cerebral palsy, unspecified                                                      |
| 9 | 75689  | Other specified congenital anomalies of muscle, tendon, fascia, and connective tissue      |
| 0 | G919   | Hydrocephalus, unspecified                                                                 |
| 0 | H540   | Blindness, both eyes                                                                       |
| 0 | Q651   | Congenital dislocation of hip, bilateral                                                   |
| 0 | Z48298 | Encounter for aftercare following other organ transplant                                   |
| 9 | 3591   | Hereditary progressive muscular dystrophy                                                  |
| 9 | 47819  | Other disease of nasal cavity and sinuses                                                  |
| 9 | 59654  | Neurogenic bladder NOS                                                                     |
| 9 | V1302  | Personal history of urinary (tract) infection                                              |
| 0 | A084   | Viral intestinal infection, unspecified                                                    |
| 0 | B970   | Adenovirus as the cause of diseases classified elsewhere                                   |
| 0 | E162   | Hypoglycemia, unspecified                                                                  |
| 0 | J219   | Acute bronchiolitis, unspecified                                                           |
| 0 | J353   | Hypertrophy of tonsils with hypertrophy of adenoids                                        |
| 0 | J9602  | Acute respiratory failure with hypercapnia                                                 |
| 0 | R0600  | Dyspnea, unspecified                                                                       |
| 0 | R188   | Other ascites                                                                              |
| 0 | Z8249  | Family history of ischemic heart disease and other diseases of the circulatory system      |
| 9 | 07999  | Unspecified viral infection                                                                |
| 0 | D6481  | Anemia due to antineoplastic chemotherapy                                                  |
| 0 | G249   | Dystonia, unspecified                                                                      |
| 0 | G4700  | Insomnia, unspecified                                                                      |
| 0 | R638   | Other symptoms and signs concerning food and fluid intake                                  |
| 0 | R740   | Nonspecific elevation of levels of transaminase and lactic acid dehydrogenase [LDH]        |
| 0 | Y834   | Other reconstructive surgery as the cause of abnormal reaction of the patient, or of late  |
| 0 | Z6852  | Body mass index (BMI) pediatric, 5th percentile to less than 85th percentile for age       |
| 9 | 34550  | Localization-related (focal) (partial) epilepsy and epileptic syndromes with simple partic |
| 9 | 42789  | Other specified cardiac dysrhythmias                                                       |
| 9 | 52100  | Unspecified dental caries                                                                  |
| 9 | 6910   | Diaper or napkin rash                                                                      |
| 9 | 78609  | Other dyspnea and respiratory abnormality                                                  |
| 9 | 7861   | Stridor                                                                                    |

|   |         |                                                                                          |
|---|---------|------------------------------------------------------------------------------------------|
| 9 | V0481   | Need for prophylactic vaccination and inoculation against influenza                      |
| 0 | D89811  | Chronic graft-versus-host disease                                                        |
| 0 | E669    | Obesity, unspecified                                                                     |
| 0 | G40822  | Epileptic spasms, not intractable, without status epilepticus                            |
| 0 | H548    | Legal blindness, as defined in USA                                                       |
| 0 | Z6854   | Body mass index (BMI) pediatric, greater than or equal to 95th percentile for age        |
| 0 | Z818    | Family history of other mental and behavioral disorders                                  |
| 0 | Z8669   | Personal history of other diseases of the nervous system and sense organs                |
| 9 | 2763    | Alkalosis                                                                                |
| 9 | 2768    | Hypopotassemia                                                                           |
| 9 | 4019    | Unspecified essential hypertension                                                       |
| 9 | 7289    | Unspecified disorder of muscle, ligament, and fascia                                     |
| 9 | 78342   | Delayed milestones                                                                       |
| 9 | 7862    | Cough                                                                                    |
| 9 | 9-E8783 | Surgical operation with formation of external stoma causing abnormal patient reaction,   |
| 0 | G6289   | Other specified polyneuropathies                                                         |
| 0 | K766    | Portal hypertension                                                                      |
| 0 | Q315    | Congenital laryngomalacia                                                                |
| 9 | 319     | #MULTIVALUE                                                                              |
| 9 | 51884   | Acute and chronic respiratory failure                                                    |
| 9 | V1269   | Personal history of other diseases of respiratory system                                 |
| 0 | F6381   | Intermittent explosive disorder                                                          |
| 0 | G40201  | Localization-related (focal) (partial) symptomatic epilepsy and epileptic syndromes with |
| 0 | I340    | Nonrheumatic mitral (valve) insufficiency                                                |
| 0 | M24561  | Contracture, right knee                                                                  |
| 0 | M24562  | Contracture, left knee                                                                   |
| 0 | S72322G | Displaced transverse fracture of shaft of left femur, subsequent encounter for closed fr |
| 9 | 27540   | Unspecified disorder of calcium metabolism                                               |
| 9 | 51909   | Other tracheostomy complications                                                         |
| 9 | 5941    | Other calculus in bladder                                                                |
| 9 | 59659   | Other functional disorder of bladder                                                     |
| 9 | V444    | Status of other artificial opening of gastrointestinal tract                             |
| 0 | B2700   | Gammaherpesviral mononucleosis without complication                                      |
| 0 | E8339   | Other disorders of phosphorus metabolism                                                 |
| 0 | F82     | Specific developmental disorder of motor function                                        |
| 0 | G253    | Myoclonus                                                                                |
| 0 | G319    | Degenerative disease of nervous system, unspecified                                      |
| 0 | G40109  | Localization-related (focal) (partial) symptomatic epilepsy and epileptic syndromes with |

|   |         |                                                                                              |
|---|---------|----------------------------------------------------------------------------------------------|
| 0 | H5500   | Unspecified nystagmus                                                                        |
| 0 | H5509   | Other forms of nystagmus                                                                     |
| 0 | I469    | Cardiac arrest, cause unspecified                                                            |
| 0 | K5903   | Drug induced constipation                                                                    |
| 0 | K765    | Hepatic veno-occlusive disease                                                               |
| 0 | L219    | Seborrheic dermatitis, unspecified                                                           |
| 0 | Y9389   | Activity, other specified                                                                    |
| 0 | Z22322  | Carrier or suspected carrier of Methicillin resistant Staphylococcus aureus                  |
| 0 | Z833    | Family history of diabetes mellitus                                                          |
| 0 | Z87898  | Personal history of other specified conditions                                               |
| 0 | Z978    | Presence of other specified devices                                                          |
| 9 | 78321   | Loss of weight                                                                               |
| 9 | 9-E8497 | #MULTIVALUE                                                                                  |
| 0 | B952    | Enterococcus as the cause of diseases classified elsewhere                                   |
| 0 | B961    | Klebsiella pneumoniae [K. pneumoniae] as the cause of diseases classified elsewhere          |
| 0 | D6959   | Other secondary thrombocytopenia                                                             |
| 0 | G40401  | Other generalized epilepsy and epileptic syndromes, not intractable, with status epilepticus |
| 0 | G4730   | Sleep apnea, unspecified                                                                     |
| 0 | G4737   | Central sleep apnea in conditions classified elsewhere                                       |
| 0 | G629    | Polyneuropathy, unspecified                                                                  |
| 0 | G800    | Spastic quadriplegic cerebral palsy                                                          |
| 0 | H109    | Unspecified conjunctivitis                                                                   |
| 0 | K6389   | Other specified diseases of intestine                                                        |
| 0 | L929    | Granulomatous disorder of the skin and subcutaneous tissue, unspecified                      |
| 0 | M6701   | Short Achilles tendon (acquired), right ankle                                                |
| 0 | Y999    | Unspecified external cause status                                                            |
| 0 | Z5111   | Encounter for antineoplastic chemotherapy                                                    |
| 0 | Z86718  | Personal history of other venous thrombosis and embolism                                     |
| 9 | 27900   | Hypogammaglobulinemia, unspecified                                                           |
| 9 | 3829    | Unspecified otitis media                                                                     |
| 9 | 46619   | Acute bronchiolitis due to other infectious organisms                                        |
| 9 | 5277    | Disturbance of salivary secretion                                                            |
| 9 | 6929    | Contact dermatitis and other eczema, unspecified cause                                       |
| 9 | 9-E9331 | Antineoplastic and immunosuppressive drugs causing adverse effects in therapeutic use        |
| 9 | V143    | Personal history of allergy to other anti-infective agent                                    |
| 9 | V4589   | Other postprocedural status                                                                  |
| 0 | E8840   | Mitochondrial metabolism disorder, unspecified                                               |
| 0 | F4322   | Adjustment disorder with anxiety                                                             |

|   |        |                                                                                     |
|---|--------|-------------------------------------------------------------------------------------|
| 0 | G40802 | Other epilepsy, not intractable, without status epilepticus                         |
| 0 | G4731  | Primary central sleep apnea                                                         |
| 0 | G8929  | Other chronic pain                                                                  |
| 0 | H9193  | Unspecified hearing loss, bilateral                                                 |
| 0 | M79604 | Pain in right leg                                                                   |
| 0 | Q539   | Undescended testicle, unspecified                                                   |
| 0 | Q661   | Congenital talipes calcaneovarus                                                    |
| 0 | Z2239  | Carrier of other specified bacterial diseases                                       |
| 9 | 3079   | Other and unspecified special symptoms or syndromes, not elsewhere classified       |
| 9 | 34400  | Quadriplegia, unspecified                                                           |
| 9 | 3804   | Impacted cerumen                                                                    |
| 9 | 73739  | Other kyphoscoliosis and scoliosis                                                  |
| 9 | 7455   | Ostium secundum type atrial septal defect                                           |
| 9 | V140   | Personal history of allergy to penicillin                                           |
| 9 | V554   | Attention to other artificial opening of digestive tract                            |
| 0 | I5022  | Chronic systolic (congestive) heart failure                                         |
| 0 | Z00129 | Encounter for routine child health examination without abnormal findings            |
| 0 | Z4659  | Encounter for fitting and adjustment of other gastrointestinal appliance and device |
| 0 | Z810   | Family history of intellectual disabilities                                         |
| 9 | 5531   | Umbilical hernia without mention of obstruction or gangrene                         |
| 9 | 58889  | Other specified disorders resulting from impaired renal function                    |
| 9 | 7197   | Difficulty in walking                                                               |
| 9 | 7839   | Other symptoms concerning nutrition, metabolism, and development                    |
| 9 | 99685  | Complications of bone marrow transplant                                             |
| 9 | V4986  | Do not resuscitate status                                                           |
| 0 | A082   | Adenoviral enteritis                                                                |
| 0 | B954   | Other streptococcus as the cause of diseases classified elsewhere                   |
| 0 | B9729  | Other coronavirus as the cause of diseases classified elsewhere                     |
| 0 | D473   | Essential (hemorrhagic) thrombocythemia                                             |
| 0 | D61810 | Antineoplastic chemotherapy induced pancytopenia                                    |
| 0 | D62    | Acute posthemorrhagic anemia                                                        |
| 0 | D72829 | Elevated white blood cell count, unspecified                                        |
| 0 | E440   | Moderate protein-calorie malnutrition                                               |
| 0 | E8351  | Hypocalcemia                                                                        |
| 0 | E8352  | Hypercalcemia                                                                       |
| 0 | G4089  | Other seizures                                                                      |
| 0 | G479   | Sleep disorder, unspecified                                                         |
| 0 | G610   | Guillain-Barre syndrome                                                             |

|   |         |                                                                                                       |
|---|---------|-------------------------------------------------------------------------------------------------------|
| 0 | G8918   | Other acute postprocedural pain                                                                       |
| 0 | G901    | Familial dysautonomia [Riley-Day]                                                                     |
| 0 | G930    | Cerebral cysts                                                                                        |
| 0 | H4720   | Unspecified optic atrophy                                                                             |
| 0 | H6690   | Otitis media, unspecified, unspecified ear                                                            |
| 0 | J029    | Acute pharyngitis, unspecified                                                                        |
| 0 | J398    | Other specified diseases of upper respiratory tract                                                   |
| 0 | J4520   | Mild intermittent asthma, uncomplicated                                                               |
| 0 | J90     | Pleural effusion, not elsewhere classified                                                            |
| 0 | K529    | Noninfective gastroenteritis and colitis, unspecified                                                 |
| 0 | K567    | Ileus, unspecified                                                                                    |
| 0 | K7689   | Other specified diseases of liver                                                                     |
| 0 | L271    | Localized skin eruption due to drugs and medicaments taken internally                                 |
| 0 | L538    | Other specified erythematous conditions                                                               |
| 0 | L928    | Other granulomatous disorders of the skin and subcutaneous tissue                                     |
| 0 | M2609   | Other specified anomalies of jaw size                                                                 |
| 0 | M952    | Other acquired deformity of head                                                                      |
| 0 | P9689   | Other specified conditions originating in the perinatal period                                        |
| 0 | Q999    | Chromosomal abnormality, unspecified                                                                  |
| 0 | R011    | Cardiac murmur, unspecified                                                                           |
| 0 | R0681   | Apnea, not elsewhere classified                                                                       |
| 0 | R109    | Unspecified abdominal pain                                                                            |
| 0 | R339    | Retention of urine, unspecified                                                                       |
| 0 | R34     | Anuria and oliguria                                                                                   |
| 0 | R502    | Drug induced fever                                                                                    |
| 0 | R531    | Weakness                                                                                              |
| 0 | T402X5A | Adverse effect of other opioids, initial encounter                                                    |
| 0 | T68XXXA | Hypothermia, initial encounter                                                                        |
| 0 | Y92009  | Unspecified place in unspecified non-institutional (private) residence as the place of occurrence     |
| 0 | Z430    | Encounter for attention to tracheostomy                                                               |
| 0 | Z62812  | Personal history of neglect in childhood                                                              |
| 0 | Z7682   | Awaiting organ transplant status                                                                      |
| 0 | Z843    | Family history of consanguinity                                                                       |
| 0 | Z883    | Allergy status to other anti-infective agents status                                                  |
| 0 | Z9989   | Dependence on other enabling machines and devices                                                     |
| 9 | 34540   | Localization-related (focal) (partial) epilepsy and epileptic syndromes with complex partial seizures |
| 9 | 4871    | Influenza with other respiratory manifestations                                                       |
| 9 | 52800   | Stomatitis and mucositis, unspecified                                                                 |

|   |        |                                                                                          |
|---|--------|------------------------------------------------------------------------------------------|
| 9 | 53640  | Unspecified gastrostomy complication                                                     |
| 9 | 73743  | Scoliosis associated with other conditions                                               |
| 9 | 78061  | Fever presenting with conditions classified elsewhere                                    |
| 9 | 78552  | Septic shock                                                                             |
| 9 | 7869   | Other symptoms involving respiratory system and chest                                    |
| 9 | 7907   | Bacteremia                                                                               |
| 9 | 7961   | Abnormal reflex                                                                          |
| 9 | V070   | Need for isolation                                                                       |
| 9 | V5881  | Fitting and adjustment of vascular catheter                                              |
| 9 | V653   | Dietary surveillance and counseling                                                      |
| 0 | B340   | Adenovirus infection, unspecified                                                        |
| 0 | D509   | Iron deficiency anemia, unspecified                                                      |
| 0 | E2749  | Other adrenocortical insufficiency                                                       |
| 0 | E873   | Alkalosis                                                                                |
| 0 | E874   | Mixed disorder of acid-base balance                                                      |
| 0 | E889   | Metabolic disorder, unspecified                                                          |
| 0 | F458   | Other somatoform disorders                                                               |
| 0 | G40219 | Localization-related (focal) (partial) symptomatic epilepsy and epileptic syndromes with |
| 0 | G910   | Communicating hydrocephalus                                                              |
| 0 | H903   | Sensorineural hearing loss, bilateral                                                    |
| 0 | I517   | Cardiomegaly                                                                             |
| 0 | K920   | Hematemesis                                                                              |
| 0 | K9422  | Gastrostomy infection                                                                    |
| 0 | L03311 | Cellulitis of abdominal wall                                                             |
| 0 | L210   | Seborrhea capitis                                                                        |
| 0 | M436   | Torticollis                                                                              |
| 0 | M792   | Neuralgia and neuritis, unspecified                                                      |
| 0 | P0737  | Preterm newborn, gestational age 34 completed weeks                                      |
| 0 | P09    | Abnormal findings on neonatal screening                                                  |
| 0 | R296   | Repeated falls                                                                           |
| 0 | R8290  | Unspecified abnormal findings in urine                                                   |
| 0 | R942   | Abnormal results of pulmonary function studies                                           |
| 0 | Y833   | Surgical operation with formation of external stoma as the cause of abnormal reaction    |
| 0 | Y92238 | Other place in hospital as the place of occurrence of the external cause                 |
| 0 | Z09    | Encounter for follow-up examination after completed treatment for conditions other than  |
| 0 | Z590   | Homelessness                                                                             |
| 0 | Z794   | Long term (current) use of insulin                                                       |
| 0 | Z820   | Family history of epilepsy and other diseases of the nervous system                      |

|   |         |                                                                                                     |
|---|---------|-----------------------------------------------------------------------------------------------------|
| 0 | Z91012  | Allergy to eggs                                                                                     |
| 0 | Z9189   | Other specified personal risk factors, not elsewhere classified                                     |
| 9 | 3154    | Developmental coordination disorder                                                                 |
| 9 | 34830   | Encephalopathy, unspecified                                                                         |
| 9 | 37710   | Optic atrophy, unspecified                                                                          |
| 9 | 4280    | Congestive heart failure, unspecified                                                               |
| 9 | 5119    | Unspecified pleural effusion                                                                        |
| 9 | 5589    | Other and unspecified noninfectious gastroenteritis and colitis                                     |
| 9 | 7806    | Fever                                                                                               |
| 9 | 7821    | Rash and other nonspecific skin eruption                                                            |
| 9 | V0382   | Need for prophylactic vaccination against Streptococcus pneumoniae                                  |
| 9 | V5865   | Long-term (current) use of steroids                                                                 |
| 0 | E8350   | Unspecified disorder of calcium metabolism                                                          |
| 0 | G808    | Other cerebral palsy                                                                                |
| 0 | G931    | Anoxic brain damage, not elsewhere classified                                                       |
| 0 | H04123  | Dry eye syndrome of bilateral lacrimal glands                                                       |
| 0 | H5015   | Alternating exotropia                                                                               |
| 0 | I428    | Other cardiomyopathies                                                                              |
| 0 | I429    | Cardiomyopathy, unspecified                                                                         |
| 0 | J0300   | Acute streptococcal tonsillitis, unspecified                                                        |
| 0 | M4850XA | Collapsed vertebra, not elsewhere classified, site unspecified, initial encounter for fracture      |
| 0 | M79605  | Pain in left leg                                                                                    |
| 0 | N3000   | Acute cystitis without hematuria                                                                    |
| 0 | Z9081   | Acquired absence of spleen                                                                          |
| 9 | 2827    | Other hemoglobinopathies                                                                            |
| 9 | 4253    | Endocardial fibroelastosis                                                                          |
| 9 | 5929    | Urinary calculus, unspecified                                                                       |
| 9 | 74361   | Congenital ptosis of eyelid                                                                         |
| 9 | V202    | Routine infant or child health check                                                                |
| 9 | V4985   | Dual sensory impairment                                                                             |
| 0 | A047    | Enterocolitis due to Clostridium difficile                                                          |
| 0 | A080    | Rotaviral enteritis                                                                                 |
| 0 | B084    | Enteroviral vesicular stomatitis with exanthem                                                      |
| 0 | B09     | Unspecified viral infection characterized by skin and mucous membrane lesions                       |
| 0 | B258    | Other cytomegaloviral diseases                                                                      |
| 0 | B341    | Enterovirus infection, unspecified                                                                  |
| 0 | B379    | Candidiasis, unspecified                                                                            |
| 0 | B9562   | Methicillin resistant Staphylococcus aureus infection as the cause of diseases classified elsewhere |

|   |        |                                                                                          |
|---|--------|------------------------------------------------------------------------------------------|
| 0 | B957   | Other staphylococcus as the cause of diseases classified elsewhere                       |
| 0 | B974   | Respiratory syncytial virus as the cause of diseases classified elsewhere                |
| 0 | D61811 | Other drug-induced pancytopenia                                                          |
| 0 | D72819 | Decreased white blood cell count, unspecified                                            |
| 0 | D849   | Immunodeficiency, unspecified                                                            |
| 0 | D899   | Disorder involving the immune mechanism, unspecified                                     |
| 0 | E6601  | Morbid (severe) obesity due to excess calories                                           |
| 0 | E7220  | Disorder of urea cycle metabolism, unspecified                                           |
| 0 | E7525  | Metachromatic leukodystrophy                                                             |
| 0 | F09    | Unspecified mental disorder due to known physiological condition                         |
| 0 | G3189  | Other specified degenerative diseases of nervous system                                  |
| 0 | G379   | Demyelinating disease of central nervous system, unspecified                             |
| 0 | G40211 | Localization-related (focal) (partial) symptomatic epilepsy and epileptic syndromes with |
| 0 | G478   | Other sleep disorders                                                                    |
| 0 | G9389  | Other specified disorders of brain                                                       |
| 0 | H029   | Unspecified disorder of eyelid                                                           |
| 0 | H52203 | Unspecified astigmatism, bilateral                                                       |
| 0 | H52209 | Unspecified astigmatism, unspecified eye                                                 |
| 0 | H6123  | Impacted cerumen, bilateral                                                              |
| 0 | H66001 | Acute suppurative otitis media without spontaneous rupture of ear drum, right ear        |
| 0 | H66003 | Acute suppurative otitis media without spontaneous rupture of ear drum, bilateral        |
| 0 | H6691  | Otitis media, unspecified, right ear                                                     |
| 0 | H6692  | Otitis media, unspecified, left ear                                                      |
| 0 | H905   | Unspecified sensorineural hearing loss                                                   |
| 0 | I272   | Other secondary pulmonary hypertension                                                   |
| 0 | I81    | Portal vein thrombosis                                                                   |
| 0 | J121   | Respiratory syncytial virus pneumonia                                                    |
| 0 | J15211 | Pneumonia due to Methicillin susceptible Staphylococcus aureus                           |
| 0 | J157   | Pneumonia due to Mycoplasma pneumoniae                                                   |
| 0 | J302   | Other seasonal allergic rhinitis                                                         |
| 0 | J329   | Chronic sinusitis, unspecified                                                           |
| 0 | J3489  | Other specified disorders of nose and nasal sinuses                                      |
| 0 | J811   | Chronic pulmonary edema                                                                  |
| 0 | J9690  | Respiratory failure, unspecified, unspecified whether with hypoxia or hypercapnia        |
| 0 | J9691  | Respiratory failure, unspecified with hypoxia                                            |
| 0 | J989   | Respiratory disorder, unspecified                                                        |
| 0 | K007   | Teething syndrome                                                                        |
| 0 | K2970  | Gastritis, unspecified, without bleeding                                                 |



|   |        |                                                                       |
|---|--------|-----------------------------------------------------------------------|
| 0 | K5901  | Slow transit constipation                                             |
| 0 | K9413  | Enterostomy malfunction                                               |
| 0 | L233   | Allergic contact dermatitis due to drugs in contact with skin         |
| 0 | L500   | Allergic urticaria                                                    |
| 0 | M4100  | Infantile idiopathic scoliosis, site unspecified                      |
| 0 | M6249  | Contracture of muscle, multiple sites                                 |
| 0 | M629   | Disorder of muscle, unspecified                                       |
| 0 | M6702  | Short Achilles tendon (acquired), left ankle                          |
| 0 | M79601 | Pain in right arm                                                     |
| 0 | O99284 | Endocrine, nutritional and metabolic diseases complicating childbirth |
| 0 | P375   | Neonatal candidiasis                                                  |
| 0 | P7883  | Newborn esophageal reflux                                             |
| 0 | P90    | Convulsions of newborn                                                |
| 0 | P926   | Failure to thrive in newborn                                          |
| 0 | P929   | Feeding problem of newborn, unspecified                               |
| 0 | Q174   | Misplaced ear                                                         |
| 0 | Q250   | Patent ductus arteriosus                                              |
| 0 | Q381   | Ankyloglossia                                                         |
| 0 | Q998   | Other specified chromosome abnormalities                              |
| 0 | R0603  | Acute respiratory distress                                            |
| 0 | R061   | Stridor                                                               |
| 0 | R062   | Wheezing                                                              |
| 0 | R1084  | Generalized abdominal pain                                            |
| 0 | R110   | Nausea                                                                |
| 0 | R162   | Hepatomegaly with splenomegaly, not elsewhere classified              |
| 0 | R220   | Localized swelling, mass and lump, head                               |
| 0 | R251   | Tremor, unspecified                                                   |
| 0 | R258   | Other abnormal involuntary movements                                  |
| 0 | R262   | Difficulty in walking, not elsewhere classified                       |
| 0 | R2689  | Other abnormalities of gait and mobility                              |
| 0 | R338   | Other retention of urine                                              |
| 0 | R4583  | Excessive crying of child, adolescent or adult                        |
| 0 | R4789  | Other speech disturbances                                             |
| 0 | R51    | Headache                                                              |
| 0 | R55    | Syncope and collapse                                                  |
| 0 | R571   | Hypovolemic shock                                                     |
| 0 | R6252  | Short stature (child)                                                 |
| 0 | R6813  | Apparent life threatening event in infant (ALTE)                      |

|   |         |                                                                                                                                          |
|---|---------|------------------------------------------------------------------------------------------------------------------------------------------|
| 0 | R9089   | Other abnormal findings on diagnostic imaging of central nervous system                                                                  |
| 0 | R9402   | Abnormal brain scan                                                                                                                      |
| 0 | T17990A | Other foreign object in respiratory tract, part unspecified in causing asphyxiation, initial encounter                                   |
| 0 | T360X5A | Adverse effect of penicillins, initial encounter                                                                                         |
| 0 | T368X5A | Adverse effect of other systemic antibiotics, initial encounter                                                                          |
| 0 | T50995A | Adverse effect of other drugs, medicaments and biological substances, initial encounter                                                  |
| 0 | T82868A | Thrombosis due to vascular prosthetic devices, implants and grafts, initial encounter                                                    |
| 0 | T8609   | Other complications of bone marrow transplant                                                                                            |
| 0 | Y838    | Other surgical procedures as the cause of abnormal reaction of the patient, or of later complication, without mention of organ or system |
| 0 | Z006    | Encounter for examination for normal comparison and control in clinical research program                                                 |
| 0 | Z283    | Underimmunization status                                                                                                                 |
| 0 | Z370    | Single live birth                                                                                                                        |
| 0 | Z3A39   | 39 weeks gestation of pregnancy                                                                                                          |
| 0 | Z4800   | Encounter for change or removal of nonsurgical wound dressing                                                                            |
| 0 | Z7689   | Persons encountering health services in other specified circumstances                                                                    |
| 0 | Z781    | Physical restraint status                                                                                                                |
| 0 | Z7951   | Long term (current) use of inhaled steroids                                                                                              |
| 0 | Z8349   | Family history of other endocrine, nutritional and metabolic diseases                                                                    |
| 0 | Z8619   | Personal history of other infectious and parasitic diseases                                                                              |
| 0 | Z8679   | Personal history of other diseases of the circulatory system                                                                             |
| 0 | Z880    | Allergy status to penicillin                                                                                                             |
| 0 | Z91018  | Allergy to other foods                                                                                                                   |
| 0 | Z9889   | Other specified postprocedural states                                                                                                    |
| 9 | 0389    | Unspecified septicemia                                                                                                                   |
| 9 | 0790    | Adenovirus infection in conditions classified elsewhere and of unspecified site                                                          |
| 9 | 1120    | Candidiasis of mouth                                                                                                                     |
| 9 | 2727    | Lipidoses                                                                                                                                |
| 9 | 2762    | Acidosis                                                                                                                                 |
| 9 | 2830    | Autoimmune hemolytic anemias                                                                                                             |
| 9 | 28800   | Neutropenia, unspecified                                                                                                                 |
| 9 | 32721   | Primary central sleep apnea                                                                                                              |
| 9 | 34889   | Other conditions of brain                                                                                                                |
| 9 | 34989   | Other specified disorders of nervous system                                                                                              |
| 9 | 3732    | Chalazion                                                                                                                                |
| 9 | 40599   | Other unspecified secondary hypertension                                                                                                 |
| 9 | 46611   | Acute bronchiolitis due to respiratory syncytial virus (RSV)                                                                             |
| 9 | 4801    | Pneumonia due to respiratory syncytial virus                                                                                             |
| 9 | 49391   | Asthma, unspecified, with status asthmaticus                                                                                             |

|   |        |                                                                                          |
|---|--------|------------------------------------------------------------------------------------------|
| 9 | 51882  | Other pulmonary insufficiency, not elsewhere classified                                  |
| 9 | 5280   | #MULTIVALUE                                                                              |
| 9 | 7080   | Allergic urticaria                                                                       |
| 9 | 71840  | Contracture of joint, site unspecified                                                   |
| 9 | 73390  | Disorder of bone and cartilage, unspecified                                              |
| 9 | 7483   | Other congenital anomalies of larynx, trachea, and bronchus                              |
| 9 | 7830   | Anorexia                                                                                 |
| 9 | 7852   | Undiagnosed cardiac murmurs                                                              |
| 9 | 78603  | Apnea                                                                                    |
| 9 | 78722  | Dysphagia, oropharyngeal phase                                                           |
| 9 | 79922  | Irritability                                                                             |
| 9 | 99592  | Severe sepsis                                                                            |
| 9 | 9961   | Mechanical complication of other vascular device, implant, and graft                     |
| 9 | 99659  | Mechanical complication due to other implant and internal device, not elsewhere class    |
| 9 | V180   | Family history of diabetes mellitus                                                      |
| 0 | A4150  | Gram-negative sepsis, unspecified                                                        |
| 0 | A4902  | Methicillin resistant Staphylococcus aureus infection, unspecified site                  |
| 0 | D573   | Sickle-cell trait                                                                        |
| 0 | E099   | Drug or chemical induced diabetes mellitus without complications                         |
| 0 | E639   | Nutritional deficiency, unspecified                                                      |
| 0 | F329   | Major depressive disorder, single episode, unspecified                                   |
| 0 | F4321  | Adjustment disorder with depressed mood                                                  |
| 0 | F802   | Mixed receptive-expressive language disorder                                             |
| 0 | G40311 | Generalized idiopathic epilepsy and epileptic syndromes, intractable, with status epilep |
| 0 | G801   | Spastic diplegic cerebral palsy                                                          |
| 0 | G8111  | Spastic hemiplegia affecting right dominant side                                         |
| 0 | H04129 | Dry eye syndrome of unspecified lacrimal gland                                           |
| 0 | H538   | Other visual disturbances                                                                |
| 0 | H9190  | Unspecified hearing loss, unspecified ear                                                |
| 0 | I129   | Hypertensive chronic kidney disease with stage 1 through stage 4 chronic kidney disea    |
| 0 | I5023  | Acute on chronic systolic (congestive) heart failure                                     |
| 0 | I5042  | Chronic combined systolic (congestive) and diastolic (congestive) heart failure          |
| 0 | I6783  | Posterior reversible encephalopathy syndrome                                             |
| 0 | I8511  | Secondary esophageal varices with bleeding                                               |
| 0 | J1289  | Other viral pneumonia                                                                    |
| 0 | J324   | Chronic pansinusitis                                                                     |
| 0 | J3501  | Chronic tonsillitis                                                                      |
| 0 | J351   | Hypertrophy of tonsils                                                                   |

|   |         |                                                                                          |
|---|---------|------------------------------------------------------------------------------------------|
| 0 | K208    | Other esophagitis                                                                        |
| 0 | K5904   | Chronic idiopathic constipation                                                          |
| 0 | K7460   | Unspecified cirrhosis of liver                                                           |
| 0 | K8020   | Calculus of gallbladder without cholecystitis without obstruction                        |
| 0 | K9049   | Malabsorption due to intolerance, not elsewhere classified                               |
| 0 | L231    | Allergic contact dermatitis due to adhesives                                             |
| 0 | M21059  | Valgus deformity, not elsewhere classified, unspecified hip                              |
| 0 | M24451  | Recurrent dislocation, right hip                                                         |
| 0 | M24452  | Recurrent dislocation, left hip                                                          |
| 0 | M4000   | Postural kyphosis, site unspecified                                                      |
| 0 | N189    | Chronic kidney disease, unspecified                                                      |
| 0 | N281    | Cyst of kidney, acquired                                                                 |
| 0 | Q5320   | Undescended testicle, unspecified, bilateral                                             |
| 0 | Q660    | Congenital talipes equinovarus                                                           |
| 0 | R488    | Other symbolic dysfunctions                                                              |
| 0 | R82994  | Hypercalciuria                                                                           |
| 0 | S72002D | Fracture of unspecified part of neck of left femur, subsequent encounter for closed frac |
| 0 | W07XXXA | Fall from chair, initial encounter                                                       |
| 0 | Y33XXXA | Other specified events, undetermined intent, initial encounter                           |
| 0 | Z1624   | Resistance to multiple antibiotics                                                       |
| 0 | Z434    | Encounter for attention to other artificial openings of digestive tract                  |
| 0 | Z4682   | Encounter for fitting and adjustment of non-vascular catheter                            |
| 0 | Z4789   | Encounter for other orthopedic aftercare                                                 |
| 0 | Z48290  | Encounter for aftercare following bone marrow transplant                                 |
| 0 | Z6851   | Body mass index (BMI) pediatric, less than 5th percentile for age                        |
| 0 | Z789    | Other specified health status                                                            |
| 0 | Z7901   | Long term (current) use of anticoagulants                                                |
| 0 | Z7982   | Long term (current) use of aspirin                                                       |
| 0 | Z841    | Family history of disorders of kidney and ureter                                         |
| 0 | Z8489   | Family history of other specified conditions                                             |
| 0 | Z8739   | Personal history of other diseases of the musculoskeletal system and connective tissu    |
| 0 | Z9109   | Other allergy status, other than to drugs and biological substances                      |
| 0 | Z9352   | Appendico-vesicostomy status                                                             |
| 9 | 04185   | Bacterial infection due to other gram-negative organisms                                 |
| 9 | 1123    | Candidiasis of skin and nails                                                            |
| 9 | 25541   | Glucocorticoid deficiency                                                                |
| 9 | 2769    | Electrolyte and fluid disorders not elsewhere classified                                 |
| 9 | 2793    | Unspecified immunity deficiency                                                          |

|   |       |                                                                                          |
|---|-------|------------------------------------------------------------------------------------------|
| 9 | 27950 | Graft-versus-host disease, unspecified                                                   |
| 9 | 3155  | Mixed development disorder                                                               |
| 9 | 32727 | Central sleep apnea in conditions classified elsewhere                                   |
| 9 | 34591 | Epilepsy, unspecified, with intractable epilepsy                                         |
| 9 | 34839 | Other encephalopathy                                                                     |
| 9 | 47410 | Hypertrophy of tonsil with adenoids                                                      |
| 9 | 49392 | Asthma, unspecified, with (acute) exacerbation                                           |
| 9 | 53649 | Other gastrostomy complication                                                           |
| 9 | 5533  | Diaphragmatic hernia without mention of obstruction or gangrene                          |
| 9 | 5789  | Hemorrhage of gastrointestinal tract, unspecified                                        |
| 9 | 5959  | Cystitis, unspecified                                                                    |
| 9 | 6826  | Cellulitis and abscess of leg, except foot                                               |
| 9 | 7466  | Congenital mitral insufficiency                                                          |
| 9 | 7560  | Congenital anomalies of skull and face bones                                             |
| 9 | 78192 | Abnormal posture                                                                         |
| 9 | 78199 | Other symptoms involving nervous and musculoskeletal systems                             |
| 9 | 7930  | Nonspecific (abnormal) findings on radiological and other examination of skull and head  |
| 9 | 9331  | Foreign body in larynx                                                                   |
| 9 | V0482 | Need for prophylactic vaccination and inoculation against respiratory syncytial virus (R |
| 9 | V0489 | Need for prophylactic vaccination and inoculation against other viral diseases           |
| 9 | V053  | Need for prophylactic vaccination and inoculation against viral hepatitis                |
| 9 | V1279 | Personal history of other specified digestive system diseases                            |
| 9 | V1301 | Personal history of urinary calculi                                                      |
| 9 | V1583 | Personal history of underimmunization status                                             |
| 9 | V1588 | Personal history of fall, presenting hazards to health                                   |
| 9 | V4289 | Other organ or tissue replaced by transplant                                             |
| 0 | A0472 | Enterocolitis due to Clostridium difficile, not specified as recurrent                   |
| 0 | A09   | Infectious gastroenteritis and colitis, unspecified                                      |
| 0 | A400  | Sepsis due to streptococcus, group A                                                     |
| 0 | A4102 | Sepsis due to Methicillin resistant Staphylococcus aureus                                |
| 0 | A411  | Sepsis due to other specified staphylococcus                                             |
| 0 | A4901 | Methicillin susceptible Staphylococcus aureus infection, unspecified site                |
| 0 | A499  | Bacterial infection, unspecified                                                         |
| 0 | B019  | Varicella without complication                                                           |
| 0 | B309  | Viral conjunctivitis, unspecified                                                        |
| 0 | B354  | Tinea corporis                                                                           |
| 0 | B371  | Pulmonary candidiasis                                                                    |
| 0 | B49   | Unspecified mycosis                                                                      |

|   |        |                                                                                    |
|---|--------|------------------------------------------------------------------------------------|
| 0 | B850   | Pediculosis due to <i>Pediculus humanus capitis</i>                                |
| 0 | B86    | Scabies                                                                            |
| 0 | B950   | Streptococcus, group A, as the cause of diseases classified elsewhere              |
| 0 | B958   | Unspecified staphylococcus as the cause of diseases classified elsewhere           |
| 0 | B9719  | Other enterovirus as the cause of diseases classified elsewhere                    |
| 0 | B9781  | Human metapneumovirus as the cause of diseases classified elsewhere                |
| 0 | B999   | Unspecified infectious disease                                                     |
| 0 | D229   | Melanocytic nevi, unspecified                                                      |
| 0 | D234   | Other benign neoplasm of skin of scalp and neck                                    |
| 0 | D501   | Sideropenic dysphagia                                                              |
| 0 | D6851  | Activated protein C resistance                                                     |
| 0 | D6941  | Evans syndrome                                                                     |
| 0 | D701   | Agranulocytosis secondary to cancer chemotherapy                                   |
| 0 | D702   | Other drug-induced agranulocytosis                                                 |
| 0 | D708   | Other neutropenia                                                                  |
| 0 | D7589  | Other specified diseases of blood and blood-forming organs                         |
| 0 | D8989  | Other specified disorders involving the immune mechanism, not elsewhere classified |
| 0 | E039   | Hypothyroidism, unspecified                                                        |
| 0 | E063   | Autoimmune thyroiditis                                                             |
| 0 | E079   | Disorder of thyroid, unspecified                                                   |
| 0 | E0965  | Drug or chemical induced diabetes mellitus with hyperglycemia                      |
| 0 | E109   | Type 1 diabetes mellitus without complications                                     |
| 0 | E139   | Other specified diabetes mellitus without complications                            |
| 0 | E222   | Syndrome of inappropriate secretion of antidiuretic hormone                        |
| 0 | E278   | Other specified disorders of adrenal gland                                         |
| 0 | E301   | Precocious puberty                                                                 |
| 0 | E663   | Overweight                                                                         |
| 0 | E739   | Lactose intolerance, unspecified                                                   |
| 0 | E749   | Disorder of carbohydrate metabolism, unspecified                                   |
| 0 | E7629  | Other mucopolysaccharidoses                                                        |
| 0 | E806   | Other disorders of bilirubin metabolism                                            |
| 0 | E8341  | Hypermagnesemia                                                                    |
| 0 | E8359  | Other disorders of calcium metabolism                                              |
| 0 | E8849  | Other mitochondrial metabolism disorders                                           |
| 0 | F17210 | Nicotine dependence, cigarettes, uncomplicated                                     |
| 0 | F3481  | Disruptive mood dysregulation disorder                                             |
| 0 | F418   | Other specified anxiety disorders                                                  |
| 0 | F430   | Acute stress reaction                                                              |

|   |        |                                                                                            |
|---|--------|--------------------------------------------------------------------------------------------|
| 0 | F482   | Pseudobulbar affect                                                                        |
| 0 | F59    | Unspecified behavioral syndromes associated with physiological disturbances and phy        |
| 0 | F8081  | Childhood onset fluency disorder                                                           |
| 0 | F840   | Autistic disorder                                                                          |
| 0 | F908   | Attention-deficit hyperactivity disorder, other type                                       |
| 0 | F911   | Conduct disorder, childhood-onset type                                                     |
| 0 | F948   | Other childhood disorders of social functioning                                            |
| 0 | F9829  | Other feeding disorders of infancy and early childhood                                     |
| 0 | F983   | Pica of infancy and childhood                                                              |
| 0 | G259   | Extrapyramidal and movement disorder, unspecified                                          |
| 0 | G3182  | Leigh's disease                                                                            |
| 0 | G40009 | Localization-related (focal) (partial) idiopathic epilepsy and epileptic syndromes with se |
| 0 | G40011 | Localization-related (focal) (partial) idiopathic epilepsy and epileptic syndromes with se |
| 0 | G40019 | Localization-related (focal) (partial) idiopathic epilepsy and epileptic syndromes with se |
| 0 | G40101 | Localization-related (focal) (partial) symptomatic epilepsy and epileptic syndromes with   |
| 0 | G40301 | Generalized idiopathic epilepsy and epileptic syndromes, not intractable, with status ep   |
| 0 | G40813 | Lennox-Gastaut syndrome, intractable, with status epilepticus                              |
| 0 | G40814 | Lennox-Gastaut syndrome, intractable, without status epilepticus                           |
| 0 | G4710  | Hypersomnia, unspecified                                                                   |
| 0 | G4720  | Circadian rhythm sleep disorder, unspecified type                                          |
| 0 | G510   | Bell's palsy                                                                               |
| 0 | G63    | Polyneuropathy in diseases classified elsewhere                                            |
| 0 | G709   | Myoneural disorder, unspecified                                                            |
| 0 | G710   | Muscular dystrophy                                                                         |
| 0 | G839   | Paralytic syndrome, unspecified                                                            |
| 0 | G902   | Horner's syndrome                                                                          |
| 0 | G904   | Autonomic dysreflexia                                                                      |
| 0 | G909   | Disorder of the autonomic nervous system, unspecified                                      |
| 0 | G911   | Obstructive hydrocephalus                                                                  |
| 0 | G92    | Toxic encephalopathy                                                                       |
| 0 | G9341  | Metabolic encephalopathy                                                                   |
| 0 | G936   | Cerebral edema                                                                             |
| 0 | G94    | Other disorders of brain in diseases classified elsewhere                                  |
| 0 | G950   | Syringomyelia and syringobulbia                                                            |
| 0 | G988   | Other disorders of nervous system                                                          |
| 0 | H00015 | Hordeolum externum left lower eyelid                                                       |
| 0 | H02402 | Unspecified ptosis of left eyelid                                                          |
| 0 | H02403 | Unspecified ptosis of bilateral eyelids                                                    |

|   |        |                                                                                            |
|---|--------|--------------------------------------------------------------------------------------------|
| 0 | H11421 | Conjunctival edema, right eye                                                              |
| 0 | H1789  | Other corneal scars and opacities                                                          |
| 0 | H47293 | Other optic atrophy, bilateral                                                             |
| 0 | H47619 | Cortical blindness, unspecified side of brain                                              |
| 0 | H4940  | Progressive external ophthalmoplegia, unspecified eye                                      |
| 0 | H5000  | Unspecified esotropia                                                                      |
| 0 | H5010  | Unspecified exotropia                                                                      |
| 0 | H5017  | Alternating exotropia with V pattern                                                       |
| 0 | H518   | Other specified disorders of binocular movement                                            |
| 0 | H5210  | Myopia, unspecified eye                                                                    |
| 0 | H5213  | Myopia, bilateral                                                                          |
| 0 | H5231  | Anisometropia                                                                              |
| 0 | H5702  | Anisocoria                                                                                 |
| 0 | H578   | Other specified disorders of eye and adnexa                                                |
| 0 | H5789  | Other specified disorders of eye and adnexa                                                |
| 0 | H6012  | Cellulitis of left external ear                                                            |
| 0 | H6090  | Unspecified otitis externa, unspecified ear                                                |
| 0 | H6120  | Impacted cerumen, unspecified ear                                                          |
| 0 | H6122  | Impacted cerumen, left ear                                                                 |
| 0 | H65193 | Other acute nonsuppurative otitis media, bilateral                                         |
| 0 | H6533  | Chronic mucoid otitis media, bilateral                                                     |
| 0 | H65491 | Other chronic nonsuppurative otitis media, right ear                                       |
| 0 | H65493 | Other chronic nonsuppurative otitis media, bilateral                                       |
| 0 | H65499 | Other chronic nonsuppurative otitis media, unspecified ear                                 |
| 0 | H66002 | Acute suppurative otitis media without spontaneous rupture of ear drum, left ear           |
| 0 | H6641  | Suppurative otitis media, unspecified, right ear                                           |
| 0 | H6693  | Otitis media, unspecified, bilateral                                                       |
| 0 | H902   | Conductive hearing loss, unspecified                                                       |
| 0 | H9041  | Sensorineural hearing loss, unilateral, right ear, with unrestricted hearing on the contra |
| 0 | H9209  | Otalgia, unspecified ear                                                                   |
| 0 | I071   | Rheumatic tricuspid insufficiency                                                          |
| 0 | I081   | Rheumatic disorders of both mitral and tricuspid valves                                    |
| 0 | I159   | Secondary hypertension, unspecified                                                        |
| 0 | I2699  | Other pulmonary embolism without acute cor pulmonale                                       |
| 0 | I313   | Pericardial effusion (noninflammatory)                                                     |
| 0 | I361   | Nonrheumatic tricuspid (valve) insufficiency                                               |
| 0 | I43    | Cardiomyopathy in diseases classified elsewhere                                            |
| 0 | I456   | Pre-excitation syndrome                                                                    |



|   |        |                                                                                          |
|---|--------|------------------------------------------------------------------------------------------|
| 0 | I493   | Ventricular premature depolarization                                                     |
| 0 | I495   | Sick sinus syndrome                                                                      |
| 0 | I498   | Other specified cardiac arrhythmias                                                      |
| 0 | I499   | Cardiac arrhythmia, unspecified                                                          |
| 0 | I5043  | Acute on chronic combined systolic (congestive) and diastolic (congestive) heart failure |
| 0 | I509   | Heart failure, unspecified                                                               |
| 0 | I514   | Myocarditis, unspecified                                                                 |
| 0 | I676   | Nonpyogenic thrombosis of intracranial venous system                                     |
| 0 | I82210 | Acute embolism and thrombosis of superior vena cava                                      |
| 0 | I82409 | Acute embolism and thrombosis of unspecified deep veins of unspecified lower extrem      |
| 0 | I82411 | Acute embolism and thrombosis of right femoral vein                                      |
| 0 | I82412 | Acute embolism and thrombosis of left femoral vein                                       |
| 0 | I82421 | Acute embolism and thrombosis of right iliac vein                                        |
| 0 | I82890 | Acute embolism and thrombosis of other specified veins                                   |
| 0 | I82C11 | Acute embolism and thrombosis of right internal jugular vein                             |
| 0 | I8500  | Esophageal varices without bleeding                                                      |
| 0 | I9589  | Other hypotension                                                                        |
| 0 | I973   | Postprocedural hypertension                                                              |
| 0 | J0391  | Acute recurrent tonsillitis, unspecified                                                 |
| 0 | J1000  | Influenza due to other identified influenza virus with unspecified type of pneumonia     |
| 0 | J120   | Adenoviral pneumonia                                                                     |
| 0 | J123   | Human metapneumovirus pneumonia                                                          |
| 0 | J151   | Pneumonia due to Pseudomonas                                                             |
| 0 | J156   | Pneumonia due to other Gram-negative bacteria                                            |
| 0 | J181   | Lobar pneumonia, unspecified organism                                                    |
| 0 | J206   | Acute bronchitis due to rhinovirus                                                       |
| 0 | J208   | Acute bronchitis due to other specified organisms                                        |
| 0 | J211   | Acute bronchiolitis due to human metapneumovirus                                         |
| 0 | J309   | Allergic rhinitis, unspecified                                                           |
| 0 | J312   | Chronic pharyngitis                                                                      |
| 0 | J3502  | Chronic adenoiditis                                                                      |
| 0 | J352   | Hypertrophy of adenoids                                                                  |
| 0 | J386   | Stenosis of larynx                                                                       |
| 0 | J392   | Other diseases of pharynx                                                                |
| 0 | J42    | Unspecified chronic bronchitis                                                           |
| 0 | J4530  | Mild persistent asthma, uncomplicated                                                    |
| 0 | J45901 | Unspecified asthma with (acute) exacerbation                                             |
| 0 | J470   | Bronchiectasis with acute lower respiratory infection                                    |

|   |        |                                                                                         |
|---|--------|-----------------------------------------------------------------------------------------|
| 0 | J80    | Acute respiratory distress syndrome                                                     |
| 0 | J918   | Pleural effusion in other conditions classified elsewhere                               |
| 0 | J9509  | Other tracheostomy complication                                                         |
| 0 | J95821 | Acute postprocedural respiratory failure                                                |
| 0 | J95851 | Ventilator associated pneumonia                                                         |
| 0 | J9612  | Chronic respiratory failure with hypercapnia                                            |
| 0 | J9809  | Other diseases of bronchus, not elsewhere classified                                    |
| 0 | J99    | Respiratory disorders in diseases classified elsewhere                                  |
| 0 | K035   | Ankylosis of teeth                                                                      |
| 0 | K089   | Disorder of teeth and supporting structures, unspecified                                |
| 0 | K121   | Other forms of stomatitis                                                               |
| 0 | K1232  | Oral mucositis (ulcerative) due to other drugs                                          |
| 0 | K1239  | Other oral mucositis (ulcerative)                                                       |
| 0 | K1370  | Unspecified lesions of oral mucosa                                                      |
| 0 | K148   | Other diseases of tongue                                                                |
| 0 | K200   | Eosinophilic esophagitis                                                                |
| 0 | K210   | Gastro-esophageal reflux disease with esophagitis                                       |
| 0 | K2211  | Ulcer of esophagus with bleeding                                                        |
| 0 | K2961  | Other gastritis with bleeding                                                           |
| 0 | K3184  | Gastroparesis                                                                           |
| 0 | K319   | Disease of stomach and duodenum, unspecified                                            |
| 0 | K4020  | Bilateral inguinal hernia, without obstruction or gangrene, not specified as recurrent  |
| 0 | K449   | Diaphragmatic hernia without obstruction or gangrene                                    |
| 0 | K521   | Toxic gastroenteritis and colitis                                                       |
| 0 | K559   | Vascular disorder of intestine, unspecified                                             |
| 0 | K658   | Other peritonitis                                                                       |
| 0 | K659   | Peritonitis, unspecified                                                                |
| 0 | K668   | Other specified disorders of peritoneum                                                 |
| 0 | K7200  | Acute and subacute hepatic failure without coma                                         |
| 0 | K740   | Hepatic fibrosis                                                                        |
| 0 | K7469  | Other cirrhosis of liver                                                                |
| 0 | K760   | Fatty (change of) liver, not elsewhere classified                                       |
| 0 | K859   | Acute pancreatitis, unspecified                                                         |
| 0 | K913   | Postprocedural intestinal obstruction                                                   |
| 0 | K9171  | Accidental puncture and laceration of a digestive system organ or structure during a di |
| 0 | K922   | Gastrointestinal hemorrhage, unspecified                                                |
| 0 | K9420  | Gastrostomy complication, unspecified                                                   |
| 0 | L0100  | Impetigo, unspecified                                                                   |

|   |        |                                                                                  |
|---|--------|----------------------------------------------------------------------------------|
| 0 | L0109  | Other impetigo                                                                   |
| 0 | L0201  | Cutaneous abscess of face                                                        |
| 0 | L03211 | Cellulitis of face                                                               |
| 0 | L03221 | Cellulitis of neck                                                               |
| 0 | L03314 | Cellulitis of groin                                                              |
| 0 | L089   | Local infection of the skin and subcutaneous tissue, unspecified                 |
| 0 | L2389  | Allergic contact dermatitis due to other agents                                  |
| 0 | L2489  | Irritant contact dermatitis due to other agents                                  |
| 0 | L249   | Irritant contact dermatitis, unspecified cause                                   |
| 0 | L298   | Other pruritus                                                                   |
| 0 | L299   | Pruritus, unspecified                                                            |
| 0 | L304   | Erythema intertrigo                                                              |
| 0 | L308   | Other specified dermatitis                                                       |
| 0 | L508   | Other urticaria                                                                  |
| 0 | L509   | Urticaria, unspecified                                                           |
| 0 | L539   | Erythematous condition, unspecified                                              |
| 0 | L659   | Nonscarring hair loss, unspecified                                               |
| 0 | L680   | Hirsutism                                                                        |
| 0 | L732   | Hidradenitis suppurativa                                                         |
| 0 | L738   | Other specified follicular disorders                                             |
| 0 | L89899 | Pressure ulcer of other site, unspecified stage                                  |
| 0 | L923   | Foreign body granuloma of the skin and subcutaneous tissue                       |
| 0 | L97519 | Non-pressure chronic ulcer of other part of right foot with unspecified severity |
| 0 | L98419 | Non-pressure chronic ulcer of buttock with unspecified severity                  |
| 0 | M205X2 | Other deformities of toe(s) (acquired), left foot                                |
| 0 | M2100  | Valgus deformity, not elsewhere classified, unspecified site                     |
| 0 | M21372 | Foot drop, left foot                                                             |
| 0 | M2141  | Flat foot [pes planus] (acquired), right foot                                    |
| 0 | M21869 | Other specified acquired deformities of unspecified lower leg                    |
| 0 | M21941 | Unspecified acquired deformity of hand, right hand                               |
| 0 | M238X1 | Other internal derangements of right knee                                        |
| 0 | M238X2 | Other internal derangements of left knee                                         |
| 0 | M24351 | Pathological dislocation of right hip, not elsewhere classified                  |
| 0 | M24352 | Pathological dislocation of left hip, not elsewhere classified                   |
| 0 | M24549 | Contracture, unspecified hand                                                    |
| 0 | M24576 | Contracture, unspecified foot                                                    |
| 0 | M24852 | Other specific joint derangements of left hip, not elsewhere classified          |
| 0 | M264   | Malocclusion, unspecified                                                        |

|   |         |                                                                                            |
|---|---------|--------------------------------------------------------------------------------------------|
| 0 | M311    | Thrombotic microangiopathy                                                                 |
| 0 | M40209  | Unspecified kyphosis, site unspecified                                                     |
| 0 | M40294  | Other kyphosis, thoracic region                                                            |
| 0 | M4143   | Neuromuscular scoliosis, cervicothoracic region                                            |
| 0 | M4144   | Neuromuscular scoliosis, thoracic region                                                   |
| 0 | M4150   | Other secondary scoliosis, site unspecified                                                |
| 0 | M4154   | Other secondary scoliosis, thoracic region                                                 |
| 0 | M4180   | Other forms of scoliosis, site unspecified                                                 |
| 0 | M542    | Cervicalgia                                                                                |
| 0 | M5432   | Sciatica, left side                                                                        |
| 0 | M60061  | Infective myositis, right lower leg                                                        |
| 0 | M60062  | Infective myositis, left lower leg                                                         |
| 0 | M6250   | Muscle wasting and atrophy, not elsewhere classified, unspecified site                     |
| 0 | M6282   | Rhabdomyolysis                                                                             |
| 0 | M6284   | Sarcopenia                                                                                 |
| 0 | M79602  | Pain in left arm                                                                           |
| 0 | M79661  | Pain in right lower leg                                                                    |
| 0 | M79662  | Pain in left lower leg                                                                     |
| 0 | M8000XA | Age-related osteoporosis with current pathological fracture, unspecified site, initial enc |
| 0 | M818    | Other osteoporosis without current pathological fracture                                   |
| 0 | M8588   | Other specified disorders of bone density and structure, other site                        |
| 0 | M898X9  | Other specified disorders of bone, unspecified site                                        |
| 0 | M899    | Disorder of bone, unspecified                                                              |
| 0 | N132    | Hydronephrosis with renal and ureteral calculous obstruction                               |
| 0 | N136    | Pyonephrosis                                                                               |
| 0 | N170    | Acute kidney failure with tubular necrosis                                                 |
| 0 | N178    | Other acute kidney failure                                                                 |
| 0 | N19     | Unspecified kidney failure                                                                 |
| 0 | N433    | Hydrocele, unspecified                                                                     |
| 0 | N471    | Phimosis                                                                                   |
| 0 | N476    | Balanoposthitis                                                                            |
| 0 | N478    | Other disorders of prepuce                                                                 |
| 0 | N481    | Balanitis                                                                                  |
| 0 | N760    | Acute vaginitis                                                                            |
| 0 | N920    | Excessive and frequent menstruation with regular cycle                                     |
| 0 | N9489   | Other specified conditions associated with female genital organs and menstrual cycle       |
| 0 | O26893  | Other specified pregnancy related conditions, third trimester                              |
| 0 | O3413   | Maternal care for benign tumor of corpus uteri, third trimester                            |

|   |        |                                                                              |
|---|--------|------------------------------------------------------------------------------|
| 0 | O700   | First degree perineal laceration during delivery                             |
| 0 | O703   | Fourth degree perineal laceration during delivery                            |
| 0 | O76    | Abnormality in fetal heart rate and rhythm complicating labor and delivery   |
| 0 | O9902  | Anemia complicating childbirth                                               |
| 0 | O99334 | Smoking (tobacco) complicating childbirth                                    |
| 0 | O99354 | Diseases of the nervous system complicating childbirth                       |
| 0 | O9952  | Diseases of the respiratory system complicating childbirth                   |
| 0 | O99824 | Streptococcus B carrier state complicating childbirth                        |
| 0 | P042   | Newborn affected by maternal use of tobacco                                  |
| 0 | P0718  | Other low birth weight newborn, 2000-2499 grams                              |
| 0 | P0730  | Preterm newborn, unspecified weeks of gestation                              |
| 0 | P0735  | Preterm newborn, gestational age 32 completed weeks                          |
| 0 | P0738  | Preterm newborn, gestational age 35 completed weeks                          |
| 0 | P229   | Respiratory distress of newborn, unspecified                                 |
| 0 | P278   | Other chronic respiratory diseases originating in the perinatal period       |
| 0 | P2810  | Unspecified atelectasis of newborn                                           |
| 0 | P284   | Other apnea of newborn                                                       |
| 0 | P2912  | Neonatal bradycardia                                                         |
| 0 | P393   | Neonatal urinary tract infection                                             |
| 0 | P520   | Intraventricular (nontraumatic) hemorrhage, grade 1, of newborn              |
| 0 | P612   | Anemia of prematurity                                                        |
| 0 | P704   | Other neonatal hypoglycemia                                                  |
| 0 | P834   | Breast engorgement of newborn                                                |
| 0 | P8388  | Other specified conditions of integument specific to newborn                 |
| 0 | P84    | Other problems with newborn                                                  |
| 0 | P912   | Neonatal cerebral leukomalacia                                               |
| 0 | P9160  | Hypoxic ischemic encephalopathy [HIE], unspecified                           |
| 0 | P928   | Other feeding problems of newborn                                            |
| 0 | P9681  | Exposure to (parental) (environmental) tobacco smoke in the perinatal period |
| 0 | Q046   | Congenital cerebral cysts                                                    |
| 0 | Q0700  | Arnold-Chiari syndrome without spina bifida or hydrocephalus                 |
| 0 | Q189   | Congenital malformation of face and neck, unspecified                        |
| 0 | Q210   | Ventricular septal defect                                                    |
| 0 | Q245   | Malformation of coronary vessels                                             |
| 0 | Q248   | Other specified congenital malformations of heart                            |
| 0 | Q442   | Atresia of bile ducts                                                        |
| 0 | Q443   | Congenital stenosis and stricture of bile ducts                              |
| 0 | Q630   | Accessory kidney                                                             |

|   |         |                                                                                      |
|---|---------|--------------------------------------------------------------------------------------|
| 0 | Q6502   | Congenital dislocation of left hip, unilateral                                       |
| 0 | Q656    | Congenital unstable hip                                                              |
| 0 | Q6651   | Congenital pes planus, right foot                                                    |
| 0 | Q6652   | Congenital pes planus, left foot                                                     |
| 0 | Q675    | Congenital deformity of spine                                                        |
| 0 | Q742    | Other congenital malformations of lower limb(s), including pelvic girdle             |
| 0 | Q860    | Fetal alcohol syndrome (dysmorphic)                                                  |
| 0 | Q8901   | Asplenia (congenital)                                                                |
| 0 | Q898    | Other specified congenital malformations                                             |
| 0 | Q992    | Fragile X chromosome                                                                 |
| 0 | R040    | Epistaxis                                                                            |
| 0 | R0602   | Shortness of breath                                                                  |
| 0 | R0609   | Other forms of dyspnea                                                               |
| 0 | R0989   | Other specified symptoms and signs involving the circulatory and respiratory systems |
| 0 | R1111   | Vomiting without nausea                                                              |
| 0 | R1112   | Projectile vomiting                                                                  |
| 0 | R1311   | Dysphagia, oral phase                                                                |
| 0 | R1313   | Dysphagia, pharyngeal phase                                                          |
| 0 | R1314   | Dysphagia, pharyngoesophageal phase                                                  |
| 0 | R140    | Abdominal distension (gaseous)                                                       |
| 0 | R161    | Splenomegaly, not elsewhere classified                                               |
| 0 | R17     | Unspecified jaundice                                                                 |
| 0 | R230    | Cyanosis                                                                             |
| 0 | R231    | Pallor                                                                               |
| 0 | R233    | Spontaneous ecchymoses                                                               |
| 0 | R2681   | Unsteadiness on feet                                                                 |
| 0 | R279    | Unspecified lack of coordination                                                     |
| 0 | R292    | Abnormal reflex                                                                      |
| 0 | R29810  | Facial weakness                                                                      |
| 0 | R319    | Hematuria, unspecified                                                               |
| 0 | R32     | Unspecified urinary incontinence                                                     |
| 0 | R3915   | Urgency of urination                                                                 |
| 0 | R402433 | Glasgow coma scale score 3-8, at hospital admission                                  |
| 0 | R403    | Persistent vegetative state                                                          |
| 0 | R456    | Violent behavior                                                                     |
| 0 | R4689   | Other symptoms and signs involving appearance and behavior                           |
| 0 | R4701   | Aphasia                                                                              |
| 0 | R4781   | Slurred speech                                                                       |

|   |         |                                                                                             |
|---|---------|---------------------------------------------------------------------------------------------|
| 0 | R5081   | Fever presenting with conditions classified elsewhere                                       |
| 0 | R5381   | Other malaise                                                                               |
| 0 | R5601   | Complex febrile convulsions                                                                 |
| 0 | R58     | Hemorrhage, not elsewhere classified                                                        |
| 0 | R601    | Generalized edema                                                                           |
| 0 | R609    | Edema, unspecified                                                                          |
| 0 | R61     | Generalized hyperhidrosis                                                                   |
| 0 | R630    | Anorexia                                                                                    |
| 0 | R636    | Underweight                                                                                 |
| 0 | R739    | Hyperglycemia, unspecified                                                                  |
| 0 | R7989   | Other specified abnormal findings of blood chemistry                                        |
| 0 | R899    | Unspecified abnormal finding in specimens from other organs, systems and tissues            |
| 0 | R9082   | White matter disease, unspecified                                                           |
| 0 | R932    | Abnormal findings on diagnostic imaging of liver and biliary tract                          |
| 0 | R9341   | Abnormal radiologic findings on diagnostic imaging of renal pelvis, ureter, or bladder      |
| 0 | R938    | Abnormal findings on diagnostic imaging of other specified body structures                  |
| 0 | R9409   | Abnormal results of other function studies of central nervous system                        |
| 0 | S0001XA | Abrasion of scalp, initial encounter                                                        |
| 0 | S00431A | Contusion of right ear, initial encounter                                                   |
| 0 | S020XXA | Fracture of vault of skull, initial encounter for closed fracture                           |
| 0 | S060X0A | Concussion without loss of consciousness, initial encounter                                 |
| 0 | S0990XA | Unspecified injury of head, initial encounter                                               |
| 0 | S143XXA | Injury of brachial plexus, initial encounter                                                |
| 0 | S20229A | Contusion of unspecified back wall of thorax, initial encounter                             |
| 0 | S72302A | Unspecified fracture of shaft of left femur, initial encounter for closed fracture          |
| 0 | S72322D | Displaced transverse fracture of shaft of left femur, subsequent encounter for closed fr    |
| 0 | S72402A | Unspecified fracture of lower end of left femur, initial encounter for closed fracture      |
| 0 | S72471A | Torus fracture of lower end of right femur, initial encounter for closed fracture           |
| 0 | S72492A | Other fracture of lower end of left femur, initial encounter for closed fracture            |
| 0 | S7290XD | Unspecified fracture of unspecified femur, subsequent encounter for closed fracture wi      |
| 0 | S73002S | Unspecified subluxation of left hip, sequela                                                |
| 0 | S73004A | Unspecified dislocation of right hip, initial encounter                                     |
| 0 | S73005A | Unspecified dislocation of left hip, initial encounter                                      |
| 0 | S75001A | Unspecified injury of femoral artery, right leg, initial encounter                          |
| 0 | S99912A | Unspecified injury of left ankle, initial encounter                                         |
| 0 | T17300A | Unspecified foreign body in larynx causing asphyxiation, initial encounter                  |
| 0 | T17890A | Other foreign object in other parts of respiratory tract causing asphyxiation, initial enco |
| 0 | T17920A | Food in respiratory tract, part unspecified causing asphyxiation, initial encounter         |

|   |         |                                                                                             |
|---|---------|---------------------------------------------------------------------------------------------|
| 0 | T3695XA | Adverse effect of unspecified systemic antibiotic, initial encounter                        |
| 0 | T370X5A | Adverse effect of sulfonamides, initial encounter                                           |
| 0 | T380X5D | Adverse effect of glucocorticoids and synthetic analogues, subsequent encounter             |
| 0 | T39395A | Adverse effect of other nonsteroidal anti-inflammatory drugs [NSAID], initial encounter     |
| 0 | T407X1A | Poisoning by cannabis (derivatives), accidental (unintentional), initial encounter          |
| 0 | T424X1A | Poisoning by benzodiazepines, accidental (unintentional), initial encounter                 |
| 0 | T426X5A | Adverse effect of other antiepileptic and sedative-hypnotic drugs, initial encounter        |
| 0 | T428X1A | Poisoning by antiparkinsonism drugs and other central muscle-tone depressants, acci         |
| 0 | T428X5A | Adverse effect of antiparkinsonism drugs and other central muscle-tone depressants, i       |
| 0 | T443X5A | Adverse effect of other parasympatholytics [anticholinergics and antimuscarinics] and s     |
| 0 | T45525A | Adverse effect of antithrombotic drugs, initial encounter                                   |
| 0 | T490X5A | Adverse effect of local antifungal, anti-infective and anti-inflammatory drugs, initial enc |
| 0 | T502X5A | Adverse effect of carbonic-anhydrase inhibitors, benzothiadiazides and other diuretics,     |
| 0 | T50901A | Poisoning by unspecified drugs, medicaments and biological substances, accidental (u        |
| 0 | T50905A | Adverse effect of unspecified drugs, medicaments and biological substances, initial en      |
| 0 | T50Z15A | Adverse effect of immunoglobulin, initial encounter                                         |
| 0 | T7402XA | Child neglect or abandonment, confirmed, initial encounter                                  |
| 0 | T7612XA | Child physical abuse, suspected, initial encounter                                          |
| 0 | T7840XA | Allergy, unspecified, initial encounter                                                     |
| 0 | T80218A | Other infection due to central venous catheter, initial encounter                           |
| 0 | T80219D | Unspecified infection due to central venous catheter, subsequent encounter                  |
| 0 | T8051XA | Anaphylactic reaction due to administration of blood and blood products, initial encoun     |
| 0 | T8089XA | Other complications following infusion, transfusion and therapeutic injection, initial enc  |
| 0 | T8132XA | Disruption of internal operation (surgical) wound, not elsewhere classified, initial encou  |
| 0 | T8241XA | Breakdown (mechanical) of vascular dialysis catheter, initial encounter                     |
| 0 | T82524A | Displacement of infusion catheter, initial encounter                                        |
| 0 | T82594A | Other mechanical complication of infusion catheter, initial encounter                       |
| 0 | T82598A | Other mechanical complication of other cardiac and vascular devices and implants, ini       |
| 0 | T827XXA | Infection and inflammatory reaction due to other cardiac and vascular devices, implant      |
| 0 | T82838A | Hemorrhage due to vascular prosthetic devices, implants and grafts, initial encounter       |
| 0 | T82898A | Other specified complication of vascular prosthetic devices, implants and grafts, initial   |
| 0 | T829XXA | Unspecified complication of cardiac and vascular prosthetic device, implant and graft, i    |
| 0 | T83511A | Infection and inflammatory reaction due to indwelling urethral catheter, initial encounte   |
| 0 | T8489XA | Other specified complication of internal orthopedic prosthetic devices, implants and gra    |
| 0 | T85528A | Displacement of other gastrointestinal prosthetic devices, implants and grafts, initial en  |
| 0 | T85848A | Pain due to other internal prosthetic devices, implants and grafts, initial encounter       |
| 0 | T85868A | Thrombosis due to other internal prosthetic devices, implants and grafts, initial encoun    |
| 0 | T859XXA | Unspecified complication of internal prosthetic device, implant and graft, initial encount  |



|   |         |                                                                                                                                                                                            |
|---|---------|--------------------------------------------------------------------------------------------------------------------------------------------------------------------------------------------|
| 0 | T881XXA | Other complications following immunization, not elsewhere classified, initial encounter                                                                                                    |
| 0 | T886XXA | Anaphylactic reaction due to adverse effect of correct drug or medicament properly administered                                                                                            |
| 0 | V180XXA | Pedal cycle driver injured in noncollision transport accident in nontraffic accident, initial encounter                                                                                    |
| 0 | W010XXA | Fall on same level from slipping, tripping and stumbling without subsequent striking against object                                                                                        |
| 0 | W08XXXA | Fall from other furniture, initial encounter                                                                                                                                               |
| 0 | W1789XA | Other fall from one level to another, initial encounter                                                                                                                                    |
| 0 | W1839XA | Other fall on same level, initial encounter                                                                                                                                                |
| 0 | W228XXA | Striking against or struck by other objects, initial encounter                                                                                                                             |
| 0 | X501XXA | Overexertion from prolonged static or awkward postures, initial encounter                                                                                                                  |
| 0 | Y658    | Other specified misadventures during surgical and medical care                                                                                                                             |
| 0 | Y732    | Prosthetic and other implants, materials and accessory gastroenterology and urology conditions                                                                                             |
| 0 | Y828    | Other medical devices associated with adverse incidents                                                                                                                                    |
| 0 | Y831    | Surgical operation with implant of artificial internal device as the cause of abnormal reaction of the patient, or of later complication, without infection of incision, initial encounter |
| 0 | Y839    | Surgical procedure, unspecified as the cause of abnormal reaction of the patient, or of later complication, without infection of incision, initial encounter                               |
| 0 | Y846    | Urinary catheterization as the cause of abnormal reaction of the patient, or of later complication, without infection of incision, initial encounter                                       |
| 0 | Y849    | Medical procedure, unspecified as the cause of abnormal reaction of the patient, or of later complication, without infection of incision, initial encounter                                |
| 0 | Y92000  | Kitchen of unspecified non-institutional (private) residence as the place of occurrence of the external cause                                                                              |
| 0 | Y92019  | Unspecified place in single-family (private) house as the place of occurrence of the external cause                                                                                        |
| 0 | Y92234  | Operating room of hospital as the place of occurrence of the external cause                                                                                                                |
| 0 | Y9302   | Activity, running                                                                                                                                                                          |
| 0 | Y9355   | Activity, bike riding                                                                                                                                                                      |
| 0 | Y93F2   | Activity, caregiving, lifting                                                                                                                                                              |
| 0 | Y998    | Other external cause status                                                                                                                                                                |
| 0 | Z005    | Encounter for examination of potential donor of organ and tissue                                                                                                                           |
| 0 | Z01110  | Encounter for hearing examination following failed hearing screening                                                                                                                       |
| 0 | Z0120   | Encounter for dental examination and cleaning without abnormal findings                                                                                                                    |
| 0 | Z0189   | Encounter for other specified special examinations                                                                                                                                         |
| 0 | Z0472   | Encounter for examination and observation following alleged child physical abuse                                                                                                           |
| 0 | Z1342   | Encounter for screening for global developmental delays (milestones)                                                                                                                       |
| 0 | Z135    | Encounter for screening for eye and ear disorders                                                                                                                                          |
| 0 | Z136    | Encounter for screening for cardiovascular disorders                                                                                                                                       |
| 0 | Z1389   | Encounter for screening for other disorder                                                                                                                                                 |
| 0 | Z148    | Genetic carrier of other disease                                                                                                                                                           |
| 0 | Z1611   | Resistance to penicillins                                                                                                                                                                  |
| 0 | Z20828  | Contact with and (suspected) exposure to other viral communicable diseases                                                                                                                 |
| 0 | Z209    | Contact with and (suspected) exposure to unspecified communicable disease                                                                                                                  |
| 0 | Z228    | Carrier of other infectious diseases                                                                                                                                                       |
| 0 | Z4582   | Encounter for adjustment or removal of myringotomy device (stent) (tube)                                                                                                                   |

|   |        |                                                                                            |
|---|--------|--------------------------------------------------------------------------------------------|
| 0 | Z5112  | Encounter for antineoplastic immunotherapy                                                 |
| 0 | Z5321  | Procedure and treatment not carried out due to patient leaving prior to being seen by h    |
| 0 | Z638   | Other specified problems related to primary support group                                  |
| 0 | Z658   | Other specified problems related to psychosocial circumstances                             |
| 0 | Z6791  | Unspecified blood type, Rh negative                                                        |
| 0 | Z72820 | Sleep deprivation                                                                          |
| 0 | Z732   | Lack of relaxation and leisure                                                             |
| 0 | Z7401  | Bed confinement status                                                                     |
| 0 | Z7409  | Other reduced mobility                                                                     |
| 0 | Z7721  | Contact with and (suspected) exposure to potentially hazardous body fluids                 |
| 0 | Z79891 | Long term (current) use of opiate analgesic                                                |
| 0 | Z803   | Family history of malignant neoplasm of breast                                             |
| 0 | Z823   | Family history of stroke                                                                   |
| 0 | Z8261  | Family history of arthritis                                                                |
| 0 | Z8279  | Family history of other congenital malformations, deformations and chromosomal abnc        |
| 0 | Z831   | Family history of other infectious and parasitic diseases                                  |
| 0 | Z859   | Personal history of malignant neoplasm, unspecified                                        |
| 0 | Z8614  | Personal history of Methicillin resistant Staphylococcus aureus infection                  |
| 0 | Z862   | Personal history of diseases of the blood and blood-forming organs and certain disord      |
| 0 | Z8673  | Personal history of transient ischemic attack (TIA), and cerebral infarction without resic |
| 0 | Z872   | Personal history of diseases of the skin and subcutaneous tissue                           |
| 0 | Z87442 | Personal history of urinary calculi                                                        |
| 0 | Z8776  | Personal history of (corrected) congenital malformations of integument, limbs and mus      |
| 0 | Z9049  | Acquired absence of other specified parts of digestive tract                               |
| 0 | Z91011 | Allergy to milk products                                                                   |
| 0 | Z91048 | Other nonmedicinal substance allergy status                                                |
| 0 | Z9111  | Patient's noncompliance with dietary regimen                                               |
| 0 | Z9119  | Patient's noncompliance with other medical treatment and regimen                           |
| 0 | Z9181  | History of falling                                                                         |
| 0 | Z9350  | Unspecified cystostomy status                                                              |
| 0 | Z9622  | Myringotomy tube(s) status                                                                 |
| 9 | 00845  | Intestinal infection due to Clostridium difficile                                          |
| 9 | 00861  | Enteritis due to Rotavirus                                                                 |
| 9 | 0319   | Unspecified diseases due to mycobacteria                                                   |
| 9 | 03849  | Other septicemia due to gram-negative organisms                                            |
| 9 | 04104  | Bacterial infection due to Streptococcus, group D [Enterococcus]                           |
| 9 | 04119  | Bacterial infection due to other Staphylococcus                                            |
| 9 | 0413   | Klebsiella pneumoniae infection in conditions classified elsewhere and of unspecified s    |

|   |       |                                                                                          |
|---|-------|------------------------------------------------------------------------------------------|
| 9 | 0416  | Proteus (mirabilis) (morganii) infection in conditions classified elsewhere and of unsp  |
| 9 | 0579  | Viral exanthem, unspecified                                                              |
| 9 | 0785  | Cytomegaloviral disease                                                                  |
| 9 | 0796  | Respiratory syncytial virus (RSV) infection in conditions classified elsewhere and of un |
| 9 | 11289 | Other candidiasis of other specified sites                                               |
| 9 | 2639  | Unspecified protein-calorie malnutrition                                                 |
| 9 | 2689  | Unspecified vitamin D deficiency                                                         |
| 9 | 2699  | Unspecified nutritional deficiency                                                       |
| 9 | 2760  | Hyperosmolality and/or hypernatremia                                                     |
| 9 | 2767  | Hyperpotassemia                                                                          |
| 9 | 2774  | Disorders of bilirubin excretion                                                         |
| 9 | 27787 | Disorders of mitochondrial metabolism                                                    |
| 9 | 2779  | Unspecified disorder of metabolism                                                       |
| 9 | 27952 | Chronic graft-versus-host disease                                                        |
| 9 | 2809  | Iron deficiency anemia, unspecified                                                      |
| 9 | 2848  | Not Defined                                                                              |
| 9 | 2849  | Aplastic anemia, unspecified                                                             |
| 9 | 2859  | Anemia, unspecified                                                                      |
| 9 | 2869  | Other and unspecified coagulation defects                                                |
| 9 | 28749 | Other secondary thrombocytopenia                                                         |
| 9 | 2875  | Thrombocytopenia, unspecified                                                            |
| 9 | 2880  | Agranulocytosis                                                                          |
| 9 | 2920  | Drug withdrawal                                                                          |
| 9 | 30000 | Anxiety state, unspecified                                                               |
| 9 | 30009 | Other anxiety states                                                                     |
| 9 | 3083  | Other acute reactions to stress                                                          |
| 9 | 31531 | Expressive language disorder                                                             |
| 9 | 31539 | Other developmental speech disorder                                                      |
| 9 | 3301  | Cerebral lipidoses                                                                       |
| 9 | 3314  | Obstructive hydrocephalus                                                                |
| 9 | 3319  | Cerebral degeneration, unspecified                                                       |
| 9 | 33818 | Other acute postoperative pain                                                           |
| 9 | 33819 | Other acute pain                                                                         |
| 9 | 3569  | Unspecified idiopathic peripheral neuropathy                                             |
| 9 | 3589  | Myoneural disorders, unspecified                                                         |
| 9 | 3590  | Congenital hereditary muscular dystrophy                                                 |
| 9 | 36250 | Macular degeneration (senile) of retina, unspecified                                     |
| 9 | 3668  | Other cataract                                                                           |

|   |       |                                                                                       |
|---|-------|---------------------------------------------------------------------------------------|
| 9 | 3670  | Hypermetropia                                                                         |
| 9 | 36720 | Astigmatism, unspecified                                                              |
| 9 | 3688  | Other specified visual disturbances                                                   |
| 9 | 3694  | Legal blindness, as defined in U.S.A.                                                 |
| 9 | 3699  | Unspecified visual loss                                                               |
| 9 | 37034 | Exposure keratoconjunctivitis                                                         |
| 9 | 37230 | Conjunctivitis, unspecified                                                           |
| 9 | 37274 | Vascular abnormalities of conjunctiva                                                 |
| 9 | 37300 | Blepharitis, unspecified                                                              |
| 9 | 37311 | Hordeolum externum                                                                    |
| 9 | 37420 | Lagophthalmos, unspecified                                                            |
| 9 | 37749 | Other disorders of optic nerve                                                        |
| 9 | 37810 | Exotropia, unspecified                                                                |
| 9 | 37820 | Intermittent heterotropia, unspecified                                                |
| 9 | 37872 | Progressive external ophthalmoplegia                                                  |
| 9 | 37919 | Other scleral disorders                                                               |
| 9 | 37950 | Nystagmus, unspecified                                                                |
| 9 | 38010 | Infective otitis externa, unspecified                                                 |
| 9 | 3814  | Nonsuppurative otitis media, not specified as acute or chronic                        |
| 9 | 4240  | Mitral valve disorders                                                                |
| 9 | 42822 | Chronic systolic heart failure                                                        |
| 9 | 4329  | Unspecified intracranial hemorrhage                                                   |
| 9 | 4589  | Hypotension, unspecified                                                              |
| 9 | 4720  | Chronic rhinitis                                                                      |
| 9 | 4739  | Unspecified sinusitis (chronic)                                                       |
| 9 | 47412 | Hypertrophy of adenoids alone                                                         |
| 9 | 4778  | Allergic rhinitis due to other allergen                                               |
| 9 | 47874 | Stenosis of larynx                                                                    |
| 9 | 4808  | Pneumonia due to other virus not elsewhere classified                                 |
| 9 | 4870  | Influenza with pneumonia                                                              |
| 9 | 4881  | Influenza due to identified novel H1N1 influenza virus                                |
| 9 | 490   | Bronchitis, not specified as acute or chronic                                         |
| 9 | 496   | Chronic airway obstruction, not elsewhere classified                                  |
| 9 | 51852 | Other pulmonary insufficiency, not elsewhere classified, following trauma and surgery |
| 9 | 51902 | Mechanical complication of tracheostomy                                               |
| 9 | 5198  | Other diseases of respiratory system, not elsewhere classified                        |
| 9 | 5206  | Disturbances in tooth eruption                                                        |
| 9 | 5225  | Periapical abscess without sinus                                                      |

|   |       |                                                                |
|---|-------|----------------------------------------------------------------|
| 9 | 52310 | Chronic gingivitis, plaque induced                             |
| 9 | 5238  | Other specified periodontal diseases                           |
| 9 | 52802 | Mucositis (ulcerative) due to other drugs                      |
| 9 | 5298  | Other specified conditions of the tongue                       |
| 9 | 53551 | Unspecified gastritis and gastroduodenitis, with hemorrhage    |
| 9 | 5363  | Gastroparesis                                                  |
| 9 | 53641 | Infection of gastrostomy                                       |
| 9 | 5368  | Dyspepsia and other specified disorders of function of stomach |
| 9 | 56962 | Mechanical complication of colostomy and enterostomy           |
| 9 | 5849  | Acute kidney failure, unspecified                              |
| 9 | 59689 | Other specified disorders of bladder                           |
| 9 | 59970 | Hematuria, unspecified                                         |
| 9 | 6071  | Balanoposthitis                                                |
| 9 | 6869  | Unspecified local infection of skin and subcutaneous tissue    |
| 9 | 6908  | Other erythematous squamous dermatosis                         |
| 9 | 6959  | Unspecified erythematous condition                             |
| 9 | 7015  | Other abnormal granulation tissue                              |
| 9 | 7098  | Other specified disorders of skin                              |
| 9 | 71845 | Contracture of joint of pelvic region and thigh                |
| 9 | 71846 | Contracture of lower leg joint                                 |
| 9 | 71847 | Contracture of ankle and foot joint                            |
| 9 | 71848 | Contracture of joint of other specified sites                  |
| 9 | 71875 | Developmental dislocation of joint, pelvic region and thigh    |
| 9 | 71945 | Pain in joint, pelvic region and thigh                         |
| 9 | 7245  | Backache, unspecified                                          |
| 9 | 72781 | Contracture of tendon (sheath)                                 |
| 9 | 72889 | Other disorder of muscle, ligament, and fascia                 |
| 9 | 73679 | Other acquired deformities of ankle and foot                   |
| 9 | 7422  | Congenital reduction deformities of brain                      |
| 9 | 75431 | Congenital dislocation of hip, bilateral                       |
| 9 | 75432 | Congenital subluxation of hip, unilateral                      |
| 9 | 75482 | Pectus carinatum                                               |
| 9 | 75619 | Other congenital anomalies of spine                            |
| 9 | 75733 | Congenital pigmentary anomalies of skin                        |
| 9 | 7585  | Other conditions due to autosomal anomalies                    |
| 9 | 7707  | Chronic respiratory disease arising in the perinatal period    |
| 9 | 78050 | Unspecified sleep disturbance                                  |
| 9 | 78079 | Other malaise and fatigue                                      |

|   |       |                                                                                          |
|---|-------|------------------------------------------------------------------------------------------|
| 9 | 78091 | Fussy infant (baby)                                                                      |
| 9 | 7812  | Abnormality of gait                                                                      |
| 9 | 7823  | Edema                                                                                    |
| 9 | 7824  | Jaundice, unspecified, not of newborn                                                    |
| 9 | 7831  | Abnormal weight gain                                                                     |
| 9 | 7843  | Aphasia                                                                                  |
| 9 | 7845  | Other speech disturbance                                                                 |
| 9 | 78451 | Dysarthria                                                                               |
| 9 | 78459 | Speech disturbance NEC                                                                   |
| 9 | 7847  | Epistaxis                                                                                |
| 9 | 78551 | Cardiogenic shock                                                                        |
| 9 | 78600 | Respiratory abnormality, unspecified                                                     |
| 9 | 78606 | Tachypnea                                                                                |
| 9 | 78701 | Nausea with vomiting                                                                     |
| 9 | 7872  | Dysphagia                                                                                |
| 9 | 78721 | Dysphagia, oral phase                                                                    |
| 9 | 78723 | Dysphagia, pharyngeal phase                                                              |
| 9 | 78820 | Retention of urine, unspecified                                                          |
| 9 | 7905  | Other nonspecific abnormal serum enzyme levels                                           |
| 9 | 79091 | Abnormal arterial blood gases                                                            |
| 9 | 7919  | Other nonspecific findings on examination of urine                                       |
| 9 | 79402 | Nonspecific abnormal electroencephalogram [EEG]                                          |
| 9 | 79409 | Other nonspecific abnormal results of function study of brain and central nervous system |
| 9 | 79431 | Nonspecific abnormal electrocardiogram [ECG] [EKG]                                       |
| 9 | 84500 | Unspecified site of ankle sprain and strain                                              |
| 9 | 87342 | Open wound of forehead, without mention of complication                                  |
| 9 | 8830  | Open wound of finger(s), without mention of complication                                 |
| 9 | 920   | Contusion of face, scalp, and neck except eye(s)                                         |
| 9 | 95901 | Head injury, unspecified                                                                 |
| 9 | 9752  | Poisoning by skeletal muscle relaxants                                                   |
| 9 | 99591 | Sepsis                                                                                   |
| 9 | 99662 | Infection and inflammatory reaction due to other vascular device, implant, and graft     |
| 9 | 99688 | Complications of transplanted organ, stem cell                                           |
| 9 | 99731 | Ventilator associated pneumonia                                                          |
| 9 | 99883 | Non-healing surgical wound                                                               |
| 9 | 99889 | Other specified complications of procedures                                              |
| 9 | 99932 | Bloodstream infection due to central venous catheter                                     |
| 9 | 99933 | Local infection due to central venous catheter                                           |

|   |         |                                                                                            |
|---|---------|--------------------------------------------------------------------------------------------|
| 9 | 9998    | Not Defined                                                                                |
| 9 | 9-E0008 | Other external cause status                                                                |
| 9 | 9-E0299 | Other activity                                                                             |
| 9 | 9-E8490 | Place of occurrence, home                                                                  |
| 9 | 9-E8496 | Place of occurrence, public building                                                       |
| 9 | 9-E8499 | Place of occurrence, unspecified place                                                     |
| 9 | 9-E8586 | Accidental poisoning by agents primarily acting on the smooth and skeletal muscles ar      |
| 9 | 9-E8780 | Surgical operation with transplant of whole organ causing abnormal patient reaction, o     |
| 9 | 9-E8788 | Other specified surgical operations and procedures causing abnormal patient reaction,      |
| 9 | 9-E8789 | Unspecified surgical operations and procedures causing abnormal patient reaction, or       |
| 9 | 9-E8845 | Accidental fall from other furniture                                                       |
| 9 | 9-E8849 | Other accidental fall from one level to another                                            |
| 9 | 9-E8889 | Unspecified fall                                                                           |
| 9 | 9-E9208 | Accidents caused by other specified cutting and piercing instruments or objects            |
| 9 | 9-E9300 | Penicillins causing adverse effects in therapeutic use                                     |
| 9 | 9-E9305 | Cephalosporin group causing adverse effects in therapeutic use                             |
| 9 | 9-E9309 | Unspecified antibiotic causing adverse effects in therapeutic use                          |
| 9 | 9-E9320 | Adrenal cortical steroids causing adverse effects in therapeutic use                       |
| 9 | V0381   | Need for prophylactic vaccination against Hemophilus influenza, type B [HIB]               |
| 9 | V054    | Need for prophylactic vaccination and inoculation against varicella                        |
| 9 | V063    | Need for prophylactic vaccination and inoculation against diphtheria-tetanus- pertussis    |
| 9 | V064    | Need for prophylactic vaccination and inoculation against measles-mumps-rubella [MM        |
| 9 | V068    | Need for prophylactic vaccination and inoculation against other combinations of diseas     |
| 9 | V1209   | Personal history of other specified infectious and parasitic disease                       |
| 9 | V1254   | Personal history of transient ischemic attack (TIA), and cerebral infarction without resic |
| 9 | V1365   | Personal history of (corrected) congenital malformations of heart and circulatory syste    |
| 9 | V142    | Personal history of allergy to sulfonamides                                                |
| 9 | V1505   | Personal history of allergy to other foods                                                 |
| 9 | V1507   | Personal history of allergy to latex                                                       |
| 9 | V1529   | Personal history of surgery to other organs                                                |
| 9 | V168    | Family history of other specified malignant neoplasm                                       |
| 9 | V1749   | Family history of other cardiovascular diseases                                            |
| 9 | V183    | Family history of other blood disorders                                                    |
| 9 | V4459   | Other cystostomy status                                                                    |
| 9 | V454    | Arthrodesis status                                                                         |
| 9 | V4579   | Other acquired absence of organ                                                            |
| 9 | V463    | Wheelchair dependence                                                                      |
| 9 | V4984   | Bed confinement status                                                                     |

|   |       |                                                                     |
|---|-------|---------------------------------------------------------------------|
| 9 | V5844 | Aftercare following organ transplant                                |
| 9 | V5876 | Aftercare following surgery of the genitourinary system, NEC        |
| 9 | V643  | Procedure not carried out for other reasons                         |
| 9 | V6889 | Encounters for other specified administrative purpose               |
| 9 | V717  | Observation for suspected cardiovascular disease                    |
| 9 | V7189 | Observation and evaluation for other specified suspected conditions |
| 9 | V7283 | Other specified pre-operative examination                           |
| 9 | V7284 | Pre-operative examination, unspecified                              |
| 9 | V781  | Special screening for other and unspecified deficiency anemia       |



| Dx Abbr Title (ICD)                              | N Visits | N Patients |
|--------------------------------------------------|----------|------------|
| Krabbe disease                                   | 540      | 126        |
| Leukodystrophy                                   | 210      | 24         |
| Gastrostomy status                               | 203      | 48         |
| Lack expected normal physio develop in child NOS | 146      | 46         |
| Feeding difficulties                             | 99       | 44         |
| Epilepsy NOS not intract w/o status epilepticus  | 94       | 30         |
| Gastro-esophageal reflux disease w/o esophagitis | 93       | 37         |
| Gastrostomy status                               | 86       | 12         |
| Disorders psychological development NEC          | 82       | 32         |
| Sphingolipidosis NEC                             | 81       | 26         |
| Failure to thrive                                | 79       | 40         |
| Long term drug therapy NEC                       | 69       | 36         |
| Bone marrow transplant status                    | 64       | 26         |
| Constipation NOS                                 | 63       | 34         |
| Dysphagia NOS                                    | 51       | 29         |
| Tracheostomy status                              | 51       | 4          |
| Acute upper respiratory infection NOS            | 50       | 25         |
| Stem cells transplant status                     | 43       | 25         |
| Encounter for palliative care                    | 42       | 23         |
| Convulsions NOS                                  | 42       | 22         |
| Nonfamilial hypogammaglobulinemia                | 42       | 20         |
| Essential hypertension                           | 42       | 19         |
| Dependence on respirator status                  | 42       | 7          |
| Dehydration                                      | 39       | 27         |
| Dependence on supplemental oxygen                | 38       | 11         |
| Fever NOS                                        | 37       | 25         |
| Lack normal devel NOS                            | 37       | 12         |
| Esophageal reflux                                | 35       | 12         |
| Neuromuscular dysfunction bladder NOS            | 34       | 2          |
| Feeding problem                                  | 33       | 10         |
| Obstructive sleep apnea                          | 32       | 12         |
| Vomiting NOS                                     | 31       | 17         |
| Disorders lung NEC                               | 31       | 8          |
| Personal history urinary infections              | 31       | 6          |
| Viral agents NEC as cause DCE                    | 29       | 17         |
| Quadriplegia NOS                                 | 29       | 8          |
| Acidosis                                         | 27       | 21         |

|                                                 |    |    |
|-------------------------------------------------|----|----|
| Hypomagnesemia                                  | 27 | 14 |
| Epilepsy NOS w/o intract                        | 27 | 8  |
| Encephalopathy NEC                              | 25 | 11 |
| Hypoxemia                                       | 24 | 18 |
| Urinary tract infection site NOS                | 24 | 11 |
| Arthrogryposis multiplex congenita              | 24 | 1  |
| Diarrhea NOS                                    | 23 | 16 |
| Complications stem cell transplant              | 23 | 10 |
| Respirator depend status                        | 23 | 3  |
| Place NOS or not applicable                     | 21 | 13 |
| Pneumonia organism NOS                          | 21 | 11 |
| Asthma NOS uncomplicated                        | 21 | 9  |
| Hypo-osmolality & hyponatremia                  | 21 | 8  |
| Acute tracheitis w/o obstruction                | 21 | 5  |
| Contracture joint NOS                           | 21 | 2  |
| Do not resuscitate                              | 20 | 14 |
| Viral infections NEC site NOS                   | 20 | 13 |
| Anemia NOS                                      | 20 | 9  |
| Abn invol movement NEC                          | 20 | 8  |
| Congenital ptosis                               | 20 | 1  |
| Atelectasis                                     | 19 | 11 |
| Muscle spasm NEC                                | 19 | 7  |
| LRSE & epileptic synd w CPS not intract w/o SE  | 19 | 4  |
| Dependence on wheelchair                        | 19 | 4  |
| Congenital musculoskeletal deformities NEC      | 19 | 2  |
| Adverse effect antineo & immssuppr drug initial | 18 | 16 |
| Disturbances salivary secretion                 | 18 | 11 |
| Dysphagia oropharyngeal phase                   | 18 | 11 |
| Other convulsions                               | 18 | 10 |
| Presence vascular implants & grafts NEC         | 18 | 9  |
| Fever NOS                                       | 18 | 9  |
| Failure to thrive                               | 18 | 9  |
| Scoliosis NOS                                   | 18 | 8  |
| Muscle spasm                                    | 18 | 8  |
| Pneumonitis D/T inhalation food & vomit         | 17 | 13 |
| Cramp & spasm                                   | 17 | 12 |
| Long-term use meds NEC                          | 17 | 8  |
| Allergy status antibiotic agents status NEC     | 17 | 5  |

|                                                  |    |    |
|--------------------------------------------------|----|----|
| Idiopathic scoliosis                             | 17 | 4  |
| Tracheostomy status                              | 17 | 2  |
| Gastrostomy malfunction                          | 16 | 13 |
| Encounter for attention to gastrostomy           | 16 | 13 |
| Tachycardia NOS                                  | 16 | 11 |
| Acute respiratory failure w hypoxia              | 16 | 10 |
| Acute graft-versus-host disease                  | 16 | 9  |
| Contact w & exposure to environ tobacco smoke    | 16 | 8  |
| Pneumonia organism NOS                           | 16 | 6  |
| Acquired absence organs NEC                      | 16 | 2  |
| Dilated cardiomyopathy                           | 16 | 1  |
| Chronic fatigue NOS                              | 16 | 1  |
| Encounter for adjust & manage vasc access device | 15 | 15 |
| Hypokalemia                                      | 15 | 13 |
| Bradycardia NOS                                  | 15 | 13 |
| Viral infection NOS                              | 15 | 11 |
| Acute URI NOS                                    | 15 | 10 |
| Ac respiratory failure                           | 15 | 9  |
| Neutropenia NOS                                  | 15 | 8  |
| Specified respiratory disorders NEC              | 15 | 8  |
| Microcephaly                                     | 15 | 5  |
| Hx drug allergy NEC                              | 15 | 5  |
| Acute & chronic respiratory failure w hypoxia    | 14 | 7  |
| Cutaneous-vesicostomy status                     | 14 | 2  |
| Rash & nonspecific skin eruption NEC             | 13 | 12 |
| Encephalopathy NOS                               | 13 | 11 |
| Long term use systemic steroids                  | 13 | 9  |
| Thrombocytopenia NOS                             | 13 | 8  |
| Specified disorders muscle NEC                   | 13 | 6  |
| Chronic respiratory failure NOS                  | 13 | 5  |
| BM transplant status                             | 13 | 5  |
| Epilepsy NOS intractable w/o status epilepticus  | 13 | 4  |
| Abnormalities gait & mobility NOS                | 13 | 4  |
| Pseudomonas as cause DCE                         | 13 | 3  |
| Both eyes blind-WHO def                          | 13 | 2  |
| Hemoglobinopathies NEC                           | 13 | 1  |
| Acute recurrent streptococcal tonsillitis        | 13 | 1  |
| Hydronephrosis                                   | 13 | 1  |

|                                                  |    |    |
|--------------------------------------------------|----|----|
| Cough                                            | 12 | 11 |
| Atrial septal defect                             | 12 | 9  |
| Constipation NOS                                 | 12 | 9  |
| Delayed milestone childhood                      | 12 | 7  |
| Med px NEC cause abn RXN/later comp w/o misadv   | 12 | 7  |
| Vitamin D deficiency NOS                         | 12 | 6  |
| Artificial opening gastrointest tract status NEC | 12 | 5  |
| Urinary tract INF NOS                            | 12 | 4  |
| Hydronephrosis NOS                               | 12 | 1  |
| Calculus bladder                                 | 12 | 1  |
| Prim cardiomyopathy NEC                          | 12 | 1  |
| Altered mental status NOS                        | 11 | 9  |
| Hypothermia not assoc w low environmental temp   | 11 | 9  |
| Adrenocortical insufficiency NOS                 | 11 | 8  |
| Hyperkalemia                                     | 11 | 8  |
| Diaper dermatitis                                | 11 | 8  |
| Dietary counseling & surveillance                | 11 | 8  |
| Vomiting alone                                   | 11 | 7  |
| Dysphagia NOS                                    | 11 | 7  |
| Intellectual disabilities NOS                    | 11 | 6  |
| Personal history pneumonia                       | 11 | 6  |
| Tachycardia NOS                                  | 11 | 6  |
| Atten to gastrostomy                             | 11 | 5  |
| Abnormal electroencephalogram                    | 11 | 4  |
| Arthrodesis status                               | 11 | 3  |
| Pulmonary collapse                               | 11 | 3  |
| Hx antibio allergy NEC                           | 11 | 3  |
| Asthma NOS                                       | 11 | 2  |
| Irritability & anger                             | 10 | 8  |
| Long term use antibiotics                        | 10 | 8  |
| Abnormalities breathing NEC                      | 10 | 7  |
| Fatigue NEC                                      | 10 | 7  |
| Visual loss NOS                                  | 10 | 6  |
| Development delays NEC                           | 10 | 6  |
| Hx pneumonia                                     | 10 | 6  |
| Umbilical hernia w/o obstruction or gangrene     | 10 | 5  |
| Child in welfare custody                         | 10 | 5  |
| Neuromuscular scoliosis thoracolumbar region     | 10 | 4  |

|                                                  |    |   |
|--------------------------------------------------|----|---|
| Encounter for immunization                       | 10 | 4 |
| Chr respiratory failure                          | 10 | 4 |
| Palliative care                                  | 10 | 4 |
| Severe intellectual disabilities                 | 10 | 3 |
| Dysphagia NEC                                    | 10 | 3 |
| Food/vomit pneumonitis                           | 10 | 3 |
| Other lung disease NEC                           | 10 | 3 |
| Hearing loss NOS                                 | 10 | 1 |
| Oral mucositis NOS                               | 9  | 9 |
| Fluid overload NOS                               | 9  | 8 |
| Severe protein-calorie malnutrition NOS          | 9  | 7 |
| Developmental disorder speech & language NOS     | 9  | 7 |
| Dehydration                                      | 9  | 7 |
| Epilepsy NOS not intract w status epilepticus    | 9  | 6 |
| Hypoxemia                                        | 9  | 6 |
| Graft-versus-host disease NOS                    | 9  | 5 |
| Drug-induced adrenocortical insufficiency        | 9  | 5 |
| Cerebral palsy NOS                               | 9  | 5 |
| Snoring                                          | 9  | 5 |
| Allergy status drug, med & biol subst status NEC | 9  | 5 |
| Acute & chronic respiratory failure NOS          | 9  | 4 |
| Neuromuscular scoliosis site NOS                 | 9  | 4 |
| Encounter for general examination NEC            | 9  | 4 |
| Transplanted organ & tissue status NEC           | 9  | 4 |
| Disord magnesium metabol                         | 9  | 4 |
| Muscle weakness                                  | 9  | 3 |
| Obstructive sleep apnea                          | 9  | 3 |
| Grand mal w/o intract                            | 9  | 3 |
| Family hx asthma                                 | 9  | 3 |
| Artificial openings urinary tract status NEC     | 9  | 2 |
| Jt contracture-mult site                         | 9  | 2 |
| Dysphagia NEC                                    | 9  | 2 |
| Cutan-vesicostomy status                         | 9  | 1 |
| Enterovirus NOS as cause DCE                     | 8  | 8 |
| Oral mucositis D/T antineoplastic therapy        | 8  | 8 |
| Severe sepsis w septic shock                     | 8  | 8 |
| Specified postprocedural states NEC              | 8  | 8 |
| Pancytopenia NEC                                 | 8  | 7 |

|                                                  |   |   |
|--------------------------------------------------|---|---|
| Disorders electrolyte & fluid balance NEC        | 8 | 7 |
| Hypotension NOS                                  | 8 | 7 |
| Melena                                           | 8 | 7 |
| Complications gastrostomy NEC                    | 8 | 7 |
| Fussy infant                                     | 8 | 7 |
| Place NOS in hospital as PoO external cause      | 8 | 7 |
| Oth gen epilepsy & epil synd not intract w/o SE  | 8 | 6 |
| Places NEC as PoO external cause                 | 8 | 6 |
| Escherichia coli NOS as cause DCE                | 8 | 5 |
| Hyperosmolality & hypernatremia                  | 8 | 5 |
| Secondary hypertension NEC                       | 8 | 5 |
| Constipation NEC                                 | 8 | 5 |
| Specified congenital deformities hip NEC         | 8 | 5 |
| Lack expected normal physio develop in child NEC | 8 | 5 |
| Lack of coordination                             | 8 | 5 |
| Plagiocephaly                                    | 8 | 4 |
| Development delay NOS                            | 8 | 4 |
| GIE & epileptic syndromes not intractable w/o SE | 8 | 3 |
| Family hx neuro dis NEC                          | 8 | 3 |
| Bacterial agent NEC as cause DCE                 | 8 | 2 |
| Autoimmune hemolytic anemias NEC                 | 8 | 2 |
| Visual disturbance NOS                           | 8 | 2 |
| Ataxia NOS                                       | 8 | 2 |
| Family Hx asthma & oth chr lower resp diseases   | 8 | 2 |
| Personal history antineoplastic chemotherapy     | 8 | 2 |
| Presence of cerebrospinal fluid drainage device  | 8 | 2 |
| Coagulation defect NOS                           | 7 | 7 |
| Flu D/T identif flu vir NEC w resp manifest NEC  | 7 | 7 |
| Functional dyspepsia                             | 7 | 7 |
| Abnormal weight loss                             | 7 | 7 |
| Patient room in hospital as PoO external cause   | 7 | 7 |
| Sepsis organism NOS                              | 7 | 6 |
| Candidal stomatitis                              | 7 | 6 |
| Lack coordination NEC                            | 7 | 6 |
| Diarrhea                                         | 7 | 6 |
| Candidiasis skin & nail                          | 7 | 5 |
| Mild protein-calorie malnutrition                | 7 | 5 |
| Dermatitis NOS                                   | 7 | 5 |

|                                                  |   |   |
|--------------------------------------------------|---|---|
| Abn RXN-procedure NEC                            | 7 | 5 |
| Adverse effect glucocort & synth analogues init  | 7 | 4 |
| Transpl organ cause abn RXN/late comp w/o misadv | 7 | 4 |
| Rhinovirus infect NOS                            | 7 | 4 |
| Hx allergy NEC                                   | 7 | 4 |
| Methicillin suscept Staph aureus as cause DCE    | 7 | 3 |
| Dependence on suppl O2                           | 7 | 2 |
| Calculus kidney                                  | 7 | 1 |
| Other disorders plasma-protein metabolism NEC    | 6 | 6 |
| Acute respiratory failure NOS                    | 6 | 6 |
| Congenital hypotonia                             | 6 | 6 |
| Oth congenital malform musculoskeletal system    | 6 | 6 |
| Elevated blood-pressure reading w/o hypertension | 6 | 6 |
| Nausea w vomiting NOS                            | 6 | 6 |
| Abnormal involuntary movements NOS               | 6 | 6 |
| Restlessness & agitation                         | 6 | 6 |
| Bacteremia                                       | 6 | 6 |
| Exposure to factors NEC initial                  | 6 | 6 |
| Activity NOS                                     | 6 | 6 |
| Protein-calorie malnutrition NOS                 | 6 | 5 |
| Acute bronchiolitis D/T resp syncytial virus     | 6 | 5 |
| Acute bronchiolitis D/T specified organisms NEC  | 6 | 5 |
| Acute & chronic resp failure w hypercapnia       | 6 | 5 |
| Disorders bone density & structure NEC site NOS  | 6 | 5 |
| Acute kidney failure NOS                         | 6 | 5 |
| Macrocephaly                                     | 6 | 5 |
| Nasal congestion                                 | 6 | 5 |
| Hepatomegaly NEC                                 | 6 | 5 |
| Anxiety disorder NOS                             | 6 | 4 |
| Bacterial pneumonia NOS                          | 6 | 4 |
| Symptoms & signs involv musculoskel system NEC   | 6 | 4 |
| Bloodstream infection D/T CVC initial            | 6 | 4 |
| Gastrostomy mech comp                            | 6 | 4 |
| Stem cell transpl status                         | 6 | 4 |
| Cytomegaloviral disease NOS                      | 6 | 3 |
| Gen epilepsy & epileptic synd NEC intract w/o SE | 6 | 3 |
| Epileptic spasms intractable w/o SE              | 6 | 3 |
| Long QT syndrome                                 | 6 | 3 |

|                                                  |   |   |
|--------------------------------------------------|---|---|
| Chronic respiratory failure w hypoxia            | 6 | 3 |
| Dental caries NOS                                | 6 | 3 |
| Abnormal findings dxtic imaging skull & head NEC | 6 | 3 |
| Sev intell disabilities                          | 6 | 2 |
| Congenital quadriplegia                          | 6 | 2 |
| Cerebral palsy NOS                               | 6 | 2 |
| Oth soft tissue anomaly                          | 6 | 2 |
| Hydrocephalus NOS                                | 6 | 1 |
| Blindness both eyes                              | 6 | 1 |
| Congenital dislocation hip bilateral             | 6 | 1 |
| Encounter aftercare follow organ transplant NEC  | 6 | 1 |
| Hered prog musc dyst                             | 6 | 1 |
| Nasal & sinus dis NEC                            | 6 | 1 |
| Neurogenic bladder NOS                           | 6 | 1 |
| Hx UTI                                           | 6 | 1 |
| Viral intestinal infection NOS                   | 5 | 5 |
| Adenovirus as cause DCE                          | 5 | 5 |
| Hypoglycemia NOS                                 | 5 | 5 |
| Acute bronchiolitis NOS                          | 5 | 5 |
| Hypertrophy tonsils w hypertrophy adenoids       | 5 | 5 |
| Acute respiratory failure w hypercapnia          | 5 | 5 |
| Dyspnea NOS                                      | 5 | 5 |
| Ascites NEC                                      | 5 | 5 |
| Family Hx IHD & circulatory system disease NEC   | 5 | 5 |
| Viral infection NOS                              | 5 | 5 |
| Anemia D/T antineoplastic chemotherapy           | 5 | 4 |
| Dystonia NOS                                     | 5 | 4 |
| Insomnia NOS                                     | 5 | 4 |
| Sx & signs concerning food & fluid intake NEC    | 5 | 4 |
| Nonspecific levels transaminase & LDH            | 5 | 4 |
| Reconstr surg cause abn RXN/late comp w/o misadv | 5 | 4 |
| Body mass index pediatric 5% to <85% for age     | 5 | 4 |
| LRE w SPS w/o intract                            | 5 | 4 |
| Oth cardiac dysrhythmias                         | 5 | 4 |
| Dental caries NOS                                | 5 | 4 |
| Diaper or napkin rash                            | 5 | 4 |
| Resp abnormality NEC                             | 5 | 4 |
| Stridor                                          | 5 | 4 |



|                                                  |   |   |
|--------------------------------------------------|---|---|
| Influenza vaccine                                | 5 | 4 |
| Chronic graft-versus-host disease                | 5 | 3 |
| Obesity NOS                                      | 5 | 3 |
| Epileptic spasms not intractable w/o SE          | 5 | 3 |
| Legal blindness as defined in USA                | 5 | 3 |
| Body mass index >=95% for age pediatric          | 5 | 3 |
| Family history mental & behavioral disorders NEC | 5 | 3 |
| Personal Hx diseases nerv syst & sense organ NEC | 5 | 3 |
| Alkalosis                                        | 5 | 3 |
| Hypopotassemia                                   | 5 | 3 |
| Hypertension NOS                                 | 5 | 3 |
| Muscle/ligament dis NOS                          | 5 | 3 |
| Delayed milestones                               | 5 | 3 |
| Cough                                            | 5 | 3 |
| Abn RXN-external stoma                           | 5 | 3 |
| Specified polyneuropathies NEC                   | 5 | 2 |
| Portal hypertension                              | 5 | 2 |
| Congenital laryngomalacia                        | 5 | 2 |
| Intell disabilities NOS                          | 5 | 2 |
| Ac & chr resp failure                            | 5 | 2 |
| Hx respiratory dis NEC                           | 5 | 2 |
| Intermittent explosive disorder                  | 5 | 1 |
| LRSE & epileptic syndrome w CPS not intract w SE | 5 | 1 |
| Nonrheumatic mitral insufficiency                | 5 | 1 |
| Contracture right knee                           | 5 | 1 |
| Contracture left knee                            | 5 | 1 |
| Transv Dfx shaft lt femur subsq CLFX delay heal  | 5 | 1 |
| Ca metabol disorder NOS                          | 5 | 1 |
| Tracheostomy comp NEC                            | 5 | 1 |
| Bladder calculus NEC                             | 5 | 1 |
| Oth bladder dysfunction                          | 5 | 1 |
| Enterostomy status NEC                           | 5 | 1 |
| Gammaherpesviral mononucleosis w/o complication  | 4 | 4 |
| Disorders phosphorus metabolism NEC              | 4 | 4 |
| Specific developmental disorder motor function   | 4 | 4 |
| Myoclonus                                        | 4 | 4 |
| Degenerative disease nervous system NOS          | 4 | 4 |
| LRSE & epileptic synd w SPS not intract w/o SE   | 4 | 4 |

|                                               |   |   |
|-----------------------------------------------|---|---|
| Nystagmus NOS                                 | 4 | 4 |
| Other forms nystagmus                         | 4 | 4 |
| Cardiac arrest cause NOS                      | 4 | 4 |
| Drug induced constipation                     | 4 | 4 |
| Hepatic veno-occlusive disease                | 4 | 4 |
| Seborrheic dermatitis NOS                     | 4 | 4 |
| Activity NEC                                  | 4 | 4 |
| Carrier or suspected carrier MRSA             | 4 | 4 |
| Family history diabetes mellitus              | 4 | 4 |
| Personal history specified conditions NEC     | 4 | 4 |
| Presence specified devices NEC                | 4 | 4 |
| Loss of weight                                | 4 | 4 |
| Acc in residential inst                       | 4 | 4 |
| Enterococcus as cause DCE                     | 4 | 3 |
| Klebsiella pneumoniae as cause DCE            | 4 | 3 |
| Other secondary thrombocytopenia              | 4 | 3 |
| Oth gen epilepsy & epil synd not intract w SE | 4 | 3 |
| Sleep apnea NOS                               | 4 | 3 |
| Central sleep apnea in CCE                    | 4 | 3 |
| Polyneuropathy NOS                            | 4 | 3 |
| Spastic quadriplegic cerebral palsy           | 4 | 3 |
| Conjunctivitis NOS                            | 4 | 3 |
| Specified diseases intestine NEC              | 4 | 3 |
| Granulomatous disorder skin & subq tissue NOS | 4 | 3 |
| Short Achilles tendon right ankle             | 4 | 3 |
| External cause status NOS                     | 4 | 3 |
| Encounter for antineoplastic chemotherapy     | 4 | 3 |
| Personal Hx venous thrombosis & embolism NEC  | 4 | 3 |
| Hypogammaglobulinem NOS                       | 4 | 3 |
| Otitis media NOS                              | 4 | 3 |
| Ac bronchiol D/T org NEC                      | 4 | 3 |
| SG secretion disturb                          | 4 | 3 |
| Dermatitis NOS                                | 4 | 3 |
| Adv eff antineoplastic                        | 4 | 3 |
| Hx anti-infect allergy                        | 4 | 3 |
| Postsurgical states NEC                       | 4 | 3 |
| Mitochondrial metabolism disorder NOS         | 4 | 2 |
| Adjustment disorder w anxiety                 | 4 | 2 |

|                                                  |   |   |
|--------------------------------------------------|---|---|
| Epilepsy NEC not intract w/o status epilepticus  | 4 | 2 |
| Primary central sleep apnea                      | 4 | 2 |
| Other chronic pain                               | 4 | 2 |
| Hearing loss NOS bilateral                       | 4 | 2 |
| Pain right leg                                   | 4 | 2 |
| Undescended testicle NOS                         | 4 | 2 |
| Congenital talipes calcaneovarus                 | 4 | 2 |
| Carrier bacterial diseases NEC                   | 4 | 2 |
| Special symptom NEC&NOS                          | 4 | 2 |
| Quadriplegia unspecified                         | 4 | 2 |
| Impacted cerumen                                 | 4 | 2 |
| Scoliosis NEC                                    | 4 | 2 |
| Ostium secundum type ASD                         | 4 | 2 |
| Hx penicillin allergy                            | 4 | 2 |
| Atten to enterostomy NEC                         | 4 | 2 |
| Chronic systolic heart failure                   | 4 | 1 |
| Encounter rout child health exam w/o abn finding | 4 | 1 |
| Encounter fit & adjust GI appliance & dev NEC    | 4 | 1 |
| Family history intellectual disabilities         | 4 | 1 |
| Umbilical hernia                                 | 4 | 1 |
| Oth impaired renal funct                         | 4 | 1 |
| Difficulty walking                               | 4 | 1 |
| Nutrit/metabol Sx NEC                            | 4 | 1 |
| Comp marrow transplant                           | 4 | 1 |
| DNR status                                       | 4 | 1 |
| Adenoviral enteritis                             | 3 | 3 |
| Streptococcus NEC as cause DCE                   | 3 | 3 |
| Coronavirus NEC as cause DCE                     | 3 | 3 |
| Essential thrombocythemia                        | 3 | 3 |
| Antineoplastic chemotherapy induced pancytopenia | 3 | 3 |
| Acute posthemorrhagic anemia                     | 3 | 3 |
| Elevated white blood cell count NOS              | 3 | 3 |
| Moderate protein-calorie malnutrition            | 3 | 3 |
| Hypocalcemia                                     | 3 | 3 |
| Hypercalcemia                                    | 3 | 3 |
| Seizures NEC                                     | 3 | 3 |
| Sleep disorder NOS                               | 3 | 3 |
| Guillain-Barre syndrome                          | 3 | 3 |

|                                                  |   |   |
|--------------------------------------------------|---|---|
| Acute postprocedural pain NEC                    | 3 | 3 |
| Familial dysautonomia                            | 3 | 3 |
| Cerebral cysts                                   | 3 | 3 |
| Optic atrophy NOS                                | 3 | 3 |
| Otitis media NOS ear NOS                         | 3 | 3 |
| Acute pharyngitis NOS                            | 3 | 3 |
| Specified diseases upper respiratory tract NEC   | 3 | 3 |
| Mild intermittent asthma uncomplicated           | 3 | 3 |
| Pleural effusion NEC                             | 3 | 3 |
| Noninfective gastroenteritis & colitis NOS       | 3 | 3 |
| Ileus NOS                                        | 3 | 3 |
| Specified diseases liver NEC                     | 3 | 3 |
| Local skin erupt D/T drug & med taken internally | 3 | 3 |
| Specified erythematous conditions NEC            | 3 | 3 |
| Granulomatous disorders skin & subq tissue NEC   | 3 | 3 |
| Specified anomalies jaw size NEC                 | 3 | 3 |
| Acquired deformity head NEC                      | 3 | 3 |
| Conditions originating in perinatal period NEC   | 3 | 3 |
| Chromosomal abnormality NOS                      | 3 | 3 |
| Cardiac murmur NOS                               | 3 | 3 |
| Apnea NEC                                        | 3 | 3 |
| Abdominal pain NOS                               | 3 | 3 |
| Retention urine NOS                              | 3 | 3 |
| Anuria & oliguria                                | 3 | 3 |
| Drug induced fever                               | 3 | 3 |
| Weakness                                         | 3 | 3 |
| Adverse effect opioids NEC initial               | 3 | 3 |
| Hypothermia initial                              | 3 | 3 |
| Place NOS non-instit resid NOS as PoO ext cause  | 3 | 3 |
| Encounter for attention to tracheostomy          | 3 | 3 |
| Personal history neglect in childhood            | 3 | 3 |
| Awaiting organ transplant status                 | 3 | 3 |
| Family history consanguinity                     | 3 | 3 |
| Allergy status anti-infective agents status NEC  | 3 | 3 |
| Dependence on oth enabling machines & devices    | 3 | 3 |
| LRE w CPS w/o intract                            | 3 | 3 |
| Flu w resp manifest NEC                          | 3 | 3 |
| Stomat & mucositis NOS                           | 3 | 3 |

|                                                  |   |   |
|--------------------------------------------------|---|---|
| Gastrostomy comp NOS                             | 3 | 3 |
| Scoliosis in oth dis                             | 3 | 3 |
| Fever w CCE                                      | 3 | 3 |
| Septic shock                                     | 3 | 3 |
| Resp syst/chest Sx NEC                           | 3 | 3 |
| Bacteremia                                       | 3 | 3 |
| Abnormal reflex                                  | 3 | 3 |
| Prophylactic isolation                           | 3 | 3 |
| Fit/adjust vasc cath                             | 3 | 3 |
| Diet surveil & counsel                           | 3 | 3 |
| Adenovirus infection NOS                         | 3 | 2 |
| Iron deficiency anemia NOS                       | 3 | 2 |
| Adrenocortical insufficiency NEC                 | 3 | 2 |
| Alkalosis                                        | 3 | 2 |
| Mixed disorder acid-base balance                 | 3 | 2 |
| Metabolic disorder NOS                           | 3 | 2 |
| Somatoform disorders NEC                         | 3 | 2 |
| LRSE & epileptic syndrome w CPS intract w/o SE   | 3 | 2 |
| Communicating hydrocephalus                      | 3 | 2 |
| Sensorineural hearing loss bilateral             | 3 | 2 |
| Cardiomegaly                                     | 3 | 2 |
| Hematemesis                                      | 3 | 2 |
| Gastrostomy infection                            | 3 | 2 |
| Cellulitis abdominal wall                        | 3 | 2 |
| Seborrhea capitis                                | 3 | 2 |
| Torticollis                                      | 3 | 2 |
| Neuralgia & neuritis NOS                         | 3 | 2 |
| Preterm newborn gestational age 34 compl weeks   | 3 | 2 |
| Abnormal findings on neonatal screening          | 3 | 2 |
| Repeated falls                                   | 3 | 2 |
| Abnormal findings urine NOS                      | 3 | 2 |
| Abnormal results pulmonary function studies      | 3 | 2 |
| Form ext stoma caus abn RXN/late comp w/o misadv | 3 | 2 |
| Place NEC in hospital as PoO external cause      | 3 | 2 |
| Encounter for F/U exam after compl Tx cond NEC   | 3 | 2 |
| Homelessness                                     | 3 | 2 |
| Long term use insulin                            | 3 | 2 |
| Family Hx epilepsy & diseases nervous system NEC | 3 | 2 |

|                                                 |   |   |
|-------------------------------------------------|---|---|
| Allergy to eggs                                 | 3 | 2 |
| Other specified personal risk factors NEC       | 3 | 2 |
| Devel coordination dis                          | 3 | 2 |
| Encephalopathy NOS                              | 3 | 2 |
| Optic atrophy NOS                               | 3 | 2 |
| CHF NOS                                         | 3 | 2 |
| Pleural effusion NOS                            | 3 | 2 |
| NonINF gastroent NEC&NOS                        | 3 | 2 |
| Fever                                           | 3 | 2 |
| Nonsp skin eruption NEC                         | 3 | 2 |
| Strep pneumoniae vaccine                        | 3 | 2 |
| Long-term steroid use                           | 3 | 2 |
| Disorder calcium metabolism NOS                 | 3 | 1 |
| Cerebral palsy NEC                              | 3 | 1 |
| Anoxic brain damage NEC                         | 3 | 1 |
| Dry eye syndrome bilateral lacrimal glands      | 3 | 1 |
| Alternating exotropia                           | 3 | 1 |
| Cardiomyopathies NEC                            | 3 | 1 |
| Cardiomyopathy NOS                              | 3 | 1 |
| Acute streptococcal tonsillitis NOS             | 3 | 1 |
| Collapsed vertebra NEC site NOS initial         | 3 | 1 |
| Pain left leg                                   | 3 | 1 |
| Acute cystitis w/o hematuria                    | 3 | 1 |
| Acquired absence spleen                         | 3 | 1 |
| Hemoglobinopathies NEC                          | 3 | 1 |
| Endocard fibroelastosis                         | 3 | 1 |
| Urinary calculus NOS                            | 3 | 1 |
| Congenital ptosis                               | 3 | 1 |
| Routine child health ck                         | 3 | 1 |
| Dual sensory impairment                         | 3 | 1 |
| Enterocolitis D/T Clostridium difficile         | 2 | 2 |
| Rotaviral enteritis                             | 2 | 2 |
| Enteroviral vesicular stomatitis w exanthem     | 2 | 2 |
| Viral infection char by skin & MM lesions NOS   | 2 | 2 |
| Cytomegaloviral diseases NEC                    | 2 | 2 |
| Enterovirus infection NOS                       | 2 | 2 |
| Candidiasis NOS                                 | 2 | 2 |
| Methicillin resistant Staph aureus as cause DCE | 2 | 2 |

|                                                  |   |   |
|--------------------------------------------------|---|---|
| Staphylococcus NEC as cause DCE                  | 2 | 2 |
| Respiratory syncytial virus as cause DCE         | 2 | 2 |
| Drug-induced pancytopenia NEC                    | 2 | 2 |
| Decreased white blood cell count NOS             | 2 | 2 |
| Immunodeficiency NOS                             | 2 | 2 |
| Disorder involving immune mechanism NOS          | 2 | 2 |
| Morbid obesity D/T excess calories               | 2 | 2 |
| Disorder urea cycle metabolism NOS               | 2 | 2 |
| Metachromatic leukodystrophy                     | 2 | 2 |
| Mental disorder NOS D/T known physio condition   | 2 | 2 |
| Degenerative diseases nervous system NEC         | 2 | 2 |
| Demyelinating disease central nervous system NOS | 2 | 2 |
| LRSE & epileptic syndrome w CPS intractable w SE | 2 | 2 |
| Sleep disorders NEC                              | 2 | 2 |
| Disorders brain NEC                              | 2 | 2 |
| Disorder eyelid NOS                              | 2 | 2 |
| Astigmatism NOS bilateral                        | 2 | 2 |
| Astigmatism NOS eye NOS                          | 2 | 2 |
| Impacted cerumen bilateral                       | 2 | 2 |
| Ac supp otitis media w/o rupt ear drum right ear | 2 | 2 |
| Ac supp otitis media w/o rupt ear drum bilateral | 2 | 2 |
| Otitis media NOS right ear                       | 2 | 2 |
| Otitis media NOS left ear                        | 2 | 2 |
| Sensorineural hearing loss NOS                   | 2 | 2 |
| Secondary pulmonary hypertension NEC             | 2 | 2 |
| Portal vein thrombosis                           | 2 | 2 |
| Respiratory syncytial virus pneumonia            | 2 | 2 |
| Pneumonia D/T methicillin suscept staph aureus   | 2 | 2 |
| Pneumonia D/T Mycoplasma pneumoniae              | 2 | 2 |
| Seasonal allergic rhinitis NEC                   | 2 | 2 |
| Chronic sinusitis NOS                            | 2 | 2 |
| Specified disorders nose & nasal sinuses NEC     | 2 | 2 |
| Chronic pulmonary edema                          | 2 | 2 |
| Respiratory failure NOS                          | 2 | 2 |
| Respiratory failure NOS w hypoxia                | 2 | 2 |
| Respiratory disorder NOS                         | 2 | 2 |
| Teething syndrome                                | 2 | 2 |
| Gastritis NOS w/o bleeding                       | 2 | 2 |

|                                               |   |   |
|-----------------------------------------------|---|---|
| Slow transit constipation                     | 2 | 2 |
| Enterostomy malfunction                       | 2 | 2 |
| Allergic contact dermatitis D/T drugs on skin | 2 | 2 |
| Allergic urticaria                            | 2 | 2 |
| Infantile idiopathic scoliosis site NOS       | 2 | 2 |
| Contracture muscle multiple sites             | 2 | 2 |
| Disorder muscle NOS                           | 2 | 2 |
| Short Achilles tendon left ankle              | 2 | 2 |
| Pain right arm                                | 2 | 2 |
| ENM diseases complicating childbirth          | 2 | 2 |
| Neonatal candidiasis                          | 2 | 2 |
| Newborn esophageal reflux                     | 2 | 2 |
| Convulsions newborn                           | 2 | 2 |
| Failure to thrive in newborn                  | 2 | 2 |
| Feeding problem newborn NOS                   | 2 | 2 |
| Misplaced ear                                 | 2 | 2 |
| Patent ductus arteriosus                      | 2 | 2 |
| Ankyloglossia                                 | 2 | 2 |
| Specified chromosome abnormalities NEC        | 2 | 2 |
| Acute respiratory distress                    | 2 | 2 |
| Stridor                                       | 2 | 2 |
| Wheezing                                      | 2 | 2 |
| Generalized abdominal pain                    | 2 | 2 |
| Nausea                                        | 2 | 2 |
| Hepatomegaly w splenomegaly NEC               | 2 | 2 |
| Localized swelling, mass & lump head          | 2 | 2 |
| Tremor NOS                                    | 2 | 2 |
| Abnormal involuntary movements NEC            | 2 | 2 |
| Difficulty walking NEC                        | 2 | 2 |
| Abnormalities gait & mobility NEC             | 2 | 2 |
| Retention urine NEC                           | 2 | 2 |
| Excessive crying child, adolescent or adult   | 2 | 2 |
| Speech disturbances NEC                       | 2 | 2 |
| Headache                                      | 2 | 2 |
| Syncope & collapse                            | 2 | 2 |
| Hypovolemic shock                             | 2 | 2 |
| Short stature                                 | 2 | 2 |
| Apparent life threatening event in infant     | 2 | 2 |



|                                                  |   |   |
|--------------------------------------------------|---|---|
| Abnormal findings diagnostic imaging CNS NEC     | 2 | 2 |
| Abnormal brain scan                              | 2 | 2 |
| Foreign obj NEC resp tract NOS caus asphyx init  | 2 | 2 |
| Adverse effect penicillins initial               | 2 | 2 |
| Adverse effect systemic antibiotics NEC initial  | 2 | 2 |
| Adverse effect drug, med & biol subst NEC init   | 2 | 2 |
| Thrombosis D/T vasc prosth dev, impl & gft init  | 2 | 2 |
| Complications bone marrow transplant NEC         | 2 | 2 |
| Surg px NEC cause abn RXN/late comp w/o misadv   | 2 | 2 |
| Encount exam norm compar & control clin research | 2 | 2 |
| Underimmunization status                         | 2 | 2 |
| Single live birth                                | 2 | 2 |
| 39 weeks gestation of pregnancy                  | 2 | 2 |
| Encounter change/remove nonsurg wound dressing   | 2 | 2 |
| Encounter health svc in specified circumst NEC   | 2 | 2 |
| Physical restraint status                        | 2 | 2 |
| Long term use inhaled steroids                   | 2 | 2 |
| Family Hx endocrine, nutrit & metab diseases NEC | 2 | 2 |
| Personal Hx infectious & parasitic diseases NEC  | 2 | 2 |
| Personal history diseases circulatory system NEC | 2 | 2 |
| Allergy status penicillin                        | 2 | 2 |
| Allergy to foods NEC                             | 2 | 2 |
| Specified postprocedural states NEC              | 2 | 2 |
| Septicemia NOS                                   | 2 | 2 |
| Adenovirus infect NOS                            | 2 | 2 |
| Thrush                                           | 2 | 2 |
| Lipidoses                                        | 2 | 2 |
| Acidosis                                         | 2 | 2 |
| Autoimmune hemoly anemia                         | 2 | 2 |
| Neutropenia NOS                                  | 2 | 2 |
| Prim central sleep apnea                         | 2 | 2 |
| Brain conditions NEC                             | 2 | 2 |
| Nerv syst disord NEC                             | 2 | 2 |
| Chalazion                                        | 2 | 2 |
| Secondary HTN NEC & NOS                          | 2 | 2 |
| Ac bronchiolitis D/T RSV                         | 2 | 2 |
| RSV pneumonia                                    | 2 | 2 |
| Asthma w status asth                             | 2 | 2 |

|                                                  |   |   |
|--------------------------------------------------|---|---|
| Other pulmonary insuff                           | 2 | 2 |
| #MULTIVALUE                                      | 2 | 2 |
| Allergic urticaria                               | 2 | 2 |
| Jt contracture-site NOS                          | 2 | 2 |
| Disorder bone & cart NOS                         | 2 | 2 |
| Laryngotrach anomaly NEC                         | 2 | 2 |
| Anorexia                                         | 2 | 2 |
| Cardiac murmurs NEC                              | 2 | 2 |
| Apnea                                            | 2 | 2 |
| Dysphagia-oroPHAR                                | 2 | 2 |
| Irritability                                     | 2 | 2 |
| Severe sepsis                                    | 2 | 2 |
| Mech comp oth vasc dev                           | 2 | 2 |
| Mech comp dev/graft NEC                          | 2 | 2 |
| Family hx diabetes                               | 2 | 2 |
| Gram-negative sepsis NOS                         | 2 | 1 |
| Methicillin resist Staph aureus infect site NEC  | 2 | 1 |
| Sickle-cell trait                                | 2 | 1 |
| Drug/chem induced DM w/o complications           | 2 | 1 |
| Nutritional deficiency NOS                       | 2 | 1 |
| Major depressive disorder single episode NOS     | 2 | 1 |
| Adjustment disorder w depressed mood             | 2 | 1 |
| Mixed receptive-expressive language disorder     | 2 | 1 |
| GIE & epileptic syndromes intractable w SE       | 2 | 1 |
| Spastic diplegic cerebral palsy                  | 2 | 1 |
| Spastic hemiplegia affecting right dominant side | 2 | 1 |
| Dry eye syndrome NOS lacrimal gland              | 2 | 1 |
| Visual disturbances NEC                          | 2 | 1 |
| Hearing loss NOS ear NOS                         | 2 | 1 |
| Hypertensive CKD stage 1 through 4 or NOS        | 2 | 1 |
| Acute on chronic systolic heart failure          | 2 | 1 |
| Chronic systolic & diastolic heart failure       | 2 | 1 |
| Posterior reversible encephalopathy syndrome     | 2 | 1 |
| Secondary esophageal varices w bleeding          | 2 | 1 |
| Viral pneumonia NEC                              | 2 | 1 |
| Chronic pansinusitis                             | 2 | 1 |
| Chronic tonsillitis                              | 2 | 1 |
| Hypertrophy tonsils                              | 2 | 1 |

|                                                  |   |   |
|--------------------------------------------------|---|---|
| Esophagitis NEC                                  | 2 | 1 |
| Chronic idiopathic constipation                  | 2 | 1 |
| Liver cirrhosis NOS                              | 2 | 1 |
| Calculus gallbladder w/o cholecystitis w/o obstr | 2 | 1 |
| Malabsorption D/T intolerance NEC                | 2 | 1 |
| Allergic contact dermatitis D/T adhesives        | 2 | 1 |
| Valgus deformity NEC hip NOS                     | 2 | 1 |
| Recurrent dislocation right hip                  | 2 | 1 |
| Recurrent dislocation left hip                   | 2 | 1 |
| Postural kyphosis site NOS                       | 2 | 1 |
| Chronic kidney disease NOS                       | 2 | 1 |
| Cyst kidney acquired                             | 2 | 1 |
| Undescended testicle NOS bilateral               | 2 | 1 |
| Congenital talipes equinovarus                   | 2 | 1 |
| Symbolic dysfunctions NEC                        | 2 | 1 |
| Hypercalciuria                                   | 2 | 1 |
| Fx neck NOS left femur subseq CLFX routine heal  | 2 | 1 |
| Fall from chair initial                          | 2 | 1 |
| Events NEC undetermined intent initial           | 2 | 1 |
| Resistance to multiple antibiotics               | 2 | 1 |
| Encount attention to artif opening digestive NEC | 2 | 1 |
| Encounter for fitting & adjust non-vascular cath | 2 | 1 |
| Encounter for orthopedic aftercare NEC           | 2 | 1 |
| Encounter aftercare follow bone marrow transpl   | 2 | 1 |
| Body mass index <5% for age pediatric            | 2 | 1 |
| Specified health status NEC                      | 2 | 1 |
| Long term use anticoagulants                     | 2 | 1 |
| Long term use aspirin                            | 2 | 1 |
| Family history disorders kidney & ureter         | 2 | 1 |
| Family history specified conditions NEC          | 2 | 1 |
| Personal Hx dis MS syst & connective tissue NEC  | 2 | 1 |
| Allergy status NEC other than drugs & biol subst | 2 | 1 |
| Appendico-vesicostomy status                     | 2 | 1 |
| Gram-neg bact infect NEC                         | 2 | 1 |
| Cutaneous candidiasis                            | 2 | 1 |
| Glucocorticoid def                               | 2 | 1 |
| Elect/fluid disord NEC                           | 2 | 1 |
| Immunity deficiency NOS                          | 2 | 1 |

|                                                  |   |   |
|--------------------------------------------------|---|---|
| Graft-v-host disease NOS                         | 2 | 1 |
| Mixed development disord                         | 2 | 1 |
| Cent sleep apnea in CCE                          | 2 | 1 |
| Intractable epilepsy NOS                         | 2 | 1 |
| Encephalopathy NEC                               | 2 | 1 |
| Hypertr tonsil w adenoid                         | 2 | 1 |
| Asthma NOS w exacer                              | 2 | 1 |
| Gastrostomy comp NEC                             | 2 | 1 |
| Diaphragmatic hernia                             | 2 | 1 |
| GI hemorrhage NOS                                | 2 | 1 |
| Cystitis NOS                                     | 2 | 1 |
| Leg cellulitis                                   | 2 | 1 |
| Congenital MVI                                   | 2 | 1 |
| Anomaly skull/face bones                         | 2 | 1 |
| Abnormal posture                                 | 2 | 1 |
| Nerv/MS symptoms NEC                             | 2 | 1 |
| Nonsp find-skull & head                          | 2 | 1 |
| FB in larynx                                     | 2 | 1 |
| RSV vaccine                                      | 2 | 1 |
| Viral dis vaccine NEC                            | 2 | 1 |
| Viral hepatitis vaccine                          | 2 | 1 |
| Hx GI disease NEC                                | 2 | 1 |
| Hx urinary calculi                               | 2 | 1 |
| Hx underimmunization                             | 2 | 1 |
| Hx fall                                          | 2 | 1 |
| Oth transplant status                            | 2 | 1 |
| Enterocol D/T Clostridium difficile not recur    | 1 | 1 |
| Infectious gastroenteritis & colitis NOS         | 1 | 1 |
| Sepsis D/T group A streptococcus                 | 1 | 1 |
| Sepsis D/T methicillin resistant staph aureus    | 1 | 1 |
| Sepsis D/T specified staphylococcus NEC          | 1 | 1 |
| Methicillin suscept Staph aureus infect site NOS | 1 | 1 |
| Bacterial infection NOS                          | 1 | 1 |
| Varicella w/o complication                       | 1 | 1 |
| Viral conjunctivitis NOS                         | 1 | 1 |
| Tinea corporis                                   | 1 | 1 |
| Pulmonary candidiasis                            | 1 | 1 |
| Mycoses NOS                                      | 1 | 1 |

|                                                  |   |   |
|--------------------------------------------------|---|---|
| Pediculosis D/T Pediculus humanus capitis        | 1 | 1 |
| Scabies                                          | 1 | 1 |
| Group A Streptococcus as cause DCE               | 1 | 1 |
| Staphylococcus NOS as cause DCE                  | 1 | 1 |
| Enterovirus NEC as cause DCE                     | 1 | 1 |
| Human metapneumovirus as cause DCE               | 1 | 1 |
| Infectious disease NOS                           | 1 | 1 |
| Melanocytic nevi NOS                             | 1 | 1 |
| Benign neoplasm skin NEC scalp & neck            | 1 | 1 |
| Sideropenic dysphagia                            | 1 | 1 |
| Activated protein C resistance                   | 1 | 1 |
| Evans syndrome                                   | 1 | 1 |
| Agranulocytosis secondary to cancer chemotherapy | 1 | 1 |
| Drug-induced agranulocytosis NEC                 | 1 | 1 |
| Neutropenia NEC                                  | 1 | 1 |
| Diseases blood & blood-forming organs NEC        | 1 | 1 |
| Disorders involving immune mechanism NEC         | 1 | 1 |
| Hypothyroidism NOS                               | 1 | 1 |
| Autoimmune thyroiditis                           | 1 | 1 |
| Thyroid disorder NOS                             | 1 | 1 |
| Drug/chem induced DM w hyperglycemia             | 1 | 1 |
| Type 1 diabetes mellitus w/o complications       | 1 | 1 |
| Diabetes mellitus NEC w/o complications          | 1 | 1 |
| Syndrome of IADH                                 | 1 | 1 |
| Adrenal gland disorders NEC                      | 1 | 1 |
| Precocious puberty                               | 1 | 1 |
| Overweight                                       | 1 | 1 |
| Lactose intolerance NOS                          | 1 | 1 |
| Disorder carbohydrate metabolism NOS             | 1 | 1 |
| Mucopolysaccharidoses NEC                        | 1 | 1 |
| Disorders bilirubin metabolism NEC               | 1 | 1 |
| Hypermagnesemia                                  | 1 | 1 |
| Disorders calcium metabolism NEC                 | 1 | 1 |
| Mitochondrial metabolism disorders NEC           | 1 | 1 |
| Nicotine dependence cigarettes uncomplicated     | 1 | 1 |
| Disruptive mood dysregulation disorder           | 1 | 1 |
| Anxiety disorders NEC                            | 1 | 1 |
| Acute stress reaction                            | 1 | 1 |

|                                                  |   |   |
|--------------------------------------------------|---|---|
| Pseudobulbar affect                              | 1 | 1 |
| Behav assoc w physio disturb & phys fact NOS     | 1 | 1 |
| Childhood onset fluency disorder                 | 1 | 1 |
| Autistic disorder                                | 1 | 1 |
| Attention-deficit hyperactivity disorder NEC     | 1 | 1 |
| Conduct disorder childhood-onset type            | 1 | 1 |
| Childhood disorders social functioning NEC       | 1 | 1 |
| Feeding disorders infancy & early childhood NEC  | 1 | 1 |
| Pica infancy & childhood                         | 1 | 1 |
| Extrapyramidal & movement disorder NOS           | 1 | 1 |
| Leigh's disease                                  | 1 | 1 |
| LRIE & epileptic synd w SLO not intract w/o SE   | 1 | 1 |
| LRIE & epileptic syndrome w SLO intractable w SE | 1 | 1 |
| LRIE & epileptic synd w SLO intractable w/o SE   | 1 | 1 |
| LRSE & epileptic syndrome w SPS not intract w SE | 1 | 1 |
| GIE & epileptic syndromes not intractable w SE   | 1 | 1 |
| Lennox-Gastaut syndrome intractable w SE         | 1 | 1 |
| Lennox-Gastaut syndrome intractable w/o SE       | 1 | 1 |
| Hypersomnia NOS                                  | 1 | 1 |
| Circadian rhythm sleep disorder type NOS         | 1 | 1 |
| Bell's palsy                                     | 1 | 1 |
| Polyneuropathy in DCE                            | 1 | 1 |
| Myoneural disorder NOS                           | 1 | 1 |
| Muscular dystrophy                               | 1 | 1 |
| Paralytic syndrome NOS                           | 1 | 1 |
| Horner's syndrome                                | 1 | 1 |
| Autonomic dysreflexia                            | 1 | 1 |
| Disorder autonomic nervous system NOS            | 1 | 1 |
| Obstructive hydrocephalus                        | 1 | 1 |
| Toxic encephalopathy                             | 1 | 1 |
| Metabolic encephalopathy                         | 1 | 1 |
| Cerebral edema                                   | 1 | 1 |
| Disorders brain NEC in DCE                       | 1 | 1 |
| Syringomyelia & syringobulbia                    | 1 | 1 |
| Disorders nervous system NEC                     | 1 | 1 |
| Hordeolum externum left lower eyelid             | 1 | 1 |
| Ptosis eyelid NOS left eyelid                    | 1 | 1 |
| Ptosis eyelid NOS bilateral eyelids              | 1 | 1 |

|                                                 |   |   |
|-------------------------------------------------|---|---|
| Conjunctival edema right eye                    | 1 | 1 |
| Corneal scars & opacities NEC                   | 1 | 1 |
| Optic atrophy NEC bilateral                     | 1 | 1 |
| Cortical blindness brain side NOS               | 1 | 1 |
| Progressive external ophthalmoplegia eye NOS    | 1 | 1 |
| Esotropia NOS                                   | 1 | 1 |
| Exotropia NOS                                   | 1 | 1 |
| Alternating exotropia w V pattern               | 1 | 1 |
| Specified disorders binocular movement NEC      | 1 | 1 |
| Myopia eye NOS                                  | 1 | 1 |
| Myopia bilateral                                | 1 | 1 |
| Anisometropia                                   | 1 | 1 |
| Anisocoria                                      | 1 | 1 |
| Specified disorders eye & adnexa NEC            | 1 | 1 |
| Other specified disorders eye & adnexa          | 1 | 1 |
| Cellulitis left external ear                    | 1 | 1 |
| Otitis externa NOS ear NOS                      | 1 | 1 |
| Impacted cerumen ear NOS                        | 1 | 1 |
| Impacted cerumen left ear                       | 1 | 1 |
| Acute nonsuppurative otitis media NEC bilateral | 1 | 1 |
| Chronic mucoid otitis media bilateral           | 1 | 1 |
| Chr nonsuppurative otitis media NEC right ear   | 1 | 1 |
| Chr nonsuppurative otitis media NEC bilateral   | 1 | 1 |
| Chronic nonsuppurative otitis media NEC ear NOS | 1 | 1 |
| Ac supp otitis media w/o rupt ear drum left ear | 1 | 1 |
| Suppurative otitis media NOS right ear          | 1 | 1 |
| Otitis media NOS bilateral                      | 1 | 1 |
| Conductive hearing loss NOS                     | 1 | 1 |
| SHL unilat rt ear w unrestrict hearing oth side | 1 | 1 |
| Otalgia ear NOS                                 | 1 | 1 |
| Rheumatic tricuspid insufficiency               | 1 | 1 |
| Rheumatic disord both mitral & tricuspid valves | 1 | 1 |
| Secondary hypertension NOS                      | 1 | 1 |
| Pulmonary embolism NEC w/o acute cor pulmonale  | 1 | 1 |
| Pericardial effusion                            | 1 | 1 |
| Nonrheumatic tricuspid insufficiency            | 1 | 1 |
| Cardiomyopathy in DCE                           | 1 | 1 |
| Pre-excitation syndrome                         | 1 | 1 |

|                                                  |   |   |
|--------------------------------------------------|---|---|
| Ventricular premature depolarization             | 1 | 1 |
| Sick sinus syndrome                              | 1 | 1 |
| Specified cardiac arrhythmias NEC                | 1 | 1 |
| Cardiac arrhythmia NOS                           | 1 | 1 |
| Acute on chronic systolic & diastolic HF         | 1 | 1 |
| Heart failure NOS                                | 1 | 1 |
| Myocarditis NOS                                  | 1 | 1 |
| Nonpyogenic thrombosis intracranial venous syst  | 1 | 1 |
| Acute embolism & thrombosis superior vena cava   | 1 | 1 |
| Acute embolism & thrombosis deep vein NOS LE NOS | 1 | 1 |
| Acute embolism & thrombosis right femoral vein   | 1 | 1 |
| Acute embolism & thrombosis left femoral vein    | 1 | 1 |
| Acute embolism & thrombosis right iliac vein     | 1 | 1 |
| Acute embolism & thrombosis specified veins NEC  | 1 | 1 |
| Ac embolism & thrombosis right int jugular vein  | 1 | 1 |
| Esophageal varices w/o bleeding                  | 1 | 1 |
| Hypotension NEC                                  | 1 | 1 |
| Postprocedural hypertension                      | 1 | 1 |
| Acute recurrent tonsillitis NOS                  | 1 | 1 |
| Flu D/T identif flu virus NEC w pneumonia NOS    | 1 | 1 |
| Adenoviral pneumonia                             | 1 | 1 |
| Human metapneumovirus pneumonia                  | 1 | 1 |
| Pneumonia D/T Pseudomonas                        | 1 | 1 |
| Pneumonia D/T Gram-negative bacteria NEC         | 1 | 1 |
| Lobar pneumonia organism NOS                     | 1 | 1 |
| Acute bronchitis D/T rhinovirus                  | 1 | 1 |
| Acute bronchitis D/T specified organisms NEC     | 1 | 1 |
| Acute bronchiolitis D/T human metapneumovirus    | 1 | 1 |
| Allergic rhinitis NOS                            | 1 | 1 |
| Chronic pharyngitis                              | 1 | 1 |
| Chronic adenoiditis                              | 1 | 1 |
| Hypertrophy adenoids                             | 1 | 1 |
| Stenosis larynx                                  | 1 | 1 |
| Diseases pharynx NEC                             | 1 | 1 |
| Chronic bronchitis NOS                           | 1 | 1 |
| Mild persistent asthma uncomplicated             | 1 | 1 |
| Asthma NOS w exacerbation                        | 1 | 1 |
| Bronchiectasis w acute low respiratory infection | 1 | 1 |



|                                                  |   |   |
|--------------------------------------------------|---|---|
| Acute respiratory distress syndrome              | 1 | 1 |
| Pleural effusion in CCE NEC                      | 1 | 1 |
| Tracheostomy complication NEC                    | 1 | 1 |
| Acute postprocedural respiratory failure         | 1 | 1 |
| Ventilator associated pneumonia                  | 1 | 1 |
| Chronic respiratory failure w hypercapnia        | 1 | 1 |
| Other diseases bronchus NEC                      | 1 | 1 |
| Respiratory disorders in DCE                     | 1 | 1 |
| Ankylosis teeth                                  | 1 | 1 |
| Disorder teeth & supporting structures NOS       | 1 | 1 |
| Other forms stomatitis                           | 1 | 1 |
| Oral mucositis D/T other drugs                   | 1 | 1 |
| Oral mucositis NEC                               | 1 | 1 |
| Lesions oral mucosa NOS                          | 1 | 1 |
| Diseases tongue NEC                              | 1 | 1 |
| Eosinophilic esophagitis                         | 1 | 1 |
| Gastro-esophageal reflux disease w esophagitis   | 1 | 1 |
| Ulcer esophagus w bleeding                       | 1 | 1 |
| Gastritis NEC w bleeding                         | 1 | 1 |
| Gastroparesis                                    | 1 | 1 |
| Disease stomach & duodenum NOS                   | 1 | 1 |
| Bilat ing hernia w/o obstr or gangr not recur    | 1 | 1 |
| Diaphragmatic hernia w/o obstruction or gangrene | 1 | 1 |
| Toxic gastroenteritis & colitis                  | 1 | 1 |
| Vascular disorder intestine NOS                  | 1 | 1 |
| Peritonitis NEC                                  | 1 | 1 |
| Peritonitis NOS                                  | 1 | 1 |
| Specified disorders peritoneum NEC               | 1 | 1 |
| Acute & subacute hepatic failure w/o coma        | 1 | 1 |
| Hepatic fibrosis                                 | 1 | 1 |
| Liver cirrhosis NEC                              | 1 | 1 |
| Fatty liver NEC                                  | 1 | 1 |
| Acute pancreatitis NOS                           | 1 | 1 |
| Postprocedural intestinal obstruction            | 1 | 1 |
| Acc punct & lac digest organ during digest px    | 1 | 1 |
| Gastrointestinal hemorrhage NOS                  | 1 | 1 |
| Gastrostomy complication NOS                     | 1 | 1 |
| Impetigo NOS                                     | 1 | 1 |

|                                                |   |   |
|------------------------------------------------|---|---|
| Impetigo NEC                                   | 1 | 1 |
| Cutaneous abscess face                         | 1 | 1 |
| Cellulitis face                                | 1 | 1 |
| Cellulitis neck                                | 1 | 1 |
| Cellulitis groin                               | 1 | 1 |
| Local infection skin & subcutaneous tissue NOS | 1 | 1 |
| Allergic contact dermatitis D/T agents NEC     | 1 | 1 |
| Irritant contact dermatitis D/T agents NEC     | 1 | 1 |
| Irritant contact dermatitis cause NOS          | 1 | 1 |
| Pruritus NEC                                   | 1 | 1 |
| Pruritus NOS                                   | 1 | 1 |
| Erythema intertrigo                            | 1 | 1 |
| Specified dermatitis NEC                       | 1 | 1 |
| Urticaria NEC                                  | 1 | 1 |
| Urticaria NOS                                  | 1 | 1 |
| Erythematous condition NOS                     | 1 | 1 |
| Nonscarring hair loss NOS                      | 1 | 1 |
| Hirsutism                                      | 1 | 1 |
| Hidradenitis suppurativa                       | 1 | 1 |
| Specified follicular disorders NEC             | 1 | 1 |
| Pressure ulcer site NEC stage NOS              | 1 | 1 |
| Foreign body granuloma skin & subq tissue      | 1 | 1 |
| Non-press chr ulcer part NEC rt foot w sev NOS | 1 | 1 |
| Non-pressure chronic ulcer buttock w sev NOS   | 1 | 1 |
| Deformities toes NEC left foot                 | 1 | 1 |
| Valgus deformity NEC site NOS                  | 1 | 1 |
| Foot drop left foot                            | 1 | 1 |
| Flat foot right foot                           | 1 | 1 |
| Acquired deformities NEC lower leg NOS         | 1 | 1 |
| Acquired deformity NOS right hand              | 1 | 1 |
| Internal derangements NEC right knee           | 1 | 1 |
| Internal derangements NEC left knee            | 1 | 1 |
| Pathological dislocation NEC right hip         | 1 | 1 |
| Pathological dislocation NEC left hip          | 1 | 1 |
| Contracture hand NOS                           | 1 | 1 |
| Contracture foot NOS                           | 1 | 1 |
| Other specific joint derangements NEC left hip | 1 | 1 |
| Malocclusion NOS                               | 1 | 1 |

|                                                  |   |   |
|--------------------------------------------------|---|---|
| Thrombotic microangiopathy                       | 1 | 1 |
| Kyphosis NOS site NOS                            | 1 | 1 |
| Kyphosis NEC thoracic region                     | 1 | 1 |
| Neuromuscular scoliosis cervicothoracic region   | 1 | 1 |
| Neuromuscular scoliosis thoracic region          | 1 | 1 |
| Secondary scoliosis NEC site NOS                 | 1 | 1 |
| Secondary scoliosis NEC thoracic region          | 1 | 1 |
| Other forms scoliosis site NOS                   | 1 | 1 |
| Cervicalgia                                      | 1 | 1 |
| Sciatica left side                               | 1 | 1 |
| Infective myositis right lower leg               | 1 | 1 |
| Infective myositis left lower leg                | 1 | 1 |
| Muscle wasting & atrophy NEC site NOS            | 1 | 1 |
| Rhabdomyolysis                                   | 1 | 1 |
| Sarcopenia                                       | 1 | 1 |
| Pain left arm                                    | 1 | 1 |
| Pain right lower leg                             | 1 | 1 |
| Pain left lower leg                              | 1 | 1 |
| Age-rel osteoporosis w current Pfx site NOS init | 1 | 1 |
| Osteoporosis NEC w/o current pathological fx     | 1 | 1 |
| Disorders bone density & structure NEC site NEC  | 1 | 1 |
| Disorders bone NEC site NOS                      | 1 | 1 |
| Disorder bone NOS                                | 1 | 1 |
| Hydroneph w renal & ureter calculous obstruction | 1 | 1 |
| Pyonephrosis                                     | 1 | 1 |
| Acute kidney failure w tubular necrosis          | 1 | 1 |
| Acute kidney failure NEC                         | 1 | 1 |
| Kidney failure NOS                               | 1 | 1 |
| Hydrocele NOS                                    | 1 | 1 |
| Phimosis                                         | 1 | 1 |
| Balanoposthitis                                  | 1 | 1 |
| Disorders prepuce NEC                            | 1 | 1 |
| Balanitis                                        | 1 | 1 |
| Acute vaginitis                                  | 1 | 1 |
| Excess & frequent menstruation w regular cycle   | 1 | 1 |
| Cond assoc w female genit & menstrual cycle NEC  | 1 | 1 |
| Pregnancy related conditions NEC 3rd trimester   | 1 | 1 |
| MTL care benign tumor corpus uteri 3rd trimester | 1 | 1 |

|                                                  |   |   |
|--------------------------------------------------|---|---|
| 1st degree perineal laceration during delivery   | 1 | 1 |
| 4th degree perineal laceration during delivery   | 1 | 1 |
| Abn fetal heart rate & rhythm comp labor & del   | 1 | 1 |
| Anemia complicating childbirth                   | 1 | 1 |
| Smoking complicating childbirth                  | 1 | 1 |
| Diseases nervous system complicating childbirth  | 1 | 1 |
| Diseases respiratory system comp childbirth      | 1 | 1 |
| Strep B carrier state complicating childbirth    | 1 | 1 |
| Newborn affected by maternal use tobacco         | 1 | 1 |
| Low birth weight newborn NEC 2000-2499 grams     | 1 | 1 |
| Preterm newborn weeks gestation NOS              | 1 | 1 |
| Preterm newborn gestational age 32 compl weeks   | 1 | 1 |
| Preterm newborn gestational age 35 compl weeks   | 1 | 1 |
| Respiratory distress newborn NOS                 | 1 | 1 |
| Chr resp disease orig in perinatal period NEC    | 1 | 1 |
| Atelectasis newborn NOS                          | 1 | 1 |
| Apnea newborn NEC                                | 1 | 1 |
| Neonatal bradycardia                             | 1 | 1 |
| Neonatal urinary tract infection                 | 1 | 1 |
| Intraventricular hemorrhage grade 1 newborn      | 1 | 1 |
| Anemia of prematurity                            | 1 | 1 |
| Neonatal hypoglycemia NEC                        | 1 | 1 |
| Breast engorgement newborn                       | 1 | 1 |
| Conditions integument specific to newborn NEC    | 1 | 1 |
| Other problems w newborn                         | 1 | 1 |
| Neonatal cerebral leukomalacia                   | 1 | 1 |
| Hypoxic ischemic encephalopathy NOS              | 1 | 1 |
| Feeding problems newborn NEC                     | 1 | 1 |
| Exposure to tobacco smoke in perinatal period    | 1 | 1 |
| Congenital cerebral cysts                        | 1 | 1 |
| Arnold-Chiari synd w/o spina bifida or hydroceph | 1 | 1 |
| Congenital malformation face & neck NOS          | 1 | 1 |
| Ventricular septal defect                        | 1 | 1 |
| Malformation coronary vessels                    | 1 | 1 |
| Specified congenital malformations heart NEC     | 1 | 1 |
| Atresia bile ducts                               | 1 | 1 |
| Congenital stenosis & stricture bile ducts       | 1 | 1 |
| Accessory kidney                                 | 1 | 1 |

|                                                  |   |   |
|--------------------------------------------------|---|---|
| Congenital dislocation left hip unilateral       | 1 | 1 |
| Congenital unstable hip                          | 1 | 1 |
| Congenital pes planus right foot                 | 1 | 1 |
| Congenital pes planus left foot                  | 1 | 1 |
| Congenital deformity spine                       | 1 | 1 |
| Congenital malformation low limb NEC incl pelvis | 1 | 1 |
| Fetal alcohol syndrome                           | 1 | 1 |
| Asplenia                                         | 1 | 1 |
| Specified congenital malformations NEC           | 1 | 1 |
| Fragile X chromosome                             | 1 | 1 |
| Epistaxis                                        | 1 | 1 |
| Shortness of breath                              | 1 | 1 |
| Forms dyspnea NEC                                | 1 | 1 |
| Sx & signs involv circulatory & resp systems NEC | 1 | 1 |
| Vomiting w/o nausea                              | 1 | 1 |
| Projectile vomiting                              | 1 | 1 |
| Dysphagia oral phase                             | 1 | 1 |
| Dysphagia pharyngeal phase                       | 1 | 1 |
| Dysphagia pharyngoesophageal phase               | 1 | 1 |
| Abdominal distension                             | 1 | 1 |
| Splenomegaly NEC                                 | 1 | 1 |
| Jaundice NOS                                     | 1 | 1 |
| Cyanosis                                         | 1 | 1 |
| Pallor                                           | 1 | 1 |
| Spontaneous ecchymoses                           | 1 | 1 |
| Unsteadiness on feet                             | 1 | 1 |
| Lack coordination NOS                            | 1 | 1 |
| Abnormal reflex                                  | 1 | 1 |
| Facial weakness                                  | 1 | 1 |
| Hematuria NOS                                    | 1 | 1 |
| Urinary incontinence NOS                         | 1 | 1 |
| Urgency urination                                | 1 | 1 |
| GCS score 3-8 at hospital admission              | 1 | 1 |
| Persistent vegetative state                      | 1 | 1 |
| Violent behavior                                 | 1 | 1 |
| Symptoms & sign involv appearance & behavior NEC | 1 | 1 |
| Aphasia                                          | 1 | 1 |
| Slurred speech                                   | 1 | 1 |

|                                                  |   |   |
|--------------------------------------------------|---|---|
| Fever presenting w CCE                           | 1 | 1 |
| Malaise NEC                                      | 1 | 1 |
| Complex febrile convulsions                      | 1 | 1 |
| Hemorrhage NEC                                   | 1 | 1 |
| Generalized edema                                | 1 | 1 |
| Edema NOS                                        | 1 | 1 |
| Generalized hyperhidrosis                        | 1 | 1 |
| Anorexia                                         | 1 | 1 |
| Underweight                                      | 1 | 1 |
| Hyperglycemia NOS                                | 1 | 1 |
| Abnormal findings blood chemistry NEC            | 1 | 1 |
| Abn findings NOS specimen org, syst & tiss NEC   | 1 | 1 |
| White matter disease NOS                         | 1 | 1 |
| Abnormal findings dxtic imaging liver & biliary  | 1 | 1 |
| Abn radiol find dxtic imag renal pelv uret blad  | 1 | 1 |
| Abnormal findings dxtic imaging body struct NEC  | 1 | 1 |
| Abnormal results function studies CNS NEC        | 1 | 1 |
| Abrasion scalp initial                           | 1 | 1 |
| Contusion right ear initial                      | 1 | 1 |
| Fracture vault skull initial closed fracture     | 1 | 1 |
| Concussion w/o loss consciousness initial        | 1 | 1 |
| Injury head NOS initial                          | 1 | 1 |
| Injury brachial plexus initial                   | 1 | 1 |
| Contusion back wall thorax NOS initial           | 1 | 1 |
| Fracture NOS shaft left femur initial closed fx  | 1 | 1 |
| Transv Dfx shaft lt femur subsq CLFX rout heal   | 1 | 1 |
| Fx NOS lower end left femur initial closed fx    | 1 | 1 |
| Torus fx lower end right femur initial closed fx | 1 | 1 |
| Fx NEC lower end left femur initial closed fx    | 1 | 1 |
| Fracture NOS femur NOS subsq CLFX w routine heal | 1 | 1 |
| Subluxation NOS left hip sequela                 | 1 | 1 |
| Dislocation NOS right hip initial                | 1 | 1 |
| Dislocation NOS left hip initial                 | 1 | 1 |
| Injury NOS femoral artery right leg initial      | 1 | 1 |
| Injuries NOS left ankle initial                  | 1 | 1 |
| Foreign body NOS larynx causing asphyx initial   | 1 | 1 |
| Foreign obj NEC resp tract NEC caus asphyx init  | 1 | 1 |
| Food resp tract part NOS causing asphyx initial  | 1 | 1 |

|                                                   |   |   |
|---------------------------------------------------|---|---|
| Adverse effect systemic antibiotics NOS initial   | 1 | 1 |
| Adverse effect sulfonamides initial               | 1 | 1 |
| Adverse effect glucocort & synth analogues subsq  | 1 | 1 |
| Adverse effect NSAID NEC initial                  | 1 | 1 |
| Poisoning by cannabis accidental initial          | 1 | 1 |
| Poisoning by benzodiazepines accidental initial   | 1 | 1 |
| Adv effect antiepilep & sed-hypn drug NEC initial | 1 | 1 |
| Pois antipark & centr musc-tone depr accid init   | 1 | 1 |
| Adv effect antipark & centr musc-tone depr init   | 1 | 1 |
| Adverse effect parasymph & spasmolyt NEC init     | 1 | 1 |
| Adverse effect antithrombotic drugs initial       | 1 | 1 |
| Adv effect local antifung/-INF/-infl drug init    | 1 | 1 |
| Adverse effect CAHI, BTD & diuretics NEC initial  | 1 | 1 |
| Poison drug, med & biol subst NOS accident init   | 1 | 1 |
| Adverse effect drug, med & biol subst NOS init    | 1 | 1 |
| Adverse effect immunoglobulin initial             | 1 | 1 |
| Child neglect or abandonment confirmed initial    | 1 | 1 |
| Child physical abuse suspected initial            | 1 | 1 |
| Allergy NOS initial                               | 1 | 1 |
| Infection NEC D/T central venous cath initial     | 1 | 1 |
| Infection NOS D/T central venous cath subsq       | 1 | 1 |
| Anaphylactic RXN D/T admin blood/products init    | 1 | 1 |
| Comp NEC infus, transfus & ther inject initial    | 1 | 1 |
| Disruption internal operation wound NEC initial   | 1 | 1 |
| Breakdown vascular dialysis catheter initial      | 1 | 1 |
| Displacement infusion catheter initial            | 1 | 1 |
| Mechanical comp NEC infusion catheter initial     | 1 | 1 |
| Mech comp NEC card & vasc dev & impl NEC initial  | 1 | 1 |
| INF&inflam D/T card&vasc dev/impl/graft NEC init  | 1 | 1 |
| Hemor D/T vasc prosth dev, implant & graft init   | 1 | 1 |
| Comp NEC vasc prosth dev, implant & graft init    | 1 | 1 |
| Comp NOS card/vasc prosth dev/impl/graft initial  | 1 | 1 |
| INF & infl react D/T indwell urethral cath init   | 1 | 1 |
| Comp NEC int ortho prosth dev, impl & graft init  | 1 | 1 |
| Displ GI prosth device, impl & graft NEC initial  | 1 | 1 |
| Pain D/T int prosth dev/impl/graft NEC init       | 1 | 1 |
| Thrombosis D/T int prosth dev/impl/grft NEC init  | 1 | 1 |
| Comp NOS int prosth device, impl & graft initial  | 1 | 1 |

|                                                  |   |   |
|--------------------------------------------------|---|---|
| Comp NEC following immunization NEC initial      | 1 | 1 |
| Anaphyl RXN D/T AdE correct drug/med initial     | 1 | 1 |
| P-cycle driv inj noncoll transp accid NTA init   | 1 | 1 |
| Fall level slip/trip/stumble w/o strike obj init | 1 | 1 |
| Fall from furniture NEC initial                  | 1 | 1 |
| Fall NEC from 1 level to another initial         | 1 | 1 |
| Fall NEC on same level initial                   | 1 | 1 |
| Striking against or struck by objects NEC init   | 1 | 1 |
| Overexert from prolonged static/awk post initial | 1 | 1 |
| Specified misadv during surg & med care NEC      | 1 | 1 |
| Prosth, impl & acces GE & urol dev w adv incid   | 1 | 1 |
| Medical devices NEC assoc w adverse incidents    | 1 | 1 |
| Impl artif dev caus abn RXN/late comp w/o misadv | 1 | 1 |
| Surg px NOS cause abn RXN/late comp w/o misadv   | 1 | 1 |
| Urin cath as cause abn RXN/late comp w/o misadv  | 1 | 1 |
| Med px NOS cause abn RXN/late comp w/o misadv    | 1 | 1 |
| Kitchen in non-instit resid NOS as PoO ext cause | 1 | 1 |
| Place NOS single family house as PoO ext cause   | 1 | 1 |
| Operating room of hospital as PoO external cause | 1 | 1 |
| Activity running                                 | 1 | 1 |
| Activity bike riding                             | 1 | 1 |
| Activity caregiving lifting                      | 1 | 1 |
| External cause status NEC                        | 1 | 1 |
| Encounter exam potential donor organ & tissue    | 1 | 1 |
| Encounter for hearing exam follow failed screen  | 1 | 1 |
| Encounter dental exam & clean w/o abn findings   | 1 | 1 |
| Encounter for specified special exams NEC        | 1 | 1 |
| Encount exam & observ follow alleged child abuse | 1 | 1 |
| Encounter for screen global developmental delays | 1 | 1 |
| Encounter for screening for eye & ear disorders  | 1 | 1 |
| Encounter for screening for cardiovasc disorders | 1 | 1 |
| Encounter for screening for disorder NEC         | 1 | 1 |
| Genetic carrier disease NEC                      | 1 | 1 |
| Resistance to penicillins                        | 1 | 1 |
| Contact w & expos to viral communic diseases NEC | 1 | 1 |
| Contact w & exposure to communicable disease NOS | 1 | 1 |
| Carrier infectious diseases NEC                  | 1 | 1 |
| Encounter adjust or removal myringotomy device   | 1 | 1 |



|                                                  |   |   |
|--------------------------------------------------|---|---|
| Encounter for antineoplastic immunotherapy       | 1 | 1 |
| Px & Tx not carried out pt left before seen HCP  | 1 | 1 |
| Problem related to primary support group NEC     | 1 | 1 |
| Prob related to psychosocial circumstances NEC   | 1 | 1 |
| Blood type NOS Rh negative                       | 1 | 1 |
| Sleep deprivation                                | 1 | 1 |
| Lack relaxation & leisure                        | 1 | 1 |
| Bed confinement status                           | 1 | 1 |
| Reduced mobility NEC                             | 1 | 1 |
| Contact w & expos to potential hazard body fluid | 1 | 1 |
| Long term use opiate analgesic                   | 1 | 1 |
| Family history malignant neoplasm breast         | 1 | 1 |
| Family history stroke                            | 1 | 1 |
| Family history arthritis                         | 1 | 1 |
| Family Hx cong malform, deform & chrom abn NEC   | 1 | 1 |
| Family Hx infectious & parasitic diseases NEC    | 1 | 1 |
| Personal history malignant neoplasm NOS          | 1 | 1 |
| Personal history MRSA infection                  | 1 | 1 |
| Pers Hx dis blood & -form org & immune mech      | 1 | 1 |
| Personal Hx TIA & cerebral infarct w/o residuals | 1 | 1 |
| Personal history diseases skin & subq tissue     | 1 | 1 |
| Personal history urinary calculi                 | 1 | 1 |
| Personal history cong malform integument & MS    | 1 | 1 |
| Acquired absence parts digest tract NEC          | 1 | 1 |
| Allergy to milk products                         | 1 | 1 |
| Nonmedicinal substance allergy status NEC        | 1 | 1 |
| Patient noncompliance w dietary regimen          | 1 | 1 |
| Patient noncompliance w medical Tx & regimen NEC | 1 | 1 |
| History falling                                  | 1 | 1 |
| Unspecified cystostomy status                    | 1 | 1 |
| Myringotomy tube status                          | 1 | 1 |
| C. difficile enteritis                           | 1 | 1 |
| Rotavirus enteritis                              | 1 | 1 |
| Mycobacterial dis NOS                            | 1 | 1 |
| Gram-neg septicemia NEC                          | 1 | 1 |
| Group D Strep infection                          | 1 | 1 |
| Other Staph infection                            | 1 | 1 |
| K. pneumoniae infect                             | 1 | 1 |

|                          |   |   |
|--------------------------|---|---|
| Proteus infection NOS    | 1 | 1 |
| Viral exanthem NOS       | 1 | 1 |
| Cytomegaloviral disease  | 1 | 1 |
| Resp syncytial virus     | 1 | 1 |
| Candidiasis NEC          | 1 | 1 |
| Protein-cal malnut NOS   | 1 | 1 |
| Vitamin D deficiency NOS | 1 | 1 |
| Nutrition deficiency NOS | 1 | 1 |
| Hyperosmolality          | 1 | 1 |
| Hyperpotassemia          | 1 | 1 |
| Disord bilirubin excret  | 1 | 1 |
| Mitochondrial metab dis  | 1 | 1 |
| Metabolism disorder NOS  | 1 | 1 |
| Chr graft-v-host disease | 1 | 1 |
| Iron def anemia NOS      | 1 | 1 |
| Not Defined              | 1 | 1 |
| Aplastic anemia NOS      | 1 | 1 |
| Anemia NOS               | 1 | 1 |
| Coag defect NEC & NOS    | 1 | 1 |
| 2nd thrombocytopenia NEC | 1 | 1 |
| Thrombocytopenia NOS     | 1 | 1 |
| Agranulocytosis          | 1 | 1 |
| Drug withdrawal          | 1 | 1 |
| Anxiety state NOS        | 1 | 1 |
| Anxiety state NEC        | 1 | 1 |
| Acute stress RXN NEC     | 1 | 1 |
| Expressive language dis  | 1 | 1 |
| Speech/language pbx NEC  | 1 | 1 |
| Cerebral lipidoses       | 1 | 1 |
| Obstr hydrocephalus      | 1 | 1 |
| Cereb degeneration NOS   | 1 | 1 |
| Acute postop pain NEC    | 1 | 1 |
| Acute pain NEC           | 1 | 1 |
| Idio periph neuropat NOS | 1 | 1 |
| Myoneural disorders NOS  | 1 | 1 |
| Cong hered musc dyst     | 1 | 1 |
| Macular degeneration NOS | 1 | 1 |
| Cataract NEC             | 1 | 1 |

|                          |   |   |
|--------------------------|---|---|
| Hypermetropia            | 1 | 1 |
| Astigmatism NOS          | 1 | 1 |
| Visual disturbances NEC  | 1 | 1 |
| Legal blindness-USA def  | 1 | 1 |
| Visual loss NOS          | 1 | 1 |
| Exposure keratoconjunct  | 1 | 1 |
| Conjunctivitis NOS       | 1 | 1 |
| Conjunctiva vasc anomaly | 1 | 1 |
| Blepharitis NOS          | 1 | 1 |
| Hordeolum externum       | 1 | 1 |
| Lagophthalmos NOS        | 1 | 1 |
| Optic nerve disorder NEC | 1 | 1 |
| Exotropia NOS            | 1 | 1 |
| Intermitt heterotrop NOS | 1 | 1 |
| Prog ext ophthalmoplegia | 1 | 1 |
| Scleral disorder NEC     | 1 | 1 |
| Nystagmus NOS            | 1 | 1 |
| INF otitis externa NOS   | 1 | 1 |
| NOM NOS                  | 1 | 1 |
| Mitral valve disorder    | 1 | 1 |
| Chronic systolic HF      | 1 | 1 |
| Intracranial hemor NOS   | 1 | 1 |
| Hypotension NOS          | 1 | 1 |
| Chronic rhinitis         | 1 | 1 |
| Chronic sinusitis NOS    | 1 | 1 |
| Hypertrophy adenoids     | 1 | 1 |
| Allergic rhinitis NEC    | 1 | 1 |
| Laryngeal stenosis       | 1 | 1 |
| Viral pneumonia NEC      | 1 | 1 |
| Influenza w pneumonia    | 1 | 1 |
| Influenza D/T novel H1N1 | 1 | 1 |
| Bronchitis NOS           | 1 | 1 |
| Chronic airway obstr NEC | 1 | 1 |
| PI NEC follow traum/surg | 1 | 1 |
| Tracheostomy mech comp   | 1 | 1 |
| Resp system disease NEC  | 1 | 1 |
| Tooth eruption disturb   | 1 | 1 |
| Periapical abscess       | 1 | 1 |

|                          |   |   |
|--------------------------|---|---|
| Chr gingiv-plaque ind    | 1 | 1 |
| Periodontal disease NEC  | 1 | 1 |
| Mucositis D/T drugs NEC  | 1 | 1 |
| Tongue disorder NEC      | 1 | 1 |
| Gastritis NOS w hemor    | 1 | 1 |
| Gastroparesis            | 1 | 1 |
| Gastrostomy infection    | 1 | 1 |
| Stomach funct disord NEC | 1 | 1 |
| Colo/enterstmy mech comp | 1 | 1 |
| Acute kidney failure NOS | 1 | 1 |
| Bladder disorder NEC     | 1 | 1 |
| Hematuria NOS            | 1 | 1 |
| Balanoposthitis          | 1 | 1 |
| Local skin infection NOS | 1 | 1 |
| Erythemsquamous derm NEC | 1 | 1 |
| Erythematous cond NOS    | 1 | 1 |
| Abnormal granulation NEC | 1 | 1 |
| Skin disorders NEC       | 1 | 1 |
| Jt contracture-pelvis    | 1 | 1 |
| Jt contracture-lower leg | 1 | 1 |
| Jt contracture-ankle     | 1 | 1 |
| Jt contracture-site NEC  | 1 | 1 |
| Devel dislocat-pelvis    | 1 | 1 |
| Joint pain-pelvis        | 1 | 1 |
| Backache NOS             | 1 | 1 |
| Tendon contracture       | 1 | 1 |
| Muscle/ligament dis NEC  | 1 | 1 |
| Acq ankle-foot def NEC   | 1 | 1 |
| Reduction deform brain   | 1 | 1 |
| Cong hip disloc-bilat    | 1 | 1 |
| Cong hip sublux-unilat   | 1 | 1 |
| Pectus carinatum         | 1 | 1 |
| Anomaly of spine NEC     | 1 | 1 |
| Cong skin pigment anomal | 1 | 1 |
| Autosomal anomalies NEC  | 1 | 1 |
| Perinatal chr resp dis   | 1 | 1 |
| Sleep disturbance NOS    | 1 | 1 |
| Malaise & fatigue NEC    | 1 | 1 |

|                          |   |   |
|--------------------------|---|---|
| Fussy infant             | 1 | 1 |
| Abnormality of gait      | 1 | 1 |
| Edema                    | 1 | 1 |
| Jaundice NOS             | 1 | 1 |
| Abnormal weight gain     | 1 | 1 |
| Aphasia                  | 1 | 1 |
| Speech disturbance NEC   | 1 | 1 |
| Dysarthria               | 1 | 1 |
| Speech disturbance NEC   | 1 | 1 |
| Epistaxis                | 1 | 1 |
| Cardiogenic shock        | 1 | 1 |
| Resp abnormality NOS     | 1 | 1 |
| Tachypnea                | 1 | 1 |
| Nausea w vomiting        | 1 | 1 |
| Dysphagia                | 1 | 1 |
| Dysphagia-oral           | 1 | 1 |
| Dysphagia-PHAR           | 1 | 1 |
| Retention of urine NOS   | 1 | 1 |
| Abn serum enzyme lev NEC | 1 | 1 |
| Abn arterial blood gases | 1 | 1 |
| Abn urine findings NEC   | 1 | 1 |
| Nonspecific abnormal EEG | 1 | 1 |
| Abn CNS funct study NEC  | 1 | 1 |
| Nonspecific abn EKG/ECG  | 1 | 1 |
| Ankle sprain NOS         | 1 | 1 |
| Open wound of forehead   | 1 | 1 |
| Open WND finger          | 1 | 1 |
| Contusion head X eye     | 1 | 1 |
| Head injury NOS          | 1 | 1 |
| Pois-skel muscle relax   | 1 | 1 |
| Sepsis                   | 1 | 1 |
| Infect D/T vasc device   | 1 | 1 |
| Comp stem cell transpl   | 1 | 1 |
| Vent assoc pneumonia     | 1 | 1 |
| Non-healing surg WND     | 1 | 1 |
| Oth spec postop comp NEC | 1 | 1 |
| Bloodstream INF D/T CVC  | 1 | 1 |
| Local infection D/T CVC  | 1 | 1 |

|                          |   |   |
|--------------------------|---|---|
| Not Defined              | 1 | 1 |
| Ext cause status NEC     | 1 | 1 |
| Activity NEC             | 1 | 1 |
| Home accidents           | 1 | 1 |
| Accident in public bldg  | 1 | 1 |
| Accident in place NOS    | 1 | 1 |
| Acc pois-MS/resp agnt    | 1 | 1 |
| Abn RXN-org transplant   | 1 | 1 |
| Abn RXN-surgical px NEC  | 1 | 1 |
| Abn RXN-surgical px NOS  | 1 | 1 |
| Fall from furniture NEC  | 1 | 1 |
| Fall-1 level to oth NEC  | 1 | 1 |
| Fall NOS                 | 1 | 1 |
| Acc-cutting instr NEC    | 1 | 1 |
| Adv eff penicillins      | 1 | 1 |
| Adv eff cephalosporin    | 1 | 1 |
| Adv eff antibiotic NOS   | 1 | 1 |
| Adv eff corticosteroids  | 1 | 1 |
| HIB vaccine              | 1 | 1 |
| Varicella vaccine        | 1 | 1 |
| DTP + polio vaccine      | 1 | 1 |
| MMR vaccine              | 1 | 1 |
| Disease comb vaccine NEC | 1 | 1 |
| Hx INF/parasit dis NEC   | 1 | 1 |
| Hx TIA/infarct w/o resid | 1 | 1 |
| Hx cong hrt/circ malform | 1 | 1 |
| Hx sulfonamides allergy  | 1 | 1 |
| Hx food allergy NEC      | 1 | 1 |
| Hx latex allergy         | 1 | 1 |
| Hx surg other organs     | 1 | 1 |
| Family hx CA NEC         | 1 | 1 |
| Family hx CV disease NEC | 1 | 1 |
| Fam hx blood disord NEC  | 1 | 1 |
| Cystostomy status NEC    | 1 | 1 |
| Arthrodesis status       | 1 | 1 |
| Acq absence organ NEC    | 1 | 1 |
| Wheelchair dependence    | 1 | 1 |
| Bed confinement status   | 1 | 1 |

|                          |   |   |
|--------------------------|---|---|
| Surg aftercare-transpl   | 1 | 1 |
| Surg aftercare-GU syst   | 1 | 1 |
| No px/reasons NEC        | 1 | 1 |
| Admin encounter NEC      | 1 | 1 |
| Obs suspect CV disease   | 1 | 1 |
| Obs suspect cond NEC     | 1 | 1 |
| Preop examination NEC    | 1 | 1 |
| Preop examination NOS    | 1 | 1 |
| Def anemia screening NEC | 1 | 1 |

| Px Version | Px Code (ICD) | Px Title (ICD)                                                                         |
|------------|---------------|----------------------------------------------------------------------------------------|
| 0          | 3E0G76Z       | Introduction of Nutritional Substance into Upper GI, Via Natural or Artificial Opening |
| 0          | 009U3ZX       | Drainage of Spinal Canal, Percutaneous Approach, Diagnostic                            |
| 0          | 02HV33Z       | Insertion of Infusion Device into Superior Vena Cava, Percutaneous Approach            |
| 0          | 0DH64UZ       | Insertion of Feeding Device into Stomach, Percutaneous Endoscopic Approach             |
| 0          | 30243R1       | Transfusion of Nonautologous Platelets into Central Vein, Percutaneous Approach        |
| 0          | 3E0436Z       | Introduction of Nutritional Substance into Central Vein, Percutaneous Approach         |
| 0          | 0DH63UZ       | Insertion of Feeding Device into Stomach, Percutaneous Approach                        |
| 0          | 30243S1       | Transfusion of Nonautologous Globulin into Central Vein, Percutaneous Approach         |
| 0          | 30243N1       | Transfusion of Nonautologous Red Blood Cells into Central Vein, Percutaneous Ap        |
| 0          | 0DV44ZZ       | Restriction of Esophagogastric Junction, Percutaneous Endoscopic Approach              |
| 0          | 30243X3       | Transfusion of Allogeneic Unrelated Cord Blood Stem Cells into Central Vein, Percu     |
| 0          | B030ZZZ       | Magnetic Resonance Imaging (MRI) of Brain                                              |
| 0          | 02H633Z       | Insertion of Infusion Device into Right Atrium, Percutaneous Approach                  |
| 0          | 0JH60XZ       | Insertion of Tunneled Vascular Access Device into Chest Subcutaneous Tissue and        |
| 0          | 3E04305       | Introduction of Other Antineoplastic into Central Vein, Percutaneous Approach          |
| 0          | 4A10X4Z       | Monitoring of Central Nervous Electrical Activity, External Approach                   |
| 9          | 0331          | Spinal tap                                                                             |
| 0          | 0HB5XZX       | Excision of Chest Skin, External Approach, Diagnostic                                  |
| 0          | 0BH17EZ       | Insertion of Endotracheal Airway into Trachea, Via Natural or Artificial Opening       |
| 0          | 0D20XUZ       | Change Feeding Device in Upper Intestinal Tract, External Approach                     |
| 0          | 5A1945Z       | Respiratory Ventilation, 24-96 Consecutive Hours                                       |
| 0          | 5A09357       | Assistance with Respiratory Ventilation, Less than 24 Consecutive Hours, Continuo      |
| 9          | 9904          | Transfusion of packed cells                                                            |
| 0          | 02PY33Z       | Removal of Infusion Device from Great Vessel, Percutaneous Approach                    |
| 0          | 5A1955Z       | Respiratory Ventilation, Greater than 96 Consecutive Hours                             |
| 0          | B030Y0Z       | Magnetic Resonance Imaging (MRI) of Brain using Other Contrast, Unenhanced an          |
| 9          | 3893          | Venous catheterization, not elsewhere classified                                       |
| 0          | 02PYX3Z       | Removal of Infusion Device from Great Vessel, External Approach                        |
| 0          | 0BH18EZ       | Insertion of Endotracheal Airway into Trachea, Via Natural or Artificial Opening End   |
| 0          | 0CJS8ZZ       | Inspection of Larynx, Via Natural or Artificial Opening Endoscopic                     |
| 0          | 0JH63XZ       | Insertion of Tunneled Vascular Access Device into Chest Subcutaneous Tissue and        |
| 0          | 0JPT0XZ       | Removal of Tunneled Vascular Access Device from Trunk Subcutaneous Tissue ar           |
| 0          | 30233N1       | Transfusion of Nonautologous Red Blood Cells into Peripheral Vein, Percutaneous        |
| 0          | 30243P1       | Transfusion of Nonautologous Frozen Red Cells into Central Vein, Percutaneous A        |
| 0          | 30243Y3       | Transfusion of Allogeneic Unrelated Hematopoietic Stem Cells into Central Vein, Pe     |
| 0          | 3E0H76Z       | Introduction of Nutritional Substance into Lower GI, Via Natural or Artificial Opening |
| 0          | 5A09457       | Assistance with Respiratory Ventilation, 24-96 Consecutive Hours, Continuous Pos       |



|   |         |                                                                                        |
|---|---------|----------------------------------------------------------------------------------------|
| 9 | 3142    | Laryngoscopy and other tracheoscopy                                                    |
| 9 | 4319    | Other gastrostomy                                                                      |
| 9 | 8605    | Incision with removal of foreign body or device from skin and subcutaneous tissue      |
| 9 | 9390    | #MULTIVALUE                                                                            |
| 9 | 966     | Enteral infusion of concentrated nutritional substances                                |
| 9 | 9671    | #MULTIVALUE                                                                            |
| 9 | 9915    | Parenteral infusion of concentrated nutritional substances                             |
| 0 | 0BJ08ZZ | Inspection of Tracheobronchial Tree, Via Natural or Artificial Opening Endoscopic      |
| 0 | 0DH67UZ | Insertion of Feeding Device into Stomach, Via Natural or Artificial Opening            |
| 0 | 30233R1 | Transfusion of Nonautologous Platelets into Peripheral Vein, Percutaneous Approach     |
| 0 | 30233S1 | Transfusion of Nonautologous Globulin into Peripheral Vein, Percutaneous Approach      |
| 0 | 30243Q1 | Transfusion of Nonautologous White Cells into Central Vein, Percutaneous Approach      |
| 0 | 3E0336Z | Introduction of Nutritional Substance into Peripheral Vein, Percutaneous Approach      |
| 0 | 4A133B1 | Monitoring of Arterial Pressure, Peripheral, Percutaneous Approach                     |
| 0 | 5A1935Z | Respiratory Ventilation, Less than 24 Consecutive Hours                                |
| 0 | 8E023DZ | Near Infrared Spectroscopy of Circulatory System, Percutaneous Approach                |
| 0 | B03BZZZ | Magnetic Resonance Imaging (MRI) of Spinal Cord                                        |
| 9 | 0092    | Transplant from live non-related donor                                                 |
| 9 | 3323    | Other bronchoscopy                                                                     |
| 9 | 4467    | Laparoscopic procedures for creation of esophagogastric sphincteric competence         |
| 9 | 8891    | Magnetic resonance imaging of brain and brain stem                                     |
| 9 | 9604    | Insertion of endotracheal tube                                                         |
| 9 | 9672    | Continuous invasive mechanical ventilation for 96 consecutive hours or more            |
| 9 | 9905    | Transfusion of platelets                                                               |
| 0 | 06H033Z | Insertion of Infusion Device into Inferior Vena Cava, Percutaneous Approach            |
| 0 | 0CTPXZZ | Resection of Tonsils, External Approach                                                |
| 0 | 0CTQXZZ | Resection of Adenoids, External Approach                                               |
| 0 | 0DB68ZX | Excision of Stomach, Via Natural or Artificial Opening Endoscopic, Diagnostic          |
| 0 | 0DB78ZX | Excision of Stomach, Pylorus, Via Natural or Artificial Opening Endoscopic, Diagnostic |
| 0 | 0DBN8ZX | Excision of Sigmoid Colon, Via Natural or Artificial Opening Endoscopic, Diagnostic    |
| 0 | 0DHA7UZ | Insertion of Feeding Device into Jejunum, Via Natural or Artificial Opening            |
| 0 | 0WP803Z | Removal of Infusion Device from Chest Wall, Open Approach                              |
| 0 | 8E0ZXY6 | Isolation                                                                              |
| 9 | 232     | Restoration of tooth by filling                                                        |
| 9 | 2341    | Application of crown                                                                   |
| 9 | 3897    | Central venous catheter placement with guidance                                        |
| 9 | 4105    | Allogeneic hematopoietic stem cell transplant without purging                          |
| 9 | 4311    | Percutaneous [endoscopic] gastrostomy [PEG]                                            |

|   |         |                                                                                                      |
|---|---------|------------------------------------------------------------------------------------------------------|
| 9 | 8919    | Video and radio-telemetered electroencephalographic monitoring                                       |
| 9 | 9396    | Other oxygen enrichment                                                                              |
| 9 | 9702    | Replacement of gastrostomy tube                                                                      |
| 9 | 9914    | Injection or infusion of immunoglobulin                                                              |
| 9 | 9925    | Injection or infusion of cancer chemotherapeutic substance                                           |
| 9 | 9929    | Injection or infusion of other therapeutic or prophylactic substance                                 |
| 0 | 00JU3ZZ | Inspection of Spinal Canal, Percutaneous Approach                                                    |
| 0 | 03HY32Z | Insertion of Monitoring Device into Upper Artery, Percutaneous Approach                              |
| 0 | 05HD33Z | Insertion of Infusion Device into Right Cephalic Vein, Percutaneous Approach                         |
| 0 | 05HM33Z | Insertion of Infusion Device into Right Internal Jugular Vein, Percutaneous Approach                 |
| 0 | 05PYX3Z | Removal of Infusion Device from Upper Vein, External Approach                                        |
| 0 | 0B110F4 | Bypass Trachea to Cutaneous with Tracheostomy Device, Open Approach                                  |
| 0 | 0B21XFZ | Change Tracheostomy Device in Trachea, External Approach                                             |
| 0 | 0CDWXZ1 | Extraction of Upper Tooth, Multiple, External Approach                                               |
| 0 | 0CRWXJ1 | Replacement of Upper Tooth, Multiple, with Synthetic Substitute, External Approach                   |
| 0 | 0CRXXJ1 | Replacement of Lower Tooth, Multiple, with Synthetic Substitute, External Approach                   |
| 0 | 0D2DXUZ | Change Feeding Device in Lower Intestinal Tract, External Approach                                   |
| 0 | 0DB38ZX | Excision of Lower Esophagus, Via Natural or Artificial Opening Endoscopic, Diagnostic                |
| 0 | 0DBP8ZX | Excision of Rectum, Via Natural or Artificial Opening Endoscopic, Diagnostic                         |
| 0 | 0DHA3UZ | Insertion of Feeding Device into Jejunum, Percutaneous Approach                                      |
| 0 | 0DJ08ZZ | Inspection of Upper Intestinal Tract, Via Natural or Artificial Opening Endoscopic                   |
| 0 | 0FB03ZX | Excision of Liver, Percutaneous Approach, Diagnostic                                                 |
| 0 | 0HBHXZX | Excision of Right Upper Leg Skin, External Approach, Diagnostic                                      |
| 0 | 0HQ7XZZ | Repair Abdomen Skin, External Approach                                                               |
| 0 | 0JPT3XZ | Removal of Tunneled Vascular Access Device from Trunk Subcutaneous Tissue and                        |
| 0 | 0JPTXXZ | Removal of Tunneled Vascular Access Device from Trunk Subcutaneous Tissue and                        |
| 0 | 0L8N0ZZ | Division of Right Lower Leg Tendon, Open Approach                                                    |
| 0 | 0LXN0ZZ | Transfer Right Lower Leg Tendon, Open Approach                                                       |
| 0 | 0QS906Z | Reposition Left Femoral Shaft with Intramedullary Internal Fixation Device, Open Approach            |
| 0 | 0QSG04Z | Reposition Right Tibia with Internal Fixation Device, Open Approach                                  |
| 0 | 0YQA0ZZ | Repair Bilateral Inguinal Region, Open Approach                                                      |
| 0 | 30243K1 | Transfusion of Nonautologous Frozen Plasma into Central Vein, Percutaneous Approach                  |
| 0 | 30243X1 | Transfusion of Nonautologous Cord Blood Stem Cells into Central Vein, Percutaneous Approach          |
| 0 | 30243X4 | Transfusion of Allogeneic Unspecified Cord Blood Stem Cells into Central Vein, Percutaneous Approach |
| 0 | 3E023GC | Introduction of Other Therapeutic Substance into Muscle, Percutaneous Approach                       |
| 0 | 3E03305 | Introduction of Other Antineoplastic into Peripheral Vein, Percutaneous Approach                     |
| 0 | 3E043GC | Introduction of Other Therapeutic Substance into Central Vein, Percutaneous Approach                 |
| 0 | 3E043WL | Introduction of Immunosuppressive into Central Vein, Percutaneous Approach                           |

|   |         |                                                                                     |
|---|---------|-------------------------------------------------------------------------------------|
| 0 | 3E0DXGC | Introduction of Other Therapeutic Substance into Mouth and Pharynx, External App    |
| 0 | 4A00X4Z | Measurement of Central Nervous Electrical Activity, External Approach               |
| 0 | 4A133J1 | Monitoring of Arterial Pulse, Peripheral, Percutaneous Approach                     |
| 0 | 4A1ZXQZ | Monitoring of Sleep, External Approach                                              |
| 0 | 5A09557 | Assistance with Respiratory Ventilation, Greater than 96 Consecutive Hours, Contir  |
| 0 | B030YZZ | Magnetic Resonance Imaging (MRI) of Brain using Other Contrast                      |
| 0 | B246ZZZ | Ultrasonography of Right and Left Heart                                             |
| 0 | B5181ZA | Fluoroscopy of Superior Vena Cava using Low Osmolar Contrast, Guidance              |
| 0 | B548ZZA | Ultrasonography of Superior Vena Cava, Guidance                                     |
| 0 | BD16YZZ | Fluoroscopy of Upper GI and Small Bowel using Other Contrast                        |
| 0 | F00ZJWZ | Instrumental Swallowing and Oral Function Assessment using Swallowing Equipme       |
| 9 | 042     | Destruction of cranial and peripheral nerves                                        |
| 9 | 2301    | Extraction of deciduous tooth                                                       |
| 9 | 2309    | Extraction of other tooth                                                           |
| 9 | 2349    | Other dental restoration                                                            |
| 9 | 3169    | Other repair of larynx                                                              |
| 9 | 3891    | Arterial catheterization                                                            |
| 9 | 4106    | Cord blood stem cell transplant                                                     |
| 9 | 4516    | Esophagogastroduodenoscopy [EGD] with closed biopsy                                 |
| 9 | 8312    | Adductor tenotomy of hip                                                            |
| 9 | 8917    | Polysomnogram                                                                       |
| 9 | 9339    | Other physical therapy                                                              |
| 9 | 9383    | Occupational therapy                                                                |
| 9 | 9703    | Replacement of tube or enterostomy device of small intestine                        |
| 0 | 00163J6 | Bypass Cerebral Ventricle to Peritoneal Cavity with Synthetic Substitute, Percutane |
| 0 | 009600Z | Drainage of Cerebral Ventricle with Drainage Device, Open Approach                  |
| 0 | 009U3ZZ | Drainage of Spinal Canal, Percutaneous Approach                                     |
| 0 | 02H733Z | Insertion of Infusion Device into Left Atrium, Percutaneous Approach                |
| 0 | 02HN0JZ | Insertion of Pacemaker Lead into Pericardium, Open Approach                         |
| 0 | 02PA33Z | Removal of Infusion Device from Heart, Percutaneous Approach                        |
| 0 | 02PAX3Z | Removal of Infusion Device from Heart, External Approach                            |
| 0 | 04H133Z | Insertion of Infusion Device into Celiac Artery, Percutaneous Approach              |
| 0 | 04H533Z | Insertion of Infusion Device into Superior Mesenteric Artery, Percutaneous Approac  |
| 0 | 04HB33Z | Insertion of Infusion Device into Inferior Mesenteric Artery, Percutaneous Approach |
| 0 | 04HY32Z | Insertion of Monitoring Device into Lower Artery, Percutaneous Approach             |
| 0 | 05H533Z | Insertion of Infusion Device into Right Subclavian Vein, Percutaneous Approach      |
| 0 | 05H633Z | Insertion of Infusion Device into Left Subclavian Vein, Percutaneous Approach       |
| 0 | 05HC33Z | Insertion of Infusion Device into Left Basilic Vein, Percutaneous Approach          |

|   |         |                                                                                     |
|---|---------|-------------------------------------------------------------------------------------|
| 0 | 05HG33Z | Insertion of Infusion Device into Right Hand Vein, Percutaneous Approach            |
| 0 | 05PY33Z | Removal of Infusion Device from Upper Vein, Percutaneous Approach                   |
| 0 | 06HN33Z | Insertion of Infusion Device into Left Femoral Vein, Percutaneous Approach          |
| 0 | 06L38CZ | Occlusion of Esophageal Vein with Extraluminal Device, Via Natural or Artificial Op |
| 0 | 06PYX3Z | Removal of Infusion Device from Lower Vein, External Approach                       |
| 0 | 099500Z | Drainage of Right Middle Ear with Drainage Device, Open Approach                    |
| 0 | 099600Z | Drainage of Left Middle Ear with Drainage Device, Open Approach                     |
| 0 | 09J73ZZ | Inspection of Right Tympanic Membrane, Percutaneous Approach                        |
| 0 | 09J83ZZ | Inspection of Left Tympanic Membrane, Percutaneous Approach                         |
| 0 | 09P870Z | Removal of Drainage Device from Left Tympanic Membrane, Via Natural or Artificia    |
| 0 | 0B948ZX | Drainage of Right Upper Lobe Bronchus, Via Natural or Artificial Opening Endoscop   |
| 0 | 0B968ZX | Drainage of Right Lower Lobe Bronchus, Via Natural or Artificial Opening Endoscop   |
| 0 | 0B9B8ZX | Drainage of Left Lower Lobe Bronchus, Via Natural or Artificial Opening Endoscop    |
| 0 | 0B9D8ZX | Drainage of Right Middle Lung Lobe, Via Natural or Artificial Opening Endoscopic, I |
| 0 | 0B9F8ZX | Drainage of Right Lower Lung Lobe, Via Natural or Artificial Opening Endoscopic, D  |
| 0 | 0B9G8ZX | Drainage of Left Upper Lung Lobe, Via Natural or Artificial Opening Endoscopic, Di  |
| 0 | 0BP1XDZ | Removal of Intraluminal Device from Trachea, External Approach                      |
| 0 | 0CCWXZ1 | Extirpation of Matter from Upper Tooth, Multiple, External Approach                 |
| 0 | 0CCXXZ1 | Extirpation of Matter from Lower Tooth, Multiple, External Approach                 |
| 0 | 0CDXXZ0 | Extraction of Lower Tooth, Single, External Approach                                |
| 0 | 0CDXXZ1 | Extraction of Lower Tooth, Multiple, External Approach                              |
| 0 | 0CQXXZ0 | Repair of Lower Tooth, Single, External Approach                                    |
| 0 | 0CRW0J0 | Replacement of Upper Tooth, Single, with Synthetic Substitute, Open Approach        |
| 0 | 0CRWXJ0 | Replacement of Upper Tooth, Single, with Synthetic Substitute, External Approach    |
| 0 | 0D164Z4 | Bypass Stomach to Cutaneous, Percutaneous Endoscopic Approach                       |
| 0 | 0D168ZA | Bypass Stomach to Jejunum, Via Natural or Artificial Opening Endoscopic             |
| 0 | 0D558ZZ | Destruction of Esophagus, Via Natural or Artificial Opening Endoscopic              |
| 0 | 0D9670Z | Drainage of Stomach with Drainage Device, Via Natural or Artificial Opening         |
| 0 | 0DB28ZX | Excision of Middle Esophagus, Via Natural or Artificial Opening Endoscopic, Diagn   |
| 0 | 0DB98ZX | Excision of Duodenum, Via Natural or Artificial Opening Endoscopic, Diagnostic      |
| 0 | 0DBB8ZX | Excision of Ileum, Via Natural or Artificial Opening Endoscopic, Diagnostic         |
| 0 | 0DBH8ZX | Excision of Cecum, Via Natural or Artificial Opening Endoscopic, Diagnostic         |
| 0 | 0DBK8ZX | Excision of Ascending Colon, Via Natural or Artificial Opening Endoscopic, Diagnos  |
| 0 | 0DBL8ZX | Excision of Transverse Colon, Via Natural or Artificial Opening Endoscopic, Diagn   |
| 0 | 0DBM8ZX | Excision of Descending Colon, Via Natural or Artificial Opening Endoscopic, Diagn   |
| 0 | 0DH60UZ | Insertion of Feeding Device into Stomach, Open Approach                             |
| 0 | 0DH673Z | Insertion of Infusion Device into Stomach, Via Natural or Artificial Opening        |
| 0 | 0DJ07ZZ | Inspection of Upper Intestinal Tract, Via Natural or Artificial Opening             |

|   |         |                                                                                                        |
|---|---------|--------------------------------------------------------------------------------------------------------|
| 0 | 0DP6XUZ | Removal of Feeding Device from Stomach, External Approach                                              |
| 0 | 0DQM0ZZ | Repair Descending Colon, Open Approach                                                                 |
| 0 | 0DQP0ZZ | Repair Rectum, Open Approach                                                                           |
| 0 | 0DW08UZ | Revision of Feeding Device in Upper Intestinal Tract, Via Natural or Artificial Opening                |
| 0 | 0F190ZB | Bypass Common Bile Duct to Small Intestine, Open Approach                                              |
| 0 | 0FB00ZX | Excision of Liver, Open Approach, Diagnostic                                                           |
| 0 | 0HB0XZZ | Excision of Scalp Skin, External Approach                                                              |
| 0 | 0HB4XZX | Excision of Neck Skin, External Approach, Diagnostic                                                   |
| 0 | 0HB6XZX | Excision of Back Skin, External Approach, Diagnostic                                                   |
| 0 | 0HB7XZX | Excision of Abdomen Skin, External Approach, Diagnostic                                                |
| 0 | 0HBAXZX | Excision of Inguinal Skin, External Approach, Diagnostic                                               |
| 0 | 0HQ9XZZ | Repair Perineum Skin, External Approach                                                                |
| 0 | 0J2TXYZ | Change Other Device in Trunk Subcutaneous Tissue and Fascia, External Approach                         |
| 0 | 0J540ZZ | Destruction of Right Neck Subcutaneous Tissue and Fascia, Open Approach                                |
| 0 | 0J8Q0ZZ | Division of Right Foot Subcutaneous Tissue and Fascia, Open Approach                                   |
| 0 | 0J8R0ZZ | Division of Left Foot Subcutaneous Tissue and Fascia, Open Approach                                    |
| 0 | 0JB80ZX | Excision of Abdomen Subcutaneous Tissue and Fascia, Open Approach, Diagnostic                          |
| 0 | 0JH604Z | Insertion of Pacemaker, Single Chamber into Chest Subcutaneous Tissue and Fascia                       |
| 0 | 0JHL3XZ | Insertion of Tunneled Vascular Access Device into Right Upper Leg Subcutaneous Tissue and Fascia       |
| 0 | 0JHM3XZ | Insertion of Tunneled Vascular Access Device into Left Upper Leg Subcutaneous Tissue and Fascia        |
| 0 | 0JNR0ZZ | Release Left Foot Subcutaneous Tissue and Fascia, Open Approach                                        |
| 0 | 0JPT3WZ | Removal of Totally Implantable Vascular Access Device from Trunk Subcutaneous Tissue and Fascia        |
| 0 | 0JQ80ZZ | Repair Abdomen Subcutaneous Tissue and Fascia, Open Approach                                           |
| 0 | 0KXS0ZZ | Transfer Right Lower Leg Muscle, Open Approach                                                         |
| 0 | 0L8P0ZZ | Division of Left Lower Leg Tendon, Open Approach                                                       |
| 0 | 0L8T0ZZ | Division of Left Ankle Tendon, Open Approach                                                           |
| 0 | 0LNV0ZZ | Release Right Foot Tendon, Open Approach                                                               |
| 0 | 0LXP0ZZ | Transfer Left Lower Leg Tendon, Open Approach                                                          |
| 0 | 0LXT0ZZ | Transfer Left Ankle Tendon, Open Approach                                                              |
| 0 | 0QBM0ZZ | Excision of Left Tarsal, Open Approach                                                                 |
| 0 | 0QH835Z | Insertion of External Fixation Device into Right Femoral Shaft, Percutaneous Approach                  |
| 0 | 0QH935Z | Insertion of External Fixation Device into Left Femoral Shaft, Percutaneous Approach                   |
| 0 | 0QPQ04Z | Removal of Internal Fixation Device from Right Toe Phalanx, Open Approach                              |
| 0 | 0QPR04Z | Removal of Internal Fixation Device from Left Toe Phalanx, Open Approach                               |
| 0 | 0QS806Z | Reposition Right Femoral Shaft with Intramedullary Internal Fixation Device, Open Approach             |
| 0 | 0QSJ04Z | Reposition Right Fibula with Internal Fixation Device, Open Approach                                   |
| 0 | 0QSL0ZZ | Reposition Right Tarsal, Open Approach                                                                 |
| 0 | 0RG8071 | Fusion of 8 or more Thoracic Vertebral Joints with Autologous Tissue Substitute, Percutaneous Approach |

|   |         |                                                                                         |
|---|---------|-----------------------------------------------------------------------------------------|
| 0 | 0RGA071 | Fusion of Thoracolumbar Vertebral Joint with Autologous Tissue Substitute, Posterior    |
| 0 | 0SG10A1 | Fusion of 2 or more Lumbar Vertebral Joints with Interbody Fusion Device, Posterior     |
| 0 | 0SG3071 | Fusion of Lumbosacral Joint with Autologous Tissue Substitute, Posterior Approach       |
| 0 | 0SG704Z | Fusion of Right Sacroiliac Joint with Internal Fixation Device, Open Approach           |
| 0 | 0SG804Z | Fusion of Left Sacroiliac Joint with Internal Fixation Device, Open Approach            |
| 0 | 0SGP0ZZ | Fusion of Right Toe Phalangeal Joint, Open Approach                                     |
| 0 | 0SGQ04Z | Fusion of Left Toe Phalangeal Joint with Internal Fixation Device, Open Approach        |
| 0 | 0SNG0ZZ | Release Left Ankle Joint, Open Approach                                                 |
| 0 | 0T1B0ZD | Bypass Bladder to Cutaneous, Open Approach                                              |
| 0 | 0TJB8ZZ | Inspection of Bladder, Via Natural or Artificial Opening Endoscopic                     |
| 0 | 0UT04ZZ | Resection of Right Ovary, Percutaneous Endoscopic Approach                              |
| 0 | 0VBL0ZZ | Excision of Bilateral Epididymis, Open Approach                                         |
| 0 | 0VSC0ZZ | Reposition Bilateral Testes, Open Approach                                              |
| 0 | 0VTTXZZ | Resection of Prepuce, External Approach                                                 |
| 0 | 0W3P8ZZ | Control Bleeding in Gastrointestinal Tract, Via Natural or Artificial Opening Endosc    |
| 0 | 0W9G3ZZ | Drainage of Peritoneal Cavity, Percutaneous Approach                                    |
| 0 | 0WJG0ZZ | Inspection of Peritoneal Cavity, Open Approach                                          |
| 0 | 0WP83YZ | Removal of Other Device from Chest Wall, Percutaneous Approach                          |
| 0 | 0WQF4ZZ | Repair Abdominal Wall, Percutaneous Endoscopic Approach                                 |
| 0 | 10E0XZZ | Delivery of Products of Conception, External Approach                                   |
| 0 | 2W3LX1Z | Immobilization of Right Lower Extremity using Splint                                    |
| 0 | 30233H1 | Transfusion of Nonautologous Whole Blood into Peripheral Vein, Percutaneous Ap          |
| 0 | 30233M1 | Transfusion of Nonautologous Plasma Cryoprecipitate into Peripheral Vein, Percu         |
| 0 | 30233X4 | Transfusion of Allogeneic Unspecified Cord Blood Stem Cells into Peripheral Vein,       |
| 0 | 30243M1 | Transfusion of Nonautologous Plasma Cryoprecipitate into Central Vein, Percutane        |
| 0 | 30243Y0 | Transfusion of Autologous Hematopoietic Stem Cells into Central Vein, Percutaneo        |
| 0 | 30243Y2 | Transfusion of Allogeneic Related Hematopoietic Stem Cells into Central Vein, Perc      |
| 0 | 3E03329 | Introduction of Other Anti-infective into Peripheral Vein, Percutaneous Approach        |
| 0 | 3E0337Z | Introduction of Electrolytic and Water Balance Substance into Peripheral Vein, Perc     |
| 0 | 3E033GC | Introduction of Other Therapeutic Substance into Peripheral Vein, Percutaneous Ap       |
| 0 | 3E033NZ | Introduction of Analgesics, Hypnotics, Sedatives into Peripheral Vein, Percutaneous     |
| 0 | 3E0430M | Introduction of Monoclonal Antibody into Central Vein, Percutaneous Approach            |
| 0 | 3E04317 | Introduction of Other Thrombolytic into Central Vein, Percutaneous Approach             |
| 0 | 3E0D3GC | Introduction of Other Therapeutic Substance into Mouth and Pharynx, Percutaneous        |
| 0 | 3E0F7GC | Introduction of Other Therapeutic Substance into Respiratory Tract, Via Natural or /    |
| 0 | 3E0F7SD | Introduction of Nitric Oxide Gas into Respiratory Tract, Via Natural or Artificial Oper |
| 0 | 3E0G36Z | Introduction of Nutritional Substance into Upper GI, Percutaneous Approach              |
| 0 | 3E0G7GC | Introduction of Other Therapeutic Substance into Upper GI, Via Natural or Artificial    |

|   |         |                                                                                      |
|---|---------|--------------------------------------------------------------------------------------|
| 0 | 3E0G8GC | Introduction of Other Therapeutic Substance into Upper GI, Via Natural or Artificial |
| 0 | 3E0T3TZ | Introduction of Destructive Agent into Peripheral Nerves and Plexi, Percutaneous A   |
| 0 | 3E1G78Z | Irrigation of Upper GI using Irrigating Substance, Via Natural or Artificial Opening |
| 0 | 4A01329 | Measurement of Peripheral Nervous Conductivity, Sensory, Percutaneous Approac        |
| 0 | 4A01X4Z | Measurement of Peripheral Nervous Electrical Activity, External Approach             |
| 0 | 4A0F33Z | Measurement of Musculoskeletal Contractility, Percutaneous Approach                  |
| 0 | 4A1134G | Monitoring of Peripheral Nervous Electrical Activity, Intraoperative, Percutaneous A |
| 0 | 5A09458 | Assistance with Respiratory Ventilation, 24-96 Consecutive Hours, Intermittent Pos   |
| 0 | 5A0945Z | Assistance with Respiratory Ventilation, 24-96 Consecutive Hours                     |
| 0 | 5A12012 | Performance of Cardiac Output, Single, Manual                                        |
| 0 | 5A1D90Z | Performance of Urinary Filtration, Continuous, Greater than 18 hours Per Day         |
| 0 | B040ZZZ | Ultrasonography of Brain                                                             |
| 0 | B3101ZZ | Fluoroscopy of Thoracic Aorta using Low Osmolar Contrast                             |
| 0 | B4141ZZ | Fluoroscopy of Superior Mesenteric Artery using Low Osmolar Contrast                 |
| 0 | B4151ZZ | Fluoroscopy of Inferior Mesenteric Artery using Low Osmolar Contrast                 |
| 0 | B44GZZZ | Ultrasonography of Left Lower Extremity Arteries                                     |
| 0 | B543ZZA | Ultrasonography of Right Jugular Veins, Guidance                                     |
| 0 | B549ZZA | Ultrasonography of Inferior Vena Cava, Guidance                                      |
| 0 | B54CZZA | Ultrasonography of Left Lower Extremity Veins, Guidance                              |
| 0 | B54CZZZ | Ultrasonography of Left Lower Extremity Veins                                        |
| 0 | BD15YZZ | Fluoroscopy of Upper GI using Other Contrast                                         |
| 0 | BD15ZZZ | Fluoroscopy of Upper GI                                                              |
| 0 | BF131ZZ | Fluoroscopy of Gallbladder and Bile Ducts using Low Osmolar Contrast                 |
| 0 | BN0HZZZ | Plain Radiography of Multiple Teeth                                                  |
| 0 | BQ13ZZZ | Fluoroscopy of Right Femur                                                           |
| 0 | BQ14ZZZ | Fluoroscopy of Left Femur                                                            |
| 0 | BQ1DZZZ | Fluoroscopy of Right Lower Leg                                                       |
| 0 | BR30ZZZ | Magnetic Resonance Imaging (MRI) of Cervical Spine                                   |
| 0 | BR37ZZZ | Magnetic Resonance Imaging (MRI) of Thoracic Spine                                   |
| 0 | BR39ZZZ | Magnetic Resonance Imaging (MRI) of Lumbar Spine                                     |
| 0 | BR3FZZZ | Magnetic Resonance Imaging (MRI) of Sacrum and Coccyx                                |
| 0 | BW24ZZZ | Computerized Tomography (CT Scan) of Chest and Abdomen                               |
| 0 | BW28ZZZ | Computerized Tomography (CT Scan) of Head                                            |
| 0 | BW33YZZ | Magnetic Resonance Imaging (MRI) of Chest using Other Contrast                       |
| 0 | BW38YZZ | Magnetic Resonance Imaging (MRI) of Head using Other Contrast                        |
| 0 | BW40ZZZ | Ultrasonography of Abdomen                                                           |
| 0 | F08Z3ZZ | Feeding/Eating Treatment                                                             |
| 0 | F13ZL7Z | Auditory Evoked Potentials Assessment using Electrophysiologic Equipment             |

|   |      |                                                                                         |
|---|------|-----------------------------------------------------------------------------------------|
| 9 | 0018 | Infusion of immunosuppressive antibody therapy                                          |
| 9 | 0094 | Intra-operative neurophysiologic monitoring                                             |
| 9 | 0234 | Ventricular shunt to abdominal cavity and organs                                        |
| 9 | 0852 | Blepharorrhaphy                                                                         |
| 9 | 1091 | Subconjunctival injection                                                               |
| 9 | 283  | Tonsillectomy with adenoidectomy                                                        |
| 9 | 3141 | Tracheoscopy through artificial stoma                                                   |
| 9 | 315  | Local excision or destruction of lesion or tissue of trachea                            |
| 9 | 3174 | Revision of tracheostomy                                                                |
| 9 | 3201 | Endoscopic excision or destruction of lesion or tissue of bronchus                      |
| 9 | 3321 | Bronchoscopy through artificial stoma                                                   |
| 9 | 3324 | Closed [endoscopic] biopsy of bronchus                                                  |
| 9 | 4100 | Bone marrow transplant, not otherwise specified                                         |
| 9 | 4224 | Closed [endoscopic] biopsy of esophagus                                                 |
| 9 | 4438 | Laparoscopic gastroenterostomy                                                          |
| 9 | 4462 | Closure of gastrostomy                                                                  |
| 9 | 4466 | Other procedures for creation of esophagogastric sphincteric competence                 |
| 9 | 4513 | Other endoscopy of small intestine                                                      |
| 9 | 5421 | Laparoscopy                                                                             |
| 9 | 5721 | Vesicostomy                                                                             |
| 9 | 5732 | Other cystoscopy                                                                        |
| 9 | 8105 | Dorsal and dorsolumbar fusion of the posterior column, posterior technique              |
| 9 | 8107 | Lumbar and lumbosacral fusion of the posterior column, posterior technique              |
| 9 | 8163 | Fusion or refusion of 4-8 vertebrae                                                     |
| 9 | 8164 | Fusion or refusion of 9 or more vertebrae                                               |
| 9 | 8321 | Open biopsy of soft tissue                                                              |
| 9 | 8604 | Other incision with drainage of skin and subcutaneous tissue                            |
| 9 | 8611 | Closed biopsy of skin and subcutaneous tissue                                           |
| 9 | 8624 | Chemosurgery of skin                                                                    |
| 9 | 863  | Other local excision or destruction of lesion or tissue of skin and subcutaneous tissue |
| 9 | 8712 | Other dental x-ray                                                                      |
| 9 | 8739 | Other soft tissue x-ray of chest wall                                                   |
| 9 | 8873 | Diagnostic ultrasound of other sites of thorax                                          |
| 9 | 8931 | Dental examination                                                                      |
| 9 | 8937 | Vital capacity determination                                                            |
| 9 | 8938 | Other nonoperative respiratory measurements                                             |
| 9 | 8939 | Other nonoperative measurements and examinations                                        |
| 9 | 8952 | Electrocardiogram                                                                       |



|   |      |                                                               |
|---|------|---------------------------------------------------------------|
| 9 | 9214 | Bone scan                                                     |
| 9 | 9308 | Electromyography                                              |
| 9 | 9353 | Application of other cast                                     |
| 9 | 9394 | Respiratory medication administered by nebulizer              |
| 9 | 9652 | Irrigation of ear                                             |
| 9 | 9654 | Dental scaling, polishing, and debridement                    |
| 9 | 9723 | Replacement of tracheostomy tube                              |
| 9 | 9923 | Injection of steroid                                          |
| 9 | 9952 | Prophylactic vaccination against influenza                    |
| 9 | 9955 | Prophylactic administration of vaccine against other diseases |
| 9 | 9957 | Administration of botulism antitoxin                          |

| Px Abbr Title (ICD)                                 | Px Code - Title (ICD)                                         |
|-----------------------------------------------------|---------------------------------------------------------------|
| Introduction nutr subst into upper GI, via NAO      | 3E0G76Z - Introduction nutr subst into upper GI, via NAO      |
| Drainage spinal canal, percutaneous, diagnostic     | 009U3ZX - Drainage spinal canal, percutaneous, diagnostic     |
| Insert infusion device into sup vena cava, perq     | 02HV33Z - Insert infusion device into sup vena cava, perq     |
| Insertion feeding device into stomach, perq endo    | 0DH64UZ - Insertion feeding device into stomach, perq endo    |
| Transfusion nonaut platelets central vein, perq     | 30243R1 - Transfusion nonaut platelets central vein, perq     |
| Introduction nutr subst into central vein, perq     | 3E0436Z - Introduction nutr subst into central vein, perq     |
| Insertion feeding device into stomach, perq         | 0DH63UZ - Insertion feeding device into stomach, perq         |
| Transfusion nonaut globulin central vein, perq      | 30243S1 - Transfusion nonaut globulin central vein, perq      |
| Transfusion nonautologous RBC central vein, perq    | 30243N1 - Transfusion nonautologous RBC central vein, perq    |
| Restriction EG junction, perq endo                  | 0DV44ZZ - Restriction EG junction, perq endo                  |
| Transfus allogeneic unrel CBSC in centr vein, perq  | 30243X3 - Transfus allogeneic unrel CBSC in centr vein, perq  |
| MRI brain                                           | B030ZZZ - MRI brain                                           |
| Insertion infusion device into rt atrium, perq      | 02H633Z - Insertion infusion device into rt atrium, perq      |
| Insert tunneled VAD into chest subq & fasc, open    | 0JH60XZ - Insert tunneled VAD into chest subq & fasc, open    |
| Intro oth antineoplastic into central vein, perq    | 3E04305 - Intro oth antineoplastic into central vein, perq    |
| Monitoring central nervous electr activity, ext     | 4A10X4Z - Monitoring central nervous electr activity, ext     |
| Spinal tap                                          | 0331 - Spinal tap                                             |
| Excision chest skin, external, diagnostic           | 0HB5XZX - Excision chest skin, external, diagnostic           |
| Insert endotracheal airway into trachea, via NAO    | 0BH17EZ - Insert endotracheal airway into trachea, via NAO    |
| Change feed device upper intest tract, external     | 0D20XUZ - Change feed device upper intest tract, external     |
| Respiratory ventilation, 24-96 hours                | 5A1945Z - Respiratory ventilation, 24-96 hours                |
| Assistance w resp ventilation <24 hours, CPAP       | 5A09357 - Assistance w resp ventilation <24 hours, CPAP       |
| Packed cell transfusion                             | 9904 - Packed cell transfusion                                |
| Removal infusion device great vessel, perq          | 02PY33Z - Removal infusion device great vessel, perq          |
| Respiratory ventilation, >96 hours                  | 5A1955Z - Respiratory ventilation, >96 hours                  |
| MRI brain using other contrast, unenh & enh         | B030Y0Z - MRI brain using other contrast, unenh & enh         |
| Venous catheter NEC                                 | 3893 - Venous catheter NEC                                    |
| Removal infusion device great vessel, external      | 02PYX3Z - Removal infusion device great vessel, external      |
| Insert endotrach airway into trachea, via NAOE      | 0BH18EZ - Insert endotrach airway into trachea, via NAOE      |
| Inspection larynx, via NAOE                         | 0CJS8ZZ - Inspection larynx, via NAOE                         |
| Insertion tunneled VAD chest subq & fascia, perq    | 0JH63XZ - Insertion tunneled VAD chest subq & fascia, perq    |
| Removal tunnel VAD trunk subq tiss & fasc, open     | 0JPT0XZ - Removal tunnel VAD trunk subq tiss & fasc, open     |
| Transfusion nonautologous RBC periph vein, perq     | 30233N1 - Transfusion nonautologous RBC periph vein, perq     |
| Transfusion nonaut frozen RBC central vein, perq    | 30243P1 - Transfusion nonaut frozen RBC central vein, perq    |
| Transfus allogeneic unrel HSC in central vein, perq | 30243Y3 - Transfus allogeneic unrel HSC in central vein, perq |
| Introduction nutr subst into lower GI, via NAO      | 3E0H76Z - Introduction nutr subst into lower GI, via NAO      |
| Assistance w resp ventilation 24-96 hours, CPAP     | 5A09457 - Assistance w resp ventilation 24-96 hours, CPAP     |

|                                                |                                                          |
|------------------------------------------------|----------------------------------------------------------|
| Laryngoscopy/tracheoscopy                      | 3142 - Laryngoscopy/tracheoscopy                         |
| Gastrostomy NEC                                | 4319 - Gastrostomy NEC                                   |
| Inc w rmvl FB/dev skin                         | 8605 - Inc w rmvl FB/dev skin                            |
| Non-invasive mech vent                         | 9390 - Non-invasive mech vent                            |
| Enteral nutrition                              | 966 - Enteral nutrition                                  |
| Cont invas MV-<96 hrs                          | 9671 - Cont invas MV-<96 hrs                             |
| Parenteral nutrition                           | 9915 - Parenteral nutrition                              |
| Inspection tracheobronchial tree, via NAOE     | 0BJ08ZZ - Inspection tracheobronchial tree, via NAOE     |
| Insertion feeding device into stomach, via NAO | 0DH67UZ - Insertion feeding device into stomach, via NAO |
| Transfusion nonaut platelets periph vein, perq | 30233R1 - Transfusion nonaut platelets periph vein, perq |
| Transfusion nonaut globulin periph vein, perq  | 30233S1 - Transfusion nonaut globulin periph vein, perq  |
| Transfus nonaut white cells central vein, perq | 30243Q1 - Transfus nonaut white cells central vein, perq |
| Introduction nutr subst into periph vein, perq | 3E0336Z - Introduction nutr subst into periph vein, perq |
| Monitoring arterial pressure, peripheral, perq | 4A133B1 - Monitoring arterial pressure, peripheral, perq |
| Respiratory ventilation, <24 hours             | 5A1935Z - Respiratory ventilation, <24 hours             |
| NIRS circulatory system, percutaneous          | 8E023DZ - NIRS circulatory system, percutaneous          |
| MRI spinal cord                                | B03BZZZ - MRI spinal cord                                |
| Live non-related donor                         | 0092 - Live non-related donor                            |
| Bronchoscopy NEC                               | 3323 - Bronchoscopy NEC                                  |
| Lapscop px EGS compet                          | 4467 - Lapscop px EGS compet                             |
| Brain & brain stem MRI                         | 8891 - Brain & brain stem MRI                            |
| Insert endotracheal tube                       | 9604 - Insert endotracheal tube                          |
| Cont invas MV->95 hrs                          | 9672 - Cont invas MV->95 hrs                             |
| Platelet transfusion                           | 9905 - Platelet transfusion                              |
| Insertion infusion device into IVC, perq       | 06H033Z - Insertion infusion device into IVC, perq       |
| Resection tonsils, external                    | 0CTPXZZ - Resection tonsils, external                    |
| Resection adenoids, external                   | 0CTQXZZ - Resection adenoids, external                   |
| Excision stomach, via NAOE, diagnostic         | 0DB68ZX - Excision stomach, via NAOE, diagnostic         |
| Excision stomach pylorus, via NAOE, diagnostic | 0DB78ZX - Excision stomach pylorus, via NAOE, diagnostic |
| Excision sigmoid colon, via NAOE, diagnostic   | 0DBN8ZX - Excision sigmoid colon, via NAOE, diagnostic   |
| Insertion feeding device into jejunum, via NAO | 0DHA7UZ - Insertion feeding device into jejunum, via NAO |
| Removal infusion device chest wall, open       | 0WP803Z - Removal infusion device chest wall, open       |
| Isolation                                      | 8E0ZXY6 - Isolation                                      |
| Tooth restor by filling                        | 232 - Tooth restor by filling                            |
| Crown application                              | 2341 - Crown application                                 |
| CVC placement w guide                          | 3897 - CVC placement w guide                             |
| Allo stem cell transpl                         | 4105 - Allo stem cell transpl                            |
| PEG                                            | 4311 - PEG                                               |

|                                                    |                                                              |
|----------------------------------------------------|--------------------------------------------------------------|
| Video/telemetric EEG MON                           | 8919 - Video/telemetric EEG MON                              |
| Oxygen enrichment NEC                              | 9396 - Oxygen enrichment NEC                                 |
| Repl gastrostomy tube                              | 9702 - Repl gastrostomy tube                                 |
| Inject/infuse immunoglob                           | 9914 - Inject/infuse immunoglob                              |
| Inject CA chemo agent                              | 9925 - Inject CA chemo agent                                 |
| Inject/infuse NEC                                  | 9929 - Inject/infuse NEC                                     |
| Inspection spinal canal, percutaneous              | 00JU3ZZ - Inspection spinal canal, percutaneous              |
| Insertion monitor device into upper artery, percut | 03HY32Z - Insertion monitor device into upper artery, perq   |
| Insert infus device into rt cephalic vein, perq    | 05HD33Z - Insert infus device into rt cephalic vein, perq    |
| Insertion infus device into rt internal JV, perq   | 05HM33Z - Insertion infus device into rt internal JV, perq   |
| Removal infusion device upper vein, external       | 05PY3XZ - Removal infusion device upper vein, external       |
| Bypass trachea to cutaneous w TRACH device         | 0B110F4 - Bypass trachea to cutaneous w TRACH device, open   |
| Change tracheostomy device trachea, external       | 0B21XFZ - Change tracheostomy device trachea, external       |
| Extraction multiple upper teeth, external          | 0CDWXZ1 - Extraction multiple upper teeth, external          |
| Replacement mult up teeth w syn sub, external      | 0CRWXJ1 - Replacement mult up teeth w syn sub, external      |
| Replacement mult lower teeth w syn sub, exte       | 0CRXXJ1 - Replacement mult lower teeth w syn sub, external   |
| Change feed device lower intest tract, external    | 0D2DXUZ - Change feed device lower intest tract, external    |
| Excision lower esophagus, via NAOE, diagnos        | 0DB38ZX - Excision lower esophagus, via NAOE, diagnostic     |
| Excision rectum, via NAOE, diagnostic              | 0DBP8ZX - Excision rectum, via NAOE, diagnostic              |
| Insertion feeding device into jejunum, perq        | 0DHA3UZ - Insertion feeding device into jejunum, perq        |
| Inspection upper intestinal tract, via NAOE        | 0DJ08ZZ - Inspection upper intestinal tract, via NAOE        |
| Excision liver, percutaneous, diagnostic           | 0FB03ZX - Excision liver, percutaneous, diagnostic           |
| Excision right upper leg skin, external, dxtic     | 0HBHXZX - Excision right upper leg skin, external, dxtic     |
| Repair abdomen skin, external                      | 0HQ7XZZ - Repair abdomen skin, external                      |
| Removal tunnel VAD trunk subq tiss & fasc, pe      | 0JPT3XZ - Removal tunnel VAD trunk subq tiss & fasc, perq    |
| Removal tunnel VAD trunk subq tiss & fasc, ex      | 0JPTXXZ - Removal tunnel VAD trunk subq tiss & fasc, ext     |
| Division right lower leg tendon, open              | 0L8N0ZZ - Division right lower leg tendon, open              |
| Transfer right lower leg tendon, open              | 0LXN0ZZ - Transfer right lower leg tendon, open              |
| Reposition lt fem shaft w intramed IF dev, open    | 0QS906Z - Reposition lt fem shaft w intramed IF dev, open    |
| Reposition right tibia w int fix device, open      | 0QSG04Z - Reposition right tibia w int fix device, open      |
| Repair bilateral inguinal region, open             | 0YQA0ZZ - Repair bilateral inguinal region, open             |
| Transfus nonaut frozen plasma central vein, pe     | 30243K1 - Transfus nonaut frozen plasma central vein, perq   |
| Transfusion nonaut CBSC into central vein, pe      | 30243X1 - Transfusion nonaut CBSC into central vein, perq    |
| Transfus allogeneic CBSC NOS into centr vein, p    | 30243X4 - Transfus allogeneic CBSC NOS into centr vein, perq |
| Introduction other ther substance muscle, perq     | 3E023GC - Introduction other ther substance muscle, perq     |
| Intro oth antineoplastic into periph vein, perq    | 3E03305 - Intro oth antineoplastic into periph vein, perq    |
| Intro oth ther substance into central vein, perq   | 3E043GC - Intro oth ther substance into central vein, perq   |
| Intro immunosuppressive into central vein, per     | 3E043WL - Intro immunosuppressive into central vein, perq    |

|                                                  |                                                            |
|--------------------------------------------------|------------------------------------------------------------|
| Intro oth ther subst into mouth & pharynx, ext   | 3E0DXGC - Intro oth ther subst into mouth & pharynx, ext   |
| Meas central nervous electrical activity, ext    | 4A00X4Z - Meas central nervous electrical activity, ext    |
| Monitoring arterial pulse, peripheral, perq      | 4A133J1 - Monitoring arterial pulse, peripheral, perq      |
| Monitoring sleep, external                       | 4A1ZXQZ - Monitoring sleep, external                       |
| Assistance w resp ventilation >96 hours, CPAP    | 5A09557 - Assistance w resp ventilation >96 hours, CPAP    |
| MRI brain using other contrast                   | B030YZZ - MRI brain using other contrast                   |
| Ultrasonography right & left heart               | B246ZZZ - Ultrasonography right & left heart               |
| Fluoro sup vena cava using low osm contr, gui    | B5181ZA - Fluoro sup vena cava using low osm contr, guide  |
| Ultrasonography superior vena cava, guidance     | B548ZZA - Ultrasonography superior vena cava, guidance     |
| Fluoroscopy upper GI & sm bowel using oth cc     | BD16YZZ - Fluoroscopy upper GI & sm bowel using oth contr  |
| Instr sw/oral func assess using swallow equip    | F00ZJWZ - Instr sw/oral func assess using swallow equip    |
| Destr periph/cran nerves                         | 042 - Destr periph/cran nerves                             |
| Deciduous tooth extract                          | 2301 - Deciduous tooth extract                             |
| Tooth extraction NEC                             | 2309 - Tooth extraction NEC                                |
| Dental restoration NEC                           | 2349 - Dental restoration NEC                              |
| Other laryngeal repair                           | 3169 - Other laryngeal repair                              |
| Arterial catheterization                         | 3891 - Arterial catheterization                            |
| Cord stem cell transpl                           | 4106 - Cord stem cell transpl                              |
| EGD w closed biopsy                              | 4516 - EGD w closed biopsy                                 |
| Adductor tenotomy of hip                         | 8312 - Adductor tenotomy of hip                            |
| Polysomnogram                                    | 8917 - Polysomnogram                                       |
| Physical therapy NEC                             | 9339 - Physical therapy NEC                                |
| Occupational therapy                             | 9383 - Occupational therapy                                |
| Repl small intest tube                           | 9703 - Repl small intest tube                              |
| Byp cereb vent to perit cavity w syn sub, perq   | 00163J6 - Byp cereb vent to perit cavity w syn sub, perq   |
| Drainage cerebral ventricle w drain device, open | 009600Z - Drainage cerebral ventricle w drain device, open |
| Drainage spinal canal, percutaneous              | 009U3ZZ - Drainage spinal canal, percutaneous              |
| Insertion infusion device into left atrium, perq | 02H733Z - Insertion infusion device into left atrium, perq |
| Insertion pacemaker lead into pericardium, open  | 02HN0JZ - Insertion pacemaker lead into pericardium, open  |
| Removal infusion device heart, percutaneous      | 02PA33Z - Removal infusion device heart, percutaneous      |
| Removal infusion device heart, external          | 02PAX3Z - Removal infusion device heart, external          |
| Insertion infus device into celiac artery, perq  | 04H133Z - Insertion infus device into celiac artery, perq  |
| Insert infus device into sup mesent artery, perq | 04H533Z - Insert infus device into sup mesent artery, perq |
| Insert infus dev into infer mesent artery, perq  | 04HB33Z - Insert infus dev into infer mesent artery, perq  |
| Insertion monitor device into lower artery, perq | 04HY32Z - Insertion monitor device into lower artery, perq |
| Insert infus device into rt subclav vein, perq   | 05H533Z - Insert infus device into rt subclav vein, perq   |
| Insert infus device into lt subclav vein, perq   | 05H633Z - Insert infus device into lt subclav vein, perq   |
| Insert infus device into left basilic vein, perq | 05HC33Z - Insert infus device into left basilic vein, perq |

|                                                  |                                                            |
|--------------------------------------------------|------------------------------------------------------------|
| Insertion infus device into rt hand vein, perq   | 05HG33Z - Insertion infus device into rt hand vein, perq   |
| Removal infusion device upper vein, percutane    | 05PY33Z - Removal infusion device upper vein, percutaneous |
| Insert infus device into left femoral vein, perq | 06HN33Z - Insert infus device into left femoral vein, perq |
| Occlusion esoph vein w Xlum device, via NAO      | 06L38CZ - Occlusion esoph vein w Xlum device, via NAOE     |
| Removal infusion device lower vein, external     | 06PYX3Z - Removal infusion device lower vein, external     |
| Drainage right middle ear w drain device, oper   | 099500Z - Drainage right middle ear w drain device, open   |
| Drainage left middle ear w drain device, open    | 099600Z - Drainage left middle ear w drain device, open    |
| Inspection right tympanic membrane, perq         | 09J73ZZ - Inspection right tympanic membrane, perq         |
| Inspection left tympanic membrane, perq          | 09J83ZZ - Inspection left tympanic membrane, perq          |
| Removal drain device lt tymp membrane, via N     | 09P870Z - Removal drain device lt tymp membrane, via NAO   |
| Drainage rt upper lobe bronchus, via NAOE, d     | 0B948ZX - Drainage rt upper lobe bronchus, via NAOE, dxtic |
| Drainage rt low lobe bronchus, via NAOE, dxti    | 0B968ZX - Drainage rt low lobe bronchus, via NAOE, dxtic   |
| Drainage lt lower lobe bronchus, via NAOE, dx    | 0B9B8ZX - Drainage lt lower lobe bronchus, via NAOE, dxtic |
| Drainage right middle lung lobe, via NAOE, dx    | 0B9D8ZX - Drainage right middle lung lobe, via NAOE, dxtic |
| Drainage right lower lung lobe, via NAOE, dxti   | 0B9F8ZX - Drainage right lower lung lobe, via NAOE, dxtic  |
| Drainage left upper lung lobe, via NAOE, dxtic   | 0B9G8ZX - Drainage left upper lung lobe, via NAOE, dxtic   |
| Removal intraluminal device trachea, external    | 0BP1XDZ - Removal intraluminal device trachea, external    |
| Extirpation matter mult upper teeth, external    | 0CCWXZ1 - Extirpation matter mult upper teeth, external    |
| Extirpation matter mult lower teeth, external    | 0CCXXZ1 - Extirpation matter mult lower teeth, external    |
| Extraction single lower tooth, external          | 0CDXXZ0 - Extraction single lower tooth, external          |
| Extraction multiple lower teeth, external        | 0CDXXZ1 - Extraction multiple lower teeth, external        |
| Repair single lower tooth, external              | 0CQXXZ0 - Repair single lower tooth, external              |
| Replacement single upper tooth w syn sub, op     | 0CRW0J0 - Replacement single upper tooth w syn sub, open   |
| Replacement single up tooth w syn sub, exterr    | 0CRWXJ0 - Replacement single up tooth w syn sub, external  |
| Bypass stomach to cutaneous, perq endo           | 0D164Z4 - Bypass stomach to cutaneous, perq endo           |
| Bypass stomach to jejunum, via NAOE              | 0D168ZA - Bypass stomach to jejunum, via NAOE              |
| Destruction esophagus, via NAOE                  | 0D558ZZ - Destruction esophagus, via NAOE                  |
| Drainage stomach w drainage device, via NAO      | 0D9670Z - Drainage stomach w drainage device, via NAO      |
| Excision middle esophagus, via NAOE, diagnos     | 0DB28ZX - Excision middle esophagus, via NAOE, diagnostic  |
| Excision duodenum, via NAOE, diagnostic          | 0DB98ZX - Excision duodenum, via NAOE, diagnostic          |
| Excision ileum, via NAOE, diagnostic             | 0DBB8ZX - Excision ileum, via NAOE, diagnostic             |
| Excision cecum, via NAOE, diagnostic             | 0DBH8ZX - Excision cecum, via NAOE, diagnostic             |
| Excision ascending colon, via NAOE, diagnosti    | 0DBK8ZX - Excision ascending colon, via NAOE, diagnostic   |
| Excision transverse colon, via NAOE, diagnosti   | 0DBL8ZX - Excision transverse colon, via NAOE, diagnostic  |
| Excision descending colon, via NAOE, diagnosti   | 0DBM8ZX - Excision descending colon, via NAOE, diagnostic  |
| Insertion feeding device into stomach, open      | 0DH60UZ - Insertion feeding device into stomach, open      |
| Insertion infusion device into stomach, via NAO  | 0DH673Z - Insertion infusion device into stomach, via NAO  |
| Inspection upper intestinal tract, via NAO       | 0DJ07ZZ - Inspection upper intestinal tract, via NAO       |

|                                                  |                                                            |
|--------------------------------------------------|------------------------------------------------------------|
| Removal feeding device stomach, external         | 0DP6XUZ - Removal feeding device stomach, external         |
| Repair descending colon, open                    | 0DQM0ZZ - Repair descending colon, open                    |
| Repair rectum, open                              | 0DQP0ZZ - Repair rectum, open                              |
| Revision feed device up intest tract, via NAOE   | 0DW08UZ - Revision feed device up intest tract, via NAOE   |
| Bypass common bile duct to sm intestine, open    | 0F190ZB - Bypass common bile duct to sm intestine, open    |
| Excision liver, open, diagnostic                 | 0FB00ZX - Excision liver, open, diagnostic                 |
| Excision scalp skin, external                    | 0HB0XZZ - Excision scalp skin, external                    |
| Excision neck skin, external, diagnostic         | 0HB4XZX - Excision neck skin, external, diagnostic         |
| Excision back skin, external, diagnostic         | 0HB6XZX - Excision back skin, external, diagnostic         |
| Excision abdomen skin, external, diagnostic      | 0HB7XZX - Excision abdomen skin, external, diagnostic      |
| Excision inguinal skin, external, diagnostic     | 0HBAXZX - Excision inguinal skin, external, diagnostic     |
| Repair perineum skin, external                   | 0HQ9XZZ - Repair perineum skin, external                   |
| Change oth device trunk subq & fascia, external  | 0J2TXYZ - Change oth device trunk subq & fascia, external  |
| Destruction right neck subq & fascia, open       | 0J540ZZ - Destruction right neck subq & fascia, open       |
| Division right foot subq tissue & fascia, open   | 0J8Q0ZZ - Division right foot subq tissue & fascia, open   |
| Division left foot subq tiss & fascia, open      | 0J8R0ZZ - Division left foot subq tiss & fascia, open      |
| Excision abdomen subq tiss & fascia, open, dx    | 0JB80ZX - Excision abdomen subq tiss & fascia, open, dxtic |
| Insert sngl chamb pace in chest subq/fasc, open  | 0JH604Z - Insert sngl chamb pace in chest subq/fasc, open  |
| Insert tunnel VAD into rt Uleg subq & fasc, perq | 0JHL3XZ - Insert tunnel VAD into rt Uleg subq & fasc, perq |
| Insert tunnel VAD into lt Uleg subq & fasc, perq | 0JHM3XZ - Insert tunnel VAD into lt Uleg subq & fasc, perq |
| Release left foot subq tissue & fascia, open     | 0JNR0ZZ - Release left foot subq tissue & fascia, open     |
| Removal TIVAD trunk subq tiss & fascia, perq     | 0JPT3WZ - Removal TIVAD trunk subq tiss & fascia, perq     |
| Repair abdomen subq tissue & fascia, open        | 0JQ80ZZ - Repair abdomen subq tissue & fascia, open        |
| Transfer right lower leg muscle, open            | 0KXS0ZZ - Transfer right lower leg muscle, open            |
| Division left lower leg tendon, open             | 0L8P0ZZ - Division left lower leg tendon, open             |
| Division left ankle tendon, open                 | 0L8T0ZZ - Division left ankle tendon, open                 |
| Release right foot tendon, open                  | 0LNV0ZZ - Release right foot tendon, open                  |
| Transfer left lower leg tendon, open             | 0LXP0ZZ - Transfer left lower leg tendon, open             |
| Transfer left ankle tendon, open                 | 0LXT0ZZ - Transfer left ankle tendon, open                 |
| Excision left tarsal, open                       | 0QBM0ZZ - Excision left tarsal, open                       |
| Insertion ext fix device into rt fem shaft, perq | 0QH835Z - Insertion ext fix device into rt fem shaft, perq |
| Insertion ext fix device into lt fem shaft, perq | 0QH935Z - Insertion ext fix device into lt fem shaft, perq |
| Removal int fix device right toe phalanx, open   | 0QPQ04Z - Removal int fix device right toe phalanx, open   |
| Removal int fix device left toe phalanx, open    | 0QPR04Z - Removal int fix device left toe phalanx, open    |
| Reposition rt fem shaft w intramed IF dev, open  | 0QS806Z - Reposition rt fem shaft w intramed IF dev, open  |
| Reposition right fibula w int fix device, open   | 0QSJ04Z - Reposition right fibula w int fix device, open   |
| Reposition right tarsal, open                    | 0QSL0ZZ - Reposition right tarsal, open                    |
| Fusion 8/+ thor vert joints w ATS, post-PC, open | 0RG8071 - Fusion 8/+ thor vert joints w ATS, post-PC, open |

|                                                     |                                                               |
|-----------------------------------------------------|---------------------------------------------------------------|
| Fusion thorlumb vert joint w ATS, post-PC, open     | 0RGA071 - Fusion thorlumb vert joint w ATS, post-PC, open     |
| Fus 2/+ lumb vert jt w inbdy dev, post-PC, open     | 0SG10A1 - Fus 2/+ lumb vert jt w inbdy dev, post-PC, open     |
| Fusion lumbosacral joint w ATS, post-PC, open       | 0SG3071 - Fusion lumbosacral joint w ATS, post-PC, open       |
| Fusion rt sacroiliac jt w int fix device, open      | 0SG704Z - Fusion rt sacroiliac jt w int fix device, open      |
| Fusion lt sacroiliac jt w int fix device, open      | 0SG804Z - Fusion lt sacroiliac jt w int fix device, open      |
| Fusion right toe phalangeal joint, open             | 0SGP0ZZ - Fusion right toe phalangeal joint, open             |
| Fusion lt toe phal joint w int fix device, open     | 0SGQ04Z - Fusion lt toe phal joint w int fix device, open     |
| Release left ankle joint, open                      | 0SNG0ZZ - Release left ankle joint, open                      |
| Bypass bladder to cutaneous, open                   | 0T1B0ZD - Bypass bladder to cutaneous, open                   |
| Inspection bladder, via nat/artif opening endo      | 0TJB8ZZ - Inspection bladder, via nat/artif opening endo      |
| Resection right ovary, perq endo                    | 0UT04ZZ - Resection right ovary, perq endo                    |
| Excision bilateral epididymis, open                 | 0VBL0ZZ - Excision bilateral epididymis, open                 |
| Reposition bilateral testes, open                   | 0VSC0ZZ - Reposition bilateral testes, open                   |
| Resection prepuce, external                         | 0VTTXZZ - Resection prepuce, external                         |
| Control bleeding GI tract, via NAOE                 | 0W3P8ZZ - Control bleeding GI tract, via NAOE                 |
| Drainage peritoneal cavity, percutaneous            | 0W9G3ZZ - Drainage peritoneal cavity, percutaneous            |
| Inspection peritoneal cavity, open                  | 0WJG0ZZ - Inspection peritoneal cavity, open                  |
| Removal other device chest wall, percutaneous       | 0WP83YZ - Removal other device chest wall, percutaneous       |
| Repair abdominal wall, percutaneous endoscopic      | 0WQF4ZZ - Repair abdominal wall, percutaneous endoscopic      |
| Delivery products of conception, external           | 10E0XZZ - Delivery products of conception, external           |
| Immobilization rt lower extremity using splint      | 2W3LX1Z - Immobilization rt lower extremity using splint      |
| Transfusion nonaut whole blood periph vein, perq    | 30233H1 - Transfusion nonaut whole blood periph vein, perq    |
| Transfusion nonaut plasma cryo periph vein, perq    | 30233M1 - Transfusion nonaut plasma cryo periph vein, perq    |
| Transfus allogeneic CBSC NOS into periph vein, perq | 30233X4 - Transfus allogeneic CBSC NOS into periph vein, perq |
| Transfus nonaut plasma cryo central vein, perq      | 30243M1 - Transfus nonaut plasma cryo central vein, perq      |
| Transfusion autolog HSC into central vein, perq     | 30243Y0 - Transfusion autolog HSC into central vein, perq     |
| Transfus allogeneic rel HSC into central vein, perq | 30243Y2 - Transfus allogeneic rel HSC into central vein, perq |
| Intro oth anti-infective into periph vein, perq     | 3E03329 - Intro oth anti-infective into periph vein, perq     |
| Intro elec/water balance subst periph vein, perq    | 3E0337Z - Intro elec/water balance subst periph vein, perq    |
| Intro oth ther substance into periph vein, perq     | 3E033GC - Intro oth ther substance into periph vein, perq     |
| Intro analg, hypnot, sedat peripheral vein, perq    | 3E033NZ - Intro analg, hypnot, sedat peripheral vein, perq    |
| Intro monoclon antibody into central vein, perq     | 3E0430M - Intro monoclon antibody into central vein, perq     |
| Intro other thrombolytic into central vein, perq    | 3E04317 - Intro other thrombolytic into central vein, perq    |
| Intro oth ther subst into mouth & pharynx, perq     | 3E0D3GC - Intro oth ther subst into mouth & pharynx, perq     |
| Intro oth ther subst into resp tract, via NAO       | 3E0F7GC - Intro oth ther subst into resp tract, via NAO       |
| Intro nitric oxide gas into resp tract, via NAO     | 3E0F7SD - Intro nitric oxide gas into resp tract, via NAO     |
| Introduction nutr substance into upper GI, perq     | 3E0G36Z - Introduction nutr substance into upper GI, perq     |
| Intro oth ther substance into upper GI, via NAO     | 3E0G7GC - Intro oth ther substance into upper GI, via NAO     |



|                                                 |                                                            |
|-------------------------------------------------|------------------------------------------------------------|
| Intro oth ther substance into upper GI, via NAC | 3E0G8GC - Intro oth ther substance into upper GI, via NAOE |
| Introduction destr agent into PN & plexi, perq  | 3E0T3TZ - Introduction destr agent into PN & plexi, perq   |
| Irrigation upper GI using irrig subst, via NAO  | 3E1G78Z - Irrigation upper GI using irrig subst, via NAO   |
| Meas periph nervous conductivity, sensory, pe   | 4A01329 - Meas periph nervous conductivity, sensory, perq  |
| Meas periph nervous electrical activity, ext    | 4A01X4Z - Meas periph nervous electrical activity, ext     |
| Measurement musculoskeletal contractility, pe   | 4A0F33Z - Measurement musculoskeletal contractility, perq  |
| Mon periph nerv electr activity, intraop, perq  | 4A1134G - Mon periph nerv electr activity, intraop, perq   |
| Assistance w resp ventilation 24-96 hours, IPA  | 5A09458 - Assistance w resp ventilation 24-96 hours, IPAP  |
| Assistance w respiratory ventilation 24-96 hou  | 5A0945Z - Assistance w respiratory ventilation 24-96 hours |
| Performance cardiac output, single, manual      | 5A12012 - Performance cardiac output, single, manual       |
| Performance urinary filtration, continuous      | 5A1D90Z - Performance urinary filtration, continuous       |
| Ultrasonography brain                           | B040ZZZ - Ultrasonography brain                            |
| Fluoroscopy thor aorta using low osm contrast   | B3101ZZ - Fluoroscopy thor aorta using low osm contrast    |
| Fluoroscopy sup mesent artery using lo osm c    | B4141ZZ - Fluoroscopy sup mesent artery using lo osm contr |
| Fluoroscopy infer mesent art using lo osm con   | B4151ZZ - Fluoroscopy infer mesent art using lo osm contr  |
| Ultrasonography left lower extremity arteries   | B44GZZZ - Ultrasonography left lower extremity arteries    |
| Ultrasonography right jugular veins, guidance   | B543ZZA - Ultrasonography right jugular veins, guidance    |
| Ultrasonography inferior vena cava, guidance    | B549ZZA - Ultrasonography inferior vena cava, guidance     |
| Ultrasonography lt low extrem veins, guidance   | B54CZZA - Ultrasonography lt low extrem veins, guidance    |
| Ultrasonography left lower extremity veins      | B54CZZZ - Ultrasonography left lower extremity veins       |
| Fluoroscopy upper GI using other contrast       | BD15YZZ - Fluoroscopy upper GI using other contrast        |
| Fluoroscopy upper GI                            | BD15ZZZ - Fluoroscopy upper GI                             |
| Fluoroscopy GB & bile ducts using low osm co    | BF131ZZ - Fluoroscopy GB & bile ducts using low osm contr  |
| Plain Xray multiple teeth                       | BN0HZZZ - Plain Xray multiple teeth                        |
| Fluoroscopy right femur                         | BQ13ZZZ - Fluoroscopy right femur                          |
| Fluoroscopy left femur                          | BQ14ZZZ - Fluoroscopy left femur                           |
| Fluoroscopy right lower leg                     | BQ1DZZZ - Fluoroscopy right lower leg                      |
| MRI cervical spine                              | BR30ZZZ - MRI cervical spine                               |
| MRI thoracic spine                              | BR37ZZZ - MRI thoracic spine                               |
| MRI lumbar spine                                | BR39ZZZ - MRI lumbar spine                                 |
| MRI sacrum & coccyx                             | BR3FZZZ - MRI sacrum & coccyx                              |
| CT scan chest & abdomen                         | BW24ZZZ - CT scan chest & abdomen                          |
| CT scan head                                    | BW28ZZZ - CT scan head                                     |
| MRI chest using other contrast                  | BW33YZZ - MRI chest using other contrast                   |
| MRI head using other contrast                   | BW38YZZ - MRI head using other contrast                    |
| Ultrasonography abdomen                         | BW40ZZZ - Ultrasonography abdomen                          |
| Feeding/eating treatment                        | F08Z3ZZ - Feeding/eating treatment                         |
| AEP assesment using electrophys equipment       | F13ZL7Z - AEP assesment using electrophys equipment        |

|                          |                                 |
|--------------------------|---------------------------------|
| Infus immsupp antiB Tx   | 0018 - Infus immsupp antiB Tx   |
| Intraop neurophys MON    | 0094 - Intraop neurophys MON    |
| Vent shunt to abd cavity | 0234 - Vent shunt to abd cavity |
| Blepharorrhaphy          | 0852 - Blepharorrhaphy          |
| Subconjunctival inject   | 1091 - Subconjunctival inject   |
| T&A                      | 283 - T&A                       |
| Tracheoscopy thru stoma  | 3141 - Tracheoscopy thru stoma  |
| Loc exc/destr larynx les | 315 - Loc exc/destr larynx les  |
| Revision of tracheostomy | 3174 - Revision of tracheostomy |
| Endo destr bronch les    | 3201 - Endo destr bronch les    |
| Bronchoscopy thru stoma  | 3321 - Bronchoscopy thru stoma  |
| Closed bronchus biopsy   | 3324 - Closed bronchus biopsy   |
| Bone marrow transpl NOS  | 4100 - Bone marrow transpl NOS  |
| Closed esophageal biopsy | 4224 - Closed esophageal biopsy |
| Lapscp gastroenterostomy | 4438 - Lapscp gastroenterostomy |
| Gastrostomy closure      | 4462 - Gastrostomy closure      |
| Creat EG sphinct compet  | 4466 - Creat EG sphinct compet  |
| Sm intest endoscopy NEC  | 4513 - Sm intest endoscopy NEC  |
| Laparoscopy              | 5421 - Laparoscopy              |
| Vesicostomy              | 5721 - Vesicostomy              |
| Cystoscopy NEC           | 5732 - Cystoscopy NEC           |
| Post dors FUS post col   | 8105 - Post dors FUS post col   |
| Post lumb FUS post col   | 8107 - Post lumb FUS post col   |
| Fusion/refusion 4-8 vert | 8163 - Fusion/refusion 4-8 vert |
| Fusion/refusion >8 vert  | 8164 - Fusion/refusion >8 vert  |
| Soft tissue open biopsy  | 8321 - Soft tissue open biopsy  |
| Skin & subcu I&D NEC     | 8604 - Skin & subcu I&D NEC     |
| Skin & subcu closed Bx   | 8611 - Skin & subcu closed Bx   |
| Skin chemosurgery        | 8624 - Skin chemosurgery        |
| Loc exc/destr skin NEC   | 863 - Loc exc/destr skin NEC    |
| Dental x-ray NEC         | 8712 - Dental x-ray NEC         |
| Thor soft tiss x-ray NEC | 8739 - Thor soft tiss x-ray NEC |
| Thorax ultrasound NEC    | 8873 - Thorax ultrasound NEC    |
| Dental examination       | 8931 - Dental examination       |
| Vital capacity           | 8937 - Vital capacity           |
| Respiratory measure NEC  | 8938 - Respiratory measure NEC  |
| Nonoperative exams NEC   | 8939 - Nonoperative exams NEC   |
| Electrocardiogram        | 8952 - Electrocardiogram        |

|                          |                                 |
|--------------------------|---------------------------------|
| Bone scan                | 9214 - Bone scan                |
| Electromyography         | 9308 - Electromyography         |
| Cast application NEC     | 9353 - Cast application NEC     |
| Nebulizer therapy        | 9394 - Nebulizer therapy        |
| Irrigation of ear        | 9652 - Irrigation of ear        |
| Dental scaling & debride | 9654 - Dental scaling & debride |
| Repl TRACH tube          | 9723 - Repl TRACH tube          |
| Inject steroid           | 9923 - Inject steroid           |
| Influenza vaccination    | 9952 - Influenza vaccination    |
| Vaccination NEC          | 9955 - Vaccination NEC          |
| Botulism antitoxin admin | 9957 - Botulism antitoxin admin |

| N Visits | N Patients |
|----------|------------|
| 64       | 29         |
| 28       | 26         |
| 23       | 22         |
| 17       | 17         |
| 20       | 17         |
| 21       | 17         |
| 16       | 16         |
| 23       | 16         |
| 18       | 14         |
| 13       | 13         |
| 12       | 12         |
| 13       | 12         |
| 13       | 11         |
| 13       | 11         |
| 13       | 11         |
| 10       | 10         |
| 12       | 10         |
| 9        | 9          |
| 10       | 8          |
| 9        | 8          |
| 16       | 8          |
| 9        | 7          |
| 10       | 7          |
| 6        | 6          |
| 17       | 6          |
| 6        | 6          |
| 7        | 6          |
| 5        | 5          |
| 5        | 5          |
| 5        | 5          |
| 6        | 5          |
| 6        | 5          |
| 6        | 5          |
| 5        | 5          |
| 5        | 5          |
| 9        | 5          |
| 5        | 5          |

|    |   |
|----|---|
| 9  | 5 |
| 5  | 5 |
| 9  | 5 |
| 16 | 5 |
| 11 | 5 |
| 7  | 5 |
| 6  | 5 |
| 5  | 4 |
| 4  | 4 |
| 4  | 4 |
| 4  | 4 |
| 5  | 4 |
| 4  | 4 |
| 4  | 4 |
| 5  | 4 |
| 4  | 4 |
| 4  | 4 |
| 4  | 4 |
| 4  | 4 |
| 4  | 4 |
| 4  | 4 |
| 4  | 4 |
| 4  | 4 |
| 4  | 4 |
| 4  | 4 |
| 6  | 4 |
| 4  | 4 |
| 4  | 4 |
| 5  | 4 |
| 3  | 3 |
| 3  | 3 |
| 3  | 3 |
| 5  | 3 |
| 4  | 3 |
| 5  | 3 |
| 3  | 3 |
| 3  | 3 |
| 6  | 3 |
| 3  | 3 |
| 4  | 3 |
| 4  | 3 |
| 3  | 3 |
| 3  | 3 |



|   |   |
|---|---|
| 2 | 2 |
| 2 | 2 |
| 2 | 2 |
| 2 | 2 |
| 2 | 2 |
| 2 | 2 |
| 2 | 2 |
| 3 | 2 |
| 2 | 2 |
| 2 | 2 |
| 2 | 2 |
| 2 | 2 |
| 2 | 2 |
| 2 | 2 |
| 2 | 2 |
| 2 | 2 |
| 3 | 2 |
| 2 | 2 |
| 2 | 2 |
| 2 | 2 |
| 2 | 2 |
| 2 | 2 |
| 2 | 2 |
| 2 | 2 |
| 2 | 2 |
| 2 | 2 |
| 2 | 2 |
| 4 | 2 |
| 5 | 2 |
| 5 | 2 |
| 3 | 2 |
| 1 | 1 |
| 1 | 1 |
| 1 | 1 |
| 1 | 1 |
| 1 | 1 |
| 1 | 1 |
| 1 | 1 |
| 1 | 1 |
| 1 | 1 |
| 1 | 1 |
| 1 | 1 |
| 1 | 1 |
| 1 | 1 |
| 1 | 1 |
| 1 | 1 |
| 1 | 1 |
| 2 | 1 |
| 1 | 1 |













|   |   |
|---|---|
| 1 | 1 |
| 2 | 1 |
| 1 | 1 |
| 1 | 1 |
| 3 | 1 |
| 1 | 1 |
| 5 | 1 |
| 1 | 1 |
| 1 | 1 |
| 1 | 1 |
| 1 | 1 |

| CPT Code | CPT Title                                        | N Visits | N Patients |
|----------|--------------------------------------------------|----------|------------|
| 36589    | RMVL TUN CVC W/O SUBQ PORT/PMP                   | 13       | 13         |
| 99283    | EMERGENCY DEPARTMENT VISIT MODERATE SEVERITY     | 19       | 11         |
| 99284    | EMERGENCY DEPARTMENT VISIT HIGH/URGENT SEVERITY  | 15       | 10         |
| 99285    | EMERGENCY DEPT VISIT HIGH SEVERITY&THREAT FUNCJ  | 15       | 9          |
| 62270    | SPINAL PUNCTURE LUMBAR DIAGNOSTIC                | 8        | 8          |
| 43653    | LAPS SURG GASTROSTOMY W/O CONSTJ GSTR TUBE SPX   | 6        | 6          |
| 80053    | COMPREHENSIVE METABOLIC PANEL                    | 9        | 6          |
| 85025    | BLOOD COUNT COMPLETE AUTO&AUTO DIFRNTL WBC       | 7        | 6          |
| 31622    | #MULTIVALUE                                      | 5        | 5          |
| 41899    | #MULTIVALUE                                      | 6        | 5          |
| 43760    | #MULTIVALUE                                      | 7        | 5          |
| 43762    | PERQ REPLACEMENT GTUBE NOT REQ REVJ GSTRST TRC   | 5        | 5          |
| 70553    | MRI BRAIN BRAIN STEM W/O W/CONTRAST MATERIAL     | 5        | 5          |
| 27685    | LNGTH/SHRT TENDON LEG/ANKLE 1 TENDON SPX         | 5        | 4          |
| 36415    | COLLECTION VENOUS BLOOD VENIPUNCTURE             | 6        | 4          |
| 36590    | RMVL TUN CTR VAD W/SUBQ PORT/PMP CTR/PRPH INSJ   | 4        | 4          |
| 64611    | CHEMODENERV PAROTID&SUBMANDIBL SALIVARY GLNDS    | 6        | 4          |
| 83605    | ASSAY OF LACTATE                                 | 4        | 4          |
| 84132    | POTASSIUM SERUM PLASMA/WHOLE BLOOD               | 4        | 4          |
| 84295    | SODIUM SERUM PLASMA OR WHOLE BLOOD               | 4        | 4          |
| 92610    | EVAL ORAL&PHARYNGEAL SWLNG FUNCJ                 | 4        | 4          |
| 96361    | IV INFUSION HYDRATION EACH ADDITIONAL HOUR       | 4        | 4          |
| 96365    | IV INFUSION THERAPY/PROPHYLAXIS /DX 1ST TO 1 HR  | 4        | 4          |
| 42820    | TONSILLECTOMY & ADENOIDECTOMY <AGE 12            | 3        | 3          |
| 43239    | EGD TRANSORAL BIOPSY SINGLE/MULTIPLE             | 3        | 3          |
| 43246    | #MULTIVALUE                                      | 3        | 3          |
| 80048    | BASIC METABOLIC PANEL CALCIUM TOTAL              | 3        | 3          |
| 82330    | CALCIUM IONIZED                                  | 3        | 3          |
| 82374    | CARBON DIOXIDE BICARBONATE                       | 3        | 3          |
| 82435    | CHLORIDE BLD                                     | 3        | 3          |
| 82565    | CREATININE BLOOD                                 | 3        | 3          |
| 82657    | NZYM ACTIV BLD CELLS/TISS NONRADACT SUBSTRATE EA | 3        | 3          |
| 82803    | BLOOD GASES ANY COMBINATION PH PCO2 PO2 CO2 HCO3 | 3        | 3          |
| 82947    | GLUCOSE QUANTITATIVE BLOOD XCPT REAGENT STRIP    | 3        | 3          |
| 83735    | ASSAY OF MAGNESIUM                               | 3        | 3          |
| 84100    | ASSAY OF PHOSPHORUS INORGANIC                    | 3        | 3          |
| 84520    | ASSAY OF UREA NITROGEN QUANTITATIVE              | 3        | 3          |

|       |                                                  |   |   |
|-------|--------------------------------------------------|---|---|
| 85027 | BLOOD COUNT COMPLETE AUTOMATED                   | 3 | 3 |
| 87040 | CULTURE BACTERIAL BLOOD AEROBIC W/ID ISOLATES    | 3 | 3 |
| 96360 | IV INFUSION HYDRATION INITIAL 31 MIN-1 HOUR      | 4 | 3 |
| 99282 | EMERGENCY DEPARTMENT VISIT LOW/MODER SEVERITY    | 4 | 3 |
| J3490 | Injection unclassified drugs                     | 5 | 3 |
| J8499 | Prescription drug, oral, nonchemotherapeutic NOS | 5 | 3 |
| 00400 | ANES INTEG EXTREMITIES ANT TRUNK & PERINEUM NOS  | 2 | 2 |
| 17250 | #MULTIVALUE                                      | 2 | 2 |
| 27001 | TENOTOMY ADDUCTOR HIP OPEN                       | 2 | 2 |
| 27691 | TR/TRNSPL 1 TDN W/MUSC REDIRION/REROUTING DP     | 2 | 2 |
| 28008 | FASCIOTOMY FOOT&/TOE                             | 3 | 2 |
| 31526 | LARYNGOSCOPY W/WO TRACHEOSCOPY W/MICRO/TELESCOPE | 2 | 2 |
| 31624 | BRNCHSC W/BRNCL ALVEOLAR LAVAGE                  | 3 | 2 |
| 36555 | #MULTIVALUE                                      | 2 | 2 |
| 36560 | INSJ TUNNELED CTR VAD W/SUBQ PORT UNDER 5 YR     | 2 | 2 |
| 36568 | INSJ PRPH CVC W/O SUBQ PORT/PMP UNDER 5 YR       | 3 | 2 |
| 62272 | SPINAL PUNCTURE THER DRAIN CEREBROSPINAL FLUID   | 2 | 2 |
| 69436 | TYMPANOSTOMY GENERAL ANESTHESIA                  | 2 | 2 |
| 71010 | RADIOLOGIC EXAMINATION CHEST SINGLE VIEW FRONTAL | 2 | 2 |
| 74000 | RADEX ABDOMEN 1 ANTEROPOSTERIOR VIEW             | 3 | 2 |
| 76390 | MRI SPECTROSCOPY                                 | 2 | 2 |
| 81001 | URNLS DIP STICK/TABLET REAGENT AUTO MICROSCOPY   | 2 | 2 |
| 82017 | ACYLCARNITINES QUANTIATIVE EACH SPECIMEN         | 2 | 2 |
| 82040 | ALBUMIN SERUM PLASMA/WHOLE BLOOD                 | 2 | 2 |
| 82139 | AMINO ACIDS 6/> AMINO ACIDS QUANTITATIVE EA SPE  | 2 | 2 |
| 82140 | ASSAY OF AMMONIA                                 | 2 | 2 |
| 82247 | BILIRUBIN TOTAL                                  | 2 | 2 |
| 82306 | 25 HYDROXY INCLUDES FRACTIONS IF PERFORMED       | 3 | 2 |
| 82310 | CALCIUM TOTAL                                    | 2 | 2 |
| 82379 | CARNITINE QUANTITATIVE EACH SPECIMEN             | 2 | 2 |
| 82726 | VERY LONG CHAIN FATTY ACIDS                      | 2 | 2 |
| 82784 | ASSAY OF GAMMAGLOBULIN IGA IGD IGG IGM EACH      | 2 | 2 |
| 83918 | ORGANIC ACIDS TOTAL QUANTITATIVE EACH SPECIMEN   | 2 | 2 |
| 84075 | ASSAY OF PHOSPHATASE ALKALINE                    | 2 | 2 |
| 84155 | PROTEIN XCPT REFRACTOMETRY SERUM PLASMA/WHL BLD  | 2 | 2 |
| 84210 | ASSAY OF PYRUVATE                                | 2 | 2 |
| 84450 | TRANSFERASE ASPARTATE AMINO AST SGOT             | 2 | 2 |
| 84460 | TRANSFERASE ALANINE AMINO ALT SGPT               | 2 | 2 |

|       |                                                  |   |   |
|-------|--------------------------------------------------|---|---|
| 85007 | BLOOD COUNT SMEAR MCRSCP W/MNL DIFRNTL WBC COUNT | 2 | 2 |
| 87486 | IADNA CHLAMYDIA PNEUMONIAE AMPLIFIED PROBE TQ    | 2 | 2 |
| 87581 | IADNA MYCOPLSM PNEUMONIAE AMPLIFIED PROBE TQ     | 2 | 2 |
| 87798 | IADNA NOS AMPLIFIED PROBE TQ EACH ORGANISM       | 2 | 2 |
| 92526 | TX SWALLOWING DYSFUNCTION&/ORAL FUNCJ FEEDING    | 2 | 2 |
| 92585 | AUDITORY EVOKED POTENTIALS COMPREHENSIVE         | 2 | 2 |
| 94660 | #MULTIVALUE                                      | 2 | 2 |
| 95951 | LOCALIZE CEREBRAL SEIZURE CABLE/RADIO EEG/VIDEO  | 2 | 2 |
| 97162 | PHYSICAL THERAPY EVALUATION MOD COMPLEX 30 MINS  | 2 | 2 |
| 97166 | OCCUPATIONAL THERAPY EVAL MOD COMPLEX 45 MINS    | 2 | 2 |
| D1351 | Dental sealant-per tooth                         | 2 | 2 |
| D2930 | Prefabricated stainless steel crown-prim tooth   | 2 | 2 |
| D7140 | Erupted tooth or exposed root extraction         | 2 | 2 |
| G0378 | Hospital observation service, per hour           | 3 | 2 |
| J0690 | Injection cefazolin sodium, 500 mg               | 2 | 2 |
| J2060 | Injection lorazepam, 2 mg                        | 2 | 2 |
| J2250 | Injection midazolam hydrochloride, per 1 mg      | 2 | 2 |
| J2704 | Injection, propofol, 10 mg                       | 2 | 2 |
| J3010 | Injection fentanyl citrate, 0.1 mg               | 2 | 2 |
| 00126 | ANES XTRNL MID & INNER EAR W/BX TYMPANOTOMY      | 1 | 1 |
| 00170 | ANESTHESIA INTRAORAL WITH BIOPSY                 | 1 | 1 |
| 00300 | ANES INTEG MUSC & NRV HEAD NECK&POSTERIOR TRUNK  | 1 | 1 |
| 00635 | ANES DIAGNOSTIC/THERAPEUTIC LUMBAR PUNCTURE      | 1 | 1 |
| 00740 | ANES UPPER GI ENDOSCOPY PROXIMAL TO DUODENUM     | 1 | 1 |
| 00790 | ANES INTRAPERITONEAL UPPER ABDOMEN W/LAPS        | 1 | 1 |
| 00910 | ANES TRANSURETHRAL W/URETHROCYSTOSCOPY NOS       | 1 | 1 |
| 00918 | ANES TRURL FRAGMNTJ MANJ&/RMVL URETERAL CALCULUS | 1 | 1 |
| 01922 | ANES NON-INVASIVE IMAGING/RADIATION THERAPY      | 2 | 1 |
| 01992 | ANES DX/THER NERVE BLOCK/INJECTION PRONE POS     | 1 | 1 |
| 10061 | INCISION&DRAINAGE ABSCESS COMPLICATED/MULTIPLE   | 1 | 1 |
| 11100 | BX SKIN SUBCUTANEOUS&/MUCOUS MEMBRANE 1 LESION   | 1 | 1 |
| 11101 | BIOPSY SKIN SUBQ&/MUCOUS MEMBRANE EA ADDL LESN   | 1 | 1 |
| 11422 | EXC B9 LESION MRGN XCP SK TG S/N/H/F/G 1.1-2.0CM | 1 | 1 |
| 20680 | REMOVAL IMPLANT DEEP                             | 1 | 1 |
| 20999 | UNLISTED PROCEDURE MUSCSKELETAL SYSTEM GENERAL   | 1 | 1 |
| 27612 | ARTHRT PST CAPSUL RLS ANKLE W/WO ACHLL TDN LNGTH | 2 | 1 |
| 27690 | TR/TRNSPL 1 TDN W/MUSC REDIRION/REROUTING SUPFC  | 1 | 1 |
| 28300 | OSTEOTOMY CALCANEUS W/WO INTERNAL FIXATION       | 1 | 1 |



|       |                                                  |   |   |
|-------|--------------------------------------------------|---|---|
| 28304 | OSTEOTOMY TARSAL BONES OTH/THN CALCANEUS/TALUS   | 1 | 1 |
| 28760 | ARTHRD W/XTNSR HALLUCIS LONGUS TR 1ST METAR NCK  | 1 | 1 |
| 29405 | APPLICATION SHORT LEG CAST BELOW KNEE-TOE        | 1 | 1 |
| 29505 | APPLICATION LONG LEG SPLINT THIGH ANKLE/TOES     | 1 | 1 |
| 31500 | INTUBATION ENDOTRACHEAL EMERGENCY PROCEDURE      | 2 | 1 |
| 31525 | LARYNGOSCOPY W/WO TRACHEOSCOPY DX EXCEPT NEWBORN | 1 | 1 |
| 31540 | LARYNGOSCOPY EXC TUM&/STRIPPING CORDS/EPIGLOTT   | 1 | 1 |
| 31599 | UNLISTED PROCEDURE LARYNX                        | 1 | 1 |
| 31600 | TRACHEOSTOMY PLANNED SEPARATE PROCEDURE          | 1 | 1 |
| 31613 | TRACHEOSTOMA REVJ SMPL W/O FLAP ROTATION         | 2 | 1 |
| 31640 | BRONCHOSCOPY W/EXCISION TUMOR                    | 1 | 1 |
| 31899 | UNLISTED PROCEDURE TRACHEA BRONCHI               | 1 | 1 |
| 36215 | SLCTV CATHJ EA 1ST ORD THRC/BRCH/CPHLC BRNCH     | 1 | 1 |
| 36557 | INSERT TUNNELED CVC W/O SUBQ PORT/PMP AGE <5 YR  | 1 | 1 |
| 36680 | PLACEMENT NEEDLE INTRAOSSEOUS INFUSION           | 1 | 1 |
| 38500 | BX/EXC LYMPH NODE OPEN SUPERFICIAL               | 1 | 1 |
| 41010 | INCISION LINGUAL FRENUM FRENOTOMY                | 1 | 1 |
| 43244 | EGD BAND LIGATION ESOPHGEAL/GASTRIC VARICES      | 1 | 1 |
| 43324 | ESOPG/GSTR FUNDOPLASTY                           | 1 | 1 |
| 43870 | CLOSURE GASTROSTOMY SURG                         | 1 | 1 |
| 45331 | SIGMOIDOSCOPY FLX W/BIOPSY SINGLE/MULTIPLE       | 1 | 1 |
| 49320 | LAPS ABD PRM&OMENTUM DX W/WO SPEC BR/WA SPX      | 1 | 1 |
| 49450 | REPLACE GASTROSTOMY/CECOSTOMY TUBE PERCUTANEOUS  | 1 | 1 |
| 49451 | REPLACE DUODENOSTOMY/JEJUNOSTOMY TUBE PERQ       | 1 | 1 |
| 49452 | REPLACEMENT GASTRO-JEJUNOSTOMY TUBE PERCUTANEOUS | 1 | 1 |
| 49500 | RPR 1ST INGUN HRNA AGE 6 MO-5 YRS REDUCIBLE      | 1 | 1 |
| 52000 | CYSTOURETHROSCOPY                                | 1 | 1 |
| 52352 | CYSTO W/URETEROSCOPY W/RMVL/MANJ STONES          | 1 | 1 |
| 54161 | CIRCUMCISION AGE >28 DAYS                        | 1 | 1 |
| 54640 | ORCHIOPEXY INGUINAL APPROACH W/WO HERNIA RPR     | 1 | 1 |
| 54830 | EXCISION LOCAL LESION EPIDIDYMIS                 | 1 | 1 |
| 62268 | PERCUTANEOUS ASPIRATION SPINAL CORD CYST/SYRINX  | 1 | 1 |
| 64614 | CHEMODENERVATION EXTREMITY&/TRUNK MUSCLE         | 1 | 1 |
| 64640 | DSTRJ NEUROLYTIC AGENT OTHER PERIPHERAL NERVE    | 1 | 1 |
| 64642 | CHEMODENERVATION ONE EXTREMITY 1-4 MUSCLE        | 1 | 1 |
| 64643 | CHEMODENERVATION 1 EXTREMITY EA ADDL 1-4 MUSCLE  | 1 | 1 |
| 67314 | STRABISMUS RECESSIION/RESCJ 1 VER MUSC           | 1 | 1 |
| 67345 | CHEMODENERVATION EXTRAOCULAR MUSCLE              | 3 | 1 |

|       |                                                  |   |   |
|-------|--------------------------------------------------|---|---|
| 69210 | REMOVAL IMPACTED CERUMEN INSTRUMENTATION UNILAT  | 3 | 1 |
| 69421 | MYRINGOTOMY ASPIR&/EUSTACHIAN TUBE NFLTJ ANES    | 1 | 1 |
| 69424 | VENTILATING TUBE RMVL REQUIRING GENERAL ANES     | 1 | 1 |
| 70551 | MRI BRAIN BRAIN STEM W/O CONTRAST MATERIAL       | 1 | 1 |
| 71020 | RADIOLOGIC EXAM CHEST 2 VIEWS FRONTAL&LATERAL    | 1 | 1 |
| 72156 | MRI SPINAL CANAL CERVICAL W/O & W/CONTR MATRL    | 1 | 1 |
| 72157 | MRI SPINAL CANAL THORACIC W/O & W/CONTR MATRL    | 1 | 1 |
| 72158 | MRI SPINAL CANAL LUMBAR W/O & W/CONTR MATRL      | 1 | 1 |
| 74018 | RADIOLOGIC EXAM ABDOMEN 1 VIEW                   | 2 | 1 |
| 74019 | RADIOLOGIC EXAM ABDOMEN 2 VIEWS                  | 1 | 1 |
| 74230 | SWALLOWING FUNCJ W/CINERADIOGRAPY/VIDRADIOG      | 1 | 1 |
| 74241 | RADEX GI TRACT UPPER W/WO DELAYED IMAGES W/KUB   | 1 | 1 |
| 76942 | US GUIDANCE NEEDLE PLACEMENT IMG S&I             | 3 | 1 |
| 78232 | SALIVARY GLAND FUNCTION STUDY                    | 1 | 1 |
| 80061 | LIPID PANEL                                      | 1 | 1 |
| 81002 | URNLS DIP STICK/TABLET RGNT NON-AUTO W/O MICRSCP | 1 | 1 |
| 81406 | MOLECULAR PATHOLOGY PROCEDURE LEVEL 7            | 1 | 1 |
| 81479 | UNLISTED MOLELCULAR PATHOLOGY PROCEDURE          | 1 | 1 |
| 82248 | BILIRUBIN DIRECT                                 | 1 | 1 |
| 82465 | CHOLESTEROL SERUM/WHOLE BLOOD TOTAL              | 1 | 1 |
| 82542 | COL-CHR/MS NONDRUG ANALYTE NES QUAL/QUAN EA SPEC | 1 | 1 |
| 82570 | CREATININE OTHER SOURCE                          | 1 | 1 |
| 82785 | ASSAY OF GAMMAGLOBULIN IGE                       | 1 | 1 |
| 82962 | GLUC BLD GLUC MNTR DEV CLEARED FDA SPEC HOME USE | 1 | 1 |
| 83540 | ASSAY OF IRON                                    | 1 | 1 |
| 83550 | IRON BINDING CAPACITY                            | 1 | 1 |
| 83864 | MUCOPOLYSACCHARIDES ACID QUANTITATIVE            | 1 | 1 |
| 83986 | PH BODY FLUID NOT ELSEWHERE SPECIFIED            | 1 | 1 |
| 84134 | PREALBUMIN                                       | 1 | 1 |
| 84275 | ASSAY OF SIALIC ACID                             | 1 | 1 |
| 84375 | SUGARS CHROMATOGRAPHIC TLC/PAPER CHROMATOGRAPHY  | 1 | 1 |
| 84377 | SUGARS MONO DI&OLIGOS MLT QUALITATIVE EACH SPE   | 1 | 1 |
| 84436 | ASSAY OF THYROXINE TOTAL                         | 1 | 1 |
| 84443 | ASSAY OF THYROID STIMULATING HORMONE TSH         | 1 | 1 |
| 84478 | ASSAY OF TRIGLYCERIDES                           | 1 | 1 |
| 84630 | ASSAY OF ZINC                                    | 1 | 1 |
| 85004 | BLOOD COUNT AUTOMATED DIFFERENTIAL WBC COUNT     | 1 | 1 |
| 85008 | BLD COUNT SMEAR MCRSCP W/O MNL DIFRNTL WBC COUNT | 1 | 1 |

|       |                                                  |   |   |
|-------|--------------------------------------------------|---|---|
| 85014 | BLOOD COUNT HEMATOCRIT                           | 1 | 1 |
| 85018 | BLOOD COUNT HEMOGLOBIN                           | 1 | 1 |
| 86060 | ANTISTREPTOLYSIN O TITER                         | 1 | 1 |
| 86140 | C-REACTIVE PROTEIN                               | 1 | 1 |
| 87081 | CUL PRSMPTV PTHGNC ORGANISM SCRN W/COLONY ESTIMJ | 1 | 1 |
| 87086 | CULTURE BACTERIAL QUANTTATIVE COLONY COUNT URINE | 1 | 1 |
| 87497 | IADNA CYTOMEGALOVIRUS QUANTIFICATION             | 1 | 1 |
| 87533 | IADNA HERPES VIRUS-6 QUANTIFICATION              | 1 | 1 |
| 87631 | IADNA RESPIRATRY PROBE & REV TRNSCR 3-5 TARGETS  | 1 | 1 |
| 87632 | IADNA RESPIRATRY PROBE & REV TRNSCR 6-11 TARGETS | 1 | 1 |
| 87650 | IADNA STREPTOCOCCUS GROUP A DIRECT PROBE TQ      | 1 | 1 |
| 87799 | IADNA NOS QUANTIFICATION EACH ORGANISM           | 1 | 1 |
| 87880 | IAADIADOO STREPTOCOCCUS GROUP A                  | 1 | 1 |
| 90687 | IIV4 VACCINE CHILD 6-35 MO FOR IM USE            | 1 | 1 |
| 91034 | GASTROESOPHAG REFLX TEST W/CATH PH ELTRD PLCMT   | 1 | 1 |
| 92611 | MOTION FLUOR EVAL SWLNG FUNCJ C/V REC            | 1 | 1 |
| 93303 | COMPLETE TTHRC ECHO CONGENITAL CARDIAC ANOMALY   | 1 | 1 |
| 94002 | VENTILATION ASSIST & MGMT INPATIENT 1ST DAY      | 1 | 1 |
| 94668 | MANJ CHEST WALL FACILITATE LUNG FUNCTION SUBSQ   | 1 | 1 |
| 95783 | POLYSOM <6 YRS SLEEP W/CPAP/BILVL VENT 4/> PARAM | 1 | 1 |
| 95816 | ELECTROENCEPHALOGRAM W/REC AWAKE&DROWSY          | 3 | 1 |
| 95819 | ELECTROENCEPHALOGRAM W/REC AWAKE&ASLEEP          | 1 | 1 |
| 96366 | IV INFUSION THERAPY PROPHYLAXIS/DX EA HOUR       | 1 | 1 |
| 96379 | UNLISTED THERAPEUTIC PROPH/DX IV/IA NJX/NFS      | 1 | 1 |
| 97530 | THERAPEUT ACTIVITY DIRECT PT CONTACT EACH 15 MIN | 1 | 1 |
| 97760 | ORTHOTIC MGMT&TRAINJ UXTR LXTR&/TRNK EA 15       | 1 | 1 |
| 97802 | MEDICAL NUTRITION ASSMT&IVNTJ INDIV EACH 15 MI   | 1 | 1 |
| 99211 | OFFICE OUTPATIENT VISIT 5 MINUTES                | 1 | 1 |
| 99212 | OFFICE OUTPATIENT VISIT 10 MINUTES               | 2 | 1 |
| 99213 | OFFICE OUTPATIENT VISIT 15 MINUTES               | 3 | 1 |
| 99215 | OFFICE OUTPATIENT VISIT 40 MINUTES               | 1 | 1 |
| 99217 | OBSERVATION CARE DISCHARGE MANAGEMENT            | 1 | 1 |
| 99218 | INITIAL OBSERVATION CARE/DAY 30 MINUTES          | 1 | 1 |
| 99224 | SBSQ OBSERVATION CARE/DAY 15 MINUTES             | 1 | 1 |
| 99281 | EMERGENCY DEPARTMENT VISIT LIMITED/MINOR PROB    | 1 | 1 |
| 99999 | Not Defined                                      | 1 | 1 |
| A9541 | Technetium Tc-99M sulfur colloid, dxtic to 20mCi | 1 | 1 |
| A9575 | Injection gadoterate meglumine, 0.1 ml           | 1 | 1 |

|       |                                                  |   |   |
|-------|--------------------------------------------------|---|---|
| A9585 | Injection gadobutrol 0.1 ml                      | 1 | 1 |
| C1894 | Non-laser introducer/sheath, other               | 1 | 1 |
| D0220 | Intraoral first radiograph-periapical            | 1 | 1 |
| D0230 | Intraoral radiograph-periapical-each ADDL imag   | 1 | 1 |
| D0240 | Intraoral radiograph-occlusal image              | 1 | 1 |
| D0272 | Bitewings-two radiographic images                | 1 | 1 |
| D1120 | Dental prophylaxis-child                         | 1 | 1 |
| D1208 | Topical application of fluoride excl varnish     | 1 | 1 |
| D1520 | Dental space maintainer-removable-unilateral     | 1 | 1 |
| D2934 | Prefab esthetic coated steel crown-primary tooth | 1 | 1 |
| D4342 | Periodontal scaling&root planing-1-3 teeth-quad  | 1 | 1 |
| D7111 | Extraction coronal remnants-primary tooth        | 1 | 1 |
| D9222 | Deep sedation/general anesthesia - first 15 min  | 1 | 1 |
| D9223 | Deep sedation/general anesthesia-ea subsq 15 min | 1 | 1 |
| G0008 | Administration of influenza virus vaccine        | 1 | 1 |
| G0463 | Hosp OP visit for assess & mgmt of pt            | 1 | 1 |
| G9001 | Coordinated care fee, initial rate               | 1 | 1 |
| G9002 | Coordinated care fee, maintenance rate           | 1 | 1 |
| J0171 | Injection adrenalin, epinephrine, 0.1 mg         | 1 | 1 |
| J0295 | Inject ampicillin sodium/sulbactam sodium, 1.5 g | 1 | 1 |
| J0461 | Injection atropine sulfate, 0.01 mg              | 1 | 1 |
| J0696 | Injection ceftriaxone sodium, per 250 mg         | 1 | 1 |
| J1100 | Inject dexamethosone Na phosphate, 1 mg          | 1 | 1 |
| J1569 | Inject IVIG gammagard liq, non-lyophil, 500 mg   | 1 | 1 |
| J1953 | Injection levetiracetam 10 mg                    | 2 | 1 |
| J2270 | Injection morphine sulfate, up to 10 mg          | 1 | 1 |
| J2274 | Inject morphine sulfate, PF 10 mg                | 1 | 1 |
| J3360 | Injection diazepam, up to 5 mg                   | 2 | 1 |
| J7030 | Infusion, normal saline solution, 1000 cc        | 2 | 1 |
| J7040 | Infus normal saline sol, sterile (500 ml=1 unit) | 1 | 1 |
| J7042 | 5% dextrose/normal saline (500 ml=1 unit)        | 1 | 1 |
| J7050 | Infusion, normal saline solution, 250 cc         | 1 | 1 |
| J7131 | Hypertonic saline solution, 1 ml                 | 1 | 1 |
| S5010 | 5% dextrose and 0.45% normal saline, 1000 ml     | 1 | 1 |

| Drug Class | Drug Class Title                                | Therapeutic Category |
|------------|-------------------------------------------------|----------------------|
| 11         | Central nervous system and autonomic agents     | 112                  |
| 14         | Fluids nutrients and gastrointestinal agents    | 146                  |
| 11         | Central nervous system and autonomic agents     | 117                  |
| 11         | Central nervous system and autonomic agents     | 115                  |
| 11         | Central nervous system and autonomic agents     | 112                  |
| 14         | Fluids nutrients and gastrointestinal agents    | 147                  |
| 11         | Central nervous system and autonomic agents     | 116                  |
| 18         | Respiratory eye ear nose and throat agents      | 181                  |
| 14         | Fluids nutrients and gastrointestinal agents    | 146                  |
| 11         | Central nervous system and autonomic agents     | 116                  |
| 14         | Fluids nutrients and gastrointestinal agents    | 147                  |
| 11         | Central nervous system and autonomic agents     | 112                  |
| 14         | Fluids nutrients and gastrointestinal agents    | 146                  |
| 14         | Fluids nutrients and gastrointestinal agents    | 146                  |
| 14         | Fluids nutrients and gastrointestinal agents    | 146                  |
| 12         | Anti-infective agents                           | 122                  |
| 11         | Central nervous system and autonomic agents     | 112                  |
| 11         | Central nervous system and autonomic agents     | 116                  |
| 12         | Anti-infective agents                           | 124                  |
| 14         | Fluids nutrients and gastrointestinal agents    | 147                  |
| 11         | Central nervous system and autonomic agents     | 113                  |
| 16         | Hematological biological and immunologic agents | 161                  |
| 14         | Fluids nutrients and gastrointestinal agents    | 147                  |
| 11         | Central nervous system and autonomic agents     | 112                  |
| 15         | Endocrine and metabolic agents                  | 154                  |
| 14         | Fluids nutrients and gastrointestinal agents    | 147                  |
| 18         | Respiratory eye ear nose and throat agents      | 186                  |
| 11         | Central nervous system and autonomic agents     | 117                  |
| 12         | Anti-infective agents                           | 122                  |
| 15         | Endocrine and metabolic agents                  | 154                  |
| 11         | Central nervous system and autonomic agents     | 114                  |
| 14         | Fluids nutrients and gastrointestinal agents    | 146                  |
| 11         | Central nervous system and autonomic agents     | 114                  |
| 19         | Other and unclassified drugs                    | 192                  |
| 14         | Fluids nutrients and gastrointestinal agents    | 147                  |
| 15         | Endocrine and metabolic agents                  | 154                  |
| 13         | Cardiac and adrenergic agents                   | 131                  |

|    |                                                 |     |
|----|-------------------------------------------------|-----|
| 16 | Hematological biological and immunologic agents | 167 |
| 16 | Hematological biological and immunologic agents | 164 |
| 14 | Fluids nutrients and gastrointestinal agents    | 146 |
| 12 | Anti-infective agents                           | 124 |
| 14 | Fluids nutrients and gastrointestinal agents    | 146 |
| 19 | Other and unclassified drugs                    | 199 |
| 12 | Anti-infective agents                           | 125 |
| 12 | Anti-infective agents                           | 122 |
| 11 | Central nervous system and autonomic agents     | 113 |
| 14 | Fluids nutrients and gastrointestinal agents    | 141 |
| 19 | Other and unclassified drugs                    | 191 |
| 18 | Respiratory eye ear nose and throat agents      | 188 |
| 18 | Respiratory eye ear nose and throat agents      | 181 |
| 14 | Fluids nutrients and gastrointestinal agents    | 146 |
| 13 | Cardiac and adrenergic agents                   | 133 |
| 11 | Central nervous system and autonomic agents     | 112 |
| 15 | Endocrine and metabolic agents                  | 154 |
| 14 | Fluids nutrients and gastrointestinal agents    | 147 |
| 11 | Central nervous system and autonomic agents     | 116 |
| 13 | Cardiac and adrenergic agents                   | 131 |
| 14 | Fluids nutrients and gastrointestinal agents    | 147 |
| 14 | Fluids nutrients and gastrointestinal agents    | 147 |
| 12 | Anti-infective agents                           | 129 |
| 14 | Fluids nutrients and gastrointestinal agents    | 146 |
| 11 | Central nervous system and autonomic agents     | 119 |
| 16 | Hematological biological and immunologic agents | 161 |
| 11 | Central nervous system and autonomic agents     | 115 |
| 14 | Fluids nutrients and gastrointestinal agents    | 147 |
| 14 | Fluids nutrients and gastrointestinal agents    | 147 |
| 14 | Fluids nutrients and gastrointestinal agents    | 147 |
| 12 | Anti-infective agents                           | 121 |
| 14 | Fluids nutrients and gastrointestinal agents    | 147 |
| 10 | Pharmaceuticals and drugs unspecified           | 100 |
| 19 | Other and unclassified drugs                    | 199 |
| 14 | Fluids nutrients and gastrointestinal agents    | 146 |
| 14 | Fluids nutrients and gastrointestinal agents    | 146 |
| 14 | Fluids nutrients and gastrointestinal agents    | 147 |
| 15 | Endocrine and metabolic agents                  | 154 |

|    |                                                 |     |
|----|-------------------------------------------------|-----|
| 11 | Central nervous system and autonomic agents     | 116 |
| 14 | Fluids nutrients and gastrointestinal agents    | 146 |
| 19 | Other and unclassified drugs                    | 192 |
| 18 | Respiratory eye ear nose and throat agents      | 186 |
| 14 | Fluids nutrients and gastrointestinal agents    | 146 |
| 12 | Anti-infective agents                           | 124 |
| 14 | Fluids nutrients and gastrointestinal agents    | 146 |
| 14 | Fluids nutrients and gastrointestinal agents    | 141 |
| 16 | Hematological biological and immunologic agents | 161 |
| 11 | Central nervous system and autonomic agents     | 113 |
| 14 | Fluids nutrients and gastrointestinal agents    | 141 |
| 14 | Fluids nutrients and gastrointestinal agents    | 141 |
| 14 | Fluids nutrients and gastrointestinal agents    | 146 |
| 11 | Central nervous system and autonomic agents     | 112 |
| 14 | Fluids nutrients and gastrointestinal agents    | 146 |
| 14 | Fluids nutrients and gastrointestinal agents    | 147 |
| 15 | Endocrine and metabolic agents                  | 154 |
| 14 | Fluids nutrients and gastrointestinal agents    | 146 |
| 13 | Cardiac and adrenergic agents                   | 133 |
| 14 | Fluids nutrients and gastrointestinal agents    | 146 |
| 16 | Hematological biological and immunologic agents | 167 |
| 12 | Anti-infective agents                           | 121 |
| 14 | Fluids nutrients and gastrointestinal agents    | 142 |
| 13 | Cardiac and adrenergic agents                   | 131 |
| 11 | Central nervous system and autonomic agents     | 112 |
| 12 | Anti-infective agents                           | 125 |
| 12 | Anti-infective agents                           | 125 |
| 15 | Endocrine and metabolic agents                  | 154 |
| 14 | Fluids nutrients and gastrointestinal agents    | 146 |
| 11 | Central nervous system and autonomic agents     | 116 |
| 12 | Anti-infective agents                           | 125 |
| 19 | Other and unclassified drugs                    | 191 |
| 16 | Hematological biological and immunologic agents | 167 |
| 12 | Anti-infective agents                           | 127 |
| 16 | Hematological biological and immunologic agents | 167 |
| 17 | Antineoplastic and diagnostic agents            | 171 |
| 14 | Fluids nutrients and gastrointestinal agents    | 145 |
| 11 | Central nervous system and autonomic agents     | 114 |

|    |                                                 |     |
|----|-------------------------------------------------|-----|
| 14 | Fluids nutrients and gastrointestinal agents    | 147 |
| 14 | Fluids nutrients and gastrointestinal agents    | 146 |
| 17 | Antineoplastic and diagnostic agents            | 174 |
| 16 | Hematological biological and immunologic agents | 167 |
| 13 | Cardiac and adrenergic agents                   | 134 |
| 17 | Antineoplastic and diagnostic agents            | 171 |
| 17 | Antineoplastic and diagnostic agents            | 171 |
| 12 | Anti-infective agents                           | 121 |
| 14 | Fluids nutrients and gastrointestinal agents    | 146 |
| 14 | Fluids nutrients and gastrointestinal agents    | 147 |
| 11 | Central nervous system and autonomic agents     | 115 |
| 14 | Fluids nutrients and gastrointestinal agents    | 147 |
| 12 | Anti-infective agents                           | 121 |
| 17 | Antineoplastic and diagnostic agents            | 174 |
| 11 | Central nervous system and autonomic agents     | 115 |
| 11 | Central nervous system and autonomic agents     | 116 |
| 16 | Hematological biological and immunologic agents | 161 |
| 18 | Respiratory eye ear nose and throat agents      | 186 |
| 18 | Respiratory eye ear nose and throat agents      | 181 |
| 11 | Central nervous system and autonomic agents     | 112 |
| 12 | Anti-infective agents                           | 123 |
| 12 | Anti-infective agents                           | 127 |
| 13 | Cardiac and adrenergic agents                   | 133 |
| 11 | Central nervous system and autonomic agents     | 117 |
| 17 | Antineoplastic and diagnostic agents            | 171 |
| 12 | Anti-infective agents                           | 125 |
| 14 | Fluids nutrients and gastrointestinal agents    | 146 |
| 17 | Antineoplastic and diagnostic agents            | 171 |
| 12 | Anti-infective agents                           | 124 |
| 16 | Hematological biological and immunologic agents | 164 |
| 14 | Fluids nutrients and gastrointestinal agents    | 141 |
| 18 | Respiratory eye ear nose and throat agents      | 186 |
| 14 | Fluids nutrients and gastrointestinal agents    | 142 |
| 11 | Central nervous system and autonomic agents     | 119 |
| 12 | Anti-infective agents                           | 123 |
| 14 | Fluids nutrients and gastrointestinal agents    | 147 |
| 14 | Fluids nutrients and gastrointestinal agents    | 147 |
| 17 | Antineoplastic and diagnostic agents            | 171 |



|    |                                                 |     |
|----|-------------------------------------------------|-----|
| 11 | Central nervous system and autonomic agents     | 115 |
| 12 | Anti-infective agents                           | 124 |
| 14 | Fluids nutrients and gastrointestinal agents    | 141 |
| 14 | Fluids nutrients and gastrointestinal agents    | 146 |
| 12 | Anti-infective agents                           | 124 |
| 11 | Central nervous system and autonomic agents     | 115 |
| 14 | Fluids nutrients and gastrointestinal agents    | 144 |
| 11 | Central nervous system and autonomic agents     | 116 |
| 18 | Respiratory eye ear nose and throat agents      | 186 |
| 12 | Anti-infective agents                           | 127 |
| 18 | Respiratory eye ear nose and throat agents      | 186 |
| 19 | Other and unclassified drugs                    | 192 |
| 11 | Central nervous system and autonomic agents     | 117 |
| 14 | Fluids nutrients and gastrointestinal agents    | 141 |
| 12 | Anti-infective agents                           | 122 |
| 14 | Fluids nutrients and gastrointestinal agents    | 141 |
| 14 | Fluids nutrients and gastrointestinal agents    | 146 |
| 11 | Central nervous system and autonomic agents     | 119 |
| 12 | Anti-infective agents                           | 121 |
| 13 | Cardiac and adrenergic agents                   | 131 |
| 14 | Fluids nutrients and gastrointestinal agents    | 146 |
| 14 | Fluids nutrients and gastrointestinal agents    | 147 |
| 16 | Hematological biological and immunologic agents | 167 |
| 11 | Central nervous system and autonomic agents     | 113 |
| 12 | Anti-infective agents                           | 124 |
| 14 | Fluids nutrients and gastrointestinal agents    | 146 |
| 14 | Fluids nutrients and gastrointestinal agents    | 142 |
| 12 | Anti-infective agents                           | 127 |
| 19 | Other and unclassified drugs                    | 192 |
| 15 | Endocrine and metabolic agents                  | 154 |
| 12 | Anti-infective agents                           | 121 |
| 15 | Endocrine and metabolic agents                  | 154 |
| 14 | Fluids nutrients and gastrointestinal agents    | 146 |
| 14 | Fluids nutrients and gastrointestinal agents    | 146 |
| 19 | Other and unclassified drugs                    | 191 |
| 11 | Central nervous system and autonomic agents     | 116 |
| 17 | Antineoplastic and diagnostic agents            | 175 |
| 15 | Endocrine and metabolic agents                  | 154 |

|    |                                                 |     |
|----|-------------------------------------------------|-----|
| 17 | Antineoplastic and diagnostic agents            | 174 |
| 12 | Anti-infective agents                           | 122 |
| 12 | Anti-infective agents                           | 122 |
| 14 | Fluids nutrients and gastrointestinal agents    | 145 |
| 18 | Respiratory eye ear nose and throat agents      | 189 |
| 11 | Central nervous system and autonomic agents     | 116 |
| 14 | Fluids nutrients and gastrointestinal agents    | 146 |
| 13 | Cardiac and adrenergic agents                   | 131 |
| 16 | Hematological biological and immunologic agents | 161 |
| 11 | Central nervous system and autonomic agents     | 112 |
| 11 | Central nervous system and autonomic agents     | 115 |
| 14 | Fluids nutrients and gastrointestinal agents    | 146 |
| 17 | Antineoplastic and diagnostic agents            | 174 |
| 12 | Anti-infective agents                           | 122 |
| 19 | Other and unclassified drugs                    | 199 |
| 12 | Anti-infective agents                           | 122 |
| 12 | Anti-infective agents                           | 122 |
| 12 | Anti-infective agents                           | 124 |
| 14 | Fluids nutrients and gastrointestinal agents    | 145 |
| 11 | Central nervous system and autonomic agents     | 119 |
| 14 | Fluids nutrients and gastrointestinal agents    | 146 |
| 15 | Endocrine and metabolic agents                  | 157 |
| 12 | Anti-infective agents                           | 123 |
| 15 | Endocrine and metabolic agents                  | 154 |
| 17 | Antineoplastic and diagnostic agents            | 171 |
| 11 | Central nervous system and autonomic agents     | 116 |
| 14 | Fluids nutrients and gastrointestinal agents    | 146 |
| 17 | Antineoplastic and diagnostic agents            | 171 |
| 12 | Anti-infective agents                           | 127 |
| 17 | Antineoplastic and diagnostic agents            | 175 |
| 17 | Antineoplastic and diagnostic agents            | 175 |
| 12 | Anti-infective agents                           | 124 |
| 19 | Other and unclassified drugs                    | 191 |
| 12 | Anti-infective agents                           | 122 |
| 12 | Anti-infective agents                           | 121 |
| 12 | Anti-infective agents                           | 127 |
| 14 | Fluids nutrients and gastrointestinal agents    | 145 |
| 14 | Fluids nutrients and gastrointestinal agents    | 145 |

|    |                                                 |     |
|----|-------------------------------------------------|-----|
| 19 | Other and unclassified drugs                    | 191 |
| 11 | Central nervous system and autonomic agents     | 113 |
| 11 | Central nervous system and autonomic agents     | 112 |
| 13 | Cardiac and adrenergic agents                   | 133 |
| 14 | Fluids nutrients and gastrointestinal agents    | 147 |
| 11 | Central nervous system and autonomic agents     | 115 |
| 12 | Anti-infective agents                           | 121 |
| 11 | Central nervous system and autonomic agents     | 116 |
| 14 | Fluids nutrients and gastrointestinal agents    | 147 |
| 16 | Hematological biological and immunologic agents | 167 |
| 12 | Anti-infective agents                           | 125 |
| 18 | Respiratory eye ear nose and throat agents      | 182 |
| 11 | Central nervous system and autonomic agents     | 112 |
| 13 | Cardiac and adrenergic agents                   | 132 |
| 13 | Cardiac and adrenergic agents                   | 135 |
| 14 | Fluids nutrients and gastrointestinal agents    | 141 |
| 11 | Central nervous system and autonomic agents     | 117 |
| 12 | Anti-infective agents                           | 129 |
| 14 | Fluids nutrients and gastrointestinal agents    | 147 |
| 17 | Antineoplastic and diagnostic agents            | 171 |
| 17 | Antineoplastic and diagnostic agents            | 171 |
| 11 | Central nervous system and autonomic agents     | 112 |
| 16 | Hematological biological and immunologic agents | 161 |
| 19 | Other and unclassified drugs                    | 192 |
| 12 | Anti-infective agents                           | 122 |
| 12 | Anti-infective agents                           | 124 |
| 13 | Cardiac and adrenergic agents                   | 134 |
| 15 | Endocrine and metabolic agents                  | 154 |
| 15 | Endocrine and metabolic agents                  | 154 |
| 16 | Hematological biological and immunologic agents | 164 |
| 11 | Central nervous system and autonomic agents     | 116 |
| 12 | Anti-infective agents                           | 124 |
| 16 | Hematological biological and immunologic agents | 161 |
| 19 | Other and unclassified drugs                    | 192 |
| 12 | Anti-infective agents                           | 125 |
| 17 | Antineoplastic and diagnostic agents            | 174 |
| 11 | Central nervous system and autonomic agents     | 116 |
| 14 | Fluids nutrients and gastrointestinal agents    | 141 |

|    |                                                 |     |
|----|-------------------------------------------------|-----|
| 11 | Central nervous system and autonomic agents     | 112 |
| 11 | Central nervous system and autonomic agents     | 117 |
| 17 | Antineoplastic and diagnostic agents            | 175 |
| 11 | Central nervous system and autonomic agents     | 114 |
| 13 | Cardiac and adrenergic agents                   | 131 |
| 14 | Fluids nutrients and gastrointestinal agents    | 147 |
| 16 | Hematological biological and immunologic agents | 161 |
| 12 | Anti-infective agents                           | 124 |
| 14 | Fluids nutrients and gastrointestinal agents    | 147 |
| 14 | Fluids nutrients and gastrointestinal agents    | 147 |
| 15 | Endocrine and metabolic agents                  | 154 |
| 11 | Central nervous system and autonomic agents     | 112 |
| 14 | Fluids nutrients and gastrointestinal agents    | 145 |
| 19 | Other and unclassified drugs                    | 191 |
| 13 | Cardiac and adrenergic agents                   | 131 |
| 17 | Antineoplastic and diagnostic agents            | 171 |
| 11 | Central nervous system and autonomic agents     | 112 |
| 12 | Anti-infective agents                           | 124 |
| 12 | Anti-infective agents                           | 125 |
| 12 | Anti-infective agents                           | 125 |
| 12 | Anti-infective agents                           | 127 |
| 14 | Fluids nutrients and gastrointestinal agents    | 141 |
| 19 | Other and unclassified drugs                    | 192 |
| 16 | Hematological biological and immunologic agents | 164 |
| 19 | Other and unclassified drugs                    | 192 |
| 12 | Anti-infective agents                           | 125 |
| 14 | Fluids nutrients and gastrointestinal agents    | 147 |
| 18 | Respiratory eye ear nose and throat agents      | 188 |
| 11 | Central nervous system and autonomic agents     | 115 |
| 18 | Respiratory eye ear nose and throat agents      | 186 |
| 13 | Cardiac and adrenergic agents                   | 131 |
| 13 | Cardiac and adrenergic agents                   | 131 |
| 13 | Cardiac and adrenergic agents                   | 131 |
| 14 | Fluids nutrients and gastrointestinal agents    | 141 |
| 14 | Fluids nutrients and gastrointestinal agents    | 147 |
| 14 | Fluids nutrients and gastrointestinal agents    | 147 |
| 16 | Hematological biological and immunologic agents | 161 |
| 16 | Hematological biological and immunologic agents | 164 |

|    |                                                 |     |
|----|-------------------------------------------------|-----|
| 18 | Respiratory eye ear nose and throat agents      | 186 |
| 18 | Respiratory eye ear nose and throat agents      | 188 |
| 11 | Central nervous system and autonomic agents     | 114 |
| 11 | Central nervous system and autonomic agents     | 115 |
| 12 | Anti-infective agents                           | 124 |
| 12 | Anti-infective agents                           | 125 |
| 13 | Cardiac and adrenergic agents                   | 133 |
| 14 | Fluids nutrients and gastrointestinal agents    | 147 |
| 15 | Endocrine and metabolic agents                  | 158 |
| 16 | Hematological biological and immunologic agents | 161 |
| 16 | Hematological biological and immunologic agents | 164 |
| 18 | Respiratory eye ear nose and throat agents      | 186 |
| 18 | Respiratory eye ear nose and throat agents      | 188 |
| 12 | Anti-infective agents                           | 124 |
| 13 | Cardiac and adrenergic agents                   | 131 |
| 14 | Fluids nutrients and gastrointestinal agents    | 141 |
| 19 | Other and unclassified drugs                    | 191 |
| 11 | Central nervous system and autonomic agents     | 116 |
| 13 | Cardiac and adrenergic agents                   | 134 |
| 15 | Endocrine and metabolic agents                  | 153 |
| 15 | Endocrine and metabolic agents                  | 154 |
| 16 | Hematological biological and immunologic agents | 167 |
| 16 | Hematological biological and immunologic agents | 167 |
| 19 | Other and unclassified drugs                    | 192 |
| 11 | Central nervous system and autonomic agents     | 114 |
| 12 | Anti-infective agents                           | 121 |
| 12 | Anti-infective agents                           | 122 |
| 12 | Anti-infective agents                           | 123 |
| 12 | Anti-infective agents                           | 124 |
| 12 | Anti-infective agents                           | 124 |
| 12 | Anti-infective agents                           | 127 |
| 13 | Cardiac and adrenergic agents                   | 131 |
| 13 | Cardiac and adrenergic agents                   | 133 |
| 13 | Cardiac and adrenergic agents                   | 139 |
| 14 | Fluids nutrients and gastrointestinal agents    | 146 |
| 14 | Fluids nutrients and gastrointestinal agents    | 146 |
| 14 | Fluids nutrients and gastrointestinal agents    | 147 |
| 14 | Fluids nutrients and gastrointestinal agents    | 147 |

|    |                                                 |     |
|----|-------------------------------------------------|-----|
| 15 | Endocrine and metabolic agents                  | 153 |
| 15 | Endocrine and metabolic agents                  | 154 |
| 16 | Hematological biological and immunologic agents | 161 |
| 16 | Hematological biological and immunologic agents | 164 |
| 16 | Hematological biological and immunologic agents | 164 |
| 17 | Antineoplastic and diagnostic agents            | 175 |
| 19 | Other and unclassified drugs                    | 191 |
| 19 | Other and unclassified drugs                    | 191 |
| 19 | Other and unclassified drugs                    | 192 |
| 19 | Other and unclassified drugs                    | 192 |
| 19 | Other and unclassified drugs                    | 192 |
| 11 | Central nervous system and autonomic agents     | 115 |
| 11 | Central nervous system and autonomic agents     | 116 |
| 12 | Anti-infective agents                           | 121 |
| 12 | Anti-infective agents                           | 121 |
| 12 | Anti-infective agents                           | 123 |
| 13 | Cardiac and adrenergic agents                   | 131 |
| 13 | Cardiac and adrenergic agents                   | 131 |
| 13 | Cardiac and adrenergic agents                   | 137 |
| 14 | Fluids nutrients and gastrointestinal agents    | 146 |
| 15 | Endocrine and metabolic agents                  | 154 |
| 17 | Antineoplastic and diagnostic agents            | 174 |
| 18 | Respiratory eye ear nose and throat agents      | 183 |
| 18 | Respiratory eye ear nose and throat agents      | 188 |
| 11 | Central nervous system and autonomic agents     | 111 |
| 11 | Central nervous system and autonomic agents     | 113 |
| 11 | Central nervous system and autonomic agents     | 114 |
| 12 | Anti-infective agents                           | 125 |
| 12 | Anti-infective agents                           | 125 |
| 14 | Fluids nutrients and gastrointestinal agents    | 146 |
| 15 | Endocrine and metabolic agents                  | 153 |
| 16 | Hematological biological and immunologic agents | 167 |
| 17 | Antineoplastic and diagnostic agents            | 174 |
| 18 | Respiratory eye ear nose and throat agents      | 183 |
| 11 | Central nervous system and autonomic agents     | 112 |
| 11 | Central nervous system and autonomic agents     | 112 |
| 11 | Central nervous system and autonomic agents     | 112 |
| 11 | Central nervous system and autonomic agents     | 113 |

|    |                                                 |     |
|----|-------------------------------------------------|-----|
| 11 | Central nervous system and autonomic agents     | 113 |
| 11 | Central nervous system and autonomic agents     | 113 |
| 11 | Central nervous system and autonomic agents     | 114 |
| 11 | Central nervous system and autonomic agents     | 114 |
| 11 | Central nervous system and autonomic agents     | 115 |
| 11 | Central nervous system and autonomic agents     | 116 |
| 12 | Anti-infective agents                           | 121 |
| 12 | Anti-infective agents                           | 122 |
| 12 | Anti-infective agents                           | 123 |
| 12 | Anti-infective agents                           | 124 |
| 12 | Anti-infective agents                           | 127 |
| 13 | Cardiac and adrenergic agents                   | 131 |
| 13 | Cardiac and adrenergic agents                   | 138 |
| 14 | Fluids nutrients and gastrointestinal agents    | 141 |
| 14 | Fluids nutrients and gastrointestinal agents    | 141 |
| 14 | Fluids nutrients and gastrointestinal agents    | 142 |
| 14 | Fluids nutrients and gastrointestinal agents    | 147 |
| 14 | Fluids nutrients and gastrointestinal agents    | 147 |
| 14 | Fluids nutrients and gastrointestinal agents    | 147 |
| 14 | Fluids nutrients and gastrointestinal agents    | 147 |
| 14 | Fluids nutrients and gastrointestinal agents    | 147 |
| 15 | Endocrine and metabolic agents                  | 151 |
| 15 | Endocrine and metabolic agents                  | 153 |
| 15 | Endocrine and metabolic agents                  | 154 |
| 16 | Hematological biological and immunologic agents | 161 |
| 16 | Hematological biological and immunologic agents | 161 |
| 16 | Hematological biological and immunologic agents | 161 |
| 16 | Hematological biological and immunologic agents | 164 |
| 16 | Hematological biological and immunologic agents | 164 |
| 17 | Antineoplastic and diagnostic agents            | 171 |
| 17 | Antineoplastic and diagnostic agents            | 173 |
| 17 | Antineoplastic and diagnostic agents            | 174 |
| 18 | Respiratory eye ear nose and throat agents      | 181 |
| 18 | Respiratory eye ear nose and throat agents      | 183 |
| 18 | Respiratory eye ear nose and throat agents      | 186 |
| 18 | Respiratory eye ear nose and throat agents      | 189 |
| 19 | Other and unclassified drugs                    | 192 |
| 11 | Central nervous system and autonomic agents     | 113 |
| 11 | Central nervous system and autonomic agents     | 115 |







|    |                                                 |     |
|----|-------------------------------------------------|-----|
| 15 | Endocrine and metabolic agents                  | 154 |
| 15 | Endocrine and metabolic agents                  | 154 |
| 15 | Endocrine and metabolic agents                  | 154 |
| 15 | Endocrine and metabolic agents                  | 154 |
| 15 | Endocrine and metabolic agents                  | 155 |
| 16 | Hematological biological and immunologic agents | 161 |
| 16 | Hematological biological and immunologic agents | 161 |
| 16 | Hematological biological and immunologic agents | 161 |
| 16 | Hematological biological and immunologic agents | 161 |
| 16 | Hematological biological and immunologic agents | 164 |
| 16 | Hematological biological and immunologic agents | 164 |
| 16 | Hematological biological and immunologic agents | 164 |
| 16 | Hematological biological and immunologic agents | 164 |
| 16 | Hematological biological and immunologic agents | 164 |
| 16 | Hematological biological and immunologic agents | 164 |
| 16 | Hematological biological and immunologic agents | 164 |
| 16 | Hematological biological and immunologic agents | 167 |
| 16 | Hematological biological and immunologic agents | 167 |
| 17 | Antineoplastic and diagnostic agents            | 171 |
| 17 | Antineoplastic and diagnostic agents            | 173 |
| 17 | Antineoplastic and diagnostic agents            | 174 |
| 17 | Antineoplastic and diagnostic agents            | 174 |
| 17 | Antineoplastic and diagnostic agents            | 175 |
| 17 | Antineoplastic and diagnostic agents            | 175 |
| 17 | Antineoplastic and diagnostic agents            | 175 |
| 18 | Respiratory eye ear nose and throat agents      | 181 |
| 18 | Respiratory eye ear nose and throat agents      | 187 |
| 18 | Respiratory eye ear nose and throat agents      | 188 |
| 18 | Respiratory eye ear nose and throat agents      | 189 |
| 19 | Other and unclassified drugs                    | 191 |
| 19 | Other and unclassified drugs                    | 191 |
| 19 | Other and unclassified drugs                    | 191 |
| 19 | Other and unclassified drugs                    | 191 |
| 19 | Other and unclassified drugs                    | 191 |
| 19 | Other and unclassified drugs                    | 192 |
| 19 | Other and unclassified drugs                    | 192 |
| 19 | Other and unclassified drugs                    | 192 |
| 19 | Other and unclassified drugs                    | 192 |
| 19 | Other and unclassified drugs                    | 192 |

| Therapeutic Category Title          | Generic Drug | Generic Drug Title                                   |
|-------------------------------------|--------------|------------------------------------------------------|
| Analgesic and antipyretic           | 112201       | Acetaminophen (APAP) (N-acetyl-P-aminophenol)        |
| Electrolyte and replenishment agent | 146218       | Sodium chloride                                      |
| Skeletal muscle relaxant            | 117211       | Baclofen                                             |
| Anesthetic                          | 115235       | Propofol                                             |
| Analgesic and antipyretic           | 112115       | Fentanyl (base) (citrate)                            |
| Gastrointestinal agent              | 147835       | Ondansetron HCl                                      |
| Anticonvulsant                      | 116001       | Levetiracetam                                        |
| Bronchodilator                      | 181211       | Albuterol (sulfate)                                  |
| Electrolyte and replenishment agent | 146435       | Multiple electrolyte solutions                       |
| Anticonvulsant                      | 116047       | Gabapentin                                           |
| Gastrointestinal agent              | 147533       | Polyethylene glycol-electrolyte solution             |
| Analgesic and antipyretic           | 112260       | Ibuprofen                                            |
| Electrolyte and replenishment agent | 146455       | Dextrose and sodium chloride with potassium chloride |
| Electrolyte and replenishment agent | 146451       | Dextrose and sodium chloride                         |
| Electrolyte and replenishment agent | 146060       | Dextrose in water                                    |
| Cephalosporin/macrolide             | 122231       | Ceftriaxone sodium                                   |
| Analgesic and antipyretic           | 112131       | Morphine sulfate                                     |
| Anticonvulsant                      | 116037       | Clonazepam                                           |
| Misc antibiotic/sulfa               | 124133       | Vancomycin (HCl)                                     |
| Gastrointestinal agent              | 147421       | Glycopyrrolate                                       |
| Psychotherapeutic                   | 113133       | Lorazepam                                            |
| Hematological agent                 | 161307       | Heparin sodium                                       |
| Gastrointestinal agent              | 147205       | Lansoprazole                                         |
| Analgesic and antipyretic           | 112201       | Acetaminophen (APAP) (N-acetyl-P-aminophenol)        |
| Corticosteroid                      | 154021       | Budesonide                                           |
| Gastrointestinal agent              | 147111       | Ranitidine (HCl) ( bismuth citrate)                  |
| Antihistamine and decongestant      | 186027       | Diphenhydramine (citrate) (HCl)                      |
| Skeletal muscle relaxant            | 117155       | Rocuronium bromide                                   |
| Cephalosporin/macrolide             | 122109       | Cefazolin sodium                                     |
| Corticosteroid                      | 154035       | Dexamethasone                                        |
| Sedative hypnotic                   | 114035       | Midazolam HCl                                        |
| Electrolyte and replenishment agent | 146167       | Potassium chloride                                   |
| Sedative hypnotic                   | 114055       | Dexmedetomidine HCl                                  |
| Skin preparation                    | 192483       | Chlorhexidine (gluconate)                            |
| Gastrointestinal agent              | 147835       | Ondansetron HCl                                      |
| Corticosteroid                      | 154063       | Hydrocortisone                                       |
| Antiarrhythmic/adrenergic agent     | 131141       | Lidocaine HCl                                        |

|                                     |        |                                                         |
|-------------------------------------|--------|---------------------------------------------------------|
| Immunologic agent                   | 167135 | Tacrolimus (FK 506)                                     |
| Biological                          | 164121 | Immune globulin                                         |
| Electrolyte and replenishment agent | 146075 | Sterile water                                           |
| Misc antibiotic/sulfa               | 124451 | Sulfamethoxazole and trimethoprim (co-trimoxazole)      |
| Electrolyte and replenishment agent | 146147 | Magnesium sulfate                                       |
| Unclassified therapeutic agent      | 199995 | Compounding agents                                      |
| Urinary anti-infective/antifungals  | 125217 | Voriconazole                                            |
| Cephalosporin/macrolide             | 122252 | Cefepime HCl                                            |
| Psychotherapeutic                   | 113117 | Diazepam                                                |
| Vitamin                             | 141320 | Multiple vitamins                                       |
| Renal and genitourinary agent       | 191135 | Furosemide                                              |
| Ophthalmic preparation              | 188307 | Artificial tear solutions inserts and ocular lubricants |
| Bronchodilator                      | 181311 | Ipratropium bromide                                     |
| Electrolyte and replenishment agent | 146075 | Sterile water                                           |
| Vasodilator/calcium channel blocker | 133201 | Amlodipine                                              |
| Analgesic and antipyretic           | 112135 | Oxycodone HCl                                           |
| Corticosteroid                      | 154071 | Methylprednisolone                                      |
| Gastrointestinal agent              | 147421 | Glycopyrrolate                                          |
| Anticonvulsant                      | 116001 | Levetiracetam                                           |
| Antiarrhythmic/adrenergic agent     | 131141 | Lidocaine HCl                                           |
| Gastrointestinal agent              | 147215 | Omeprazole                                              |
| Gastrointestinal agent              | 147105 | Famotidine                                              |
| Miscellaneous anti-infective        | 129121 | Pentamidine isethionate                                 |
| Electrolyte and replenishment agent | 146218 | Sodium chloride                                         |
| Antidote                            | 119215 | Neostigmine (bromide) (methylsulfate)                   |
| Hematological agent                 | 161120 | Filgrastim G-CSF                                        |
| Anesthetic                          | 115321 | Bupivacaine HCl                                         |
| Gastrointestinal agent              | 147105 | Famotidine                                              |
| Gastrointestinal agent              | 147211 | Pantoprazole sodium                                     |
| Gastrointestinal agent              | 147525 | Glycerin                                                |
| Aminoglycoside/penicillin           | 121265 | Piperacillin sodium and tazobactam sodium               |
| Gastrointestinal agent              | 147865 | Ursodiol (urodeoxycholic acid)                          |
| Unknown                             | 100000 | Pharmaceuticals and drugs unspecified                   |
| Unclassified therapeutic agent      | 199800 | Homeopathic preparations                                |
| Electrolyte and replenishment agent | 146011 | Crystalline amino acids                                 |
| Electrolyte and replenishment agent | 146070 | Fat emulsions                                           |
| Gastrointestinal agent              | 147611 | Simethicone                                             |
| Corticosteroid                      | 154087 | Triamcinolone                                           |

|                                            |        |                                                                |
|--------------------------------------------|--------|----------------------------------------------------------------|
| Anticonvulsant                             | 116034 | Clobazam                                                       |
| Electrolyte and replenishment agent        | 146225 | Sodium phosphate                                               |
| Skin preparation                           | 192533 | Petrolatum                                                     |
| Antihistamine and decongestant             | 186027 | Diphenhydramine (citrate) (HCl)                                |
| Electrolyte and replenishment agent        | 146211 | Sodium acetate                                                 |
| Misc antibiotic/sulfa                      | 124143 | Clindamycin (HCl) (palmitate) (phosphate)                      |
| Electrolyte and replenishment agent        | 146117 | Calcium chloride                                               |
| Vitamin                                    | 141320 | Multiple vitamins                                              |
| Hematological agent                        | 161511 | Alteplase (tPA)                                                |
| Psychotherapeutic                          | 113133 | Lorazepam                                                      |
| Vitamin                                    | 141118 | Cholecalciferol (D3)                                           |
| Vitamin                                    | 141325 | Vitamin combinations with iron/minerals                        |
| Electrolyte and replenishment agent        | 146143 | Magnesium (carbonate) (chelate) (chloride) (gluconate) (lactat |
| Analgesic and antipyretic                  | 112201 | Acetaminophen (APAP) (N-acetyl-P-aminophenol)                  |
| Electrolyte and replenishment agent        | 146040 | Hyperalimentation solutions unspecified                        |
| Gastrointestinal agent                     | 147527 | Lactulose                                                      |
| Corticosteroid                             | 154081 | Prednisolone                                                   |
| Electrolyte and replenishment agent        | 146215 | Sodium bicarbonate                                             |
| Vasodilator/calcium channel blocker        | 133141 | Hydralazine HCl                                                |
| Electrolyte and replenishment agent        | 146143 | Magnesium (carbonate) (chelate) (chloride) (gluconate) (lactat |
| Immunologic agent                          | 167127 | Mycophenolate (mofetil) (sodium)                               |
| Aminoglycoside/penicillin                  | 121217 | Amoxicillin trihydrate                                         |
| Nutritive supplement                       | 142015 | Levocarnitine (L-carnitine)                                    |
| Antiarrhythmic/adrenergic agent            | 131321 | Epinephrine                                                    |
| Analgesic and antipyretic                  | 112270 | Ketorolac tromethamine                                         |
| Urinary anti-infective/antifungals         | 125275 | Nystatin                                                       |
| Urinary anti-infective/antifungals         | 125225 | Fluconazole                                                    |
| Corticosteroid                             | 154063 | Hydrocortisone                                                 |
| Electrolyte and replenishment agent        | 146218 | Sodium chloride                                                |
| Anticonvulsant                             | 116005 | Oxcarbazepine                                                  |
| Urinary anti-infective/antifungals         | 125215 | Caspofungin acetate                                            |
| Renal and genitourinary agent              | 191135 | Furosemide                                                     |
| Immunologic agent                          | 167127 | Mycophenolate (mofetil) (sodium)                               |
| Antiviral/amebicide/antihelmintic/pediculo | 127101 | Acyclovir (sodium) (acycloguanosine)                           |
| Immunologic agent                          | 167135 | Tacrolimus (FK 506)                                            |
| Antineoplastic agent                       | 171217 | Fludarabine phosphate                                          |
| Metals and minerals                        | 145035 | Trace metal combinations                                       |
| Sedative hypnotic                          | 114035 | Midazolam HCl                                                  |

|                                            |        |                                                          |
|--------------------------------------------|--------|----------------------------------------------------------|
| Gastrointestinal agent                     | 147111 | Ranitidine (HCl) ( bismuth citrate)                      |
| Electrolyte and replenishment agent        | 146215 | Sodium bicarbonate                                       |
| Radiopaque agent                           | 174109 | Iopamidol                                                |
| Immunologic agent                          | 167135 | Tacrolimus (FK 506)                                      |
| Antihypertensive agent                     | 134125 | Clonidine HCl                                            |
| Antineoplastic agent                       | 171601 | Alemtuzumab                                              |
| Antineoplastic agent                       | 171927 | Hydroxyurea                                              |
| Aminoglycoside/penicillin                  | 121231 | Ampicillin sodium and sulbactam sodium                   |
| Electrolyte and replenishment agent        | 146218 | Sodium chloride                                          |
| Gastrointestinal agent                     | 147305 | Magnesia (magnesium hydroxide)                           |
| Anesthetic                                 | 115230 | Ketamine HCl                                             |
| Gastrointestinal agent                     | 147505 | Senna                                                    |
| Aminoglycoside/penicillin                  | 121221 | Amoxicillin trihydrate and potassium clavulanate         |
| Radiopaque agent                           | 174115 | Ioversol                                                 |
| Anesthetic                                 | 115411 | Ropivacaine HCl                                          |
| Anticonvulsant                             | 116035 | Carbamazepine                                            |
| Hematological agent                        | 161615 | Albumin human                                            |
| Antihistamine and decongestant             | 186011 | Cetirizine HCl                                           |
| Bronchodilator                             | 181231 | Levalbuterol HCl                                         |
| Analgesic and antipyretic                  | 112117 | Hydromorphone HCl                                        |
| Tetracycline/fluoroquinolone               | 123215 | Levofloxacin                                             |
| Antiviral/amebicide/antihelmintic/pediculo | 127121 | Oseltamivir phosphate                                    |
| Vasodilator/calcium channel blocker        | 133221 | Isradipine                                               |
| Skeletal muscle relaxant                   | 117211 | Baclofen                                                 |
| Antineoplastic agent                       | 171111 | Melphalan                                                |
| Urinary anti-infective/antifungals         | 125275 | Nystatin                                                 |
| Electrolyte and replenishment agent        | 146173 | Potassium phosphate                                      |
| Antineoplastic agent                       | 171611 | Rituximab                                                |
| Misc antibiotic/sulfa                      | 124157 | Bacitracin (zinc)                                        |
| Biological                                 | 164353 | Influenza virus vaccine                                  |
| Vitamin                                    | 141116 | Ergocalciferol (D2)                                      |
| Antihistamine and decongestant             | 186063 | Oxymetazoline HCl                                        |
| Nutritive supplement                       | 142015 | Levocarnitine (L-carnitine)                              |
| Antidote                                   | 119325 | Botulinum toxin type A                                   |
| Tetracycline/fluoroquinolone               | 123201 | Ciprofloxacin (HCl)                                      |
| Gastrointestinal agent                     | 147525 | Glycerin                                                 |
| Gastrointestinal agent                     | 147521 | Mineral oil                                              |
| Antineoplastic agent                       | 171131 | Thiotepa (triethylenethiophosphoramidate) (TSPA) (TESPA) |

|                                             |        |                                                  |
|---------------------------------------------|--------|--------------------------------------------------|
| Anesthetic                                  | 115325 | Bupivacaine HCl and epinephrine HCl              |
| Misc antibiotic/sulfa                       | 124164 | Metronidazole (HCl)                              |
| Vitamin                                     | 141135 | Phytonadione (K1)                                |
| Electrolyte and replenishment agent         | 146461 | Dextrose and electrolytes                        |
| Misc antibiotic/sulfa                       | 124143 | Clindamycin (HCl) (palmitate) (phosphate)        |
| Anesthetic                                  | 115473 | Lidocaine HCl and prilocaine HCl                 |
| Iron                                        | 144001 | Ferrous sulfate (exsiccated)                     |
| Anticonvulsant                              | 116023 | Lacosamide                                       |
| Antihistamine and decongestant              | 186021 | Cyproheptadine HCl                               |
| Antiviral/amebicide/antihelminthic/pediculo | 127101 | Acyclovir (sodium) (acycloguanosine)             |
| Antihistamine and decongestant              | 186053 | Promethazine HCl                                 |
| Skin preparation                            | 192799 | Other specified skin preparations                |
| Skeletal muscle relaxant                    | 117171 | Vecuronium bromide                               |
| Vitamin                                     | 141305 | Vitamin A and D                                  |
| Cephalosporin/macrolide                     | 122421 | Azithromycin (dihydrate)                         |
| Vitamin                                     | 141221 | Pyridoxine (B6)                                  |
| Electrolyte and replenishment agent         | 146115 | Calcium carbonate                                |
| Antidote                                    | 119117 | Sugammadex                                       |
| Aminoglycoside/penicillin                   | 121225 | Ampicillin (anhydrous) (sodium) (trihydrate)     |
| Antiarrhythmic/adrenergic agent             | 131321 | Epinephrine                                      |
| Electrolyte and replenishment agent         | 146121 | Calcium gluconate                                |
| Gastrointestinal agent                      | 147507 | Bisacodyl                                        |
| Immunologic agent                           | 167115 | Cyclosporine                                     |
| Psychotherapeutic                           | 113117 | Diazepam                                         |
| Misc antibiotic/sulfa                       | 124171 | Mupirocin (calcium) (pseudomonic acid A)         |
| Electrolyte and replenishment agent         | 146167 | Potassium chloride                               |
| Nutritive supplement                        | 142035 | Lactobacillus (L acidophilus) (L bulgaricus)     |
| Antiviral/amebicide/antihelminthic/pediculo | 127113 | Ganciclovir (sodium) (DHPG)                      |
| Skin preparation                            | 192505 | Emollients and bath dermatologicals              |
| Corticosteroid                              | 154083 | Prednisone                                       |
| Aminoglycoside/penicillin                   | 121135 | Tobramycin sulfate                               |
| Corticosteroid                              | 154013 | Beclomethasone dipropionate                      |
| Electrolyte and replenishment agent         | 146000 | Electrolyte and replenishment agents unspecified |
| Electrolyte and replenishment agent         | 146215 | Sodium bicarbonate                               |
| Renal and genitourinary agent               | 191111 | Chlorothiazide (sodium)                          |
| Anticonvulsant                              | 116015 | Fosphenytoin sodium                              |
| Radiopharmaceutical                         | 175213 | Gadobutrol                                       |
| Corticosteroid                              | 154063 | Hydrocortisone                                   |

|                                             |        |                                              |
|---------------------------------------------|--------|----------------------------------------------|
| Radiopaque agent                            | 174173 | Diatrizoate meglumine and diatrizoate sodium |
| Cephalosporin/macrolide                     | 122202 | Cefdinir                                     |
| Cephalosporin/macrolide                     | 122401 | Erythromycin                                 |
| Metals and minerals                         | 145031 | Selenium (selenious acid)                    |
| Otic/mouth preparation                      | 189015 | Mouthwashes sprays and troches               |
| Anticonvulsant                              | 116061 | Topiramate                                   |
| Electrolyte and replenishment agent         | 146421 | Citrate and citric acid combinations         |
| Antiarrhythmic/adrenergic agent             | 131301 | Atropine sulfate                             |
| Hematological agent                         | 161375 | Flush combination solutions                  |
| Analgesic and antipyretic                   | 112158 | Narcotic analgesic combinations              |
| Anesthetic                                  | 115371 | Lidocaine HCl and epinephrine HCl            |
| Electrolyte and replenishment agent         | 146441 | Sodium chloride and potassium chloride       |
| Radiopaque agent                            | 174311 | Barium sulfate                               |
| Cephalosporin/macrolide                     | 122401 | Erythromycin                                 |
| Unclassified therapeutic agent              | 199997 | Investigational drugs                        |
| Cephalosporin/macrolide                     | 122115 | Cephalexin (HCl) (monohydrate)               |
| Cephalosporin/macrolide                     | 122171 | Cefoxitin sodium                             |
| Misc antibiotic/sulfa                       | 124164 | Metronidazole (HCl)                          |
| Metals and minerals                         | 145005 | Zinc                                         |
| Antidote                                    | 119175 | Naloxone HCl                                 |
| Electrolyte and replenishment agent         | 146163 | Potassium acetate                            |
| Antigout agent                              | 157021 | Probenecid                                   |
| Tetracycline/fluoroquinolone                | 123201 | Ciprofloxacin (HCl)                          |
| Corticosteroid                              | 154041 | Fludrocortisone acetate                      |
| Antineoplastic agent                        | 171607 | Palivizumab                                  |
| Anticonvulsant                              | 116051 | Lamotrigine                                  |
| Electrolyte and replenishment agent         | 146075 | Sterile water                                |
| Antineoplastic agent                        | 171125 | Busulfan                                     |
| Antiviral/amebicide/antihelminthic/pediculo | 127103 | Cidofovir                                    |
| Radiopharmaceutical                         | 175133 | Technetium Tc99m pentetate (DTPA)            |
| Radiopharmaceutical                         | 175214 | Gadobenate dimeglumine                       |
| Misc antibiotic/sulfa                       | 124118 | Meropenem                                    |
| Renal and genitourinary agent               | 191141 | Spirolactone                                 |
| Cephalosporin/macrolide                     | 122221 | Ceftazidime                                  |
| Aminoglycoside/penicillin                   | 121135 | Tobramycin sulfate                           |
| Antiviral/amebicide/antihelminthic/pediculo | 127135 | Valganciclovir HCl                           |
| Metals and minerals                         | 145005 | Zinc                                         |
| Metals and minerals                         | 145015 | Copper (chloride) (gluconate) (sulfate)      |



|                                     |        |                                         |
|-------------------------------------|--------|-----------------------------------------|
| Renal and genitourinary agent       | 191111 | Chlorothiazide (sodium)                 |
| Psychotherapeutic                   | 113428 | Risperidone                             |
| Analgesic and antipyretic           | 112131 | Morphine sulfate                        |
| Vasodilator/calcium channel blocker | 133135 | Papaverine HCl                          |
| Gastrointestinal agent              | 147523 | Docusate (calcium) (potassium) (sodium) |
| Anesthetic                          | 115145 | Sevoflurane                             |
| Aminoglycoside/penicillin           | 121105 | Gentamicin (sulfate)                    |
| Anticonvulsant                      | 116007 | Zonisamide                              |
| Gastrointestinal agent              | 147433 | Dicyclomine HCl                         |
| Immunologic agent                   | 167115 | Cyclosporine                            |
| Urinary anti-infective/antifungals  | 125245 | Ketoconazole                            |
| Leukotriene agent                   | 182011 | Montelukast sodium                      |
| Analgesic and antipyretic           | 112228 | Tramadol HCl                            |
| Alpha/beta-adrenergic blocker       | 132210 | Carvedilol                              |
| Angiotensin agent                   | 135111 | Enalapril maleate                       |
| Vitamin                             | 141205 | Riboflavin (B2)                         |
| Skeletal muscle relaxant            | 117115 | Cisatracurium besylate                  |
| Miscellaneous anti-infective        | 129125 | Silver nitrate                          |
| Gastrointestinal agent              | 147711 | Metoclopramide HCl                      |
| Antineoplastic agent                | 171103 | Cyclophosphamide                        |
| Antineoplastic agent                | 171941 | Mesna                                   |
| Analgesic and antipyretic           | 112127 | Methadone HCl                           |
| Hematological agent                 | 161513 | Defibrotide sodium                      |
| Skin preparation                    | 192549 | Other specified skin protectants        |
| Cephalosporin/macrolide             | 122211 | Cefotaxime sodium                       |
| Misc antibiotic/sulfa               | 124185 | Antibiotic combinations                 |
| Antihypertensive agent              | 134125 | Clonidine HCl                           |
| Corticosteroid                      | 154035 | Dexamethasone                           |
| Corticosteroid                      | 154055 | Fluticasone                             |
| Biological                          | 164315 | Pneumococcal vaccine                    |
| Anticonvulsant                      | 116023 | Lacosamide                              |
| Misc antibiotic/sulfa               | 124190 | Antibiotic and steroid combinations     |
| Hematological agent                 | 161327 | Enoxaparin sodium                       |
| Skin preparation                    | 192567 | Diaper rash products                    |
| Urinary anti-infective/antifungals  | 125217 | Voriconazole                            |
| Radiopaque agent                    | 174107 | Iohexol                                 |
| Anticonvulsant                      | 116021 | Phenytoin (extended) (prompt) (sodium)  |
| Vitamin                             | 141315 | Calcium and vitamin D                   |

|                                             |        |                                                      |
|---------------------------------------------|--------|------------------------------------------------------|
| Analgesic and antipyretic                   | 112143 | Remifentanil HCl                                     |
| Skeletal muscle relaxant                    | 117161 | Succinylcholine chloride                             |
| Radiopharmaceutical                         | 175151 | Technetium Tc99m sulfur colloid                      |
| Sedative hypnotic                           | 114016 | Phenobarbital (sodium)                               |
| Antiarrhythmic/adrenergic agent             | 131355 | Phenylephrine HCl                                    |
| Gastrointestinal agent                      | 147315 | Antacid combinations                                 |
| Hematological agent                         | 161465 | Absorbable gelatin (sterile)                         |
| Misc antibiotic/sulfa                       | 124451 | Sulfamethoxazole and trimethoprim (co-trimoxazole)   |
| Gastrointestinal agent                      | 147250 | Sucralfate                                           |
| Gastrointestinal agent                      | 147813 | Scopolamine HBr                                      |
| Corticosteroid                              | 154045 | Fluocinolone acetonide                               |
| Analgesic and antipyretic                   | 112205 | Aspirin (acetylsalicylic acid) (ASA)                 |
| Metals and minerals                         | 145001 | Manganese (chelate) (chloride) (gluconate) (sulfate) |
| Renal and genitourinary agent               | 191233 | Bethanechol chloride                                 |
| Antiarrhythmic/adrenergic agent             | 131105 | Digoxin                                              |
| Antineoplastic agent                        | 171970 | Ruxolitinib                                          |
| Analgesic and antipyretic                   | 112127 | Methadone HCl                                        |
| Misc antibiotic/sulfa                       | 124137 | Linezolid                                            |
| Urinary anti-infective/antifungals          | 125216 | Micafungin sodium                                    |
| Urinary anti-infective/antifungals          | 125225 | Fluconazole                                          |
| Antiviral/amebicide/antihelminthic/pediculo | 127107 | Foscarnet sodium (phosphonoformic acid) (PFA)        |
| Vitamin                                     | 141135 | Phytonadione (K1)                                    |
| Skin preparation                            | 192555 | Carbamide peroxide                                   |
| Biological                                  | 164305 | Haemophilus B conjugate vaccine                      |
| Skin preparation                            | 192489 | Other specified antiseptics germicides and cleansers |
| Urinary anti-infective/antifungals          | 125201 | Amphotericin B                                       |
| Gastrointestinal agent                      | 147711 | Metoclopramide HCl                                   |
| Ophthalmic preparation                      | 188321 | Ophthalmic irrigation solutions                      |
| Anesthetic                                  | 115000 | Anesthetics unspecified                              |
| Antihistamine and decongestant              | 186003 | Azelastine                                           |
| Antiarrhythmic/adrenergic agent             | 131311 | Dopamine HCl                                         |
| Antiarrhythmic/adrenergic agent             | 131315 | Ephedrine (sulfate)                                  |
| Antiarrhythmic/adrenergic agent             | 131351 | Norepinephrine bitartrate (levarterenol)             |
| Vitamin                                     | 141201 | Thiamine HCl (B1)                                    |
| Gastrointestinal agent                      | 147501 | Electrolyte laxatives                                |
| Gastrointestinal agent                      | 147521 | Mineral oil                                          |
| Hematological agent                         | 161461 | Microfibrillar collagen hemostat                     |
| Biological                                  | 164130 | Lymphocyte immune globulin                           |

|                                           |        |                                                            |
|-------------------------------------------|--------|------------------------------------------------------------|
| Antihistamine and decongestant            | 186080 | Antihistamine and decongestant combinations                |
| Ophthalmic preparation                    | 188217 | Cyclopentolate HCl and phenylephrine HCl                   |
| Sedative hypnotic                         | 114016 | Phenobarbital (sodium)                                     |
| Anesthetic                                | 115470 | Local anesthetic combinations                              |
| Misc antibiotic/sulfa                     | 124157 | Bacitracin (zinc)                                          |
| Urinary anti-infective/antifungals        | 125220 | Clotrimazole                                               |
| Vasodilator/calcium channel blocker       | 133231 | Nifedipine                                                 |
| Gastrointestinal agent                    | 147211 | Pantoprazole sodium                                        |
| Miscellaneous endocrine agent             | 158011 | Octreotide acetate                                         |
| Hematological agent                       | 161455 | Thrombin                                                   |
| Biological                                | 164433 | Diphtheria/tetanus/pertussis/hepatitis B and polio vaccine |
| Antihistamine and decongestant            | 186041 | Loratadine                                                 |
| Ophthalmic preparation                    | 188215 | Cyclopentolate HCl                                         |
| Misc antibiotic/sulfa                     | 124129 | Daptomycin                                                 |
| Antiarrhythmic/adrenergic agent           | 131141 | Lidocaine HCl                                              |
| Vitamin                                   | 141251 | Folic acid                                                 |
| Renal and genitourinary agent             | 191113 | Hydrochlorothiazide                                        |
| Anticonvulsant                            | 116067 | Valproic acid and derivatives                              |
| Antihypertensive agent                    | 134135 | Guanfacine HCl                                             |
| Antidiabetic agent                        | 153305 | Metformin HCl                                              |
| Corticosteroid                            | 154021 | Budesonide                                                 |
| Immunologic agent                         | 167126 | Tocilizumab                                                |
| Immunologic agent                         | 167137 | Sirolimus                                                  |
| Skin preparation                          | 192810 | Saliva substitutes                                         |
| Sedative hypnotic                         | 114015 | Pentobarbital sodium                                       |
| Aminoglycoside/penicillin                 | 121135 | Tobramycin sulfate                                         |
| Cephalosporin/macrolide                   | 122421 | Azithromycin (dihydrate)                                   |
| Tetracycline/fluoroquinolone              | 123215 | Levofloxacin                                               |
| Misc antibiotic/sulfa                     | 124153 | Polymyxin B sulfate and trimethoprim sulfate               |
| Misc antibiotic/sulfa                     | 124190 | Antibiotic and steroid combinations                        |
| Antiviral/amebicide/anthelmintic/pediculo | 127865 | Permethrin                                                 |
| Antiarrhythmic/adrenergic agent           | 131355 | Phenylephrine HCl                                          |
| Vasodilator/calcium channel blocker       | 133225 | Nicardipine HCl                                            |
| Other cardiac/adrenergic agent            | 139101 | Sodium polystyrene sulfonate                               |
| Electrolyte and replenishment agent       | 146041 | Hyperalimentation solution and electrolyte combinations    |
| Electrolyte and replenishment agent       | 146415 | Phosphorous replacement electrolyte combinations           |
| Gastrointestinal agent                    | 147541 | Sodium phosphate and sodium biphosphate                    |
| Gastrointestinal agent                    | 147758 | Digestive enzymes                                          |

|                                     |        |                                                        |
|-------------------------------------|--------|--------------------------------------------------------|
| Antidiabetic agent                  | 153110 | Insulin R                                              |
| Corticosteroid                      | 154005 | Cosyntropin                                            |
| Hematological agent                 | 161499 | Other specified coagulants                             |
| Biological                          | 164111 | Cytomegalovirus immune globulin intravenous (CMV-IGIV) |
| Biological                          | 164131 | Antithymocyte globulin rabbit                          |
| Radiopharmaceutical                 | 175218 | Gadoterate meglumine                                   |
| Renal and genitourinary agent       | 191131 | Bumetanide                                             |
| Renal and genitourinary agent       | 191193 | Mannitol                                               |
| Skin preparation                    | 192319 | Hyaluronidase                                          |
| Skin preparation                    | 192481 | Povidine-iodine                                        |
| Skin preparation                    | 192481 | Povidine-iodine                                        |
| Anesthetic                          | 115395 | Proparacaine HCl                                       |
| Anticonvulsant                      | 116002 | Brivaracetam                                           |
| Aminoglycoside/penicillin           | 121101 | Amikacin sulfate                                       |
| Aminoglycoside/penicillin           | 121251 | Oxacillin sodium                                       |
| Tetracycline/fluoroquinolone        | 123225 | Moxifloxacin HCl                                       |
| Antiarrhythmic/adrenergic agent     | 131111 | Milrinone lactate                                      |
| Antiarrhythmic/adrenergic agent     | 131301 | Atropine sulfate                                       |
| Antilipemic agent                   | 137111 | Cholestyramine                                         |
| Electrolyte and replenishment agent | 146218 | Sodium chloride                                        |
| Corticosteroid                      | 154003 | Corticotropin                                          |
| Radiopaque agent                    | 174311 | Barium sulfate                                         |
| Inhalant product                    | 183011 | Acetylcysteine                                         |
| Ophthalmic preparation              | 188213 | Tropicamide                                            |
| Stimulant                           | 111075 | Methylphenidate HCl                                    |
| Psychotherapeutic                   | 113265 | Trazodone HCl                                          |
| Sedative hypnotic                   | 114077 | Zolpidem tartrate                                      |
| Urinary anti-infective/antifungals  | 125240 | Itraconazole                                           |
| Urinary anti-infective/antifungals  | 125325 | Terbinafine HCl                                        |
| Electrolyte and replenishment agent | 146147 | Magnesium sulfate                                      |
| Antidiabetic agent                  | 153161 | Insulin lispro                                         |
| Immunologic agent                   | 167114 | Vedolizumab                                            |
| Radiopaque agent                    | 174161 | Iothalamate meglumine                                  |
| Inhalant product                    | 183036 | Budesonide and formoterol                              |
| Analgesic and antipyretic           | 112125 | Meperidine HCl                                         |
| Analgesic and antipyretic           | 112264 | Indomethacin (sodium trihydrate)                       |
| Analgesic and antipyretic           | 112270 | Ketorolac tromethamine                                 |
| Psychotherapeutic                   | 113115 | Clorazepate dipotassium                                |

|                                            |        |                                              |
|--------------------------------------------|--------|----------------------------------------------|
| Psychotherapeutic                          | 113117 | Diazepam                                     |
| Psychotherapeutic                          | 113461 | Olanzapine                                   |
| Sedative hypnotic                          | 114035 | Midazolam HCl                                |
| Sedative hypnotic                          | 114051 | Chloral hydrate                              |
| Anesthetic                                 | 115315 | Benzocaine (ethyl amino benzoate)            |
| Anticonvulsant                             | 116067 | Valproic acid and derivatives                |
| Aminoglycoside/penicillin                  | 121201 | Penicillin G (aqueous) (potassium) (sodium)  |
| Cephalosporin/macrolide                    | 122177 | Cefuroxime (axetil) (sodium)                 |
| Tetracycline/fluoroquinolone               | 123201 | Ciprofloxacin (HCl)                          |
| Misc antibiotic/sulfa                      | 124147 | Colistimethate sodium                        |
| Antiviral/amebicide/antihelmintic/pediculo | 127125 | Ribavirin                                    |
| Antiarrhythmic/adrenergic agent            | 131141 | Lidocaine HCl                                |
| Sclerosing agent                           | 138915 | Alcohol (absolute) (dehydrated)              |
| Vitamin                                    | 141241 | Ascorbic acid (C)                            |
| Vitamin                                    | 141255 | Leucovorin calcium                           |
| Nutritive supplement                       | 142005 | Glutamic acid HCl                            |
| Gastrointestinal agent                     | 147201 | Esomeprazole                                 |
| Gastrointestinal agent                     | 147521 | Mineral oil                                  |
| Gastrointestinal agent                     | 147525 | Glycerin                                     |
| Gastrointestinal agent                     | 147833 | Granisetron HCl                              |
| Hormone                                    | 151225 | Oxytocin                                     |
| Antidiabetic agent                         | 153401 | Glucagon HCl                                 |
| Corticosteroid                             | 154031 | Desonide                                     |
| Hematological agent                        | 161130 | Sargramostim GM-CSF                          |
| Hematological agent                        | 161441 | Aminocaproic acid                            |
| Hematological agent                        | 161445 | Tranexamic acid                              |
| Biological                                 | 164317 | Pneumococcal 7-valent conjugate vaccine      |
| Biological                                 | 164363 | Hepatitis B vaccine                          |
| Antineoplastic agent                       | 171125 | Busulfan                                     |
| Diagnostic aid                             | 173065 | Tuberculin purified protein derivative (PPD) |
| Radiopaque agent                           | 174161 | Iothalamate meglumine                        |
| Bronchodilator                             | 181315 | Albuterol sulfate and ipratropium bromide    |
| Inhalant product                           | 183015 | Dornase alfa                                 |
| Antihistamine and decongestant             | 186053 | Promethazine HCl                             |
| Otic/mouth preparation                     | 189010 | Otic preparations                            |
| Skin preparation                           | 192510 | Lubricants                                   |
| Psychotherapeutic                          | 113475 | Aripiprazole                                 |
| Anesthetic                                 | 115110 | Desflurane                                   |

|                                     |        |                                        |
|-------------------------------------|--------|----------------------------------------|
| Anticonvulsant                      | 116041 | Felbamate                              |
| Cephalosporin/macrolide             | 122231 | Ceftriaxone sodium                     |
| Antihypertensive agent              | 134171 | Tamsulosin                             |
| Electrolyte and replenishment agent | 146050 | L-cysteine HCl                         |
| Hormone                             | 151161 | Norethindrone (acetate)                |
| Thyroid agent                       | 155015 | Levothyroxine sodium                   |
| Hematological agent                 | 161105 | Epoetin alfa (erythropoietin) (EPO)    |
| Unclassified therapeutic agent      | 199001 | Placebo                                |
| Stimulant                           | 111021 | Caffeine (anhydrous) (citrate)         |
| Stimulant                           | 111021 | Caffeine (anhydrous) (citrate)         |
| Analgesic and antipyretic           | 112117 | Hydromorphone HCl                      |
| Analgesic and antipyretic           | 112125 | Meperidine HCl                         |
| Analgesic and antipyretic           | 112264 | Indomethacin (sodium trihydrate)       |
| Psychotherapeutic                   | 113135 | Hydroxyzine (HCl) (pamoate)            |
| Psychotherapeutic                   | 113135 | Hydroxyzine (HCl) (pamoate)            |
| Psychotherapeutic                   | 113468 | Quetiapine fumarate                    |
| Anesthetic                          | 115311 | Articaine and epinephrine HCl          |
| Anesthetic                          | 115415 | Tetracaine                             |
| Anticonvulsant                      | 116002 | Brivaracetam                           |
| Anticonvulsant                      | 116021 | Phenytoin (extended) (prompt) (sodium) |
| Anticonvulsant                      | 116025 | Ethosuximide                           |
| Anticonvulsant                      | 116049 | Pregabalin                             |
| Skeletal muscle relaxant            | 117241 | Methocarbamol                          |
| Skeletal muscle relaxant            | 117241 | Methocarbamol                          |
| Skeletal muscle relaxant            | 117255 | Tizanidine HCl                         |
| Antiparkinson agent                 | 118025 | Trihexphenidyl HCl                     |
| Antidote                            | 119131 | Flumazenil                             |
| Antidote                            | 119325 | Botulinum toxin type A                 |
| Aminoglycoside/penicillin           | 121215 | Penicillin V potassium                 |
| Cephalosporin/macrolide             | 122207 | Cefixime                               |
| Cephalosporin/macrolide             | 122271 | Ceftaroline fosamil                    |
| Tetracycline/fluoroquinolone        | 123235 | Ofloxacin                              |
| Misc antibiotic/sulfa               | 124121 | Aztreonam                              |
| Misc antibiotic/sulfa               | 124137 | Linezolid                              |
| Misc antibiotic/sulfa               | 124157 | Bacitracin (zinc)                      |
| Misc antibiotic/sulfa               | 124185 | Antibiotic combinations                |
| Misc antibiotic/sulfa               | 124411 | Silver sulfadiazine                    |
| Urinary anti-infective/antifungals  | 125290 | Econazole nitrate                      |

|                                             |        |                                                    |
|---------------------------------------------|--------|----------------------------------------------------|
| Urinary anti-infective/antifungals          | 125335 | Antifungal and steroid combinations                |
| Antimalarial/antituberculous agent          | 126245 | Rifampin                                           |
| Antiviral/amebicide/antihelminthic/pediculo | 127133 | Valacyclovir HCl                                   |
| Miscellaneous anti-infective                | 129105 | Dapsone (DDS)                                      |
| Antiarrhythmic/adrenergic agent             | 131301 | Atropine sulfate                                   |
| Antiarrhythmic/adrenergic agent             | 131305 | Dobutamine HCl                                     |
| Alpha/beta-adrenergic blocker               | 132105 | Atenolol                                           |
| Alpha/beta-adrenergic blocker               | 132125 | Esmolol HCl                                        |
| Alpha/beta-adrenergic blocker               | 132151 | Propranolol HCl                                    |
| Sclerosing agent                            | 138915 | Alcohol (absolute) (dehydrated)                    |
| Vitamin                                     | 141130 | Vitamin E                                          |
| Vitamin                                     | 141201 | Thiamine HCl (B1)                                  |
| Vitamin                                     | 141221 | Pyridoxine (B6)                                    |
| Vitamin                                     | 141241 | Ascorbic acid (C)                                  |
| Vitamin                                     | 141255 | Leucovorin calcium                                 |
| Dialysis solution                           | 143029 | Other specified dialysis solutions                 |
| Metals and minerals                         | 145005 | Zinc                                               |
| Metals and minerals                         | 145021 | Chromium chloride                                  |
| Electrolyte and replenishment agent         | 146000 | Electrolyte and replenishment agents unspecified   |
| Electrolyte and replenishment agent         | 146100 | Calcium unspecified                                |
| Electrolyte and replenishment agent         | 146140 | Magnesium unspecified                              |
| Electrolyte and replenishment agent         | 146160 | Potassium unspecified                              |
| Electrolyte and replenishment agent         | 146200 | Sodium unspecified                                 |
| Electrolyte and replenishment agent         | 146218 | Sodium chloride                                    |
| Electrolyte and replenishment agent         | 146225 | Sodium phosphate                                   |
| Electrolyte and replenishment agent         | 146435 | Multiple electrolyte solutions                     |
| Gastrointestinal agent                      | 147255 | Misoprostol                                        |
| Gastrointestinal agent                      | 147415 | L-hyoscyamine sulfate                              |
| Gastrointestinal agent                      | 147435 | Gastrointestinal cocktail combinations             |
| Gastrointestinal agent                      | 147465 | Infliximab                                         |
| Gastrointestinal agent                      | 147507 | Bisacodyl                                          |
| Gastrointestinal agent                      | 147517 | Methylcellulose and other bulk producing laxatives |
| Gastrointestinal agent                      | 147548 | Laxative combinations                              |
| Gastrointestinal agent                      | 147548 | Laxative combinations                              |
| Hormone                                     | 151157 | Megestrol acetate                                  |
| Hormone                                     | 151471 | Vasopressin                                        |
| Antidiabetic agent                          | 153167 | Insulin detemir                                    |
| Antidiabetic agent                          | 153171 | Insulin glargine                                   |

|                               |        |                                                              |
|-------------------------------|--------|--------------------------------------------------------------|
| Corticosteroid                | 154015 | Betamethasone                                                |
| Corticosteroid                | 154033 | Desoximetasone                                               |
| Corticosteroid                | 154055 | Fluticasone                                                  |
| Corticosteroid                | 154073 | Mometasone furoate                                           |
| Thyroid agent                 | 155015 | Levothyroxine sodium                                         |
| Hematological agent           | 161120 | Filgrastim G-CSF                                             |
| Hematological agent           | 161441 | Aminocaproic acid                                            |
| Hematological agent           | 161463 | Oxidized cellulose                                           |
| Hematological agent           | 161465 | Absorbable gelatin (sterile)                                 |
| Biological                    | 164313 | Meningococcal vaccine                                        |
| Biological                    | 164315 | Pneumococcal vaccine                                         |
| Biological                    | 164351 | Poliovirus vaccine (IPV) (OPV)                               |
| Biological                    | 164361 | Hepatitis A vaccine                                          |
| Biological                    | 164421 | Diphtheria and tetanus toxoids (Dt) (Td)                     |
| Biological                    | 164432 | Diphtheria/tetanus/pertussis/poliovirus/haemophophilus B vac |
| Immunologic agent             | 167105 | Azathioprine                                                 |
| Immunologic agent             | 167131 | Pimecrolimus                                                 |
| Antineoplastic agent          | 171201 | Methotrexate (amethopterin) (MTX) (sodium)                   |
| Diagnostic aid                | 173087 | Fludeoxyglucose (F18)                                        |
| Radiopaque agent              | 174100 | Nonionic contrast media unspecified                          |
| Radiopaque agent              | 174143 | Diatrizoate meglumine                                        |
| Radiopharmaceutical           | 175137 | Technetium Tc99m red blood cell                              |
| Radiopharmaceutical           | 175145 | Technetium Tc99m sodium pertechnetate                        |
| Radiopharmaceutical           | 175215 | Gadopentetate dimeglumine                                    |
| Bronchodilator                | 181111 | Aminophylline (theophylline ethylenediamine)                 |
| Antitussive and expectorant   | 187021 | Guaifenesin                                                  |
| Ophthalmic preparation        | 188227 | Ophthalmic decongestant combinations                         |
| Otic/mouth preparation        | 189015 | Mouthwashes sprays and troches                               |
| Renal and genitourinary agent | 191121 | Metolazone                                                   |
| Renal and genitourinary agent | 191133 | Ethacrynic acid (sodium)                                     |
| Renal and genitourinary agent | 191145 | Acetazolamide (sodium)                                       |
| Renal and genitourinary agent | 191221 | Potassium acid phosphate                                     |
| Renal and genitourinary agent | 191321 | Sildenafil citrate                                           |
| Skin preparation              | 192531 | Benzoin (compound)                                           |
| Skin preparation              | 192551 | Aluminum acetate                                             |
| Skin preparation              | 192571 | Topical antipruritics                                        |
| Skin preparation              | 192575 | Phenol                                                       |
| Skin preparation              | 192589 | Other specified astringents and skin irritation agents       |



| Route Of Administration | Route Of Administration Title | N Visits | N Patients |
|-------------------------|-------------------------------|----------|------------|
| 10                      | oral                          | 302      | 93         |
| 20                      | parenteral                    | 257      | 83         |
| 10                      | oral                          | 166      | 52         |
| 20                      | parenteral                    | 163      | 77         |
| 20                      | parenteral                    | 147      | 73         |
| 20                      | parenteral                    | 146      | 61         |
| 10                      | oral                          | 146      | 42         |
| 42                      | inhalation                    | 141      | 37         |
| 20                      | parenteral                    | 140      | 54         |
| 10                      | oral                          | 140      | 46         |
| 10                      | oral                          | 132      | 52         |
| 10                      | oral                          | 129      | 57         |
| 20                      | parenteral                    | 128      | 55         |
| 20                      | parenteral                    | 120      | 60         |
| 20                      | parenteral                    | 112      | 50         |
| 20                      | parenteral                    | 98       | 43         |
| 20                      | parenteral                    | 94       | 65         |
| 10                      | oral                          | 94       | 24         |
| 20                      | parenteral                    | 90       | 48         |
| 20                      | parenteral                    | 89       | 51         |
| 20                      | parenteral                    | 85       | 54         |
| 20                      | parenteral                    | 85       | 43         |
| 10                      | oral                          | 84       | 22         |
| 20                      | parenteral                    | 83       | 46         |
| 42                      | inhalation                    | 83       | 13         |
| 10                      | oral                          | 78       | 33         |
| 20                      | parenteral                    | 77       | 37         |
| 20                      | parenteral                    | 76       | 54         |
| 20                      | parenteral                    | 76       | 51         |
| 20                      | parenteral                    | 75       | 46         |
| 20                      | parenteral                    | 75       | 41         |
| 20                      | parenteral                    | 74       | 43         |
| 20                      | parenteral                    | 71       | 43         |
| 40                      | topical                       | 71       | 29         |
| 10                      | oral                          | 70       | 31         |
| 20                      | parenteral                    | 67       | 30         |
| 20                      | parenteral                    | 66       | 41         |

|                                      |    |    |
|--------------------------------------|----|----|
| 10 oral                              | 63 | 23 |
| 20 parenteral                        | 62 | 31 |
| 40 topical                           | 62 | 14 |
| 10 oral                              | 61 | 32 |
| 20 parenteral                        | 61 | 31 |
| 0 unspecified route of administrator | 61 | 24 |
| 10 oral                              | 60 | 23 |
| 20 parenteral                        | 58 | 32 |
| 10 oral                              | 57 | 34 |
| 10 oral                              | 57 | 20 |
| 20 parenteral                        | 56 | 38 |
| 45 ophthalmic                        | 56 | 24 |
| 42 inhalation                        | 55 | 12 |
| 20 parenteral                        | 54 | 23 |
| 10 oral                              | 53 | 22 |
| 10 oral                              | 52 | 35 |
| 20 parenteral                        | 51 | 32 |
| 10 oral                              | 51 | 12 |
| 20 parenteral                        | 50 | 29 |
| 40 topical                           | 49 | 33 |
| 10 oral                              | 49 | 20 |
| 10 oral                              | 48 | 28 |
| 20 parenteral                        | 48 | 26 |
| 42 inhalation                        | 48 | 20 |
| 20 parenteral                        | 47 | 35 |
| 20 parenteral                        | 46 | 26 |
| 20 parenteral                        | 45 | 37 |
| 20 parenteral                        | 44 | 27 |
| 20 parenteral                        | 43 | 28 |
| 52 rectal                            | 43 | 25 |
| 20 parenteral                        | 43 | 19 |
| 10 oral                              | 42 | 25 |
| 0 unspecified route of administrator | 42 | 15 |
| 10 oral                              | 41 | 18 |
| 20 parenteral                        | 39 | 26 |
| 20 parenteral                        | 38 | 27 |
| 10 oral                              | 38 | 21 |
| 40 topical                           | 38 | 21 |

|               |    |    |
|---------------|----|----|
| 10 oral       | 38 | 12 |
| 20 parenteral | 37 | 24 |
| 40 topical    | 36 | 22 |
| 10 oral       | 36 | 19 |
| 20 parenteral | 35 | 24 |
| 20 parenteral | 35 | 20 |
| 20 parenteral | 34 | 25 |
| 20 parenteral | 34 | 23 |
| 20 parenteral | 34 | 23 |
| 10 oral       | 34 | 20 |
| 10 oral       | 34 | 16 |
| 10 oral       | 34 | 15 |
| 10 oral       | 34 | 15 |
| 52 rectal     | 33 | 24 |
| 20 parenteral | 33 | 24 |
| 10 oral       | 33 | 16 |
| 10 oral       | 33 | 15 |
| 10 oral       | 32 | 8  |
| 20 parenteral | 30 | 24 |
| 20 parenteral | 30 | 20 |
| 20 parenteral | 29 | 24 |
| 10 oral       | 29 | 13 |
| 10 oral       | 29 | 5  |
| 20 parenteral | 28 | 19 |
| 20 parenteral | 27 | 25 |
| 40 topical    | 27 | 17 |
| 10 oral       | 27 | 16 |
| 40 topical    | 27 | 15 |
| 10 oral       | 27 | 6  |
| 10 oral       | 27 | 5  |
| 20 parenteral | 26 | 19 |
| 10 oral       | 26 | 15 |
| 10 oral       | 26 | 14 |
| 10 oral       | 26 | 9  |
| 20 parenteral | 25 | 21 |
| 20 parenteral | 25 | 21 |
| 20 parenteral | 25 | 20 |
| 10 oral       | 25 | 17 |

|    |                                     |    |    |
|----|-------------------------------------|----|----|
| 20 | parenteral                          | 25 | 13 |
| 20 | parenteral                          | 24 | 20 |
| 20 | parenteral                          | 24 | 19 |
| 40 | topical                             | 24 | 11 |
| 10 | oral                                | 24 | 10 |
| 20 | parenteral                          | 23 | 20 |
| 10 | oral                                | 23 | 19 |
| 20 | parenteral                          | 23 | 14 |
| 40 | topical                             | 23 | 10 |
| 10 | oral                                | 23 | 6  |
| 20 | parenteral                          | 22 | 18 |
| 10 | oral                                | 22 | 17 |
| 10 | oral                                | 22 | 13 |
| 20 | parenteral                          | 22 | 7  |
| 20 | parenteral                          | 21 | 15 |
| 10 | oral                                | 21 | 3  |
| 20 | parenteral                          | 20 | 15 |
| 10 | oral                                | 20 | 13 |
| 42 | inhalation                          | 20 | 5  |
| 20 | parenteral                          | 19 | 17 |
| 20 | parenteral                          | 19 | 17 |
| 10 | oral                                | 19 | 13 |
| 10 | oral                                | 19 | 13 |
| 0  | unspecified route of administration | 19 | 2  |
| 20 | parenteral                          | 18 | 18 |
| 10 | oral                                | 18 | 14 |
| 20 | parenteral                          | 18 | 14 |
| 20 | parenteral                          | 18 | 14 |
| 40 | topical                             | 18 | 13 |
| 22 | intramuscular                       | 18 | 13 |
| 10 | oral                                | 18 | 9  |
| 43 | nasal                               | 17 | 13 |
| 20 | parenteral                          | 17 | 10 |
| 20 | parenteral                          | 17 | 9  |
| 10 | oral                                | 17 | 5  |
| 40 | topical                             | 17 | 3  |
| 10 | oral                                | 16 | 16 |
| 20 | parenteral                          | 16 | 16 |

|    |                                    |    |    |
|----|------------------------------------|----|----|
| 20 | parenteral                         | 16 | 14 |
| 20 | parenteral                         | 16 | 14 |
| 20 | parenteral                         | 16 | 12 |
| 20 | parenteral                         | 16 | 12 |
| 10 | oral                               | 16 | 10 |
| 40 | topical                            | 16 | 9  |
| 10 | oral                               | 16 | 7  |
| 10 | oral                               | 16 | 5  |
| 10 | oral                               | 16 | 5  |
| 20 | parenteral                         | 15 | 14 |
| 20 | parenteral                         | 15 | 12 |
| 40 | topical                            | 15 | 12 |
| 20 | parenteral                         | 15 | 11 |
| 40 | topical                            | 15 | 9  |
| 10 | oral                               | 15 | 8  |
| 10 | oral                               | 15 | 7  |
| 10 | oral                               | 15 | 4  |
| 20 | parenteral                         | 14 | 11 |
| 20 | parenteral                         | 14 | 11 |
| 42 | inhalation                         | 14 | 10 |
| 20 | parenteral                         | 14 | 10 |
| 52 | rectal                             | 14 | 8  |
| 10 | oral                               | 14 | 8  |
| 20 | parenteral                         | 13 | 13 |
| 40 | topical                            | 13 | 11 |
| 10 | oral                               | 13 | 11 |
| 10 | oral                               | 13 | 9  |
| 20 | parenteral                         | 13 | 8  |
| 40 | topical                            | 13 | 8  |
| 10 | oral                               | 13 | 5  |
| 42 | inhalation                         | 13 | 4  |
| 42 | inhalation                         | 13 | 4  |
| 20 | parenteral                         | 13 | 3  |
| 0  | unspecified route of administrator | 13 | 1  |
| 20 | parenteral                         | 12 | 12 |
| 20 | parenteral                         | 12 | 10 |
| 20 | parenteral                         | 12 | 10 |
| 10 | oral                               | 12 | 9  |

|                                      |    |    |
|--------------------------------------|----|----|
| 10 oral                              | 12 | 9  |
| 10 oral                              | 12 | 8  |
| 45 ophthalmic                        | 12 | 7  |
| 20 parenteral                        | 12 | 7  |
| 40 topical                           | 12 | 7  |
| 10 oral                              | 12 | 4  |
| 10 oral                              | 12 | 4  |
| 20 parenteral                        | 11 | 11 |
| 20 parenteral                        | 11 | 11 |
| 10 oral                              | 11 | 10 |
| 20 parenteral                        | 11 | 10 |
| 20 parenteral                        | 11 | 9  |
| 10 oral                              | 11 | 9  |
| 10 oral                              | 11 | 8  |
| 0 unspecified route of administrator | 11 | 7  |
| 10 oral                              | 10 | 9  |
| 20 parenteral                        | 10 | 9  |
| 10 oral                              | 10 | 9  |
| 40 topical                           | 10 | 9  |
| 20 parenteral                        | 10 | 8  |
| 20 parenteral                        | 10 | 8  |
| 10 oral                              | 10 | 8  |
| 20 parenteral                        | 10 | 7  |
| 10 oral                              | 10 | 6  |
| 20 parenteral                        | 10 | 5  |
| 10 oral                              | 10 | 4  |
| 42 inhalation                        | 10 | 1  |
| 20 parenteral                        | 9  | 9  |
| 20 parenteral                        | 9  | 8  |
| 20 parenteral                        | 9  | 7  |
| 20 parenteral                        | 9  | 7  |
| 20 parenteral                        | 9  | 6  |
| 10 oral                              | 9  | 6  |
| 20 parenteral                        | 9  | 5  |
| 20 parenteral                        | 9  | 4  |
| 10 oral                              | 9  | 4  |
| 20 parenteral                        | 9  | 4  |
| 20 parenteral                        | 9  | 4  |

|                  |   |   |
|------------------|---|---|
| 10 oral          | 9 | 4 |
| 10 oral          | 9 | 2 |
| 10 oral          | 8 | 8 |
| 20 parenteral    | 8 | 8 |
| 10 oral          | 8 | 7 |
| 42 inhalation    | 8 | 6 |
| 20 parenteral    | 8 | 6 |
| 10 oral          | 8 | 5 |
| 10 oral          | 8 | 5 |
| 20 parenteral    | 8 | 5 |
| 40 topical       | 8 | 3 |
| 10 oral          | 8 | 3 |
| 10 oral          | 8 | 2 |
| 20 parenteral    | 7 | 7 |
| 40 topical       | 7 | 7 |
| 20 parenteral    | 7 | 7 |
| 20 parenteral    | 7 | 7 |
| 20 parenteral    | 7 | 7 |
| 10 oral          | 7 | 6 |
| 20 parenteral    | 7 | 6 |
| 40 topical       | 7 | 6 |
| 20 parenteral    | 7 | 5 |
| 40 topical       | 7 | 5 |
| 41 transdermal   | 7 | 5 |
| 10 oral          | 7 | 5 |
| 42 inhalation    | 7 | 5 |
| 22 intramuscular | 7 | 5 |
| 20 parenteral    | 7 | 4 |
| 44 otic          | 7 | 4 |
| 23 subcutaneous  | 7 | 4 |
| 40 topical       | 7 | 4 |
| 20 parenteral    | 7 | 3 |
| 20 parenteral    | 7 | 3 |
| 10 oral          | 7 | 2 |
| 10 oral          | 7 | 2 |

|    |                                    |   |   |
|----|------------------------------------|---|---|
| 20 | parenteral                         | 6 | 5 |
| 20 | parenteral                         | 6 | 5 |
| 20 | parenteral                         | 6 | 5 |
| 20 | parenteral                         | 6 | 4 |
| 20 | parenteral                         | 6 | 4 |
| 10 | oral                               | 6 | 4 |
| 40 | topical                            | 6 | 4 |
| 20 | parenteral                         | 6 | 3 |
| 10 | oral                               | 6 | 3 |
| 41 | transdermal                        | 6 | 3 |
| 40 | topical                            | 6 | 3 |
| 10 | oral                               | 6 | 2 |
| 20 | parenteral                         | 6 | 2 |
| 10 | oral                               | 6 | 2 |
| 10 | oral                               | 6 | 1 |
| 10 | oral                               | 6 | 1 |
| 20 | parenteral                         | 5 | 5 |
| 20 | parenteral                         | 5 | 5 |
| 20 | parenteral                         | 5 | 5 |
| 20 | parenteral                         | 5 | 5 |
| 20 | parenteral                         | 5 | 5 |
| 10 | oral                               | 5 | 5 |
| 44 | otic                               | 5 | 5 |
| 22 | intramuscular                      | 5 | 4 |
| 40 | topical                            | 5 | 4 |
| 20 | parenteral                         | 5 | 3 |
| 10 | oral                               | 5 | 3 |
| 45 | ophthalmic                         | 5 | 3 |
| 0  | unspecified route of administrator | 5 | 2 |
| 43 | nasal                              | 5 | 1 |
| 20 | parenteral                         | 4 | 4 |
| 20 | parenteral                         | 4 | 4 |
| 20 | parenteral                         | 4 | 4 |
| 10 | oral                               | 4 | 4 |
| 10 | oral                               | 4 | 4 |
| 40 | topical                            | 4 | 4 |
| 40 | topical                            | 4 | 4 |
| 20 | parenteral                         | 4 | 4 |



|                  |   |   |
|------------------|---|---|
| 43 nasal         | 4 | 4 |
| 45 ophthalmic    | 4 | 4 |
| 10 oral          | 4 | 3 |
| 40 topical       | 4 | 3 |
| 22 intramuscular | 4 | 3 |
| 40 topical       | 4 | 3 |
| 10 oral          | 4 | 3 |
| 10 oral          | 4 | 3 |
| 20 parenteral    | 4 | 3 |
| 40 topical       | 4 | 3 |
| 22 intramuscular | 4 | 3 |
| 10 oral          | 4 | 3 |
| 45 ophthalmic    | 4 | 3 |
| 20 parenteral    | 4 | 2 |
| 50 urogenital    | 4 | 2 |
| 10 oral          | 4 | 2 |
| 10 oral          | 4 | 2 |
| 10 oral          | 4 | 1 |
| 20 parenteral    | 4 | 1 |
| 10 oral          | 4 | 1 |
| 10 oral          | 4 | 1 |
| 20 parenteral    | 3 | 3 |
| 45 ophthalmic    | 3 | 3 |
| 20 parenteral    | 3 | 3 |
| 10 oral          | 3 | 3 |
| 45 ophthalmic    | 3 | 3 |
| 45 ophthalmic    | 3 | 3 |
| 40 topical       | 3 | 3 |
| 43 nasal         | 3 | 3 |
| 20 parenteral    | 3 | 3 |
| 10 oral          | 3 | 3 |
| 20 parenteral    | 3 | 3 |
| 10 oral          | 3 | 3 |
| 52 rectal        | 3 | 3 |
| 10 oral          | 3 | 3 |

|    |                                    |   |   |
|----|------------------------------------|---|---|
| 20 | parenteral                         | 3 | 3 |
| 20 | parenteral                         | 3 | 3 |
| 40 | topical                            | 3 | 3 |
| 20 | parenteral                         | 3 | 3 |
| 20 | parenteral                         | 3 | 3 |
| 20 | parenteral                         | 3 | 3 |
| 20 | parenteral                         | 3 | 3 |
| 20 | parenteral                         | 3 | 3 |
| 20 | parenteral                         | 3 | 3 |
| 20 | parenteral                         | 3 | 3 |
| 40 | topical                            | 3 | 3 |
| 45 | ophthalmic                         | 3 | 3 |
| 45 | ophthalmic                         | 3 | 2 |
| 10 | oral                               | 3 | 2 |
| 20 | parenteral                         | 3 | 2 |
| 20 | parenteral                         | 3 | 2 |
| 45 | ophthalmic                         | 3 | 2 |
| 20 | parenteral                         | 3 | 2 |
| 45 | ophthalmic                         | 3 | 2 |
| 10 | oral                               | 3 | 2 |
| 43 | nasal                              | 3 | 2 |
| 20 | parenteral                         | 3 | 2 |
| 0  | unspecified route of administrator | 3 | 2 |
| 42 | inhalation                         | 3 | 2 |
| 45 | ophthalmic                         | 3 | 2 |
| 10 | oral                               | 3 | 1 |
| 10 | oral                               | 3 | 1 |
| 10 | oral                               | 3 | 1 |
| 10 | oral                               | 3 | 1 |
| 40 | topical                            | 3 | 1 |
| 10 | oral                               | 3 | 1 |
| 20 | parenteral                         | 3 | 1 |
| 20 | parenteral                         | 3 | 1 |
| 20 | parenteral                         | 3 | 1 |
| 42 | inhalation                         | 3 | 1 |
| 20 | parenteral                         | 2 | 2 |
| 52 | rectal                             | 2 | 2 |
| 22 | intramuscular                      | 2 | 2 |
| 10 | oral                               | 2 | 2 |

|    |                                     |   |   |
|----|-------------------------------------|---|---|
| 52 | rectal                              | 2 | 2 |
| 10 | oral                                | 2 | 2 |
| 43 | nasal                               | 2 | 2 |
| 10 | oral                                | 2 | 2 |
| 40 | topical                             | 2 | 2 |
| 20 | parenteral                          | 2 | 2 |
| 20 | parenteral                          | 2 | 2 |
| 20 | parenteral                          | 2 | 2 |
| 45 | ophthalmic                          | 2 | 2 |
| 20 | parenteral                          | 2 | 2 |
| 10 | oral                                | 2 | 2 |
| 43 | nasal                               | 2 | 2 |
| 20 | parenteral                          | 2 | 2 |
| 10 | oral                                | 2 | 2 |
| 10 | oral                                | 2 | 2 |
| 10 | oral                                | 2 | 2 |
| 10 | oral                                | 2 | 2 |
| 52 | rectal                              | 2 | 2 |
| 0  | unspecified route of administration | 2 | 2 |
| 20 | parenteral                          | 2 | 2 |
| 20 | parenteral                          | 2 | 2 |
| 20 | parenteral                          | 2 | 2 |
| 40 | topical                             | 2 | 2 |
| 20 | parenteral                          | 2 | 2 |
| 20 | parenteral                          | 2 | 2 |
| 20 | parenteral                          | 2 | 2 |
| 22 | intramuscular                       | 2 | 2 |
| 22 | intramuscular                       | 2 | 2 |
| 10 | oral                                | 2 | 2 |
| 22 | intramuscular                       | 2 | 2 |
| 50 | urogenital                          | 2 | 2 |
| 42 | inhalation                          | 2 | 2 |
| 42 | inhalation                          | 2 | 2 |
| 10 | oral                                | 2 | 2 |
| 44 | otic                                | 2 | 2 |
| 40 | topical                             | 2 | 2 |
| 10 | oral                                | 2 | 1 |
| 42 | inhalation                          | 2 | 1 |

|                  |   |   |
|------------------|---|---|
| 10 oral          | 2 | 1 |
| 22 intramuscular | 2 | 1 |
| 10 oral          | 2 | 1 |
| 20 parenteral    | 2 | 1 |
| 10 oral          | 2 | 1 |
| 10 oral          | 2 | 1 |
| 20 parenteral    | 2 | 1 |
| 10 oral          | 2 | 1 |
| 10 oral          | 1 | 1 |
| 20 parenteral    | 1 | 1 |
| 10 oral          | 1 | 1 |
| 22 intramuscular | 1 | 1 |
| 10 oral          | 1 | 1 |
| 20 parenteral    | 1 | 1 |
| 45 ophthalmic    | 1 | 1 |
| 20 parenteral    | 1 | 1 |
| 20 parenteral    | 1 | 1 |
| 10 oral          | 1 | 1 |
| 10 oral          | 1 | 1 |
| 10 oral          | 1 | 1 |
| 20 parenteral    | 1 | 1 |
| 10 oral          | 1 | 1 |
| 10 oral          | 1 | 1 |
| 20 parenteral    | 1 | 1 |
| 22 intramuscular | 1 | 1 |
| 10 oral          | 1 | 1 |
| 10 oral          | 1 | 1 |
| 20 parenteral    | 1 | 1 |
| 44 otic          | 1 | 1 |
| 20 parenteral    | 1 | 1 |
| 10 oral          | 1 | 1 |
| 45 ophthalmic    | 1 | 1 |
| 45 ophthalmic    | 1 | 1 |
| 40 topical       | 1 | 1 |
| 40 topical       | 1 | 1 |

|    |                                     |   |   |
|----|-------------------------------------|---|---|
| 40 | topical                             | 1 | 1 |
| 20 | parenteral                          | 1 | 1 |
| 10 | oral                                | 1 | 1 |
| 10 | oral                                | 1 | 1 |
| 18 | sublingual                          | 1 | 1 |
| 20 | parenteral                          | 1 | 1 |
| 10 | oral                                | 1 | 1 |
| 20 | parenteral                          | 1 | 1 |
| 10 | oral                                | 1 | 1 |
| 40 | topical                             | 1 | 1 |
| 40 | topical                             | 1 | 1 |
| 20 | parenteral                          | 1 | 1 |
| 20 | parenteral                          | 1 | 1 |
| 20 | parenteral                          | 1 | 1 |
| 20 | parenteral                          | 1 | 1 |
| 27 | intraperitoneal                     | 1 | 1 |
| 10 | oral                                | 1 | 1 |
| 20 | parenteral                          | 1 | 1 |
| 0  | unspecified route of administration | 1 | 1 |
| 0  | unspecified route of administration | 1 | 1 |
| 0  | unspecified route of administration | 1 | 1 |
| 0  | unspecified route of administration | 1 | 1 |
| 0  | unspecified route of administration | 1 | 1 |
| 0  | unspecified route of administration | 1 | 1 |
| 10 | oral                                | 1 | 1 |
| 40 | topical                             | 1 | 1 |
| 10 | oral                                | 1 | 1 |
| 10 | oral                                | 1 | 1 |
| 10 | oral                                | 1 | 1 |
| 20 | parenteral                          | 1 | 1 |
| 10 | oral                                | 1 | 1 |
| 10 | oral                                | 1 | 1 |
| 10 | oral                                | 1 | 1 |
| 52 | rectal                              | 1 | 1 |
| 10 | oral                                | 1 | 1 |
| 20 | parenteral                          | 1 | 1 |
| 20 | parenteral                          | 1 | 1 |
| 20 | parenteral                          | 1 | 1 |

|    |               |   |   |
|----|---------------|---|---|
| 40 | topical       | 1 | 1 |
| 40 | topical       | 1 | 1 |
| 43 | nasal         | 1 | 1 |
| 43 | nasal         | 1 | 1 |
| 20 | parenteral    | 1 | 1 |
| 23 | subcutaneous  | 1 | 1 |
| 10 | oral          | 1 | 1 |
| 40 | topical       | 1 | 1 |
| 45 | ophthalmic    | 1 | 1 |
| 22 | intramuscular | 1 | 1 |
| 20 | parenteral    | 1 | 1 |
| 23 | subcutaneous  | 1 | 1 |
| 22 | intramuscular | 1 | 1 |
| 22 | intramuscular | 1 | 1 |
| 22 | intramuscular | 1 | 1 |
| 10 | oral          | 1 | 1 |
| 40 | topical       | 1 | 1 |
| 20 | parenteral    | 1 | 1 |
| 20 | parenteral    | 1 | 1 |
| 20 | parenteral    | 1 | 1 |
| 50 | urogenital    | 1 | 1 |
| 20 | parenteral    | 1 | 1 |
| 20 | parenteral    | 1 | 1 |
| 20 | parenteral    | 1 | 1 |
| 20 | parenteral    | 1 | 1 |
| 10 | oral          | 1 | 1 |
| 45 | ophthalmic    | 1 | 1 |
| 10 | oral          | 1 | 1 |
| 10 | oral          | 1 | 1 |
| 20 | parenteral    | 1 | 1 |
| 20 | parenteral    | 1 | 1 |
| 10 | oral          | 1 | 1 |
| 10 | oral          | 1 | 1 |
| 40 | topical       | 1 | 1 |
| 44 | otic          | 1 | 1 |
| 40 | topical       | 1 | 1 |
| 20 | parenteral    | 1 | 1 |
| 40 | topical       | 1 | 1 |

| Supply Category | Supply Category Title            | Supply Item | Supply Item Title                                   |
|-----------------|----------------------------------|-------------|-----------------------------------------------------|
| 20              | Medical supply unspecified       | 200000      | Medical supply unspecified                          |
| 21              | Cardiovascular device and supply | 212121      | Arterial cannula                                    |
| 21              | Cardiovascular device and supply | 212167      | Perfusion circuit                                   |
| 21              | Cardiovascular device and supply | 212215      | Flow sensor for use with centrifugal pump           |
| 21              | Cardiovascular device and supply | 213100      | Angioplasty catheter unspecified                    |
| 21              | Cardiovascular device and supply | 213118      | Peripheral angioplasty balloon catheter             |
| 21              | Cardiovascular device and supply | 213141      | Inflation device                                    |
| 21              | Cardiovascular device and supply | 214112      | Vascular infusion catheter and wire                 |
| 21              | Cardiovascular device and supply | 214127      | Device for temporary vessel occlusion               |
| 21              | Cardiovascular device and supply | 215100      | Electrophysiology catheter and probe                |
| 21              | Cardiovascular device and supply | 215202      | Pacemaker single chamber rate-adaptive              |
| 21              | Cardiovascular device and supply | 215301      | Pacemaker lead                                      |
| 21              | Cardiovascular device and supply | 215367      | Cardiographic monitor                               |
| 22              | Orthopedic device and supply     | 220100      | Tray for orthopedic surgery                         |
| 22              | Orthopedic device and supply     | 221200      | Knee implant unspecified                            |
| 22              | Orthopedic device and supply     | 222100      | Bone allograft unspecified                          |
| 22              | Orthopedic device and supply     | 222111      | Connective tissue graft                             |
| 22              | Orthopedic device and supply     | 222122      | Ilium allograft block                               |
| 22              | Orthopedic device and supply     | 222149      | Other specified bone allograft                      |
| 22              | Orthopedic device and supply     | 222153      | Bone morphogenic proteins                           |
| 22              | Orthopedic device and supply     | 222159      | Other specified substitute material for bone repair |
| 22              | Orthopedic device and supply     | 222200      | Orthopedic support supply unspecified               |
| 22              | Orthopedic device and supply     | 222213      | Rigid cervical collar                               |
| 22              | Orthopedic device and supply     | 222227      | Wrist and hand support                              |
| 22              | Orthopedic device and supply     | 222239      | Other specified upper extremity support supply      |
| 22              | Orthopedic device and supply     | 222244      | Leg splint                                          |
| 22              | Orthopedic device and supply     | 222245      | Knee immobilizer                                    |
| 22              | Orthopedic device and supply     | 222259      | Other specified lower extremity support supply      |
| 22              | Orthopedic device and supply     | 222319      | Other specified traction supply                     |
| 22              | Orthopedic device and supply     | 222362      | Short leg cast                                      |
| 22              | Orthopedic device and supply     | 222371      | Cast boot                                           |
| 22              | Orthopedic device and supply     | 222375      | Cast material and accessories                       |
| 22              | Orthopedic device and supply     | 222599      | Other specified orthopedic support supply           |
| 22              | Orthopedic device and supply     | 222612      | Tibial nail                                         |
| 22              | Orthopedic device and supply     | 222620      | Spinal rod                                          |
| 22              | Orthopedic device and supply     | 222640      | Orthopedic pin                                      |
| 22              | Orthopedic device and supply     | 222659      | Other specified orthopedic plate                    |

|    |                              |        |                                                  |
|----|------------------------------|--------|--------------------------------------------------|
| 22 | Orthopedic device and supply | 222710 | Cortical bone screw                              |
| 22 | Orthopedic device and supply | 222741 | Pedicle screw                                    |
| 22 | Orthopedic device and supply | 222759 | Other specified bone screw                       |
| 22 | Orthopedic device and supply | 222781 | Spinal hook                                      |
| 22 | Orthopedic device and supply | 222785 | Bone anchor                                      |
| 22 | Orthopedic device and supply | 222799 | Other specified internal fixation hardware       |
| 22 | Orthopedic device and supply | 225011 | Bone wax                                         |
| 23 | Rehabilitation supply        | 230000 | Rehabilitation supply unspecified                |
| 23 | Rehabilitation supply        | 231115 | Hearing aid                                      |
| 23 | Rehabilitation supply        | 239999 | Other specified rehabilitation supply            |
| 24 | Surgical supply              | 240000 | Surgical supply unspecified                      |
| 24 | Surgical supply              | 241100 | Implant and implanted prosthesis unspecified     |
| 24 | Surgical supply              | 241163 | Ophthalmic implant accessory                     |
| 24 | Surgical supply              | 241177 | Dental implant and accessory                     |
| 24 | Surgical supply              | 241193 | Dermal fillers                                   |
| 24 | Surgical supply              | 241316 | Cerebrospinal fluid reservoir                    |
| 24 | Surgical supply              | 241319 | Other specified cerebrospinal fluid shunt and ac |
| 24 | Surgical supply              | 242119 | Other specified biopsy needle                    |
| 24 | Surgical supply              | 242129 | Other specified biopsy and cytology supply       |
| 24 | Surgical supply              | 243416 | Dilator                                          |
| 24 | Surgical supply              | 243500 | Drainage supply unspecified                      |
| 24 | Surgical supply              | 243521 | Renal drainage catheter                          |
| 24 | Surgical supply              | 243523 | Stone extractor catheter                         |
| 24 | Surgical supply              | 243531 | Thoracic drainage catheter                       |
| 24 | Surgical supply              | 243533 | Pleural cavity drainage unit                     |
| 24 | Surgical supply              | 243537 | Drainage catheter                                |
| 24 | Surgical supply              | 243538 | Negative wound pressure treatment system         |
| 24 | Surgical supply              | 243541 | Closed wound drainage system                     |
| 24 | Surgical supply              | 243545 | Autotransfusion and blood collection equipment   |
| 24 | Surgical supply              | 243551 | ENT ventilation tube                             |
| 24 | Surgical supply              | 243553 | Surgical suction instrument and tubing           |
| 24 | Surgical supply              | 243555 | Yankauer suction supply                          |
| 24 | Surgical supply              | 243557 | Respiratory suction catheter                     |
| 24 | Surgical supply              | 243561 | Suction canister                                 |
| 24 | Surgical supply              | 243563 | Aspirator suction unit                           |
| 24 | Surgical supply              | 243567 | Stomach tube for suction and drainage            |
| 24 | Surgical supply              | 243573 | Accessory for stomach drainage tube              |
| 24 | Surgical supply              | 243599 | Other specified drainage supply                  |



|    |                 |        |                                                 |
|----|-----------------|--------|-------------------------------------------------|
| 24 | Surgical supply | 244101 | Imaging catheter for aortography and ventriculo |
| 24 | Surgical supply | 244105 | Vascular angiographic catheter                  |
| 24 | Surgical supply | 244111 | Vascular guidewire                              |
| 24 | Surgical supply | 244114 | Nonvascular guidewire                           |
| 24 | Surgical supply | 244115 | Catheter introducer                             |
| 24 | Surgical supply | 244117 | Angiography needle                              |
| 24 | Surgical supply | 244118 | Angiography accessory                           |
| 24 | Surgical supply | 244125 | Cholangiography catheter                        |
| 24 | Surgical supply | 244141 | Noncoronary ultrasound imaging catheter and p   |
| 24 | Surgical supply | 244199 | Other specified diagnostic imaging catheter and |
| 24 | Surgical supply | 244233 | Gastroscope                                     |
| 24 | Surgical supply | 244234 | Endoscopy capsule                               |
| 24 | Surgical supply | 244251 | Insufflator and tubing                          |
| 24 | Surgical supply | 244253 | Insufflation needle                             |
| 24 | Surgical supply | 244299 | Other specified endoscope and supply            |
| 24 | Surgical supply | 244510 | Percutaneous venous access device unspecifie    |
| 24 | Surgical supply | 244511 | Single lumen percutaneous venous access devi    |
| 24 | Surgical supply | 244512 | Double lumen percutaneous venous access dev     |
| 24 | Surgical supply | 244513 | Triple lumen percutaneous venous access devic   |
| 24 | Surgical supply | 244521 | Percutaneous peritoneal vascular access device  |
| 24 | Surgical supply | 244530 | Implanted venous access device unspecified      |
| 24 | Surgical supply | 244531 | Single lumen implanted venous access device     |
| 24 | Surgical supply | 244532 | Double lumen implanted venous access device     |
| 24 | Surgical supply | 244711 | Gastrostomy feeding tube                        |
| 24 | Surgical supply | 244713 | Gastrojejunostomy feeding tube                  |
| 24 | Surgical supply | 245100 | Blades                                          |
| 24 | Surgical supply | 245115 | Power unit for drill and drill accessories      |
| 24 | Surgical supply | 245143 | Accessory for ultrasonic surgical unit          |
| 24 | Surgical supply | 245144 | Scissors                                        |
| 24 | Surgical supply | 245145 | Forceps                                         |
| 24 | Surgical supply | 245155 | Surgical clamp and clip                         |
| 24 | Surgical supply | 245161 | Surgical instrument sets and trays              |
| 24 | Surgical supply | 245163 | Surgical drape                                  |
| 24 | Surgical supply | 245165 | Grounding pad                                   |
| 24 | Surgical supply | 245199 | Other specified surgical tool                   |
| 24 | Surgical supply | 246011 | Surgical sponge                                 |
| 24 | Surgical supply | 246015 | Surgical scrub tray                             |
| 24 | Surgical supply | 246031 | Surgical irrigation pump                        |

|    |                                  |        |                                                 |
|----|----------------------------------|--------|-------------------------------------------------|
| 24 | Surgical supply                  | 246035 | Surgical irrigation tubing and accessory        |
| 24 | Surgical supply                  | 246041 | Airborne scavenging unit filter and supply      |
| 24 | Surgical supply                  | 246045 | Endoscope cleaner and supply                    |
| 24 | Surgical supply                  | 246051 | Suture and suture supply                        |
| 24 | Surgical supply                  | 246055 | Surgical staple and stapler                     |
| 24 | Surgical supply                  | 246061 | Cautery unit and accessory                      |
| 24 | Surgical supply                  | 246065 | Anesthesia supply                               |
| 24 | Surgical supply                  | 246081 | Cannula                                         |
| 24 | Surgical supply                  | 246085 | Trocar                                          |
| 24 | Surgical supply                  | 246111 | Esophageal stethoscope                          |
| 24 | Surgical supply                  | 246131 | Surgical light source                           |
| 24 | Surgical supply                  | 249999 | Other specified surgical supply                 |
| 25 | Nursing and other medical supply | 251111 | Decubitus and trauma bed                        |
| 25 | Nursing and other medical supply | 251112 | Wound and decubitus prophylaxis supply          |
| 25 | Nursing and other medical supply | 251114 | Sequential compression device                   |
| 25 | Nursing and other medical supply | 251115 | Compression sleeves for sequential compressio   |
| 25 | Nursing and other medical supply | 252111 | Belts and restraints                            |
| 25 | Nursing and other medical supply | 252116 | Accessory for patient positioning               |
| 25 | Nursing and other medical supply | 253111 | Foley catheter                                  |
| 25 | Nursing and other medical supply | 253112 | Suprapubic catheter                             |
| 25 | Nursing and other medical supply | 253113 | Straight urinary catheter                       |
| 25 | Nursing and other medical supply | 253116 | Urinary catheter bag                            |
| 25 | Nursing and other medical supply | 253117 | Urine leg bag                                   |
| 25 | Nursing and other medical supply | 253118 | Urinary catheter accessory                      |
| 25 | Nursing and other medical supply | 253503 | Urine specimen container                        |
| 25 | Nursing and other medical supply | 253511 | Arterial blood gases (ABG) collection supply    |
| 25 | Nursing and other medical supply | 253514 | Lancets                                         |
| 25 | Nursing and other medical supply | 253519 | Blood collection supply                         |
| 25 | Nursing and other medical supply | 253520 | Cerebrospinal fluid (CSF) specimen collection s |
| 25 | Nursing and other medical supply | 253531 | Specimen trap                                   |
| 25 | Nursing and other medical supply | 253599 | Other specified specimen collection supply      |
| 25 | Nursing and other medical supply | 253601 | Admission kit                                   |
| 25 | Nursing and other medical supply | 253605 | Personal hygiene supply                         |
| 25 | Nursing and other medical supply | 253611 | Breast pump                                     |
| 25 | Nursing and other medical supply | 253615 | Nipple and bottle                               |
| 25 | Nursing and other medical supply | 253621 | Infant supply                                   |
| 25 | Nursing and other medical supply | 253632 | Incontinence pad                                |
| 25 | Nursing and other medical supply | 253641 | Patient clothing                                |

|    |                                  |        |                                             |
|----|----------------------------------|--------|---------------------------------------------|
| 25 | Nursing and other medical supply | 253699 | Other specified cleaning and comfort supply |
| 25 | Nursing and other medical supply | 254000 | Wound dressing unspecified                  |
| 25 | Nursing and other medical supply | 254011 | Antiseptic wound dressing                   |
| 25 | Nursing and other medical supply | 254013 | Impregnated nonadherent dressing            |
| 25 | Nursing and other medical supply | 254015 | Hydrogel dressing                           |
| 25 | Nursing and other medical supply | 254017 | Hydrocolloid dressing                       |
| 25 | Nursing and other medical supply | 254021 | Exudate absorbent dressing                  |
| 25 | Nursing and other medical supply | 254035 | Plain dressing pad and sponge               |
| 25 | Nursing and other medical supply | 254041 | Drain dressing                              |
| 25 | Nursing and other medical supply | 254043 | Elastic bandage roll nonadhesive            |
| 25 | Nursing and other medical supply | 254045 | Nonadherent dressing                        |
| 25 | Nursing and other medical supply | 254047 | Transparent dressing                        |
| 25 | Nursing and other medical supply | 254053 | Eyepad                                      |
| 25 | Nursing and other medical supply | 254055 | Polyurethane foam dressing                  |
| 25 | Nursing and other medical supply | 254057 | Dressing retainer                           |
| 25 | Nursing and other medical supply | 254061 | Adhesive tape                               |
| 25 | Nursing and other medical supply | 254063 | Adhesive dressing with tape                 |
| 25 | Nursing and other medical supply | 254071 | Surgical glue and adhesives                 |
| 25 | Nursing and other medical supply | 254099 | Other specified wound dressing              |
| 25 | Nursing and other medical supply | 254211 | Wound irrigation kit                        |
| 25 | Nursing and other medical supply | 254213 | Sterile irrigation aspiration syringe       |
| 25 | Nursing and other medical supply | 254215 | Suture and staple removal kit               |
| 25 | Nursing and other medical supply | 254515 | Ostomy adhesive                             |
| 25 | Nursing and other medical supply | 254529 | Other specified stoma supply                |
| 25 | Nursing and other medical supply | 254601 | Glove unsterile                             |
| 25 | Nursing and other medical supply | 254605 | Sterile glove                               |
| 25 | Nursing and other medical supply | 254607 | Gown unsterile                              |
| 25 | Nursing and other medical supply | 254611 | Sterile gown                                |
| 25 | Nursing and other medical supply | 254615 | Mask                                        |
| 25 | Nursing and other medical supply | 255100 | Needle unspecified                          |
| 25 | Nursing and other medical supply | 255112 | Butterfly needle                            |
| 25 | Nursing and other medical supply | 255113 | Spinal needle                               |
| 25 | Nursing and other medical supply | 255114 | Noncoring needle                            |
| 25 | Nursing and other medical supply | 255117 | Intraosseous needle                         |
| 25 | Nursing and other medical supply | 255119 | Other specified needle                      |
| 25 | Nursing and other medical supply | 255129 | Other specified syringe                     |
| 25 | Nursing and other medical supply | 255130 | Central line catheter unspecified           |
| 25 | Nursing and other medical supply | 255131 | Single lumen central line catheter          |

|    |                                  |        |                                          |
|----|----------------------------------|--------|------------------------------------------|
| 25 | Nursing and other medical supply | 255132 | Double lumen central line catheter       |
| 25 | Nursing and other medical supply | 255133 | Triple lumen central line catheter       |
| 25 | Nursing and other medical supply | 255134 | Umbilical catheter                       |
| 25 | Nursing and other medical supply | 255135 | PICC single lumen                        |
| 25 | Nursing and other medical supply | 255136 | PICC multiple lumen                      |
| 25 | Nursing and other medical supply | 255139 | Other specified central line catheter    |
| 25 | Nursing and other medical supply | 255141 | IV needle and catheter                   |
| 25 | Nursing and other medical supply | 255146 | IV dressing change and catheter care     |
| 25 | Nursing and other medical supply | 255150 | IV administration set                    |
| 25 | Nursing and other medical supply | 255157 | PCA pump set                             |
| 25 | Nursing and other medical supply | 255161 | Blood administration set                 |
| 25 | Nursing and other medical supply | 255171 | IV extension tubing                      |
| 25 | Nursing and other medical supply | 255173 | Stopcock                                 |
| 25 | Nursing and other medical supply | 255178 | IV filter                                |
| 25 | Nursing and other medical supply | 255179 | IV administration accessories            |
| 25 | Nursing and other medical supply | 255182 | IV fluid transfer supply and equipment   |
| 25 | Nursing and other medical supply | 255199 | Other specified IV supply                |
| 25 | Nursing and other medical supply | 255210 | Infusion pump unspecified                |
| 25 | Nursing and other medical supply | 255212 | Patient controlled infusion pump         |
| 25 | Nursing and other medical supply | 255219 | Other specified infusion pump            |
| 25 | Nursing and other medical supply | 255221 | Feeding tube and accessory               |
| 25 | Nursing and other medical supply | 255310 | Oxygen administration supply unspecified |
| 25 | Nursing and other medical supply | 255311 | Nasal cannula                            |
| 25 | Nursing and other medical supply | 255312 | Respiratory mask                         |
| 25 | Nursing and other medical supply | 255313 | Oxygen mask                              |
| 25 | Nursing and other medical supply | 255314 | High flow nasal cannula                  |
| 25 | Nursing and other medical supply | 255316 | Resuscitation and AMBU mask              |
| 25 | Nursing and other medical supply | 255318 | Intubation equipment                     |
| 25 | Nursing and other medical supply | 255321 | Airway tube                              |
| 25 | Nursing and other medical supply | 255339 | Endotracheal tube                        |
| 25 | Nursing and other medical supply | 255349 | Tracheostomy tube and accessories        |
| 25 | Nursing and other medical supply | 255360 | Respiratory tubing supply                |
| 25 | Nursing and other medical supply | 255362 | Bite block                               |
| 25 | Nursing and other medical supply | 255371 | Resuscitation and AMBU bag               |
| 25 | Nursing and other medical supply | 255372 | Ventilator circuit                       |
| 25 | Nursing and other medical supply | 255375 | CPAP circuit and supply                  |
| 25 | Nursing and other medical supply | 255379 | Ventilator supplies                      |
| 25 | Nursing and other medical supply | 255381 | Nebulizer                                |

|    |                                  |        |                                             |
|----|----------------------------------|--------|---------------------------------------------|
| 25 | Nursing and other medical supply | 255382 | IPPB supply                                 |
| 25 | Nursing and other medical supply | 255383 | Bacteria filter                             |
| 25 | Nursing and other medical supply | 255385 | Incentive spirometer                        |
| 25 | Nursing and other medical supply | 255387 | Percussion supply                           |
| 25 | Nursing and other medical supply | 255388 | Vaporizer and humidifier                    |
| 25 | Nursing and other medical supply | 255399 | Other specified respiratory therapy supply  |
| 25 | Nursing and other medical supply | 255501 | Manometer                                   |
| 25 | Nursing and other medical supply | 255511 | Arterial line                               |
| 25 | Nursing and other medical supply | 255515 | Oximeter                                    |
| 25 | Nursing and other medical supply | 255525 | Transducer                                  |
| 25 | Nursing and other medical supply | 255531 | Blood pressure cuff                         |
| 25 | Nursing and other medical supply | 255551 | Intracranial pressure monitor supply        |
| 25 | Nursing and other medical supply | 255559 | Other specified pressure measurement supply |
| 25 | Nursing and other medical supply | 256011 | Dialysis supply and equipment               |
| 25 | Nursing and other medical supply | 256013 | Tourniquet and accessories                  |
| 25 | Nursing and other medical supply | 256029 | Other specified tray                        |
| 25 | Nursing and other medical supply | 256030 | Linen                                       |
| 25 | Nursing and other medical supply | 256041 | Laboratory and diagnostic testing supply    |
| 25 | Nursing and other medical supply | 256045 | Hypo/hyperthermia machine and accessory     |
| 25 | Nursing and other medical supply | 256060 | Temperature monitor                         |
| 25 | Nursing and other medical supply | 256061 | Thermometer                                 |
| 25 | Nursing and other medical supply | 256062 | Hot and cold packs                          |
| 25 | Nursing and other medical supply | 256071 | Video and camera equipment                  |
| 25 | Nursing and other medical supply | 256075 | Electrodes                                  |
| 25 | Nursing and other medical supply | 259999 | Other specified medical supply              |



|    |    |
|----|----|
| 1  | 1  |
| 1  | 1  |
| 5  | 3  |
| 1  | 1  |
| 2  | 2  |
| 2  | 2  |
| 1  | 1  |
| 2  | 1  |
| 3  | 1  |
| 2  | 2  |
| 12 | 11 |
| 17 | 17 |
| 1  | 1  |
| 5  | 4  |
| 1  | 1  |
| 1  | 1  |
| 3  | 3  |
| 5  | 4  |
| 2  | 1  |
| 6  | 6  |
| 4  | 2  |
| 1  | 1  |
| 1  | 1  |
| 1  | 1  |
| 1  | 1  |
| 4  | 4  |
| 1  | 1  |
| 1  | 1  |
| 3  | 3  |
| 3  | 2  |
| 29 | 7  |
| 25 | 6  |
| 61 | 18 |
| 35 | 8  |
| 21 | 2  |
| 13 | 7  |
| 2  | 2  |
| 4  | 3  |

|    |    |
|----|----|
| 1  | 1  |
| 9  | 6  |
| 44 | 21 |
| 8  | 4  |
| 20 | 18 |
| 1  | 1  |
| 5  | 5  |
| 1  | 1  |
| 1  | 1  |
| 1  | 1  |
| 1  | 1  |
| 2  | 1  |
| 16 | 7  |
| 5  | 5  |
| 7  | 6  |
| 1  | 1  |
| 5  | 4  |
| 1  | 1  |
| 1  | 1  |
| 1  | 1  |
| 2  | 2  |
| 2  | 1  |
| 1  | 1  |
| 41 | 24 |
| 37 | 20 |
| 8  | 7  |
| 6  | 6  |
| 3  | 3  |
| 27 | 8  |
| 12 | 3  |
| 5  | 5  |
| 61 | 37 |
| 20 | 7  |
| 2  | 2  |
| 17 | 8  |
| 3  | 2  |
| 1  | 1  |
| 2  | 2  |



|    |    |
|----|----|
| 7  | 4  |
| 1  | 1  |
| 2  | 2  |
| 22 | 17 |
| 2  | 2  |
| 4  | 4  |
| 17 | 6  |
| 1  | 1  |
| 13 | 13 |
| 1  | 1  |
| 2  | 2  |
| 14 | 6  |
| 1  | 1  |
| 18 | 8  |
| 2  | 2  |
| 7  | 5  |
| 22 | 9  |
| 39 | 14 |
| 9  | 7  |
| 1  | 1  |
| 23 | 14 |
| 9  | 7  |
| 1  | 1  |
| 28 | 7  |
| 2  | 2  |
| 1  | 1  |
| 2  | 2  |
| 1  | 1  |
| 10 | 10 |
| 15 | 6  |
| 17 | 4  |
| 26 | 3  |
| 27 | 6  |
| 3  | 2  |
| 2  | 2  |
| 1  | 1  |
| 1  | 1  |
| 1  | 1  |

|    |    |
|----|----|
| 27 | 7  |
| 2  | 2  |
| 3  | 3  |
| 4  | 4  |
| 5  | 1  |
| 6  | 5  |
| 7  | 2  |
| 16 | 6  |
| 1  | 1  |
| 1  | 1  |
| 1  | 1  |
| 36 | 13 |
| 1  | 1  |
| 30 | 11 |
| 1  | 1  |
| 16 | 10 |
| 4  | 2  |
| 19 | 14 |
| 14 | 7  |
| 2  | 1  |
| 26 | 6  |
| 10 | 5  |
| 5  | 3  |
| 19 | 7  |
| 1  | 1  |
| 18 | 3  |
| 1  | 1  |
| 4  | 3  |
| 6  | 5  |
| 4  | 4  |
| 20 | 5  |
| 6  | 6  |
| 1  | 1  |
| 1  | 1  |
| 2  | 2  |
| 6  | 6  |
| 22 | 19 |
| 6  | 6  |

|    |    |
|----|----|
| 10 | 8  |
| 5  | 4  |
| 1  | 1  |
| 11 | 11 |
| 6  | 5  |
| 2  | 1  |
| 47 | 10 |
| 27 | 11 |
| 20 | 8  |
| 1  | 1  |
| 9  | 4  |
| 24 | 9  |
| 8  | 3  |
| 4  | 3  |
| 35 | 6  |
| 10 | 3  |
| 31 | 6  |
| 13 | 4  |
| 2  | 1  |
| 50 | 8  |
| 99 | 25 |
| 9  | 2  |
| 30 | 10 |
| 16 | 6  |
| 14 | 5  |
| 3  | 3  |
| 37 | 8  |
| 2  | 2  |
| 5  | 3  |
| 7  | 5  |
| 22 | 7  |
| 8  | 3  |
| 3  | 2  |
| 31 | 13 |
| 22 | 6  |
| 23 | 8  |
| 12 | 2  |
| 52 | 12 |

|     |    |
|-----|----|
| 1   | 1  |
| 1   | 1  |
| 1   | 1  |
| 31  | 7  |
| 24  | 6  |
| 15  | 6  |
| 3   | 1  |
| 3   | 3  |
| 150 | 34 |
| 8   | 5  |
| 46  | 7  |
| 1   | 1  |
| 18  | 7  |
| 2   | 2  |
| 9   | 4  |
| 1   | 1  |
| 7   | 3  |
| 4   | 3  |
| 25  | 16 |
| 23  | 5  |
| 2   | 2  |
| 11  | 5  |
| 1   | 1  |
| 51  | 13 |
| 62  | 16 |

| Lab Area | Lab Area Title | Test Category | Test Category Title        | Lab Test |
|----------|----------------|---------------|----------------------------|----------|
| 30       | Laboratory     | 300           | Laboratory unspecified     | 300000   |
| 30       | Laboratory     | 300           | Laboratory unspecified     | 300140   |
| 30       | Laboratory     | 300           | Laboratory unspecified     | 300199   |
| 30       | Laboratory     | 300           | Laboratory unspecified     | 300300   |
| 30       | Laboratory     | 300           | Laboratory unspecified     | 300999   |
| 31       | Chemistry      | 310           | Chemistry unspecified      | 310000   |
| 31       | Chemistry      | 310           | Chemistry unspecified      | 310108   |
| 31       | Chemistry      | 310           | Chemistry unspecified      | 310114   |
| 31       | Chemistry      | 310           | Chemistry unspecified      | 310300   |
| 31       | Chemistry      | 310           | Chemistry unspecified      | 310400   |
| 31       | Chemistry      | 311           | Acid base test/electrolyte | 311100   |
| 31       | Chemistry      | 311           | Acid base test/electrolyte | 311120   |
| 31       | Chemistry      | 311           | Acid base test/electrolyte | 311140   |
| 31       | Chemistry      | 311           | Acid base test/electrolyte | 311150   |
| 31       | Chemistry      | 311           | Acid base test/electrolyte | 311210   |
| 31       | Chemistry      | 311           | Acid base test/electrolyte | 311211   |
| 31       | Chemistry      | 311           | Acid base test/electrolyte | 311220   |
| 31       | Chemistry      | 311           | Acid base test/electrolyte | 311230   |
| 31       | Chemistry      | 311           | Acid base test/electrolyte | 311240   |
| 31       | Chemistry      | 311           | Acid base test/electrolyte | 311241   |
| 31       | Chemistry      | 311           | Acid base test/electrolyte | 311250   |
| 31       | Chemistry      | 311           | Acid base test/electrolyte | 311260   |
| 31       | Chemistry      | 311           | Acid base test/electrolyte | 311280   |
| 31       | Chemistry      | 311           | Acid base test/electrolyte | 311290   |
| 31       | Chemistry      | 311           | Acid base test/electrolyte | 311291   |
| 31       | Chemistry      | 311           | Acid base test/electrolyte | 311297   |
| 31       | Chemistry      | 311           | Acid base test/electrolyte | 311399   |
| 31       | Chemistry      | 312           | Amino acid/peptide         | 312000   |
| 31       | Chemistry      | 312           | Amino acid/peptide         | 312050   |
| 31       | Chemistry      | 312           | Amino acid/peptide         | 312110   |
| 31       | Chemistry      | 312           | Amino acid/peptide         | 312120   |
| 31       | Chemistry      | 312           | Amino acid/peptide         | 312123   |
| 31       | Chemistry      | 312           | Amino acid/peptide         | 312200   |
| 31       | Chemistry      | 312           | Amino acid/peptide         | 312202   |
| 31       | Chemistry      | 312           | Amino acid/peptide         | 312499   |
| 31       | Chemistry      | 313           | Carbohydrate/metabolite    | 313000   |
| 31       | Chemistry      | 313           | Carbohydrate/metabolite    | 313080   |

|    |           |     |                             |        |
|----|-----------|-----|-----------------------------|--------|
| 31 | Chemistry | 313 | Carbohydrate/metabolite     | 313100 |
| 31 | Chemistry | 313 | Carbohydrate/metabolite     | 313110 |
| 31 | Chemistry | 313 | Carbohydrate/metabolite     | 313200 |
| 31 | Chemistry | 313 | Carbohydrate/metabolite     | 313300 |
| 31 | Chemistry | 313 | Carbohydrate/metabolite     | 313310 |
| 31 | Chemistry | 313 | Carbohydrate/metabolite     | 313400 |
| 31 | Chemistry | 313 | Carbohydrate/metabolite     | 313500 |
| 31 | Chemistry | 313 | Carbohydrate/metabolite     | 313999 |
| 31 | Chemistry | 314 | Therapeutic drug monitoring | 314000 |
| 31 | Chemistry | 314 | Therapeutic drug monitoring | 314102 |
| 31 | Chemistry | 314 | Therapeutic drug monitoring | 314103 |
| 31 | Chemistry | 314 | Therapeutic drug monitoring | 314105 |
| 31 | Chemistry | 314 | Therapeutic drug monitoring | 314107 |
| 31 | Chemistry | 314 | Therapeutic drug monitoring | 314130 |
| 31 | Chemistry | 314 | Therapeutic drug monitoring | 314306 |
| 31 | Chemistry | 314 | Therapeutic drug monitoring | 314420 |
| 31 | Chemistry | 314 | Therapeutic drug monitoring | 314422 |
| 31 | Chemistry | 314 | Therapeutic drug monitoring | 314424 |
| 31 | Chemistry | 314 | Therapeutic drug monitoring | 314425 |
| 31 | Chemistry | 314 | Therapeutic drug monitoring | 314427 |
| 31 | Chemistry | 314 | Therapeutic drug monitoring | 314428 |
| 31 | Chemistry | 314 | Therapeutic drug monitoring | 314429 |
| 31 | Chemistry | 314 | Therapeutic drug monitoring | 314459 |
| 31 | Chemistry | 314 | Therapeutic drug monitoring | 314521 |
| 31 | Chemistry | 314 | Therapeutic drug monitoring | 314529 |
| 31 | Chemistry | 314 | Therapeutic drug monitoring | 314590 |
| 31 | Chemistry | 314 | Therapeutic drug monitoring | 314599 |
| 31 | Chemistry | 314 | Therapeutic drug monitoring | 314600 |
| 31 | Chemistry | 314 | Therapeutic drug monitoring | 314618 |
| 31 | Chemistry | 314 | Therapeutic drug monitoring | 314622 |
| 31 | Chemistry | 314 | Therapeutic drug monitoring | 314711 |
| 31 | Chemistry | 314 | Therapeutic drug monitoring | 314714 |
| 31 | Chemistry | 314 | Therapeutic drug monitoring | 314720 |
| 31 | Chemistry | 314 | Therapeutic drug monitoring | 314730 |
| 31 | Chemistry | 314 | Therapeutic drug monitoring | 314760 |
| 31 | Chemistry | 314 | Therapeutic drug monitoring | 314770 |
| 31 | Chemistry | 314 | Therapeutic drug monitoring | 314810 |
| 31 | Chemistry | 314 | Therapeutic drug monitoring | 314830 |

|    |           |     |                             |        |
|----|-----------|-----|-----------------------------|--------|
| 31 | Chemistry | 314 | Therapeutic drug monitoring | 314840 |
| 31 | Chemistry | 314 | Therapeutic drug monitoring | 314850 |
| 31 | Chemistry | 314 | Therapeutic drug monitoring | 314870 |
| 31 | Chemistry | 314 | Therapeutic drug monitoring | 314895 |
| 31 | Chemistry | 314 | Therapeutic drug monitoring | 314899 |
| 31 | Chemistry | 314 | Therapeutic drug monitoring | 314901 |
| 31 | Chemistry | 314 | Therapeutic drug monitoring | 314903 |
| 31 | Chemistry | 314 | Therapeutic drug monitoring | 314907 |
| 31 | Chemistry | 314 | Therapeutic drug monitoring | 314908 |
| 31 | Chemistry | 314 | Therapeutic drug monitoring | 314912 |
| 31 | Chemistry | 314 | Therapeutic drug monitoring | 314914 |
| 31 | Chemistry | 314 | Therapeutic drug monitoring | 314915 |
| 31 | Chemistry | 314 | Therapeutic drug monitoring | 314916 |
| 31 | Chemistry | 314 | Therapeutic drug monitoring | 314939 |
| 31 | Chemistry | 315 | Enzyme and isoenzyme        | 315000 |
| 31 | Chemistry | 315 | Enzyme and isoenzyme        | 315020 |
| 31 | Chemistry | 315 | Enzyme and isoenzyme        | 315030 |
| 31 | Chemistry | 315 | Enzyme and isoenzyme        | 315040 |
| 31 | Chemistry | 315 | Enzyme and isoenzyme        | 315042 |
| 31 | Chemistry | 315 | Enzyme and isoenzyme        | 315050 |
| 31 | Chemistry | 315 | Enzyme and isoenzyme        | 315060 |
| 31 | Chemistry | 315 | Enzyme and isoenzyme        | 315068 |
| 31 | Chemistry | 315 | Enzyme and isoenzyme        | 315080 |
| 31 | Chemistry | 315 | Enzyme and isoenzyme        | 315081 |
| 31 | Chemistry | 315 | Enzyme and isoenzyme        | 315090 |
| 31 | Chemistry | 315 | Enzyme and isoenzyme        | 315092 |
| 31 | Chemistry | 315 | Enzyme and isoenzyme        | 315100 |
| 31 | Chemistry | 315 | Enzyme and isoenzyme        | 315110 |
| 31 | Chemistry | 315 | Enzyme and isoenzyme        | 315125 |
| 31 | Chemistry | 315 | Enzyme and isoenzyme        | 315130 |
| 31 | Chemistry | 315 | Enzyme and isoenzyme        | 315160 |
| 31 | Chemistry | 315 | Enzyme and isoenzyme        | 315299 |
| 31 | Chemistry | 316 | Hormone                     | 316000 |
| 31 | Chemistry | 316 | Hormone                     | 316110 |
| 31 | Chemistry | 316 | Hormone                     | 316120 |
| 31 | Chemistry | 316 | Hormone                     | 316130 |
| 31 | Chemistry | 316 | Hormone                     | 316135 |
| 31 | Chemistry | 316 | Hormone                     | 316136 |

|    |           |     |                            |        |
|----|-----------|-----|----------------------------|--------|
| 31 | Chemistry | 316 | Hormone                    | 316140 |
| 31 | Chemistry | 316 | Hormone                    | 316160 |
| 31 | Chemistry | 316 | Hormone                    | 316210 |
| 31 | Chemistry | 316 | Hormone                    | 316220 |
| 31 | Chemistry | 316 | Hormone                    | 316230 |
| 31 | Chemistry | 316 | Hormone                    | 316231 |
| 31 | Chemistry | 316 | Hormone                    | 316251 |
| 31 | Chemistry | 316 | Hormone                    | 316299 |
| 31 | Chemistry | 316 | Hormone                    | 316350 |
| 31 | Chemistry | 316 | Hormone                    | 316399 |
| 31 | Chemistry | 316 | Hormone                    | 316410 |
| 31 | Chemistry | 316 | Hormone                    | 316420 |
| 31 | Chemistry | 316 | Hormone                    | 316510 |
| 31 | Chemistry | 316 | Hormone                    | 316520 |
| 31 | Chemistry | 316 | Hormone                    | 316530 |
| 31 | Chemistry | 316 | Hormone                    | 316550 |
| 31 | Chemistry | 316 | Hormone                    | 316640 |
| 31 | Chemistry | 316 | Hormone                    | 316650 |
| 31 | Chemistry | 316 | Hormone                    | 316670 |
| 31 | Chemistry | 316 | Hormone                    | 316699 |
| 31 | Chemistry | 316 | Hormone                    | 316920 |
| 31 | Chemistry | 316 | Hormone                    | 316950 |
| 31 | Chemistry | 316 | Hormone                    | 316970 |
| 31 | Chemistry | 317 | Lipid                      | 317000 |
| 31 | Chemistry | 317 | Lipid                      | 317025 |
| 31 | Chemistry | 317 | Lipid                      | 317041 |
| 31 | Chemistry | 317 | Lipid                      | 317045 |
| 31 | Chemistry | 317 | Lipid                      | 317051 |
| 31 | Chemistry | 317 | Lipid                      | 317055 |
| 31 | Chemistry | 317 | Lipid                      | 317075 |
| 31 | Chemistry | 317 | Lipid                      | 317110 |
| 31 | Chemistry | 317 | Lipid                      | 317199 |
| 31 | Chemistry | 318 | Nonprotein nitrogenous com | 318101 |
| 31 | Chemistry | 318 | Nonprotein nitrogenous com | 318111 |
| 31 | Chemistry | 318 | Nonprotein nitrogenous com | 318115 |
| 31 | Chemistry | 318 | Nonprotein nitrogenous com | 318121 |
| 31 | Chemistry | 318 | Nonprotein nitrogenous com | 318125 |
| 31 | Chemistry | 318 | Nonprotein nitrogenous com | 318131 |



|    |                |     |                            |        |
|----|----------------|-----|----------------------------|--------|
| 31 | Chemistry      | 318 | Nonprotein nitrogenous com | 318135 |
| 31 | Chemistry      | 318 | Nonprotein nitrogenous com | 318145 |
| 31 | Chemistry      | 318 | Nonprotein nitrogenous com | 318151 |
| 31 | Chemistry      | 318 | Nonprotein nitrogenous com | 318155 |
| 31 | Chemistry      | 318 | Nonprotein nitrogenous com | 318301 |
| 31 | Chemistry      | 318 | Nonprotein nitrogenous com | 318303 |
| 31 | Chemistry      | 318 | Nonprotein nitrogenous com | 318304 |
| 31 | Chemistry      | 318 | Nonprotein nitrogenous com | 318311 |
| 31 | Chemistry      | 318 | Nonprotein nitrogenous com | 318321 |
| 31 | Chemistry      | 318 | Nonprotein nitrogenous com | 318325 |
| 31 | Chemistry      | 318 | Nonprotein nitrogenous com | 318331 |
| 31 | Chemistry      | 318 | Nonprotein nitrogenous com | 318335 |
| 31 | Chemistry      | 318 | Nonprotein nitrogenous com | 318345 |
| 31 | Chemistry      | 318 | Nonprotein nitrogenous com | 318351 |
| 31 | Chemistry      | 318 | Nonprotein nitrogenous com | 318375 |
| 32 | Hematology and | 321 | Hematology cells and sedim | 321090 |
| 32 | Hematology and | 321 | Hematology cells and sedim | 321100 |
| 32 | Hematology and | 321 | Hematology cells and sedim | 321110 |
| 32 | Hematology and | 321 | Hematology cells and sedim | 321120 |
| 32 | Hematology and | 321 | Hematology cells and sedim | 321130 |
| 32 | Hematology and | 321 | Hematology cells and sedim | 321150 |
| 32 | Hematology and | 321 | Hematology cells and sedim | 321170 |
| 32 | Hematology and | 321 | Hematology cells and sedim | 321190 |
| 32 | Hematology and | 321 | Hematology cells and sedim | 321211 |
| 32 | Hematology and | 321 | Hematology cells and sedim | 321220 |
| 32 | Hematology and | 321 | Hematology cells and sedim | 321260 |
| 32 | Hematology and | 321 | Hematology cells and sedim | 321262 |
| 32 | Hematology and | 321 | Hematology cells and sedim | 321270 |
| 32 | Hematology and | 322 | Hematology/urinalysis comb | 322000 |
| 32 | Hematology and | 322 | Hematology/urinalysis comb | 322100 |
| 32 | Hematology and | 322 | Hematology/urinalysis comb | 322110 |
| 32 | Hematology and | 322 | Hematology/urinalysis comb | 322120 |
| 32 | Hematology and | 322 | Hematology/urinalysis comb | 322130 |
| 32 | Hematology and | 322 | Hematology/urinalysis comb | 322210 |
| 32 | Hematology and | 322 | Hematology/urinalysis comb | 322220 |
| 32 | Hematology and | 322 | Hematology/urinalysis comb | 322230 |
| 32 | Hematology and | 323 | Hematology enzyme          | 323015 |
| 32 | Hematology and | 324 | Hematology protein         | 324001 |

|    |                |     |                              |        |
|----|----------------|-----|------------------------------|--------|
| 32 | Hematology and | 324 | Hematology protein           | 324002 |
| 32 | Hematology and | 324 | Hematology protein           | 324003 |
| 32 | Hematology and | 324 | Hematology protein           | 324011 |
| 32 | Hematology and | 324 | Hematology protein           | 324021 |
| 32 | Hematology and | 324 | Hematology protein           | 324025 |
| 32 | Hematology and | 324 | Hematology protein           | 324031 |
| 33 | Coagulation    | 331 | Coagulation cells and sedim  | 331015 |
| 33 | Coagulation    | 332 | Coagulation enzyme           | 332060 |
| 33 | Coagulation    | 332 | Coagulation enzyme           | 332070 |
| 33 | Coagulation    | 332 | Coagulation enzyme           | 332090 |
| 33 | Coagulation    | 332 | Coagulation enzyme           | 332100 |
| 33 | Coagulation    | 332 | Coagulation enzyme           | 332150 |
| 33 | Coagulation    | 332 | Coagulation enzyme           | 332170 |
| 33 | Coagulation    | 332 | Coagulation enzyme           | 332176 |
| 33 | Coagulation    | 332 | Coagulation enzyme           | 332190 |
| 33 | Coagulation    | 332 | Coagulation enzyme           | 332230 |
| 33 | Coagulation    | 332 | Coagulation enzyme           | 332240 |
| 33 | Coagulation    | 332 | Coagulation enzyme           | 332299 |
| 33 | Coagulation    | 333 | Coagulation protein          | 333001 |
| 33 | Coagulation    | 333 | Coagulation protein          | 333002 |
| 33 | Coagulation    | 333 | Coagulation protein          | 333011 |
| 33 | Coagulation    | 333 | Coagulation protein          | 333021 |
| 33 | Coagulation    | 334 | Coagulation vitamin and cof: | 334001 |
| 33 | Coagulation    | 334 | Coagulation vitamin and cof: | 334003 |
| 33 | Coagulation    | 334 | Coagulation vitamin and cof: | 334004 |
| 33 | Coagulation    | 334 | Coagulation vitamin and cof: | 334011 |
| 34 | Immunology     | 341 | Immunology antibody          | 341000 |
| 34 | Immunology     | 341 | Immunology antibody          | 341010 |
| 34 | Immunology     | 341 | Immunology antibody          | 341015 |
| 34 | Immunology     | 341 | Immunology antibody          | 341061 |
| 34 | Immunology     | 341 | Immunology antibody          | 341080 |
| 34 | Immunology     | 341 | Immunology antibody          | 341130 |
| 34 | Immunology     | 341 | Immunology antibody          | 341131 |
| 34 | Immunology     | 341 | Immunology antibody          | 341150 |
| 34 | Immunology     | 341 | Immunology antibody          | 341161 |
| 34 | Immunology     | 341 | Immunology antibody          | 341181 |
| 34 | Immunology     | 341 | Immunology antibody          | 341270 |
| 34 | Immunology     | 341 | Immunology antibody          | 341499 |

|    |            |     |                            |        |
|----|------------|-----|----------------------------|--------|
| 34 | Immunology | 342 | Immunology antigen         | 342400 |
| 34 | Immunology | 342 | Immunology antigen         | 342405 |
| 34 | Immunology | 342 | Immunology antigen         | 342410 |
| 34 | Immunology | 342 | Immunology antigen         | 342415 |
| 34 | Immunology | 342 | Immunology antigen         | 342420 |
| 34 | Immunology | 342 | Immunology antigen         | 342500 |
| 34 | Immunology | 342 | Immunology antigen         | 342510 |
| 34 | Immunology | 343 | Immunology cells and sedim | 343060 |
| 34 | Immunology | 343 | Immunology cells and sedim | 343065 |
| 34 | Immunology | 343 | Immunology cells and sedim | 343070 |
| 34 | Immunology | 343 | Immunology cells and sedim | 343071 |
| 34 | Immunology | 343 | Immunology cells and sedim | 343072 |
| 34 | Immunology | 343 | Immunology cells and sedim | 343100 |
| 34 | Immunology | 344 | Immunology protein         | 344010 |
| 34 | Immunology | 344 | Immunology protein         | 344011 |
| 34 | Immunology | 344 | Immunology protein         | 344050 |
| 34 | Immunology | 344 | Immunology protein         | 344070 |
| 34 | Immunology | 344 | Immunology protein         | 344080 |
| 34 | Immunology | 344 | Immunology protein         | 344140 |
| 34 | Immunology | 344 | Immunology protein         | 344145 |
| 34 | Immunology | 344 | Immunology protein         | 344150 |
| 34 | Immunology | 344 | Immunology protein         | 344160 |
| 34 | Immunology | 344 | Immunology protein         | 344161 |
| 34 | Immunology | 344 | Immunology protein         | 344170 |
| 34 | Immunology | 344 | Immunology protein         | 344180 |
| 34 | Immunology | 344 | Immunology protein         | 344299 |
| 35 | Blood bank | 350 | Blood bank unspecified     | 350000 |
| 35 | Blood bank | 351 | Blood bank antibody        | 351020 |
| 35 | Blood bank | 351 | Blood bank antibody        | 351030 |
| 35 | Blood bank | 351 | Blood bank antibody        | 351050 |
| 35 | Blood bank | 351 | Blood bank antibody        | 351060 |
| 35 | Blood bank | 351 | Blood bank antibody        | 351080 |
| 35 | Blood bank | 351 | Blood bank antibody        | 351090 |
| 35 | Blood bank | 351 | Blood bank antibody        | 351299 |
| 35 | Blood bank | 352 | Blood bank antigen         | 352010 |
| 35 | Blood bank | 352 | Blood bank antigen         | 352020 |
| 35 | Blood bank | 352 | Blood bank antigen         | 352030 |
| 35 | Blood bank | 352 | Blood bank antigen         | 352050 |

|    |              |     |                          |        |
|----|--------------|-----|--------------------------|--------|
| 35 | Blood bank   | 354 | Blood bank component     | 354020 |
| 35 | Blood bank   | 354 | Blood bank component     | 354041 |
| 35 | Blood bank   | 354 | Blood bank component     | 354042 |
| 35 | Blood bank   | 354 | Blood bank component     | 354050 |
| 35 | Blood bank   | 354 | Blood bank component     | 354051 |
| 35 | Blood bank   | 354 | Blood bank component     | 354052 |
| 35 | Blood bank   | 354 | Blood bank component     | 354053 |
| 35 | Blood bank   | 354 | Blood bank component     | 354054 |
| 35 | Blood bank   | 354 | Blood bank component     | 354060 |
| 35 | Blood bank   | 354 | Blood bank component     | 354062 |
| 35 | Blood bank   | 354 | Blood bank component     | 354063 |
| 35 | Blood bank   | 354 | Blood bank component     | 354069 |
| 35 | Blood bank   | 354 | Blood bank component     | 354080 |
| 35 | Blood bank   | 354 | Blood bank component     | 354082 |
| 35 | Blood bank   | 354 | Blood bank component     | 354083 |
| 35 | Blood bank   | 354 | Blood bank component     | 354100 |
| 35 | Blood bank   | 354 | Blood bank component     | 354299 |
| 35 | Blood bank   | 355 | Blood bank procedure     | 355199 |
| 36 | Microbiology | 360 | Microbiology unspecified | 360000 |
| 36 | Microbiology | 361 | Bacteriology             | 361100 |
| 36 | Microbiology | 361 | Bacteriology             | 361110 |
| 36 | Microbiology | 361 | Bacteriology             | 361120 |
| 36 | Microbiology | 361 | Bacteriology             | 361130 |
| 36 | Microbiology | 361 | Bacteriology             | 361200 |
| 36 | Microbiology | 361 | Bacteriology             | 361211 |
| 36 | Microbiology | 361 | Bacteriology             | 361222 |
| 36 | Microbiology | 361 | Bacteriology             | 361224 |
| 36 | Microbiology | 361 | Bacteriology             | 361225 |
| 36 | Microbiology | 361 | Bacteriology             | 361242 |
| 36 | Microbiology | 361 | Bacteriology             | 361249 |
| 36 | Microbiology | 361 | Bacteriology             | 361253 |
| 36 | Microbiology | 361 | Bacteriology             | 361261 |
| 36 | Microbiology | 361 | Bacteriology             | 361262 |
| 36 | Microbiology | 361 | Bacteriology             | 361263 |
| 36 | Microbiology | 361 | Bacteriology             | 361270 |
| 36 | Microbiology | 361 | Bacteriology             | 361283 |
| 36 | Microbiology | 361 | Bacteriology             | 361287 |
| 36 | Microbiology | 361 | Bacteriology             | 361288 |

|    |              |     |                 |        |
|----|--------------|-----|-----------------|--------|
| 36 | Microbiology | 361 | Bacteriology    | 361289 |
| 36 | Microbiology | 361 | Bacteriology    | 361301 |
| 36 | Microbiology | 361 | Bacteriology    | 361302 |
| 36 | Microbiology | 361 | Bacteriology    | 361303 |
| 36 | Microbiology | 361 | Bacteriology    | 361304 |
| 36 | Microbiology | 361 | Bacteriology    | 361311 |
| 36 | Microbiology | 361 | Bacteriology    | 361322 |
| 36 | Microbiology | 361 | Bacteriology    | 361325 |
| 36 | Microbiology | 361 | Bacteriology    | 361350 |
| 36 | Microbiology | 361 | Bacteriology    | 361500 |
| 36 | Microbiology | 361 | Bacteriology    | 361505 |
| 36 | Microbiology | 361 | Bacteriology    | 361600 |
| 36 | Microbiology | 361 | Bacteriology    | 361699 |
| 36 | Microbiology | 361 | Bacteriology    | 361999 |
| 36 | Microbiology | 362 | Yeast and fungi | 362010 |
| 36 | Microbiology | 362 | Yeast and fungi | 362011 |
| 36 | Microbiology | 362 | Yeast and fungi | 362040 |
| 36 | Microbiology | 362 | Yeast and fungi | 362052 |
| 36 | Microbiology | 362 | Yeast and fungi | 362070 |
| 36 | Microbiology | 362 | Yeast and fungi | 362071 |
| 36 | Microbiology | 362 | Yeast and fungi | 362499 |
| 36 | Microbiology | 363 | Parasites       | 363019 |
| 36 | Microbiology | 363 | Parasites       | 363022 |
| 36 | Microbiology | 363 | Parasites       | 363024 |
| 36 | Microbiology | 363 | Parasites       | 363036 |
| 36 | Microbiology | 363 | Parasites       | 363040 |
| 36 | Microbiology | 363 | Parasites       | 363041 |
| 36 | Microbiology | 363 | Parasites       | 363070 |
| 36 | Microbiology | 364 | Viruses         | 364005 |
| 36 | Microbiology | 364 | Viruses         | 364011 |
| 36 | Microbiology | 364 | Viruses         | 364014 |
| 36 | Microbiology | 364 | Viruses         | 364030 |
| 36 | Microbiology | 364 | Viruses         | 364051 |
| 36 | Microbiology | 364 | Viruses         | 364060 |
| 36 | Microbiology | 364 | Viruses         | 364091 |
| 36 | Microbiology | 364 | Viruses         | 364101 |
| 36 | Microbiology | 364 | Viruses         | 364122 |
| 36 | Microbiology | 364 | Viruses         | 364152 |

|    |              |     |                    |        |
|----|--------------|-----|--------------------|--------|
| 36 | Microbiology | 364 | Viruses            | 364162 |
| 36 | Microbiology | 364 | Viruses            | 364170 |
| 36 | Microbiology | 364 | Viruses            | 364180 |
| 36 | Microbiology | 364 | Viruses            | 364190 |
| 36 | Microbiology | 364 | Viruses            | 364226 |
| 36 | Microbiology | 364 | Viruses            | 364227 |
| 36 | Microbiology | 364 | Viruses            | 364235 |
| 36 | Microbiology | 364 | Viruses            | 364241 |
| 36 | Microbiology | 364 | Viruses            | 364242 |
| 36 | Microbiology | 364 | Viruses            | 364243 |
| 36 | Microbiology | 364 | Viruses            | 364251 |
| 36 | Microbiology | 364 | Viruses            | 364252 |
| 36 | Microbiology | 364 | Viruses            | 364253 |
| 36 | Microbiology | 364 | Viruses            | 364257 |
| 36 | Microbiology | 364 | Viruses            | 364300 |
| 36 | Microbiology | 364 | Viruses            | 364302 |
| 36 | Microbiology | 364 | Viruses            | 364303 |
| 36 | Microbiology | 364 | Viruses            | 364305 |
| 36 | Microbiology | 364 | Viruses            | 364310 |
| 36 | Microbiology | 364 | Viruses            | 364311 |
| 36 | Microbiology | 364 | Viruses            | 364315 |
| 36 | Microbiology | 364 | Viruses            | 364320 |
| 36 | Microbiology | 364 | Viruses            | 364322 |
| 36 | Microbiology | 364 | Viruses            | 364500 |
| 36 | Microbiology | 364 | Viruses            | 364601 |
| 36 | Microbiology | 364 | Viruses            | 364605 |
| 36 | Microbiology | 364 | Viruses            | 364999 |
| 37 | Pathology    | 372 | Surgical pathology | 372000 |
| 37 | Pathology    | 372 | Surgical pathology | 372300 |
| 37 | Pathology    | 372 | Surgical pathology | 372310 |
| 37 | Pathology    | 372 | Surgical pathology | 372320 |
| 37 | Pathology    | 372 | Surgical pathology | 372321 |
| 37 | Pathology    | 372 | Surgical pathology | 372322 |
| 37 | Pathology    | 372 | Surgical pathology | 372330 |
| 37 | Pathology    | 372 | Surgical pathology | 372331 |
| 37 | Pathology    | 372 | Surgical pathology | 372410 |
| 37 | Pathology    | 372 | Surgical pathology | 372422 |
| 37 | Pathology    | 372 | Surgical pathology | 372423 |

|    |                  |     |                            |        |
|----|------------------|-----|----------------------------|--------|
| 37 | Pathology        | 372 | Surgical pathology         | 372424 |
| 37 | Pathology        | 372 | Surgical pathology         | 372452 |
| 37 | Pathology        | 373 | Cytopathology              | 373100 |
| 37 | Pathology        | 373 | Cytopathology              | 373300 |
| 37 | Pathology        | 373 | Cytopathology              | 373399 |
| 38 | Cytogenetics and | 380 | Cytogenetics and molecular | 380000 |
| 38 | Cytogenetics and | 381 | Cytogenetics               | 381000 |
| 38 | Cytogenetics and | 381 | Cytogenetics               | 381010 |
| 38 | Cytogenetics and | 381 | Cytogenetics               | 381015 |
| 38 | Cytogenetics and | 382 | Molecular pathology        | 382000 |
| 38 | Cytogenetics and | 382 | Molecular pathology        | 382010 |
| 38 | Cytogenetics and | 382 | Molecular pathology        | 382030 |
| 38 | Cytogenetics and | 382 | Molecular pathology        | 382040 |
| 38 | Cytogenetics and | 382 | Molecular pathology        | 382042 |
| 38 | Cytogenetics and | 382 | Molecular pathology        | 382050 |
| 38 | Cytogenetics and | 382 | Molecular pathology        | 382052 |
| 38 | Cytogenetics and | 382 | Molecular pathology        | 382060 |
| 38 | Cytogenetics and | 382 | Molecular pathology        | 382070 |
| 38 | Cytogenetics and | 382 | Molecular pathology        | 382081 |
| 38 | Cytogenetics and | 382 | Molecular pathology        | 382082 |
| 38 | Cytogenetics and | 382 | Molecular pathology        | 382085 |
| 38 | Cytogenetics and | 382 | Molecular pathology        | 382100 |
| 38 | Cytogenetics and | 382 | Molecular pathology        | 382110 |
| 38 | Cytogenetics and | 382 | Molecular pathology        | 382120 |
| 38 | Cytogenetics and | 382 | Molecular pathology        | 382130 |
| 38 | Cytogenetics and | 382 | Molecular pathology        | 382140 |
| 38 | Cytogenetics and | 382 | Molecular pathology        | 382150 |
| 38 | Cytogenetics and | 382 | Molecular pathology        | 382160 |
| 38 | Cytogenetics and | 382 | Molecular pathology        | 382170 |
| 38 | Cytogenetics and | 382 | Molecular pathology        | 382180 |
| 38 | Cytogenetics and | 382 | Molecular pathology        | 382205 |
| 38 | Cytogenetics and | 382 | Molecular pathology        | 382206 |
| 38 | Cytogenetics and | 382 | Molecular pathology        | 382208 |
| 38 | Cytogenetics and | 382 | Molecular pathology        | 382213 |
| 38 | Cytogenetics and | 382 | Molecular pathology        | 382216 |
| 38 | Cytogenetics and | 382 | Molecular pathology        | 382221 |
| 38 | Cytogenetics and | 382 | Molecular pathology        | 382222 |
| 38 | Cytogenetics and | 382 | Molecular pathology        | 382224 |

|    |                  |     |                     |        |
|----|------------------|-----|---------------------|--------|
| 38 | Cytogenetics and | 382 | Molecular pathology | 382229 |
| 38 | Cytogenetics and | 382 | Molecular pathology | 382237 |
| 38 | Cytogenetics and | 382 | Molecular pathology | 382245 |
| 38 | Cytogenetics and | 382 | Molecular pathology | 382247 |
| 38 | Cytogenetics and | 382 | Molecular pathology | 382253 |
| 38 | Cytogenetics and | 382 | Molecular pathology | 382261 |
| 38 | Cytogenetics and | 382 | Molecular pathology | 382269 |
| 38 | Cytogenetics and | 382 | Molecular pathology | 382272 |
| 38 | Cytogenetics and | 382 | Molecular pathology | 382285 |
| 38 | Cytogenetics and | 382 | Molecular pathology | 382309 |
| 38 | Cytogenetics and | 382 | Molecular pathology | 382317 |
| 38 | Cytogenetics and | 382 | Molecular pathology | 382318 |
| 38 | Cytogenetics and | 382 | Molecular pathology | 382325 |
| 38 | Cytogenetics and | 382 | Molecular pathology | 382327 |
| 38 | Cytogenetics and | 382 | Molecular pathology | 382333 |
| 38 | Cytogenetics and | 382 | Molecular pathology | 382499 |
| 38 | Cytogenetics and | 382 | Molecular pathology | 382599 |
| 38 | Cytogenetics and | 382 | Molecular pathology | 382606 |
| 38 | Cytogenetics and | 382 | Molecular pathology | 382614 |
| 38 | Cytogenetics and | 382 | Molecular pathology | 382617 |
| 38 | Cytogenetics and | 382 | Molecular pathology | 382622 |
| 38 | Cytogenetics and | 382 | Molecular pathology | 382638 |
| 38 | Cytogenetics and | 382 | Molecular pathology | 382646 |
| 38 | Cytogenetics and | 382 | Molecular pathology | 382654 |
| 38 | Cytogenetics and | 382 | Molecular pathology | 382662 |
| 38 | Cytogenetics and | 382 | Molecular pathology | 382694 |
| 38 | Cytogenetics and | 382 | Molecular pathology | 382999 |
| 38 | Cytogenetics and | 383 | Sequencing          | 383006 |



| Lab Test Title                                   | N Visits | N Patients |
|--------------------------------------------------|----------|------------|
| Laboratory test unspecified                      | 32       | 20         |
| General health profile                           | 1        | 1          |
| Other specified multiple laboratory profile      | 2        | 1          |
| Specimen preparation                             | 48       | 34         |
| Other specified laboratory test                  | 27       | 19         |
| Chemistry test unspecified                       | 6        | 6          |
| 8-test chemistry profile                         | 230      | 66         |
| 14-test chemistry profile                        | 199      | 66         |
| Kidney profile                                   | 23       | 12         |
| Liver profile                                    | 96       | 40         |
| Blood gases                                      | 177      | 58         |
| Carbon dioxide (CO2)                             | 51       | 17         |
| O2 saturation                                    | 10       | 8          |
| pH                                               | 7        | 5          |
| Calcium                                          | 63       | 20         |
| Ionized calcium                                  | 136      | 50         |
| Chloride                                         | 64       | 28         |
| Copper                                           | 3        | 3          |
| Iron                                             | 5        | 5          |
| Iron binding capacity (TIBC)                     | 6        | 6          |
| Magnesium                                        | 205      | 65         |
| Osmolality                                       | 9        | 8          |
| Phosphorus                                       | 195      | 60         |
| Potassium                                        | 173      | 59         |
| Sodium                                           | 170      | 56         |
| Electrolyte profile                              | 24       | 16         |
| Other specified acid base tests and electrolytes | 1        | 1          |
| Amino acids and peptides unspecified             | 42       | 40         |
| Carnitine                                        | 35       | 32         |
| Methylmalonic acid                               | 2        | 2          |
| Mucopolysaccharides                              | 3        | 3          |
| Deoxypyridinoline crosslinks                     | 1        | 1          |
| Cystine                                          | 1        | 1          |
| Homocysteine                                     | 4        | 4          |
| Other specified amino acids and peptides         | 2        | 2          |
| Carbohydrates and metabolites unspecified        | 1        | 1          |
| Galactose                                        | 1        | 1          |

|                                                                     |     |    |
|---------------------------------------------------------------------|-----|----|
| Glucose unspecified                                                 | 48  | 41 |
| Random glucose                                                      | 227 | 69 |
| Ketone bodies                                                       | 7   | 4  |
| Lactic acid                                                         | 126 | 69 |
| Citric acid                                                         | 1   | 1  |
| Pyruvic acid                                                        | 26  | 25 |
| Reducing substances                                                 | 4   | 4  |
| Other specified carbohydrates and metabolites                       | 3   | 3  |
| Therapeutic drug monitoring (TDM) unspecified                       | 2   | 1  |
| Gentamicin therapeutic drug monitoring                              | 3   | 2  |
| Tobramycin therapeutic drug monitoring                              | 3   | 3  |
| Vancomycin therapeutic drug monitoring                              | 65  | 39 |
| Amikacin therapeutic drug monitoring                                | 1   | 1  |
| Antifungal therapeutic drug monitoring                              | 35  | 19 |
| Meprobamate therapeutic drug monitoring                             | 1   | 1  |
| Anticonvulsant therapeutic drug monitoring unspecified              | 1   | 1  |
| Carbamazepine therapeutic drug monitoring                           | 17  | 3  |
| Phenobarbital therapeutic drug monitoring                           | 2   | 2  |
| Phenytoin therapeutic drug monitoring                               | 10  | 7  |
| Valproic acid therapeutic drug monitoring                           | 7   | 1  |
| Trileptal therapeutic drug monitoring                               | 4   | 3  |
| Keppra therapeutic drug monitoring                                  | 14  | 10 |
| Other specified anticonvulsant therapeutic drug monitoring          | 5   | 5  |
| Cyclosporine therapeutic drug monitoring                            | 21  | 12 |
| Other specified immunosuppressant agent therapeutic drug monitoring | 66  | 26 |
| Drug monitoring other therapeutic category                          | 2   | 2  |
| Other specified therapeutic drug monitoring                         | 2   | 2  |
| Toxicology unspecified                                              | 16  | 12 |
| Lead toxicology                                                     | 3   | 3  |
| Zinc toxicology                                                     | 4   | 4  |
| Ethanol toxicology                                                  | 2   | 2  |
| Carbohydrate deficient transferrin                                  | 2   | 2  |
| Amphetamine toxicology                                              | 2   | 2  |
| Cocaine toxicology                                                  | 2   | 2  |
| Phencyclidine toxicology                                            | 2   | 2  |
| Cannabinoid toxicology                                              | 2   | 2  |
| Acetaminophen toxicology                                            | 3   | 3  |
| Barbiturate toxicology unspecified                                  | 2   | 2  |

|                                          |     |    |
|------------------------------------------|-----|----|
| Benzodiazepine toxicology                | 4   | 4  |
| Morphine and derivatives toxicology      | 3   | 3  |
| Salicylate toxicology                    | 3   | 3  |
| Carbon monoxide                          | 7   | 7  |
| Other specified toxicology               | 6   | 5  |
| Vitamin A                                | 2   | 2  |
| Vitamin B1                               | 1   | 1  |
| Vitamin B6                               | 1   | 1  |
| Vitamin B12                              | 7   | 6  |
| Folate                                   | 6   | 5  |
| Vitamin D                                | 43  | 25 |
| Calcitriol                               | 7   | 7  |
| Vitamin E                                | 4   | 4  |
| Other specified vitamins and cofactors   | 1   | 1  |
| Enzyme and isoenzyme unspecified         | 6   | 5  |
| Alanine aminotransferase (ALT)           | 58  | 27 |
| Aldolase                                 | 2   | 2  |
| Alkaline phosphatase                     | 51  | 23 |
| Bone specific alkaline phosphatase       | 2   | 2  |
| Amylase                                  | 32  | 22 |
| Aspartate aminotransferase (AST)         | 54  | 26 |
| Biotinidase                              | 4   | 4  |
| Creatine kinase (CK)                     | 35  | 30 |
| Creatine kinase (CPK) isoenzyme          | 1   | 1  |
| Gamma-glutamyl transpeptidase (GGT)      | 85  | 36 |
| Hexosaminidase                           | 5   | 5  |
| Lactate dehydrogenase (LD) (LDH)         | 102 | 36 |
| Lipase                                   | 46  | 27 |
| Lysozyme                                 | 23  | 20 |
| Galactose-1-phosphate uridyl transferase | 2   | 2  |
| Pancreatic elastase 1 (PE1)              | 1   | 1  |
| Other specified enzyme and isoenzyme     | 17  | 16 |
| Hormone unspecified                      | 1   | 1  |
| Chorionic gonadotropin (HCG)             | 1   | 1  |
| Follicle stimulating hormone (FSH)       | 2   | 2  |
| Human growth hormone (HGH)               | 1   | 1  |
| IGF binding protein-3 (IGFBP-3)          | 2   | 2  |
| Insulin-like growth factor I (IGF-I)     | 2   | 2  |

|                                                 |    |    |
|-------------------------------------------------|----|----|
| Luteinizing hormone (LH)                        | 2  | 2  |
| Thyroid stimulating hormone (TSH)               | 45 | 37 |
| Calcitonin                                      | 34 | 18 |
| Parathyroid hormone (PTH)                       | 10 | 9  |
| Thyroxine (T4)                                  | 4  | 4  |
| Free thyroxine                                  | 36 | 28 |
| Free triiodothyronine (free T3)                 | 1  | 1  |
| Other specified thyroid and parathyroid hormone | 1  | 1  |
| Testosterone                                    | 1  | 1  |
| Other specified gonadal hormone                 | 2  | 2  |
| Insulin                                         | 2  | 2  |
| Proinsulin                                      | 1  | 1  |
| Adrenocorticotrophic hormone (ACTH)             | 6  | 5  |
| Aldosterone                                     | 3  | 3  |
| Cortisol                                        | 35 | 22 |
| 17-Hydroxyprogesterone                          | 2  | 2  |
| Homovanillic acid (HVA)                         | 1  | 1  |
| Metanephrines                                   | 1  | 1  |
| Vanillylmandelic acid (VMA)                     | 1  | 1  |
| Other specified catecholamines                  | 1  | 1  |
| Trypsin                                         | 1  | 1  |
| Renin                                           | 3  | 3  |
| B-type natriuretic peptide (BNP)                | 19 | 7  |
| Lipid unspecified                               | 9  | 7  |
| Total cholesterol                               | 8  | 7  |
| Fatty acid profile                              | 1  | 1  |
| Free fatty acid                                 | 1  | 1  |
| Very long chain fatty acid                      | 23 | 23 |
| High density lipoprotein (HDL)                  | 3  | 2  |
| Low density lipoprotein (LDL)                   | 1  | 1  |
| Triglycerides                                   | 43 | 32 |
| Other specified lipid                           | 1  | 1  |
| Ammonia                                         | 47 | 37 |
| Bilirubin                                       | 4  | 2  |
| Total bilirubin                                 | 45 | 21 |
| Direct bilirubin                                | 51 | 23 |
| Indirect bilirubin                              | 10 | 4  |
| Creatine                                        | 2  | 2  |

|                                               |     |    |
|-----------------------------------------------|-----|----|
| Creatinine                                    | 99  | 39 |
| Oxalate                                       | 1   | 1  |
| Urea nitrogen                                 | 71  | 30 |
| Uric acid                                     | 15  | 12 |
| Albumin                                       | 75  | 38 |
| Prealbumin                                    | 24  | 17 |
| Glycated albumin                              | 1   | 1  |
| Ferritin                                      | 11  | 9  |
| Total protein                                 | 88  | 54 |
| Protein electrophoresis                       | 5   | 4  |
| Transferrin                                   | 1   | 1  |
| Troponin                                      | 2   | 2  |
| Myelin                                        | 1   | 1  |
| Ceruloplasmin                                 | 2   | 2  |
| Cystatin C                                    | 11  | 11 |
| Erythrocyte sedimentation rate (ESR)          | 24  | 20 |
| Examination for leukocytes                    | 1   | 1  |
| Hematocrit                                    | 125 | 46 |
| Leukocyte alkaline phosphatase stain (LAP)    | 4   | 4  |
| Microscopic examination of urine              | 4   | 3  |
| Occult blood                                  | 25  | 16 |
| Periodic acid-Schiff stain (PAS stain)        | 2   | 1  |
| Platelet count                                | 21  | 17 |
| Peripheral blood smear evaluation             | 17  | 8  |
| Reticulocyte count                            | 70  | 33 |
| White blood cell count without differential   | 13  | 8  |
| Leukocyte differential count                  | 75  | 21 |
| Volume determination                          | 13  | 10 |
| Hematology/urinalysis combination test unspec | 1   | 1  |
| Urinalysis unspecified                        | 7   | 4  |
| Chemical examination of urine                 | 15  | 10 |
| Complete urinalysis                           | 159 | 56 |
| Macroscopic urinalysis                        | 40  | 22 |
| CBC with differential                         | 343 | 91 |
| CBC without differential                      | 93  | 44 |
| Hematology exam other body fluid              | 57  | 46 |
| Pyruvate kinase test                          | 1   | 1  |
| Haptoglobin                                   | 25  | 18 |

|                                           |    |    |
|-------------------------------------------|----|----|
| Hemoglobin                                | 55 | 32 |
| Plasma hemoglobin                         | 6  | 6  |
| Hemoglobin A1C (HgbA1C)                   | 2  | 2  |
| Hemoglobin electrophoresis                | 1  | 1  |
| Hemoglobin S                              | 9  | 6  |
| Methemoglobin                             | 5  | 5  |
| Platelet antibody                         | 5  | 4  |
| Factor VIII assay                         | 2  | 2  |
| Factor IX assay                           | 1  | 1  |
| Factor XI assay                           | 1  | 1  |
| Factor XII assay                          | 1  | 1  |
| Partial thromboplastin time (PTT)         | 80 | 49 |
| Prothrombin time (PT)                     | 83 | 50 |
| Dilute Russell's viper venom time (DRVVT) | 1  | 1  |
| Substitution study                        | 3  | 3  |
| D-Dimer                                   | 5  | 5  |
| Thromboelastograph (TEG)                  | 1  | 1  |
| Other specified coagulation enzyme        | 2  | 2  |
| Fibrinogen level                          | 45 | 30 |
| Circulating anticoagulant                 | 1  | 1  |
| Protein C                                 | 2  | 2  |
| Protein S                                 | 1  | 1  |
| Antithrombin III                          | 3  | 3  |
| Heparin assay                             | 4  | 2  |
| Thrombin clotting time (TCT)              | 1  | 1  |
| Coagulation factor inhibitor              | 2  | 2  |
| Immunology antibody unspecified           | 3  | 3  |
| Allergen specific IgE                     | 2  | 2  |
| Anticardiolipin antibody                  | 1  | 1  |
| Liver kidney microsomal antibody          | 2  | 2  |
| Antinuclear antibody (ANA)                | 2  | 2  |
| Acetylcholine receptor antibody           | 3  | 3  |
| Neuronal antibody                         | 2  | 2  |
| Anti-smooth muscle antibody               | 1  | 1  |
| Calprotectin                              | 1  | 1  |
| Western blot                              | 1  | 1  |
| SSA autoantibody                          | 1  | 1  |
| Other specified immunology antibody       | 1  | 1  |

|                                        |     |    |
|----------------------------------------|-----|----|
| HLA complete typing                    | 1   | 1  |
| HLA ABC typing                         | 16  | 15 |
| HLA DR typing                          | 3   | 3  |
| HLA DNA primary typing                 | 4   | 4  |
| HLA DNA high resolution typing         | 4   | 4  |
| HLA antibody screen                    | 1   | 1  |
| Flow cytometric antibody screen        | 8   | 8  |
| Mitogen response assay for lymphocytes | 3   | 3  |
| Mixed lymphocyte culture               | 1   | 1  |
| Quantitation of T and B lymphocytes    | 31  | 18 |
| T cells                                | 41  | 25 |
| B cells                                | 40  | 24 |
| Cell surface markers                   | 50  | 29 |
| C-reactive protein (CRP)               | 124 | 49 |
| hs-CRP                                 | 6   | 2  |
| Alpha-1 antitrypsin                    | 3   | 3  |
| C3                                     | 1   | 1  |
| C4                                     | 1   | 1  |
| IgA                                    | 25  | 15 |
| IgD                                    | 1   | 1  |
| IgE                                    | 12  | 10 |
| IgG                                    | 77  | 38 |
| IgG subclass quantitation              | 1   | 1  |
| IgM                                    | 25  | 15 |
| Immunoglobulins                        | 6   | 5  |
| Other specified immunology protein     | 2   | 2  |
| Blood bank unspecified                 | 1   | 1  |
| Antibody identification                | 11  | 9  |
| Antibody screen                        | 89  | 46 |
| Crossmatch                             | 55  | 35 |
| Direct antiglobulin test               | 39  | 25 |
| Antibody elution                       | 7   | 7  |
| Leukoagglutination assay               | 1   | 1  |
| Other specified blood bank antibody    | 3   | 3  |
| ABO type antigen                       | 88  | 44 |
| ABO Rh type antigens                   | 45  | 23 |
| Antigen screen                         | 3   | 3  |
| Rh phenotype antigen                   | 89  | 46 |

|                                               |     |    |
|-----------------------------------------------|-----|----|
| Cryoprecipitate (cryo)                        | 6   | 3  |
| Fresh frozen single donor plasma              | 6   | 5  |
| Single donor plasma                           | 1   | 1  |
| Red blood cells unspecified                   | 4   | 2  |
| Frozen and washed red blood cells             | 2   | 2  |
| Irradiated red blood cells                    | 1   | 1  |
| Leukocyte poor red blood cells                | 17  | 10 |
| Packed red blood cells                        | 8   | 8  |
| Platelets unspecified                         | 1   | 1  |
| HLA-matched platelets                         | 3   | 1  |
| Single donor apheresis platelets              | 8   | 7  |
| Other specified platelets                     | 1   | 1  |
| Irradiated leukocyte poor red blood cells     | 31  | 19 |
| Irradiated single donor apheresis platelets   | 26  | 18 |
| Irradiated platelets                          | 1   | 1  |
| Blood processing                              | 60  | 32 |
| Other specified blood bank components         | 1   | 1  |
| Other specified blood bank procedures         | 1   | 1  |
| Microbiology test unspecified                 | 1   | 1  |
| Bacterial cultures unspecified                | 2   | 1  |
| Aerobic cultures                              | 223 | 67 |
| Anaerobic cultures                            | 7   | 5  |
| Aerobic and anaerobic cultures                | 206 | 63 |
| Bacterial test unspecified                    | 83  | 33 |
| Bordetella pertussis                          | 1   | 1  |
| Campylobacter                                 | 18  | 12 |
| E coli                                        | 18  | 12 |
| E coli 0157 antigen                           | 2   | 2  |
| Clostridium difficile toxin                   | 19  | 12 |
| Other specified Clostridium difficile         | 10  | 9  |
| Legionella pneumophila antigen                | 3   | 2  |
| Mycobacteria culture                          | 8   | 8  |
| Acid fast stain                               | 2   | 2  |
| QuantiFERON TB Gold                           | 3   | 2  |
| Staphylococcus                                | 24  | 7  |
| Anti-streptolysin O titer                     | 1   | 1  |
| Beta hemolytic streptococcus antigen detector | 5   | 5  |
| Streptococcus pneumoniae                      | 2   | 2  |



|                                               |    |    |
|-----------------------------------------------|----|----|
| Other specified streptococcus                 | 19 | 13 |
| Dark-field exam                               | 2  | 2  |
| Flourescent treponemal antibody-absorption (F | 3  | 3  |
| Rapid plasma reagin (RPR)                     | 1  | 1  |
| VDRL                                          | 4  | 4  |
| H influenza                                   | 1  | 1  |
| Mycoplasma DNA probe                          | 60 | 23 |
| Mycoplasma serology                           | 2  | 2  |
| Yersinia unspecified                          | 2  | 2  |
| Sensitivity/susceptibility test               | 22 | 15 |
| Minimum inhibitory concentration (MIC)        | 76 | 29 |
| Gram stain                                    | 78 | 42 |
| Other specified bacteria antibody             | 1  | 1  |
| Other specified bacteriology                  | 7  | 5  |
| Aspergillus antibody                          | 1  | 1  |
| Aspergillus antigen                           | 6  | 3  |
| Coccidiodes antibody                          | 1  | 1  |
| Cryptococcus antigen                          | 2  | 2  |
| Fungal culture                                | 35 | 25 |
| Fungal stain                                  | 1  | 1  |
| Other specified yeast and fungi               | 1  | 1  |
| Other specified parasitic antibody            | 5  | 5  |
| Cryptosporidium                               | 7  | 5  |
| Giardia                                       | 7  | 5  |
| Toxoplasma serology                           | 8  | 8  |
| Ova and parasites                             | 5  | 5  |
| Ova and parasites trichrome stain             | 4  | 3  |
| Wet prep for parasites                        | 1  | 1  |
| Viral antibody unspecified                    | 2  | 2  |
| Cytomegalovirus antibody                      | 15 | 11 |
| Cytomegalovirus antigen                       | 3  | 2  |
| Epstein-Barr virus                            | 11 | 10 |
| Herpes simplex antibody                       | 11 | 11 |
| Infectious mononucleosis screen               | 1  | 1  |
| Rubella antibody                              | 1  | 1  |
| Rubeola antibody                              | 1  | 1  |
| West Nile virus antibody                      | 1  | 1  |
| Influenza A and B antigen                     | 25 | 13 |

|                                                 |    |    |
|-------------------------------------------------|----|----|
| Parainfluenza antigen                           | 2  | 2  |
| Rotavirus antigen detection                     | 14 | 9  |
| Varicella zoster                                | 10 | 10 |
| Adenovirus                                      | 22 | 9  |
| HTLV-I antibody                                 | 3  | 3  |
| HTLV-II antibody                                | 2  | 2  |
| Parvovirus test                                 | 1  | 1  |
| Respiratory syncytial virus antibody            | 15 | 3  |
| Respiratory syncytial virus antigen             | 17 | 8  |
| Respiratory syncytial virus culture             | 2  | 2  |
| HIV-1 antibody                                  | 7  | 7  |
| HIV-2 antibody                                  | 1  | 1  |
| HIV antigen                                     | 7  | 6  |
| HIV DNA polymerase chain reaction (PCR)         | 4  | 4  |
| Hepatitis test unspecified                      | 3  | 3  |
| Hepatitis A viral antibody (HAV) total          | 8  | 7  |
| Hepatitis A viral antibody IgM (HAV-Ab IgM)     | 3  | 3  |
| Hepatitis B core antibody (HBcAb)               | 5  | 5  |
| Hepatitis B surface antibody (HBsAb)            | 7  | 6  |
| Hepatitis B surface antigen (HBsAg)             | 7  | 7  |
| Hepatitis B viral DNA                           | 2  | 2  |
| Hepatitis C antibody (HCV)                      | 7  | 7  |
| Hepatitis C RNA (HCV RNA)                       | 2  | 2  |
| Other specified viral culture                   | 16 | 11 |
| Cytomegalovirus PCR                             | 1  | 1  |
| Epstein-Barr virus PCR                          | 1  | 1  |
| Other specified viruses                         | 4  | 4  |
| Surgical pathology unspecified                  | 2  | 2  |
| Surgical specimen staining unspecified (Group   | 14 | 10 |
| Surgical specimen staining with microbial stain | 9  | 7  |
| Surgical specimen staining with immunological   | 1  | 1  |
| Surgical specimen staining with peroxidase sta  | 5  | 4  |
| Surgical specimen staining with fluorescent sta | 2  | 2  |
| Surgical specimen staining with histochemical : | 6  | 6  |
| Surgical specimen staining with enzyme          | 1  | 1  |
| Surgical pathology gross exam only              | 2  | 2  |
| Surgical pathology exam gross and micro prim    | 6  | 3  |
| Surgical pathology exam gross and micro exter   | 19 | 13 |

|                                                    |     |    |
|----------------------------------------------------|-----|----|
| Surgical pathology exam gross and micro comp       | 5   | 4  |
| Surgical pathology with transmission electron m    | 1   | 1  |
| Specimen collection                                | 232 | 69 |
| Cytopathology slide reading/interpretation         | 12  | 8  |
| Other specified cytopathology                      | 5   | 4  |
| Cytogenetics and molecular pathology unspeci       | 1   | 1  |
| Cytogenetics unspecified                           | 1   | 1  |
| Chromosome analysis                                | 4   | 4  |
| Tissue culture for chromosome analysis             | 8   | 6  |
| Molecular pathology unspecified                    | 15  | 13 |
| Molecular extraction                               | 15  | 7  |
| Molecular separation                               | 5   | 3  |
| Nucleic acid probe                                 | 35  | 20 |
| Microbial identification nucleic acid probe        | 30  | 15 |
| Polymerase chain reaction (PCR)                    | 57  | 32 |
| Microbial identification nucleic acid probe with a | 175 | 63 |
| Molecular diagnostics interpretation and report    | 10  | 8  |
| In situ hybridization                              | 3   | 3  |
| Chromosomal microarray                             | 5   | 5  |
| Duplication/Deletion                               | 1   | 1  |
| Morphometric analysis                              | 1   | 1  |
| Molecular pathology procedure, level 1             | 2   | 2  |
| Molecular pathology procedure, level 2             | 6   | 5  |
| Molecular pathology procedure, level 3             | 1   | 1  |
| Molecular pathology procedure, level 4             | 2   | 1  |
| Molecular pathology procedure, level 5             | 3   | 2  |
| Molecular pathology procedure, level 6             | 2   | 2  |
| Molecular pathology procedure, level 7             | 6   | 6  |
| Molecular pathology procedure, level 8             | 3   | 3  |
| Molecular pathology procedure, level 9             | 2   | 2  |
| Cytomegalovirus PCR                                | 70  | 26 |
| Cytomegalovirus RT-PCR                             | 2   | 2  |
| Cytomegalovirus DNA probe                          | 6   | 4  |
| Epstein-Barr virus PCR                             | 53  | 21 |
| Epstein-Barr virus DNA probe                       | 9   | 5  |
| Herpes virus PCR                                   | 15  | 13 |
| Herpes virus RT-PCR                                | 9   | 5  |
| Herpes virus DNA probe                             | 3   | 2  |

|                                                 |    |    |
|-------------------------------------------------|----|----|
| West Nile virus PCR                             | 2  | 2  |
| Influenza virus PCR                             | 16 | 12 |
| Parainfluenza virus PCR                         | 10 | 3  |
| Parainfluenza virus RNA                         | 6  | 2  |
| Metapneumovirus PCR                             | 11 | 5  |
| Rotavirus PCR                                   | 1  | 1  |
| Adenovirus PCR                                  | 48 | 25 |
| Adenovirus DNA probe                            | 32 | 14 |
| Echovirus PCR                                   | 1  | 1  |
| Parvovirus PCR                                  | 4  | 4  |
| Respiratory syncytial virus PCR                 | 23 | 12 |
| Respiratory syncytial virus RT-PCR              | 4  | 3  |
| Rhinovirus PCR                                  | 2  | 1  |
| Rhinovirus RNA                                  | 6  | 2  |
| Enterovirus PCR                                 | 12 | 10 |
| Other specified molecular pathology             | 2  | 2  |
| Other specified viral molecular pathology       | 5  | 1  |
| Methicillin resistant staphylococcus (MRSA) PCR | 18 | 11 |
| Clostridium difficile PCR                       | 5  | 3  |
| Clostridium difficile DNA probe                 | 16 | 7  |
| Bordetella pertussis PCR                        | 17 | 10 |
| Escherichia coli PCR                            | 1  | 1  |
| Chlamydia PCR                                   | 22 | 11 |
| Neisseria PCR                                   | 2  | 2  |
| Varicella PCR                                   | 9  | 8  |
| Toxoplasma PCR                                  | 2  | 2  |
| Other specified molecular pathology             | 9  | 8  |
| Next generation sequencing (NGS)                | 1  | 1  |

| Imaging Category | Imaging Category Title                             | Imaging Procedure |
|------------------|----------------------------------------------------|-------------------|
| 40               | Whole body imaging and imaging of unspecified site | 4000              |
| 40               | Whole body imaging and imaging of unspecified site | 4000              |
| 40               | Whole body imaging and imaging of unspecified site | 4000              |
| 40               | Whole body imaging and imaging of unspecified site | 4000              |
| 40               | Whole body imaging and imaging of unspecified site | 4001              |
| 40               | Whole body imaging and imaging of unspecified site | 4009              |
| 40               | Whole body imaging and imaging of unspecified site | 4009              |
| 40               | Whole body imaging and imaging of unspecified site | 4009              |
| 40               | Whole body imaging and imaging of unspecified site | 4010              |
| 41               | Neuro and head imaging                             | 4110              |
| 41               | Neuro and head imaging                             | 4110              |
| 41               | Neuro and head imaging                             | 4110              |
| 41               | Neuro and head imaging                             | 4110              |
| 41               | Neuro and head imaging                             | 4110              |
| 41               | Neuro and head imaging                             | 4110              |
| 41               | Neuro and head imaging                             | 4160              |
| 41               | Neuro and head imaging                             | 4163              |
| 41               | Neuro and head imaging                             | 4170              |
| 41               | Neuro and head imaging                             | 4170              |
| 41               | Neuro and head imaging                             | 4170              |
| 41               | Neuro and head imaging                             | 4180              |
| 42               | Bone and joint imaging                             | 4210              |
| 42               | Bone and joint imaging                             | 4213              |
| 42               | Bone and joint imaging                             | 4220              |
| 42               | Bone and joint imaging                             | 4220              |
| 42               | Bone and joint imaging                             | 4221              |
| 42               | Bone and joint imaging                             | 4221              |
| 42               | Bone and joint imaging                             | 4223              |
| 42               | Bone and joint imaging                             | 4224              |
| 42               | Bone and joint imaging                             | 4224              |
| 42               | Bone and joint imaging                             | 4226              |
| 42               | Bone and joint imaging                             | 4229              |
| 42               | Bone and joint imaging                             | 4231              |
| 42               | Bone and joint imaging                             | 4237              |
| 42               | Bone and joint imaging                             | 4250              |
| 42               | Bone and joint imaging                             | 4251              |
| 42               | Bone and joint imaging                             | 4251              |
| 42               | Bone and joint imaging                             | 4252              |

|    |                                 |      |
|----|---------------------------------|------|
| 42 | Bone and joint imaging          | 4253 |
| 42 | Bone and joint imaging          | 4254 |
| 42 | Bone and joint imaging          | 4256 |
| 42 | Bone and joint imaging          | 4273 |
| 42 | Bone and joint imaging          | 4275 |
| 42 | Bone and joint imaging          | 4278 |
| 42 | Bone and joint imaging          | 4279 |
| 42 | Bone and joint imaging          | 4281 |
| 43 | Chest and thorax imaging        | 4330 |
| 43 | Chest and thorax imaging        | 4330 |
| 43 | Chest and thorax imaging        | 4330 |
| 43 | Chest and thorax imaging        | 4330 |
| 43 | Chest and thorax imaging        | 4331 |
| 43 | Chest and thorax imaging        | 4332 |
| 43 | Chest and thorax imaging        | 4332 |
| 43 | Chest and thorax imaging        | 4333 |
| 43 | Chest and thorax imaging        | 4339 |
| 44 | Gastrointestinal system imaging | 4410 |
| 44 | Gastrointestinal system imaging | 4410 |
| 44 | Gastrointestinal system imaging | 4411 |
| 44 | Gastrointestinal system imaging | 4411 |
| 44 | Gastrointestinal system imaging | 4413 |
| 44 | Gastrointestinal system imaging | 4416 |
| 44 | Gastrointestinal system imaging | 4417 |
| 44 | Gastrointestinal system imaging | 4421 |
| 44 | Gastrointestinal system imaging | 4422 |
| 44 | Gastrointestinal system imaging | 4422 |
| 44 | Gastrointestinal system imaging | 4422 |
| 44 | Gastrointestinal system imaging | 4431 |
| 44 | Gastrointestinal system imaging | 4432 |
| 44 | Gastrointestinal system imaging | 4434 |
| 44 | Gastrointestinal system imaging | 4435 |
| 44 | Gastrointestinal system imaging | 4451 |
| 44 | Gastrointestinal system imaging | 4451 |
| 44 | Gastrointestinal system imaging | 4452 |
| 45 | Genitourinary system imaging    | 4520 |
| 45 | Genitourinary system imaging    | 4520 |
| 45 | Genitourinary system imaging    | 4544 |

|    |                               |      |
|----|-------------------------------|------|
| 45 | Genitourinary system imaging  | 4550 |
| 45 | Genitourinary system imaging  | 4562 |
| 45 | Genitourinary system imaging  | 4570 |
| 46 | Cardiovascular system imaging | 4630 |
| 46 | Cardiovascular system imaging | 4630 |
| 46 | Cardiovascular system imaging | 4630 |
| 46 | Cardiovascular system imaging | 4630 |
| 46 | Cardiovascular system imaging | 4642 |
| 46 | Cardiovascular system imaging | 4642 |
| 46 | Cardiovascular system imaging | 4644 |
| 46 | Cardiovascular system imaging | 4644 |
| 46 | Cardiovascular system imaging | 4645 |
| 47 | Arteriography                 | 4700 |
| 47 | Arteriography                 | 4710 |
| 47 | Arteriography                 | 4710 |
| 47 | Arteriography                 | 4730 |
| 47 | Arteriography                 | 4730 |
| 47 | Arteriography                 | 4750 |
| 47 | Arteriography                 | 4755 |
| 47 | Arteriography                 | 4770 |
| 48 | Venography                    | 4800 |
| 48 | Venography                    | 4852 |
| 49 | Interventional radiology      | 4944 |
| 49 | Interventional radiology      | 4944 |
| 49 | Interventional radiology      | 4970 |

| Imaging Procedure Title                  | Imaging Technique | Imaging Technique Title | Imaging Service |
|------------------------------------------|-------------------|-------------------------|-----------------|
| Unspecified                              | 11                | X-ray                   | 400011          |
| Unspecified                              | 22                | Fluoroscopy             | 400022          |
| Unspecified                              | 41                | Ultrasound real-time    | 400041          |
| Unspecified                              | 53                | MRI spectroscopy        | 400053          |
| Imaging guidance for clinical procedures | 41                | Ultrasound real-time    | 400141          |
| Other                                    | 0                 | Unspecified technique   | 400900          |
| Other                                    | 11                | X-ray                   | 400911          |
| Other                                    | 15                | Image reconstruction    | 400915          |
| Whole body imaging                       | 40                | Ultrasound              | 401040          |
| Brain imaging                            | 40                | Ultrasound              | 411040          |
| Brain imaging                            | 45                | Doppler                 | 411045          |
| Brain imaging                            | 51                | CT                      | 411051          |
| Brain imaging                            | 52                | MRI                     | 411052          |
| Brain imaging                            | 62                | SPECT                   | 411062          |
| Neck (soft tissue) imaging               | 11                | X-ray                   | 416011          |
| Salivary gland imaging                   | 63                | Planar imaging          | 416363          |
| Combination head and neck imaging        | 40                | Ultrasound              | 417040          |
| Combination head and neck imaging        | 51                | CT                      | 417051          |
| Combination head and neck imaging        | 52                | MRI                     | 417052          |
| Dental radiology                         | 11                | X-ray                   | 418011          |
| Skull and cranium imaging                | 11                | X-ray                   | 421011          |
| Facial bones imaging                     | 51                | CT                      | 421351          |
| Spine imaging                            | 11                | X-ray                   | 422011          |
| Spine imaging                            | 22                | Fluoroscopy             | 422022          |
| Cervical spine imaging                   | 11                | X-ray                   | 422111          |
| Cervical spine imaging                   | 52                | MRI                     | 422152          |
| Thoracic spine imaging                   | 52                | MRI                     | 422352          |
| Lumbar spine imaging                     | 11                | X-ray                   | 422411          |
| Lumbar spine imaging                     | 52                | MRI                     | 422452          |
| Pelvis imaging                           | 11                | X-ray                   | 422611          |
| Other spine and pelvis imaging           | 11                | X-ray                   | 422911          |
| Shoulder imaging                         | 11                | X-ray                   | 423111          |
| Hand imaging                             | 11                | X-ray                   | 423711          |
| Lower extremity imaging                  | 11                | X-ray                   | 425011          |
| Hip imaging                              | 11                | X-ray                   | 425111          |
| Hip imaging                              | 41                | Ultrasound real-time    | 425141          |
| Femur imaging                            | 11                | X-ray                   | 425211          |



|                                               |    |                        |        |
|-----------------------------------------------|----|------------------------|--------|
| Knee patella and popliteal fossa imaging      | 11 | X-ray                  | 425311 |
| Lower leg imaging                             | 11 | X-ray                  | 425411 |
| Foot imaging                                  | 11 | X-ray                  | 425611 |
| Bone density imaging                          | 65 | Dual photon absorption | 427365 |
| Bone scan limited                             | 63 | Planar imaging         | 427563 |
| Skeletal survey                               | 11 | X-ray                  | 427811 |
| Scoliosis survey                              | 11 | X-ray                  | 427911 |
| Extremities imaging                           | 41 | Ultrasound real-time   | 428141 |
| Chest imaging                                 | 11 | X-ray                  | 433011 |
| Chest imaging                                 | 41 | Ultrasound real-time   | 433041 |
| Chest imaging                                 | 51 | CT                     | 433051 |
| Chest imaging                                 | 99 | Other technique        | 433099 |
| Chest posterior anterior (PA) imaging         | 11 | X-ray                  | 433111 |
| Chest anterior posterior (AP) imaging         | 11 | X-ray                  | 433211 |
| Chest anterior posterior (AP) imaging         | 22 | Fluoroscopy            | 433222 |
| Chest PA and lateral imaging                  | 11 | X-ray                  | 433311 |
| Other chest imaging                           | 11 | X-ray                  | 433911 |
| Abdomen and pelvis imaging                    | 41 | Ultrasound real-time   | 441041 |
| Abdomen and pelvis imaging                    | 51 | CT                     | 441051 |
| Upper abdomen imaging                         | 22 | Fluoroscopy            | 441122 |
| Upper abdomen imaging                         | 41 | Ultrasound real-time   | 441141 |
| Abdomen supine imaging                        | 11 | X-ray                  | 441311 |
| Abdomen supine/upright/decubitus/cross-table  | 11 | X-ray                  | 441611 |
| GI bleeding scan (Meckel's scan)              | 63 | Planar imaging         | 441763 |
| Pharynx imaging                               | 21 | Cine                   | 442121 |
| Esophagus imaging                             | 21 | Cine                   | 442221 |
| Esophagus imaging                             | 22 | Fluoroscopy            | 442222 |
| Esophagus imaging                             | 63 | Planar imaging         | 442263 |
| Stomach and upper GI imaging                  | 22 | Fluoroscopy            | 443122 |
| Upper GI with small bowel follow-through imag | 22 | Fluoroscopy            | 443222 |
| Pylorus imaging                               | 41 | Ultrasound real-time   | 443441 |
| Gastric emptying study                        | 63 | Planar imaging         | 443563 |
| Liver and biliary tree imaging                | 11 | X-ray                  | 445111 |
| Liver and biliary tree imaging                | 41 | Ultrasound real-time   | 445141 |
| Gall bladder imaging                          | 41 | Ultrasound real-time   | 445241 |
| Kidney imaging                                | 41 | Ultrasound real-time   | 452041 |
| Kidney imaging                                | 42 | Ultrasound B mode      | 452042 |
| Voiding cystogram and cystourethrogram        | 22 | Fluoroscopy            | 454422 |

|                                               |    |                       |        |
|-----------------------------------------------|----|-----------------------|--------|
| Female reproductive system and pelvis imagin  | 41 | Ultrasound real-time  | 455041 |
| Testicle imaging                              | 41 | Ultrasound real-time  | 456241 |
| Retroperitoneum imaging                       | 41 | Ultrasound real-time  | 457041 |
| Heart nonstress test                          | 40 | Ultrasound            | 463040 |
| Heart nonstress test                          | 41 | Ultrasound real-time  | 463041 |
| Heart nonstress test                          | 45 | Doppler               | 463045 |
| Heart nonstress test                          | 46 | Doppler color         | 463046 |
| Noninvasive vascular imaging of lower extremi | 40 | Ultrasound            | 464240 |
| Noninvasive vascular imaging of lower extremi | 45 | Doppler               | 464245 |
| Noninvasive vascular imaging of abdomen       | 40 | Ultrasound            | 464440 |
| Noninvasive vascular imaging of abdomen       | 45 | Doppler               | 464445 |
| Noninvasive imaging of thoracic and abdomina  | 45 | Doppler               | 464545 |
| Arteriography                                 | 0  | Unspecified technique | 470000 |
| Head arteriography                            | 51 | CT                    | 471051 |
| Head arteriography                            | 52 | MRI                   | 471052 |
| Chest arteriography                           | 51 | CT                    | 473051 |
| Chest arteriography                           | 52 | MRI                   | 473052 |
| Abdomen arteriography                         | 51 | CT                    | 475051 |
| Selective visceral arteriography              | 18 | Angiography           | 475518 |
| Pelvic arteriography                          | 51 | CT                    | 477051 |
| Venography                                    | 0  | Unspecified technique | 480000 |
| Hepatic venogram                              | 18 | Angiography           | 485218 |
| Transcatheter tube change                     | 17 | Imaging injection     | 494417 |
| Transcatheter tube change                     | 22 | Fluoroscopy           | 494422 |
| Imaging guidance for needle aspiration biopsy | 41 | Ultrasound real-time  | 497041 |

| Imaging Service Title                                         | N Visits | N Patients |
|---------------------------------------------------------------|----------|------------|
| X-ray unspecified site                                        | 12       | 2          |
| Fluoroscopy unspecified site                                  | 33       | 17         |
| Ultrasound real-time unspecified site                         | 1        | 1          |
| MR spectroscopy unspecified site                              | 19       | 19         |
| Imaging guidance for clinical procedures ultrasound real-time | 27       | 21         |
| Other specified imaging unspecified technique                 | 1        | 1          |
| Other specified x-ray                                         | 13       | 7          |
| Other specified image reconstruction                          | 24       | 18         |
| Whole body ultrasound                                         | 1        | 1          |
| Brain ultrasound                                              | 8        | 8          |
| Brain Doppler                                                 | 1        | 1          |
| Brain CT scan                                                 | 37       | 26         |
| Brain MRI                                                     | 90       | 63         |
| Brain SPECT                                                   | 1        | 1          |
| Neck (soft tissue) x-ray                                      | 6        | 5          |
| Salivary gland Planar imaging                                 | 1        | 1          |
| Combination neuro and head ultrasound                         | 1        | 1          |
| Combination neuro and head CT scan                            | 1        | 1          |
| Combination neuro and head MRI                                | 1        | 1          |
| Dental x-ray                                                  | 2        | 1          |
| Skull and cranium x-ray                                       | 4        | 2          |
| Facial bones CT scan                                          | 5        | 5          |
| Spine x-ray                                                   | 5        | 4          |
| Spine fluoroscopy                                             | 5        | 5          |
| Cervical spine x-ray                                          | 2        | 2          |
| Cervical spine MRI                                            | 12       | 12         |
| Thoracic spine MRI                                            | 12       | 12         |
| Lumbar spine x-ray                                            | 1        | 1          |
| Lumbar spine MRI                                              | 20       | 19         |
| Pelvis x-ray                                                  | 14       | 9          |
| Other specified spine and pelvis x-ray                        | 11       | 3          |
| Shoulder x-ray                                                | 1        | 1          |
| Hand x-ray                                                    | 1        | 1          |
| Lower extremity x-ray                                         | 1        | 1          |
| Hip x-ray                                                     | 4        | 3          |
| Hip ultrasound real-time                                      | 1        | 1          |
| Femur x-ray                                                   | 11       | 6          |

|                                                        |     |    |
|--------------------------------------------------------|-----|----|
| Knee patella and popliteal fossa x-ray                 | 2   | 2  |
| Lower leg x-ray                                        | 2   | 2  |
| Foot x-ray                                             | 4   | 4  |
| Bone density dual photon absorption                    | 2   | 2  |
| Bone scan limited Planar imaging                       | 1   | 1  |
| Skeletal survey x-ray                                  | 4   | 4  |
| Scoliosis survey x-ray                                 | 12  | 6  |
| Extremities ultrasound real-time                       | 2   | 2  |
| Chest x-ray                                            | 97  | 30 |
| Chest ultrasound real-time                             | 2   | 2  |
| Chest CT scan                                          | 15  | 13 |
| Chest imaging other specified technique                | 1   | 1  |
| Chest posterior anterior (PA) x-ray                    | 11  | 7  |
| Chest anterior posterior (AP) x-ray                    | 76  | 32 |
| Chest anterior posterior (AP) fluoroscopy              | 20  | 15 |
| Chest PA and lateral x-ray                             | 148 | 51 |
| Other specified chest x-ray                            | 2   | 2  |
| Abdomen and pelvis ultrasound real-time                | 1   | 1  |
| Abdomen and pelvis CT scan                             | 17  | 13 |
| Upper abdomen fluoroscopy                              | 9   | 6  |
| Upper abdomen ultrasound real-time                     | 44  | 31 |
| Abdomen supine x-ray                                   | 103 | 54 |
| Abdomen supine upright decubitus and cross-table x-ray | 48  | 28 |
| GI bleeding scan (Meckel's scan) Planar imaging        | 1   | 1  |
| Pharynx cine                                           | 28  | 24 |
| Esophagus cine                                         | 1   | 1  |
| Esophagus fluoroscopy                                  | 1   | 1  |
| Gastroesophageal reflux study Planar imaging           | 4   | 3  |
| Stomach and upper GI fluoroscopy                       | 24  | 24 |
| Upper GI with small bowel follow-through fluoroscopy   | 3   | 3  |
| Pylorus ultrasound real-time                           | 1   | 1  |
| Gastric emptying study Planar imaging                  | 5   | 4  |
| Liver and biliary tree x-ray                           | 1   | 1  |
| Liver and biliary tree ultrasound real-time            | 1   | 1  |
| Gall bladder ultrasound real-time                      | 1   | 1  |
| Kidney ultrasound real-time                            | 20  | 5  |
| Kidney ultrasound B-mode                               | 1   | 1  |
| Voiding cystogram and cystourethrogram fluoroscopy     | 3   | 2  |

|                                                                    |    |    |
|--------------------------------------------------------------------|----|----|
| Female reproductive system and pelvis ultrasound real-time         | 3  | 3  |
| Testicle ultrasound real-time                                      | 5  | 5  |
| Retroperitoneum ultrasound real-time                               | 14 | 12 |
| Heart nonstress test ultrasound                                    | 44 | 22 |
| Heart nonstress test ultrasound real-time                          | 15 | 13 |
| Heart nonstress test Doppler                                       | 24 | 17 |
| Heart nonstress test Doppler color flow                            | 24 | 17 |
| Noninvasive vascular ultrasound of lower extremity                 | 10 | 7  |
| Noninvasive vascular Doppler of lower extremity                    | 1  | 1  |
| Noninvasive vascular ultrasound of abdomen                         | 17 | 14 |
| Noninvasive vascular Doppler of abdomen                            | 5  | 5  |
| Noninvasive vascular Doppler of thoracic and abdominal aorta       | 2  | 2  |
| Arteriography unspecified technique                                | 2  | 2  |
| Head arteriography CT scan                                         | 2  | 2  |
| Head arteriography MRI                                             | 2  | 2  |
| Chest arteriography CT scan                                        | 1  | 1  |
| Chest arteriography MRI                                            | 1  | 1  |
| Abdomen arteriography CT scan                                      | 3  | 3  |
| Selective visceral arteriography angiography                       | 2  | 2  |
| Pelvic arteriography CT scan                                       | 1  | 1  |
| Venography unspecified technique                                   | 1  | 1  |
| Hepatic venogram angiography                                       | 1  | 1  |
| Transcatheter tube change imaging injection                        | 7  | 5  |
| Transcatheter tube change fluoroscopy                              | 4  | 4  |
| Imaging guidance for needle aspiration biopsy ultrasound real-time | 9  | 6  |

| Clinical Area | Clinical Area Title    | Clinical Service |
|---------------|------------------------|------------------|
| 5111          | Cardiovascular service | 511101           |
| 5111          | Cardiovascular service | 511103           |
| 5111          | Cardiovascular service | 511157           |
| 5111          | Cardiovascular service | 511161           |
| 5111          | Cardiovascular service | 511175           |
| 5139          | Cardiovascular service | 513999           |
| 5150          | Neurological service   | 515001           |
| 5150          | Neurological service   | 515007           |
| 5150          | Neurological service   | 515011           |
| 5150          | Neurological service   | 515015           |
| 5150          | Neurological service   | 515033           |
| 5150          | Neurological service   | 515099           |
| 5211          | Respiratory service    | 521100           |
| 5211          | Respiratory service    | 521101           |
| 5211          | Respiratory service    | 521103           |
| 5211          | Respiratory service    | 521107           |
| 5211          | Respiratory service    | 521111           |
| 5211          | Respiratory service    | 521117           |
| 5211          | Respiratory service    | 521121           |
| 5211          | Respiratory service    | 521125           |
| 5211          | Respiratory service    | 521127           |
| 5211          | Respiratory service    | 521131           |
| 5211          | Respiratory service    | 521135           |
| 5211          | Respiratory service    | 521143           |
| 5211          | Respiratory service    | 521145           |
| 5211          | Respiratory service    | 521146           |
| 5211          | Respiratory service    | 521148           |
| 5211          | Respiratory service    | 521151           |
| 5211          | Respiratory service    | 521155           |
| 5211          | Respiratory service    | 521156           |
| 5211          | Respiratory service    | 521157           |
| 5211          | Respiratory service    | 521162           |
| 5211          | Respiratory service    | 521164           |
| 5211          | Respiratory service    | 521166           |
| 5211          | Respiratory service    | 521167           |
| 5211          | Respiratory service    | 521169           |
| 5211          | Respiratory service    | 521171           |

|      |                                     |        |
|------|-------------------------------------|--------|
| 5211 | Respiratory service                 | 521172 |
| 5211 | Respiratory service                 | 521173 |
| 5211 | Respiratory service                 | 521175 |
| 5211 | Respiratory service                 | 521183 |
| 5211 | Respiratory service                 | 521190 |
| 5211 | Respiratory service                 | 521199 |
| 5251 | Urological service                  | 525131 |
| 5252 | Renal clinic service                | 525201 |
| 5252 | Renal clinic service                | 525299 |
| 5253 | Obstetric and gynecological service | 525311 |
| 5253 | Obstetric and gynecological service | 525325 |
| 5253 | Obstetric and gynecological service | 525331 |
| 5253 | Obstetric and gynecological service | 525399 |
| 5310 | Oncology service                    | 531099 |
| 5311 | Oncology service                    | 531110 |
| 5315 | Hematology service                  | 531515 |
| 5315 | Hematology service                  | 531531 |
| 5315 | Hematology service                  | 531541 |
| 5315 | Hematology service                  | 531543 |
| 5350 | Rehabilitative service              | 535011 |
| 5350 | Rehabilitative service              | 535012 |
| 5350 | Rehabilitative service              | 535013 |
| 5350 | Rehabilitative service              | 535014 |
| 5350 | Rehabilitative service              | 535015 |
| 5350 | Rehabilitative service              | 535019 |
| 5351 | Rehabilitative service              | 535110 |
| 5351 | Rehabilitative service              | 535120 |
| 5352 | Rehabilitative service              | 535213 |
| 5352 | Rehabilitative service              | 535299 |
| 5353 | Rehabilitative service              | 535301 |
| 5353 | Rehabilitative service              | 535303 |
| 5353 | Rehabilitative service              | 535307 |
| 5353 | Rehabilitative service              | 535311 |
| 5353 | Rehabilitative service              | 535315 |
| 5353 | Rehabilitative service              | 535317 |
| 5353 | Rehabilitative service              | 535321 |
| 5353 | Rehabilitative service              | 535323 |
| 5353 | Rehabilitative service              | 535351 |

|      |                                       |        |
|------|---------------------------------------|--------|
| 5353 | Rehabilitative service                | 535353 |
| 5353 | Rehabilitative service                | 535358 |
| 5353 | Rehabilitative service                | 535399 |
| 5354 | Orthopedic service                    | 535411 |
| 5411 | Gastrointestinal service              | 541101 |
| 5411 | Gastrointestinal service              | 541131 |
| 5411 | Gastrointestinal service              | 541141 |
| 5411 | Gastrointestinal service              | 541190 |
| 5411 | Gastrointestinal service              | 541195 |
| 5412 | Gastrointestinal service              | 541299 |
| 5451 | Ophthalmic service                    | 545199 |
| 5510 | Psychological and psychiatric service | 551010 |
| 5510 | Psychological and psychiatric service | 551059 |
| 5510 | Psychological and psychiatric service | 551070 |
| 5512 | Pediatric clinic service              | 551215 |
| 5512 | Pediatric clinic service              | 551299 |
| 5991 | Other clinical service                | 599110 |
| 5991 | Other clinical service                | 599111 |
| 5991 | Other clinical service                | 599115 |
| 5991 | Other clinical service                | 599131 |
| 5991 | Other clinical service                | 599133 |
| 5991 | Other clinical service                | 599134 |
| 5991 | Other clinical service                | 599137 |
| 5991 | Other clinical service                | 599138 |
| 5991 | Other clinical service                | 599140 |
| 5991 | Other clinical service                | 599150 |
| 5991 | Other clinical service                | 599155 |
| 5999 | Other clinical service                | 599900 |



| Clinical Service Title                                  | N Visits | N Patients |
|---------------------------------------------------------|----------|------------|
| Electrocardiography (EKG) testing                       | 103      | 55         |
| Holter monitor testing                                  | 1        | 1          |
| Central venous catheter insertion                       | 16       | 10         |
| Peripherally inserted central catheter procedure (PICC) | 20       | 17         |
| Cardiopulmonary resuscitation (CPR)                     | 9        | 6          |
| Other specified cardiovascular service                  | 15       | 2          |
| Electroencephalography (EEG)                            | 107      | 55         |
| Electromyography (EMG)                                  | 4        | 4          |
| Nerve conduction velocity study (NCV)                   | 17       | 11         |
| Evoked response study                                   | 32       | 25         |
| Polysomnogram                                           | 18       | 9          |
| Other specified neurological service                    | 10       | 10         |
| Respiratory service unspecified                         | 7        | 2          |
| Pulmonary function test                                 | 25       | 18         |
| Airway measurement                                      | 9        | 5          |
| Lung volume measurement                                 | 19       | 13         |
| Diffusion measurement testing                           | 1        | 1          |
| Best and maximum PEEP study                             | 10       | 1          |
| Oxygen uptake (VO <sub>2</sub> )                        | 1        | 1          |
| Transcutaneous monitoring                               | 9        | 6          |
| Oximetry                                                | 166      | 33         |
| End tidal CO <sub>2</sub> monitoring                    | 30       | 19         |
| Exercise test of pulmonary function                     | 2        | 1          |
| Cough and deep breathing treatment                      | 31       | 7          |
| Chest physical therapy                                  | 92       | 29         |
| Sputum induction                                        | 2        | 2          |
| Intermittent positive pressure breathing (IPPB)         | 10       | 6          |
| Metered dose inhaler treatment (MDI)                    | 38       | 14         |
| Airway maintenance                                      | 7        | 7          |
| Nebulized mist treatments (NMT)                         | 160      | 39         |
| Continuous nebulization                                 | 12       | 8          |
| Continuous positive airway pressure (CPAP)              | 22       | 10         |
| Bilevel positive airway pressure (BiPAP)                | 17       | 12         |
| Mechanical ventilation                                  | 70       | 25         |
| Manual ventilation                                      | 1        | 1          |
| Other specified ventilation assistance                  | 13       | 9          |
| Oxygen therapy                                          | 134      | 45         |

|                                                     |     |    |
|-----------------------------------------------------|-----|----|
| High flow nasal cannula supportive therapy          | 3   | 2  |
| Nitric oxide therapy                                | 3   | 3  |
| Special gas therapy                                 | 17  | 6  |
| Extubation                                          | 5   | 4  |
| Respiratory endoscopic procedure                    | 5   | 4  |
| Other specified respiratory service                 | 19  | 9  |
| Urinary catheterization                             | 23  | 16 |
| Hemodialysis                                        | 1   | 1  |
| Other specified renal clinic service                | 16  | 3  |
| Genetic counseling                                  | 1   | 1  |
| Postpartum service                                  | 1   | 1  |
| Fetal stress test (FST)                             | 1   | 1  |
| Other specified obstetric and gynecological service | 3   | 3  |
| Other specified radiation therapy service           | 1   | 1  |
| Chemotherapy administration                         | 4   | 3  |
| Transfusion of blood and blood components           | 12  | 9  |
| Allogeneic bone marrow transplant                   | 25  | 22 |
| Bone marrow and stem cell services                  | 25  | 23 |
| Bone marrow donor search activities                 | 12  | 12 |
| Physical therapy evaluation                         | 163 | 68 |
| Occupational therapy evaluation                     | 127 | 58 |
| Speech and language evaluation                      | 14  | 12 |
| Swallowing evaluation                               | 77  | 47 |
| Hearing evaluation                                  | 19  | 18 |
| Other specified evaluation                          | 3   | 3  |
| Physical therapy                                    | 143 | 57 |
| Occupational therapy                                | 38  | 26 |
| Electrical stimulation                              | 1   | 1  |
| Other specified modality                            | 1   | 1  |
| Ambulation training                                 | 6   | 5  |
| Orthotic or prosthetic training                     | 31  | 21 |
| Gait training                                       | 16  | 11 |
| Neuromuscular reeducation                           | 26  | 18 |
| Activities of daily living training (ADL)           | 38  | 19 |
| Speech and language therapy                         | 24  | 18 |
| Swallowing therapy                                  | 49  | 35 |
| Wound care                                          | 6   | 3  |
| Prosthetic equipment service                        | 3   | 1  |

|                                                        |     |    |
|--------------------------------------------------------|-----|----|
| Orthotic equipment service                             | 2   | 2  |
| Adaptive equipment training                            | 3   | 2  |
| Other specified rehabilitative service                 | 7   | 7  |
| Casting and strapping                                  | 5   | 5  |
| Esophageal pH study                                    | 5   | 5  |
| Nasogastric tube placement                             | 9   | 5  |
| Enterostomal service                                   | 17  | 15 |
| Gastrointestinal endoscopic and laparoscopic procedure | 22  | 13 |
| GI endoscopy capsule                                   | 1   | 1  |
| Other specified gastrointestinal service               | 10  | 4  |
| Other specified ophthalmic service                     | 3   | 2  |
| Psychological testing and assessment                   | 7   | 3  |
| Other specified therapy                                | 11  | 4  |
| Pain clinic services                                   | 3   | 2  |
| Immunization                                           | 20  | 8  |
| Other specified pediatric clinic service               | 189 | 34 |
| Transportation activities                              | 13  | 8  |
| Ambulance transport                                    | 7   | 5  |
| Courier transportation activities                      | 7   | 4  |
| Injection of drug                                      | 14  | 10 |
| Intravenous therapy service                            | 222 | 70 |
| Intraosseous infusion                                  | 3   | 3  |
| Drug therapy consultation                              | 7   | 3  |
| Vascular access device therapy service                 | 57  | 23 |
| Educational service                                    | 12  | 9  |
| Organ transplant service                               | 2   | 1  |
| Cryopreservation                                       | 21  | 19 |
| Surgical procedure                                     | 139 | 54 |

| Other Category | Other Category Title       | Other Service | Other Service Title                                  |
|----------------|----------------------------|---------------|------------------------------------------------------|
| 600            | Nursing unit               | 600105        | Pediatric unit unspecified                           |
| 600            | Nursing unit               | 600115        | Pediatric general medical unit                       |
| 600            | Nursing unit               | 600145        | Pediatric hematology/oncology unit                   |
| 600            | Nursing unit               | 600155        | Pediatric neurology unit                             |
| 600            | Nursing unit               | 600175        | Pediatric pulmonary care unit                        |
| 600            | Nursing unit               | 600205        | Pediatric surgical unit                              |
| 600            | Nursing unit               | 600215        | Pediatric bone marrow transplant unit                |
| 600            | Nursing unit               | 600225        | Other specified pediatric transplant unit            |
| 600            | Nursing unit               | 600245        | Pediatric orthopedic unit                            |
| 600            | Nursing unit               | 600255        | Pediatric research unit                              |
| 600            | Nursing unit               | 600265        | Pediatric medical/surgical combined unit             |
| 600            | Nursing unit               | 600295        | Other specified pediatric medical/surgical unit      |
| 600            | Nursing unit               | 600440        | Labor delivery recovery and postpartum unit          |
| 600            | Nursing unit               | 600510        | Nursery step-down unit                               |
| 600            | Nursing unit               | 600520        | Neonatal intensive care unit (NICU)                  |
| 600            | Nursing unit               | 600605        | Pediatric intensive care unit                        |
| 600            | Nursing unit               | 600665        | Pediatric trauma unit                                |
| 600            | Nursing unit               | 600685        | Pediatric bone marrow transplant intensive care unit |
| 600            | Nursing unit               | 600705        | Pediatric step-down unit unspecified                 |
| 600            | Nursing unit               | 600725        | Pediatric surgical step-down unit                    |
| 600            | Nursing unit               | 600735        | Pediatric coronary step-down unit                    |
| 600            | Nursing unit               | 600755        | Pediatric bone marrow transplant step-down unit      |
| 600            | Nursing unit               | 600765        | Pediatric medical/surgical combined step-down unit   |
| 600            | Nursing unit               | 600795        | Other specified pediatric step-down unit             |
| 600            | Nursing unit               | 600805        | Pediatric rehabilitation unit                        |
| 601            | Psychiatric treatment unit | 601105        | Child psychiatric treatment unit                     |
| 611            | Treatment room service     | 611110        | Operating room service                               |
| 611            | Treatment room service     | 611111        | Ambulatory surgery service                           |
| 611            | Treatment room service     | 611113        | Recovery room service                                |
| 611            | Treatment room service     | 611119        | Other specified treatment room service               |
| 612            | Anesthesia service         | 612110        | Preoperative evaluation                              |
| 612            | Anesthesia service         | 612120        | Intubation procedure                                 |
| 612            | Anesthesia service         | 612130        | General anesthesia service                           |
| 612            | Anesthesia service         | 612150        | Regional anesthesia service                          |
| 612            | Anesthesia service         | 612180        | Conscious sedation service                           |
| 612            | Anesthesia service         | 612199        | Other specified anesthesia service                   |
| 613            | Emergency room service     | 613100        | Emergency room service unspecified                   |

|     |                         |        |                                        |
|-----|-------------------------|--------|----------------------------------------|
| 613 | Emergency room service  | 613110 | Emergency room level I service         |
| 613 | Emergency room service  | 613120 | Emergency room level II service        |
| 613 | Emergency room service  | 613130 | Emergency room level III service       |
| 613 | Emergency room service  | 613140 | Emergency room level IV service        |
| 613 | Emergency room service  | 613150 | Emergency room level V service         |
| 613 | Emergency room service  | 613160 | Fast track center service              |
| 613 | Emergency room service  | 613180 | Emergency room observation time        |
| 613 | Emergency room service  | 613190 | Emergency room professional fee        |
| 613 | Emergency room service  | 613199 | Other specified emergency room service |
| 620 | Dietary service         | 620090 | Other specified dietary item           |
| 620 | Dietary service         | 620100 | Adult enteral products                 |
| 620 | Dietary service         | 620105 | Pediatric enteral products             |
| 620 | Dietary service         | 620199 | Other specified dietary service        |
| 630 | Social service          | 630001 | Social service interview               |
| 690 | Other ancillary service | 690005 | Business office service                |
| 690 | Other ancillary service | 690110 | Pharmacy statistical service           |
| 690 | Other ancillary service | 690120 | Supply statistical service             |
| 690 | Other ancillary service | 690130 | Laboratory statistical service         |
| 690 | Other ancillary service | 690140 | Imaging statistical service            |
| 690 | Other ancillary service | 690150 | Clinical statistical service           |
| 690 | Other ancillary service | 690160 | Ancillary statistical service          |
| 690 | Other ancillary service | 690200 | Professional fees                      |
| 699 | Unmapped codes          | 699999 | Unmapped charge code                   |

| N Visits | N Patients |
|----------|------------|
| 24       | 13         |
| 39       | 23         |
| 70       | 24         |
| 29       | 14         |
| 5        | 4          |
| 40       | 18         |
| 9        | 6          |
| 4        | 4          |
| 1        | 1          |
| 1        | 1          |
| 128      | 43         |
| 64       | 23         |
| 1        | 1          |
| 2        | 2          |
| 5        | 5          |
| 102      | 47         |
| 9        | 7          |
| 3        | 3          |
| 4        | 4          |
| 1        | 1          |
| 1        | 1          |
| 2        | 2          |
| 7        | 5          |
| 7        | 5          |
| 5        | 3          |
| 4        | 1          |
| 165      | 78         |
| 3        | 2          |
| 203      | 86         |
| 3        | 2          |
| 13       | 7          |
| 7        | 6          |
| 33       | 14         |
| 17       | 10         |
| 14       | 11         |
| 178      | 74         |
| 2        | 1          |

|     |    |
|-----|----|
| 9   | 7  |
| 34  | 16 |
| 113 | 42 |
| 99  | 45 |
| 201 | 66 |
| 3   | 3  |
| 1   | 1  |
| 33  | 7  |
| 1   | 1  |
| 20  | 6  |
| 19  | 5  |
| 26  | 12 |
| 178 | 55 |
| 1   | 1  |
| 4   | 2  |
| 36  | 23 |
| 2   | 2  |
| 47  | 30 |
| 24  | 8  |
| 186 | 54 |
| 69  | 30 |
| 83  | 18 |
| 44  | 15 |
